# Supplementary material for: Evolutionary history and structure of nuclear matrix constituent proteins, the plant analogues of lamins
Source: PubMed Central journal article supplement — J Exp Bot. 2019 Mar 2;70(10):2651–64. doi: 10.1093/jxb/erz102 (PMC6506774; doi:10.1093/jxb/erz102), 2019-03-02
Supplement: erz102_suppl_supplementary_dataset_s1.pdf [file erz102_suppl_supplementary_dataset_s1.pdf]

**Supplementary dataset S1.** Accession data and sequences used for the phylogenetic analyses.

|         |                               |                                         |                                                                                                                                                                                                                                                                                                                                                                                                                                                                                                                                                                                                                                                                                                                                                                                                                                                                                                                                                                                                                                                                                                                                                                                                                                                                                                                                                   |
|---------|-------------------------------|-----------------------------------------|---------------------------------------------------------------------------------------------------------------------------------------------------------------------------------------------------------------------------------------------------------------------------------------------------------------------------------------------------------------------------------------------------------------------------------------------------------------------------------------------------------------------------------------------------------------------------------------------------------------------------------------------------------------------------------------------------------------------------------------------------------------------------------------------------------------------------------------------------------------------------------------------------------------------------------------------------------------------------------------------------------------------------------------------------------------------------------------------------------------------------------------------------------------------------------------------------------------------------------------------------------------------------------------------------------------------------------------------------|
| AcNMCP1 | <i>Allium cepa</i>            | NCBI<br>BAM10996.1                      | MLTPQRSASLSKSVSSEKPRSKGKITKNLDSAATPFPPPLGLLNGGDL<br>DRGGEDMEAWKRFKDEGLLDESICYKKDRESLASRIIELEKDLHEYQYN<br>MGLLLIEKKEWSSHFEEMKMRLAEAEIILKREQAAHIIALTESEKREDNL<br>RKALGVEKQCVDLEKALREMRSEIAEVKYTAEKKMTEAFALASIEEK<br>RLDTERKLHSADAKLAEASRSSEINRKLLEDVEDRERKVVQRELSINSER<br>KALEKDISEQKEHLREWEEKLQDGNRLLDQQRHINEREERINEAEGG<br>LKKKEELEEAKRSIEGTRNTLKRKEEDLDVRLRSLVSKEKEIELKMKNLQ<br>KKEKDLHEIAEKLDHREREEIQKLLDEHRATLDTKKREFELELESKRKSVD<br>EELKSKFAAVNKAKEVNRKQGLISEGEKELESKMDKIKIKEKDLTKSK<br>ALKKWEESLKSDEKLVAEKDQIMKDTHELKVSINELESRLDALNAEQH<br>QIAEEREKLEISKEEREQYIQKQSELKQEIERYNMQEELSKGIESLREER<br>EKFEKEWESLDEKKITLQRETKKIHEEKEKLEKWHHKDQERLRNEEANA<br>KADIERQLEDIKLQKEAFENTMKHERLMAQEEVARRLADVTRLELRK<br>HDLEMNMQKKQEEIERKLGKEREFEETRKEAELSRLTSLINLNSKLQK<br>LRIEQDRLDREKEEVELQKKLQEDQSEIQRDVDTLRQLSKNLKNQRAE<br>FIKEKECFLAAAERCKTCQNCGVSSISELEMVGIQSSAEIENADIVLPSLT<br>DDHIEQHMKNGKSHVTSPTGSRVFGSGFLQCKTKIFKFSFGKNAETS<br>ATTPPLVFGEEIDIAASEDAAANDNNPAADVERTVNPVSLVFGQDLT<br>AASEDAAANDNNPAADVERTVNPVPLAPVATEQNETEESLPPEND<br>SPPKQRGGGRQSTRRGRGGKTVRRTRTMEAVVDDAKAILGDTLIVEEAK<br>ESSQQNDEQSQGASVHTGGTSNTRQKRRRAPASEMTNSEHDVEESE<br>SQSQSISIGRGRKRKQTSAASEVQAPVVERRYNLRHSTVAKNSVAATL<br>AVSDQAKVQTKASHQASHDNNQISMGDDPALEGSHKVHTHTVQKTTT<br>ASVMEVSSKPAMEETHEENIVRSVEISEMSASEEAEGEVQGVPIAEE<br>PATPSSGSSSTSGDIGNDDDDMDDDEEERHNASIGKKLWNFFTT |
| AcNMCP2 | <i>Allium cepa</i>            | NCBI<br>BAV92747.1                      | MASPEAATVTALTVRCKVPFASPPSKEETIWKRLVDAGFDEEMVERRD<br>KAALISYISQLESELYEQHNLLGILLILEKKEWMSKCEQAQASADVARNV<br>YKRDQAAHSSALAEARKEEGLKRALAIEKECLANIEKALHDMRAEAAA<br>ETKLAYERKVVVAHEMMKDXRKLLEAEAKRQSAESLHAEAIRFRSSAL<br>INSQDIEAREDDLRRRQTSFQAECDAKEKELGLQRQSLYDSRKILHQEQ<br>ERLLEGKNLFTQRENYIYEKTKKLSCFEKELNEAKIKHEEECRRLAERRSSL<br>DLDTAALTNREESLVERELEDRRERELLLLKEKILSKEFEGQLKLDSEHQ<br>YTLKKKKQFEFAELEAKLKFEDDIGARTSLFVEKELEFSERENTLKEKEY<br>IEALSKLSEQQADIPEKLLKLLDEKKEYLQSIKKESESSALNLKNETEEMK<br>RMELELEKIRSSLEHKKEEILLEQKKLEISDRERNDLLILETKLKEEIDSFRC<br>KKSCLDLEADKLKAEKEKFEAEWDIIDEKKEEIRKEAERVADERKLITTYL<br>KNEHDSTKLERENLRNHFKSEAYFLSREREFFMNRMEQEHSEWILKIQ<br>RERDDFVRDILVQRKELENCIEKRREEVENYLKEEEAFEQEAKAKELEHI<br>NSQKQSIAEQLKHVESELKRLDKERVEIALDRELREWEAEVKSSEIEML<br>DIMREKLQKQRESLHADRKEIYDKIQLHNNLENLDIELGNKAAAYELNPQ<br>HMVSGNSSLKKCANNEIKNGQSSYNKEMKLTNSSPSISATSFVKKYAK<br>AIFRSWSDMSDGEEAKTIQILGKGAKKASEVEYEISADRKNVRKRFNES<br>AQVDETGVVFDGEKQKKAKHSQSDAVEEMSAFC                                                                                                                                                                                                                                                                                                                                                                 |
| Aco1l   | <i>Aquilegia<br/>coerulea</i> | Phytozome<br>12<br>Aqua_006_<br>00294.1 | MLTPRRAGWPSNWSSTPKTTNSRNNNNNNNNVVDNRSISKGKAVALF<br>ETPPPPSSLGGRGGEVDIDGGEDQEVWKKFREGLLDEATLLKRD<br>REALAEKVSIVENELLEYQYNMGLLLIEKRDWTSKLDLRLQALAEANEL<br>LKRETTAGRNAISEAEKREDNLRKALGVEKQCVDLEKALREMRTESAE<br>IKYTADSKMAEANALIAKTEEKSLVESKLHAADAKLAEASRKSSDLERK<br>LKEIEARESSLRSERQSFNAERGMHESALSQREELADWERTLQEREER<br>LSEGRIINQREEKANESDLLLLKQKEKDLLEEVQKQIENKNEILRMEEDDI<br>NRRLAILSAGEAEAMVKKLELKEKELNALEERLNVREVEIQKLVDHEH                                                                                                                                                                                                                                                                                                                                                                                                                                                                                                                                                                                                                                                                                                                                                                                                                                                                                                                      |

|         |                       |                                          |                                                                                                                                                                                                                                                                                                                                                                                                                                                                                                                                                                                                                                                                                                                                                                                                                                                                                                                                                                                                                                                                                                                                                                                                                                                                                                                                                                                                                                                                                                                      |
|---------|-----------------------|------------------------------------------|----------------------------------------------------------------------------------------------------------------------------------------------------------------------------------------------------------------------------------------------------------------------------------------------------------------------------------------------------------------------------------------------------------------------------------------------------------------------------------------------------------------------------------------------------------------------------------------------------------------------------------------------------------------------------------------------------------------------------------------------------------------------------------------------------------------------------------------------------------------------------------------------------------------------------------------------------------------------------------------------------------------------------------------------------------------------------------------------------------------------------------------------------------------------------------------------------------------------------------------------------------------------------------------------------------------------------------------------------------------------------------------------------------------------------------------------------------------------------------------------------------------------|
|         |                       |                                          | <p>NAVLESEKHEFELELDNKRKSVDEELKAKVVAVEHREIEINHREEKIAKR<br/> EQAVEKKMEKSKEKEKVLSEKSKSLKDWEKSIKDEEKNIEIEKKQMAAD<br/> KESLQILIAKLEKDRADIKKEQERLLGLEEKLVTEEERTEHLRLKSELKQEI<br/> EKWKRQEEELLMKEHQDLRQDRENFKEKWDVLDEKRAEIIKELERSLE<br/> KESYEKMKHLEERLKNKEMATEEYVQRELEDLRLQKESFKEMRDER<br/> SVAVEKAQSEREDLIREFQLRERELEADMQNKLEERERDLRERKREFEE<br/> QRDRQLNEIKNLREVAGREMEDMELDRKKIVKEKEKIAADKQHLEGQ<br/> QLDMRKDIDKLDNLIKLRYQREQFKLFIKYEKYSCKHCGETISDFVLSL<br/> HSLEEMEDFEALSPRRAEQYLESMRGYPSSRLVTEVPLKTGSGMSF<br/> IRKCKSLIVNLSPLAKSRDPVDESPQPIHTNIETLNGLEGAENTVEPSYDI<br/> PSDSIDDQRIQSGDSGMHLLAEPNLSVDEQINMDIVSRVPEDLQHSEK<br/> NNGRTKYGKKRNPVRRTRSVKAVVEESKAFLGESQELREDRQQNGN<br/> AGDSVHVNEESRDESSLADKTATGRQKRNRHTSRSTASDQDVEEND<br/> ARSESVTAGRKKRRQTVASGFQTPVEKRYNLRPKTVRTEVSSDAVKG<br/> KKKEADVAKVTREESTHLDQVTTVKIVEEVREFTSDGVVRFDTVAEND<br/> GSNVYATKVMENNELGEEVNETKEPSGDYVDEDFGESETGVEVGFGD<br/> ENDDDDELEHPGEASIGKKLWTFFTT</p>                                                                                                                                                                                                                                                                                                                                                                                                                                                                                                                                                                                   |
| Aco1II  | Aquilegia<br>coerulea | Phytozome<br>12<br>Aqcoe3G337<br>000.1   | <p>MFTTPPKRRTVTTDWSHTPHRSGGGGGGGVLISNPRIIDTSMKGGKTIV<br/> IANERFTPQRHSGSLMRKFDGEIDSEAMDWQKFKEEGLLDQSFLNQ<br/> DRQALVQKISNLEKELSAYQYNMGLLLMKKESDSTYDELEQALSESKE<br/> ILNREQIAHLMAMSEVEERNENLKKALEDEKQRMANYENALHDICAE<br/> ENVKSTSNEKIAEAHALVSSVEEESLTMKAKLHASDAKLAEGSRKNSEM<br/> ERKLEMETNECLLRTEREALNAEKEMNEVTWSKQREELKDWESSLLE<br/> REERQLEGQRTLNRQEEESYSRINQKEKDLEEAQRRTIIEASKLNKEDD<br/> MNTTFAKFAEKEEENAMEKNLQKKEEELLALEEKLVAEKIAIQKLYD<br/> EHNAILNLKRHEFELEMDQKREVIDEELKSREALVELKEVQVQKEDTS<br/> TKREQILEQKLHTYEEKERDLESKWKDLTERAKSLEAEKKFKMEKEDFL<br/> SDKEKSQLVTDDELKDKLDLDEIQLQLCSEKELKVIEERKEVQRLQSEL<br/> RQEKDKCVLQEEMLSKEQEALKQERKNVEKELKLLDEKKA EVTGLLDQ<br/> VNEEKEKLEKLVSSSEERLKNENLIAQDFIQKELEVLRLKKASFEAHMER<br/> ERLALCEKTQIERHQMIDFDLQKRELELDIQSKLEKENDLLEKERAM<br/> KEEREQELNSINHLREEASKAMKEMSQRRTIEKEIQEVASSKQYLEGL<br/> QIELQKDIDKLNLIKVMNVQSKGFIEFLEKHEKCKCSENINYPAPDDL<br/> KLLQEMGNSEFAMFPSLSEGYTNGNIKVN RVG SVRLAETTSRPI SWL<br/> LQCTSKVLNISP LKKTENS VFQGEAAPQSDVAVPSSKIPLADNIGKVEGL<br/> PNPSVIEHSSNMDQIVAPALEVPEVSVQSESNCGLSKPGRKTRRGVGR<br/> TTSVKTVLEDSKLVLGKAEAAIKGKKPSGVIGV SIGVDEGHAVVGSMDP<br/> IVAPALEDAEVSQSESNCGPSKPKGRKTRRGVGGTNFVKTVVEDSKVE<br/> ALPDPSVNDHSSNMDQIAAPASEVPEVSMQSESNCGPIKPKGRKPRRV<br/> GGRTNSVKTVAEVSKVEGLPKPPESEVPEVSMQSDSNCGPSKPKGRKPR<br/> RVGGRTNSVKTVVEDSKGEGLPDPYVNEHSSNMDQIAALASEVPEVS<br/> VQSESNCGPIKPKGRKPRRGGGRASSVNTVVEDSKLVLGKAEMTIKGNK<br/> ASGMTDVSAGMSMGRGDSIGVDERPAAVGRKQLLSHASNTTANEQ<br/> DVYSSEATSVSASGSKKRKQTVSSGTQVPVENRYNLRRRKM</p> |
| Aco1III | Aquilegia<br>coerulea | Phytozome<br>12<br>Aquca_050_<br>00038.1 | <p>MLTPRRAGWPSNWSSTPKTTNSRNNNNNNKFVDNRSISKRAVALF<br/> ETTPPPPLSSLGGRGGEVDIDGGEEDQEVWKKFREEGLLDEATLLKRD<br/> REALAEKVS RVENELLEYQYNMGLLLIEKRDWTSKLDLRLQALAEANEL<br/> LKRETTARRNAIFEAWRKDNLRKALGVEKQCVDLEKALREMRTE SA<br/> EIKYTADSKMAEANALIAKTEESLEVESKLHAADAKLAEASRKSDDLER<br/> KLKEIARESSLRSERQSFNAERGMHESALSKQREELADWERTLQEREE<br/> RLSEGRRIINQREEKANESDLLLQKQEKDLEEVQKQIENKNEILRMEEDD</p>                                                                                                                                                                                                                                                                                                                                                                                                                                                                                                                                                                                                                                                                                                                                                                                                                                                                                                                                                                                                                                                                                                                         |

|         |                               |                                          |                                                                                                                                                                                                                                                                                                                                                                                                                                                                                                                                                                                                                                                                                                                                                                                                                                                                                                                                                                                                                                                                                                                                                                                                 |
|---------|-------------------------------|------------------------------------------|-------------------------------------------------------------------------------------------------------------------------------------------------------------------------------------------------------------------------------------------------------------------------------------------------------------------------------------------------------------------------------------------------------------------------------------------------------------------------------------------------------------------------------------------------------------------------------------------------------------------------------------------------------------------------------------------------------------------------------------------------------------------------------------------------------------------------------------------------------------------------------------------------------------------------------------------------------------------------------------------------------------------------------------------------------------------------------------------------------------------------------------------------------------------------------------------------|
|         |                               |                                          | INRRLILSAKEGEAEAMVKKLELKEKELNALEERLNVRRERVEIQKLVDE<br>HNAVLESEKHFELELDNKRKSVDEELKAKVVALEHREIEINHREEKIAK<br>REQAVEKKMEKSKEKEKVLESKSKSLKDWEKSIKDEEKNEIEKKQMAA<br>DKESLQILIAKLEKDRADIKKEEQERLLGLEEKFKVTEEERTEHLRLKSELKQ<br>EIEKWKRQEELLMKEHQDLRQDRENFKEWVDVLDEKRAEIIKELERSVL<br>EKESYEKMKHLEERLKNKEMATEEYVIGSQPSEAIKVVHRRSSRNKNK<br>LNANSRSSGLVSVIVDKGRAEDNLEQKRKDLMIAEAEVHRRRLQLISEI<br>GRLMLKASRR                                                                                                                                                                                                                                                                                                                                                                                                                                                                                                                                                                                                                                                                                                                                                                                                |
| Aco1IV  | <i>Aquilegia<br/>coerulea</i> | Phytozome<br>12<br>Aquca_050_<br>00030.1 | MLTPRRAGWPSNWSSTPKTTNSRNNNNNNKFDVNRSISKRKAVALF<br>ETPPPPPLSSLGRRGGEVDIDGGEEDQEVWKKFREEGLLDEATLLKRD<br>REALAEKVSIVENELLEYQYNMGLLLIEKRDWTSKLDLRLQALAEANEL<br>LKRETTAGRNAISEAEEREDNLRKALGVEKQCVVDLEKALREMRITESAE<br>IKYTADSKMAEANALIAKTEEKSLVESKLHAADAKLAEASRKSSDLERK<br>LKEIEARESSLRSERQSFNAERGMHESALSQIEELADWERTLQEREERL<br>SEGRRRIINQREEKANESDLLKQKEKDLEEVQKQIENKNEVHTCFPSHH<br>LLYH                                                                                                                                                                                                                                                                                                                                                                                                                                                                                                                                                                                                                                                                                                                                                                                                            |
| Aco2    | <i>Aquilegia<br/>coerulea</i> | Phytozome<br>12<br>Aquca_017_<br>00100.1 | MTSSYQKERLSITPFSKVGSGGGSSSDVRVLDLVSTPISNGTSSVDE<br>GLSSRLRETGFDEDSIKRKDRALAIYITKLESEVFDYQHMMGLLMEKK<br>DWSSKYEQVKASADSDIMKYKLEQAALLSALAEANKREESLKKSLAIEK<br>ECLTNIKESLHEMRAENAGNKIAVESKMAEACSMLENAQKKFAEAEAK<br>RHAAELLQREASQYHRLAERKLHEVEEREDSLRRHTLSFKSECDAKEKQI<br>SLERQSLCERQRIFQQEQERLLDQGALLSQREKYISEKHQELGTLEKASE<br>DMKSKIENELKALNKEKTDLNMKLAALSTREEAVREREAMLDKKEAELL<br>CAQEFASKEHDEIQKLVAKHETALEIRKVELEKEMEQRMSMEDELE<br>TKRRASELKEVDLRQLEEMILEKEQELDKQSSFLEKEKDVTERLKSLOT<br>KEENLCADQQARELEKIYIQEEKEQIKSMKVDLEKSLDILENKRKEVEEA<br>QVKLDADKHEMNEVQVLEMRLKDELDSIRAQKLDLLTEAENLKAESK<br>FEIEWELIDEKRDELRENERISEERKVSKFLKDERDRLKAEKDALEEF<br>KNDLESLSHEREDFTSKMERERSEWFSKIQLEQANFVQDVELQKIDLEN<br>RIRKRRDEIESYLREKEEAFEQEKAKELRYISSQKEMLAKEWENVKVEIK<br>RLDSERKETTLDREQREKELAEKNSVEELEIQRKLLKEQRELLQADREKI<br>NVQIQHLTQLENLKVTSENLGLSEIEETDCNLTRRDLPARISLGLQTISAD<br>GEVELLTSNEPPTGCLSPSLLPKQSQGSVPPPTSSPFSWISEKIFRRSPEK<br>SSIKHKEKSHGNEGAKLLEDKYLQKNMKVLAQLKNVQDKSDMLEQN<br>MSKVGEERMDSIFGRVQPANYDSEEPKVILEVPSADEIVKGGNNLECEI<br>GTEVNEDILYPDDGLLAGRKRGSPPDFHFDPSLEETRDKKRRRKGKHS<br>EFLEETTSNCDASILEEKDVTSPDQVRSPIDDCVDGVSQAPTGGLTEG<br>KDDSTSTEPEKLVCSQNMILLASPAQADLEGLGTDGNPCTQSRE |
| AgNMCP1 | <i>Apium<br/>graveolens</i>   | NCBI<br>BAI67715.1                       | MLTPPKIFSGWSPRTPTRKTGSGGGDVSKGKDVVFEDEDGLMGRVE<br>NTGENMGLNARLMKLETDFDYQYNMGLLLIEKKEWTLKYEELQRVY<br>DETQDALKQEQAHLNAISDVEKREENLTKALGVEKQCVFDLEKALRD<br>MRSEYAEIKFTSDSKLAEANALIXSVEEKSLVESKLHSADAKLAELSRKS<br>SDIERKSHELEARESALRRERLSLNAERESLTDNISRQREDLREWERKQ<br>EDEERLAEVRRLLNQREERANENDRLYQQKQTELEGEQKKIEIIIASLKN<br>KEDDISSRIEKLNIKEKEADAMKHSLEIKERDLNELEKLNAREQTEIQKL<br>LDEHKAILEVKKHSFELEMERSNDFENDLQSRVVVEKKEVEVKHME<br>VKFAKREQALAQKHEKLEKEQSLVSKLQDLKEREKSMRLEANRIEGER<br>NQLLSDKQELLSLKAIEKDRASTEELKLSKEIEQLKITEERLEHVRLQ<br>SELKEEENWRHRRELLKKEDELKQEKMRFEKEWEDLDEKRTEVMKE<br>LEDITVQKENFEKLLHSEEDRLNKKLDTESYVQKELDARLRARDSFAAT<br>MEHEKSVIAERIASEKNQMLNDFELWKRELESKLFNEMEDKENALSRI                                                                                                                                                                                                                                                                                                                                                                                                                                                                                                 |

|         |                               |                                        |                                                                                                                                                                                                                                                                                                                                                                                                                                                                                                                                                                                                                                                                                                                                                                                                                                                                                                                                                                                                                                                                                    |
|---------|-------------------------------|----------------------------------------|------------------------------------------------------------------------------------------------------------------------------------------------------------------------------------------------------------------------------------------------------------------------------------------------------------------------------------------------------------------------------------------------------------------------------------------------------------------------------------------------------------------------------------------------------------------------------------------------------------------------------------------------------------------------------------------------------------------------------------------------------------------------------------------------------------------------------------------------------------------------------------------------------------------------------------------------------------------------------------------------------------------------------------------------------------------------------------|
|         |                               |                                        | KQFDEEREKELNNINYKKEVVSKEMEDMELERSRIAKEKQEILTHQKHL<br>DEQHLVMRKDIGQLVGLSEKLDQREQFFKERERFIRFVESHKCKNC<br>GEMTSEFVVDLQSLADIENMKALSVPHLAENYLKDLQRTDPKYVSN<br>AIPGADVGSPASGGTKSWLQKCTSKIFIFSASRKNEVASLDQNI SRKLN<br>VEASP KLLNTGVMSEMPSGVEADAFDMQKMQLTNGNIEVGSIDL<br>SGGEQSNIDSKALEVEDSQQSDVRAGYRKP GKRAKSKVNRKRKKEVT<br>EEAKTVHADSVELNENEQSNGLASAYTNESRGDSSLV GKRTNLRKRN<br>NSSQPSQSAAGDVGADYSEEHS SVTAGGRQKRRR KVPAAPAPTG<br>RYNLR RHKTAAPLVANGASSDPNKGKEKEIDDG GSMREDIPDEVDGS<br>THLIQVKTLKRIDVVNEFSSAGFHGTNAACESQDGDADTENQLVSDML<br>LSEEVNGTPEQSREYQNOGDRSGADGEDDGDDEVEHPGEVSISKK<br>VWKFLT                                                                                                                                                                                                                                                                                                                                                                                                                                                                                         |
| AgNMCP2 | Apium<br>graveolens           | NCBI<br>BAI67716                       | MSTPRLTVIQSDKTTVTSSPRVLRNSDDDIWKRLEEAGFDEDSIKRRDK<br>ASLIAYITKLESEIYDHQYQMGLLIMERKEVWSKFEQTEALNSAELMR<br>KHDKASHVAALAEAKKREDNLKKAIEIERECLANIEKTLHELRAEYAETK<br>VSADSKLAEARSMMEDALKKLEADAKMLAAESLEAEAGR FHRAAER<br>KLHEVEAREDDLRRRAASFKTECDTKDEEFLHERQSLCERQKSLQQSQ<br>QRLVDGQELLNKRESHIFDRTOELNRKEKELEASKLKLGEELQVLAEEQ<br>ANLKIKASSLSLREEVTKRECEVKKREEGVLVLQDKLEKESERIQQLLA<br>NYEASLSNKKSDFEAELEMRRKLVHDDIENKRRDWELREVDLHREELI<br>SEKEHELDMQSRAVVDKESYLTERFSLLEKENS LDAMKKEIQSKESLL<br>QKEKEEINSSKLDLQKSLDALKNEKQIHHAEKMKAMKSETDEL FVLE<br>SKLKEEITIRAQKQELEVEADEMKELKLFVEVWQSIDEKRKELQKEAE<br>CINGEREALYRTLKDERNLLEKDAIWDEYTRNNE SLRDREEF LSKM<br>EHERSELF SNIQKERSDFSLAFEVQTKDLEDRLAKRREEIESNLAERERAF<br>EEEKRKELMRIDSLRETLARETEQVNLNRLDTERREINLDREKRDRE<br>WAE LNSSIEELKAQRQKLEKQRELMRADKEDILVQIEHLKQLED RKVVP<br>DRLALTDIQSDVQPSKRVSARRFLKQQSGIDSGCRSENNGNTSPGKS<br>SVIISPPVSTPFSWLKRCASSLLEQKASNKKMRHSEIIVNPSTISARLDAP<br>EDEHAVKSVNQAPVHAKETTVYIDKIITIREVTSFNDGRVNGNSQDPEK<br>GLSLSADEKLEGND DIKSVKPNKNGEVKQKMMQASL TEK                                                    |
| Amhy11  | Amaranthus<br>hypochondriacus | Phytozome<br>12<br>AHYPO_0202<br>07.RA | MIVEAMFTPQKVFSPWSLTPRRENQNTPLPNSNSNARVSGNGGNA<br>SENADDLEDLDERVAKLENELFEYQYNMGLLIEKKEWSSKIDDLQAL<br>TEQKDALKREQAHLVAMSDLEKREENIRKALGVEKQCVIDLEKALRE<br>MRSEYAEIKYTADSKLADASSLAASIEKSLEVEAKLRSADAKFAEASRKS<br>SEIERKLQDLESRESALRRERLSFNSEKDAQDAVLSKQREDLIEWERKLQ<br>EGEERLCEARRILNQREERANEFNKSFQQKEHELAEVQKKIDKANMDL<br>KKKEEISQRLASLTLKEKEFDAIKNRIEIKEKELVAREEQ LNDREKNEIQN<br>LLEHNAQLDAKKQEFELMEQKRRSVDEELSKSVVELEKKEIQINHSE<br>EKIAKRELALDKLEKLEKESALESKTELKEKEKGIKLESKQLEKQKI<br>QEESENLLKLEDLENVKAANEKQLLR IQQKEEELQVTEEEKSEHLRLQS<br>ELKREIENYRSQSEALSKEAADLKQERKKFEQDWDSLDEKRVEVEQELK<br>RLTEEKEKWERWKHLEERLRNEIIASEKKIESERKALELEKDSFAAHVE<br>HQKLLSEREQSERSKMVDELERNKRELEIEMRNMLEEKERDLSERERL<br>FEDESAKEQSNLNYLKETAERGMEEVKEEQRRIAKQIEEVDASKKDLEG<br>RRLEIQKDVDLVLVSGKLDQREQQLVRERERFIEFVQRFKSCEQCGEIT<br>REFMVSDLQYLHDLEKREIPPLKLADAYFRNSIKENLQNDKRV PDSGH<br>IESSTPAKSVSWLRKCTEKILKLSPIKRGELMQNDAREASPVDRGADAD<br>PDPDSDHIVEEVQELSLKVVSDSLDHEAVGNESARVEGDQEPSVGAW<br>CNTNNSKGPASSQNSDFHSQHGGKQRNRVIRTRSVKAVIKDAKNIVG<br>DSIDLSVSEQPNGDAENSTHMDNESREVSSLASKENTKKGRKRGRHT |

|         |                                   |                                        |                                                                                                                                                                                                                                                                                                                                                                                                                                                                                                                                                                                                                                                                                                                                                                                                                                                                                                                                                                                                                                                                                                                                                                                                                                                                                        |
|---------|-----------------------------------|----------------------------------------|----------------------------------------------------------------------------------------------------------------------------------------------------------------------------------------------------------------------------------------------------------------------------------------------------------------------------------------------------------------------------------------------------------------------------------------------------------------------------------------------------------------------------------------------------------------------------------------------------------------------------------------------------------------------------------------------------------------------------------------------------------------------------------------------------------------------------------------------------------------------------------------------------------------------------------------------------------------------------------------------------------------------------------------------------------------------------------------------------------------------------------------------------------------------------------------------------------------------------------------------------------------------------------------|
|         |                                   |                                        | SQTTACEQDDGVSEGRSDSVVAGGPRTRRRRVAANVQVPAEKRYNLR<br>GSKNVAKGAAAKTSSGAQQDLDEDSRKEIVGGNNDPEPSHSAGAASD<br>YIASINLMQVQAEAEATTYSTPVPKRKMESIAQSEEVNGTPNGHDDHD<br>DVNYSIAEGDDDDGDTDEDEEVEHPGEASIGKKLWKFLTT                                                                                                                                                                                                                                                                                                                                                                                                                                                                                                                                                                                                                                                                                                                                                                                                                                                                                                                                                                                                                                                                                     |
| Amhy1II | Amaranthus<br>hypochondriacu<br>s | Phytozome<br>12<br>AHYPO_0029<br>68.RA | MFTPQKKVFPWSLTPRRENQKTPVGNSNSNGTVSENGGNVSGDVG<br>DLEDLDKKVAKLENELFEYQYNMGLLLIEKKEWSSKIDDLQQALTEQKD<br>FLKREQAAHLVIVISDLEKREENLRKALGVEKQCVIDLEKALRELRAEYAEI<br>KFTADSKLTEANSLAANIEEKSLEIEAKLRAADAMYAEFSRKSSEIERKM<br>QDLESRESALRRERLSFNSEKDAHATLSKQREDLLEWERKLNENEERL<br>CEARRILNQREERVNEFDKGFQKESELAELQKKIDKTNMDLKKKEDI<br>SQRLSNLTLKEKEVDAMKKGIEVKEKELLVREQELDEREKNEVQKLLDE<br>HKSQLDAKKQEFEFEMDQKRRSVDEELKSKVVLEKREIEISHAEKIAK<br>REQALEKKLDKFKENALESKLEKHEKEKESINQEKKQLEKEKNQIEKE<br>TENLLKLEDLENVKAANEKLLRIQQEKEELRVTEEEKSEHLRLQSELRR<br>ELDDCRSQKEALLKDAEELKQERIKFEQDWDLSDEKKAEEVEQELKKLLE<br>EKEKWERWRHLEERLRNESIASSEKKIESERKALELEKASFAAHVEHQKL<br>LLLEREQSERSKIVDDLERQKRELEMEMRKILEEKERDLSEREKLFEEERE<br>KEQSNLNYLRETAERGEMTEMKEEQRRIAKQTEEVSASKKDLEGRRLI<br>QKDVDELLVLSGKLDQREQLVRERERFIQVRFKDCQCGEITREFM<br>LSDLQFLHDMEKREILPLPKLAEDYIRNSLKENFSSEFQNDERSPIPGHIE<br>SSTPAKTVSWLRKCTEKILKFSPIKRGEPAAAMEKNVGDASPVDENADA<br>GPASDSHNVVEEHDVSLKMANELFDNQTAVNESVGLGEGDQDPSVG<br>TWGDTTNAKEHETSQKSDFNQHGKPKRRKVNRTSVKAVIKDAKDI<br>VGDSIDLTVSEQPNGDVEDSTHMDDRSREVSGLGKLENLKKGRKRGR<br>TRASQTTASELDDGLSEVRSDSVAGGPRTRRRRVAANVQVPAEKRY<br>NLRNLRVYAGTGAAVKTSSGRRQKKDEKDRKEIVDGNNNPSPSHSAE<br>VADNSASINLMQVQDEEATPVPKRKIDTIVQSEEVNGTPDGHDEHG<br>DVDFSIAAGDDGDEDEDNDEEVEHPGEASIGKKLWKFLTT |
| Amhy2   | Amaranthus<br>hypochondriacu<br>s | Phytozome<br>12<br>AHYPO_0101<br>18.RA | FLFSPCICSIIIFKKGKTHIKVTVELKESFLLGLFRVFFSSLSKSMASPRIPAT<br>PTTLRPINITPGSRILDVSSTPSTNGRTLFSDDGIWKRLRDAGFDEDSIRR<br>RDKAALIAYIAKLEAEIYELQHNMGLLILERKDYASKYEEFRFSVESIEVKH<br>MRDQSALTSALVEARKREDNLKVKLVGVEKECVNLEKALHEMRTCAE<br>VKVTAECKINEARTMIEDAQGKFIEAEAKLRSASLRDEARRSERAER<br>KLQVEAREDDLRRRMASFKSDCAKEKEIMLERQSLTERQKVLSEAQ<br>NKVLDGQALLNQREADFLIKSRTLRRNEKELEDQKENLASEWKILKEQK<br>SNLELNAVSLDEREKAVIEKEILLNKREKDLLVSQEKVASKEHSEVQKYIA<br>EQENALRRRKEEFEAELMVKQKLVEDEIESKKRIWELSELDLKHREYIL<br>EKEQDLEVQARVIADKGDLAENLKAVKEKESLLHKSENEVEQMKITLQ<br>KEREEDKVKIDLEKSLLCFEEKKQIAEGKKRLELMTSESNELLILETKLKE<br>EIDTIRAQKSHLEAAEKLKVEQAKFETEWVIDEKREELRREEERIAGE<br>RLAISKFLKDERDSLNEKEALREYKHDLEALALDREAFRSSEQHEHSE<br>WFSKFQQRADFLLEIECRKRELEDCINKRRDDIESYLKEKEKSFEEKKR<br>ELQYISSLKEGLMKEQEHVAMALKKLEAEKLEIKSDREERDKAWAELQ<br>NLIEELQMQRFLKKEQRELLHADREKINCQIEQLKRLVDKIDSDDKIIVPL<br>TKQMCAETTPVVCVHIPSLEPTQKVTVIEDGQDTGSDSPSSVSWLKK<br>CASLLFKPLPESVSLKRLEPSLQPGGEGQLELLENECLSLDGVIGSEILEIN<br>KQNAGTAVEEPKVIHEVPSVDEDFIDLEATTDVHTSSATPSEVSAGQKR<br>RVDQSSGPDTDALLNDEKVKRRKQKVTASDGFQNVTPHCVELKQ<br>ASDVDDQYIISVSTQSVEQSEFGKSEETFRCAIQKQTCIEEVLIVEDVG<br>DVKRNDDEEGASELKEPQDEDISSVLEKPEIIVQERVTRRSKSKQAS                                                                              |
| Amhy3   | Amaranthus                        | Phytozome                              | MFTPQWKTATSSVPRTKSRFTQITSAKSKELAIQDAPPMPPTTSLAAS                                                                                                                                                                                                                                                                                                                                                                                                                                                                                                                                                                                                                                                                                                                                                                                                                                                                                                                                                                                                                                                                                                                                                                                                                                       |

|        |                   |                                |                                                                                                                                                                                                                                                                                                                                                                                                                                                                                                                                                                                                                                                                                                                                                                                                                                                                                                                                                                                                                                                                                                                                                                                                                                                                       |
|--------|-------------------|--------------------------------|-----------------------------------------------------------------------------------------------------------------------------------------------------------------------------------------------------------------------------------------------------------------------------------------------------------------------------------------------------------------------------------------------------------------------------------------------------------------------------------------------------------------------------------------------------------------------------------------------------------------------------------------------------------------------------------------------------------------------------------------------------------------------------------------------------------------------------------------------------------------------------------------------------------------------------------------------------------------------------------------------------------------------------------------------------------------------------------------------------------------------------------------------------------------------------------------------------------------------------------------------------------------------|
|        | hypochondriacus   | 12<br>AHYPO_0055<br>90.RA      | ESSGFDNGNLEDWKRKFKEAGLLDESAIERKDRQALLDKMSRLEKELFD<br>YQYNMGLLLIEKKDLVSKAENLEQEYSEAQEIIVKRERVAHMIIVSEAEK<br>REESYKNALIAERKSIVDLERAMRDIHEEHAKAKTASSETVTDLNGHMD<br>ELRKRKLDVEEKACSVDAKLAELDRQNFELDRKLQDLEDRENILYREKLS<br>LTQDRESHESNFRRRKEDVLEWERRLQEGEQRLCESRRILNEREEKLHA<br>IDVSSKEKESKMEKLQKEIDLANATLKKVETDVKNELTDLNLKEKTIEAM<br>RCELEARQKKMQEENKLDARERVELEKLLNEHKTVLNAKMHEFESDI<br>KQKGTALEEELKSRKEALDQKEAEINHFEAKLSKREQAVEKKSERVKEKE<br>KNFEANHKSMEKEQKSLKAEERLKVKEQVNAEKENLETLSREIDML<br>RNDVRKQELHIEEELKSLEDAEKARTEYICLQSNLKQEIDSVRRQTIEIK<br>EAAELKLERAKFEKDWEALDEKRAVVDIELKTLAENKANFEKLRNSEEE<br>RLKRERADDEERLRESESITSLKESFEATMKNEKLTADKAEKEYTLMC<br>EDFEKQKLDLYNDMHKRREEWGKLIEEKERALEERQLRERRDLKQLKD<br>DAEKRRGEMELERHRLEKEKEEMELNKKQLEETGIDIFKDIENVLESLSKK<br>LKKQREQLVSRDNFGALIQKIKCCNKCGDSAKAFLCSDFQLPAEEVPL<br>HFPSLYRDTQNNVKDERDPSRDLNKGKSTLHEADRNPSQLSGQMSVL<br>RKCASVIFNLSPQSAAYTQADRNVREQTSALENVNVRAQSSAVDELGP<br>THEIGKDAILFVESNDKVNNDVNSLPVEPNFDESSQKSDVKNGKHQPG<br>KKRGAGVRRTHSVKAVVEDAEAFNRNEKPEVQPNNSTSENVNYQEK<br>LSDDIAPNTNARKRRRSQASKLSEQDQVDNSEGNADSVTTGKRKRGRG<br>QGVASALPTPGQKRYNLRHHAHVPLTEPKITRKQQTAKAAQNLDETPV<br>QSLDQVSDRISHLVEVSTAISIEFSSKKVHAAADAERSVENRLVNAD<br>VKTAEDTMPRPSEINEISENVEEDTGSMVNEDEDDYSDVDMVEED<br>EDHPGQASIGKKLWRFLT |
| Anco1  | Ananas<br>comosus | Phytozome<br>12<br>Aco012716.1 | MFTPQQKKGWSSGWSLSPANPRGSAALGKGGVAEAAAPPPPPP<br>LPAPPHASLGENGVDGEAEVWRRFRDAGLLDESSLQRKDREALAHRIS<br>ELDKELHEYQYNMGLLLIEKKEWTAKYEEMRQGLVEAEEILKREQTAH<br>AIAITELEKREENIRKALGIEKQCVVDLEKALREMRSEMAEVKFTSEKLL<br>AEAHALEASLEEKRLIEAKLHSADARLAEASRKSSQAARKLEDLEARER<br>KLEKEKLSFDTERKTREKHLTEQAEHLRDWELKLQESQNRNLVEGQRSLN<br>DRDERANEKDRALKKKQDELEETRKTIEAMKSSLKRMEDDISTRHALT<br>AKEKDMETRFANLEVKEKELAAKEEMLNERERVGLQKLLDDHNAILES<br>KRKEFDLELQKEKISFDEEMKEKINAVEKKNNEISRKEDQIAKREHTLDS<br>KMQLKDKKEDLEAKSKAMKKWEESVKGEDRKVVEEKERLEREKQQL<br>ENSKSELERLKLVAEKQQIIKERENLKLTEEEREQHFLLSRLKQEIIEY<br>KMHNDSISRESEDLREQREKFEKEWEVLDEKRVAAEAIKKIDEEREKFD<br>KWRHNEEERLNNMELEIEAKCWRELEELRLRKEAFEREMQHEKSEIEE<br>LLKRERANDRNLQLHKHELDMEMERKLIEKEKEMQELESELKKIDFE<br>ENKIRYIDLNESKIQKIKMEKEQLRREAEALLEDKQKLEVDRTIEIKDID<br>SLSVLSRNLKDRREYVKERTRFLALAEQCRVCKNCGVKVIDDLILGLQ<br>DTGNVQMPNLAFFEEQLKSPIAEASPAGTSLNTNSGGRMSWLQKCSRL<br>FNFSPTGKGAEKSTEIEAEPTSFVERLDGEVSEGEADYEPTPSYGIADSL<br>DKDGNPEPEPSYGVADNSTDILRIQSENGGNVPSLDQDNEREESLP<br>VDNNQPESSKRKGGRRPPKRRRTTSKGVRRTRSVKAVVEDAKAILGETSE<br>GNNDYGDGSKGFSNIQEESESVHTELGATSTGKKRRFDNLSGMCAA<br>EGDAEDSEVHSESVVGGRRRQRQSRPAVAQVPGEKRYNFRSTIA<br>GAATAAHAVPNQTKGQNKGGHKQLQENEVDNSRGEGEATSERNVN<br>MAQSVVEVHEFAQNVVQV            |
| Anco2l | Ananas<br>comosus | Phytozome<br>12<br>Aco002253.1 | MSSPRPMATPAISSGGGGGGGAASSPAASGGAVLGDEAIWRRRLREA<br>GLDEETVKRRDKAALIAYISKLESEMHEYQHHLGLLIMEKKEWTSKYDQ<br>LKASAESELMHKRERAAQSTALAEAKKREESLKNALGIEKCVLNIEKA                                                                                                                                                                                                                                                                                                                                                                                                                                                                                                                                                                                                                                                                                                                                                                                                                                                                                                                                                                                                                                                                                                              |

|         |                         |                                                                         |                                                                                                                                                                                                                                                                                                                                                                                                                                                                                                                                                                                                                                                                                                                                                                                                                                                                                                                                                                                                                                                                                                                                                    |
|---------|-------------------------|-------------------------------------------------------------------------|----------------------------------------------------------------------------------------------------------------------------------------------------------------------------------------------------------------------------------------------------------------------------------------------------------------------------------------------------------------------------------------------------------------------------------------------------------------------------------------------------------------------------------------------------------------------------------------------------------------------------------------------------------------------------------------------------------------------------------------------------------------------------------------------------------------------------------------------------------------------------------------------------------------------------------------------------------------------------------------------------------------------------------------------------------------------------------------------------------------------------------------------------|
|         |                         |                                                                         | <p>LHDMRAELAETKVITYESKLAEANQMMEDAQRKSEEAETKLIARSLET<br/> DSIRTRDSALRSLQDVEAREDELRRRLVSFQFEREAKENEISLQRKSLND<br/> SQKILHEEEERLIEKQSLNQRQYILERLENLSQFEKLEEEKSIFEGERK<br/> ALTDERSKLDLNIAAALAIREEAIIQKESLLDKRERELLILQETIASKGQVEV<br/> QRLIDEQHSIMEKRMREFESEMEKKRSMWEDEMGAKKLSLDERENVL<br/> TERANSIQEREKAVEIQLTELAAKQQEVANKLNQIKEEEEENLLSSKRAAE<br/> VELKNMQKEREDIVKFKADSEKTKNSLEGEKQEVLHAKEKLELTLAERN<br/> ELLVLKTKLKEEIDSFRAQKIELLAEADKLQAEKERFEIEWELIDEKKEELQ<br/> KEERIAEECTAISQFLKNEHDSIKQEKENLRNQFKNLDESLSREREEM<br/> TNMQHEQANWLSKIQQEREFFKRDIQIRKELQNSINQREAEIETSLRD<br/> KEEEFEQKAKELQYVTSQKDMIKMQLEHIASQLEMLASERKQIALDR<br/> EQRERELSEIKSSIENLNIQREKLQEQRELLHKDREIEITKQIQILKELEDSNI<br/> ESENRAHSVPTNELRVPIKMHTSNTNNNEEEIIEERNMAIKVKASEAS<br/> PSASTPVFWVRRCAEVVFRSSDKKAYFVADKDAQNRNLENIGKVREE<br/> KKEIQSSLAENVRSIQTVVTSLSGRKRLKNSIPCNDADAELEPSRKQKIGR<br/> QKRRIDGQGKNNCAPEGQPWSSDENPKITNRTGPENVLKMSDDVL<br/> LLDSVFNGLSKTQKQLIDKGAFDSEGPSEEITTPAAKPIASNNHFKKQD<br/> VGDQDDEIDGEDEASVKDKLWNFLIT</p>                                                                                                                                        |
| Anco2II | Ananas<br>comosus       | Phytozome<br>12<br>Aco004979.1                                          | <p>MASPRLRVSPVAATSLGGGGGGDEALWKRLVEAGFDEESVRRRDK<br/> AALIAYIAKLESEIYDYQHMHMGLLIMEKKEWTSKCEQVKASTEESAVAY<br/> NRERVAQLSALAEAKKREENLRKALDIEKECVNVEKALHEVRAELAEIK<br/> VAYERKLAETHLITEVAQRKFEEAEKLLAAKSLEADAKLTRDAALRSLH<br/> DVEAREDDLRRRLISFESECEAKENEISFQRKFLNDSQRVLHEEEERLLEK<br/> QALLNQREECIFDREKELIYLEKRLEDDKSTIVGEFKALKEEKATLDLKIAA<br/> LAAREDAIVRRESLLDKRERELLILQETIACKEHAEIQKLIDEQEAVLGRR<br/> KEEFETEMEKRRKLVEDEMEAKRIFLDHGEADLNERANSIQEKEQAIEL<br/> QLFELAEKQEDIAMRSKQLEEEKENLEKSIKASELELKNIQREREDIAKLK<br/> MELEKAKTSLEEEKIVLTRAQENLEITREERNEVDLEKNLKEEIDSLRAQ<br/> KMELLADADRLQAEKERFEIEWDLIDEKKEELKKEVEMIAEERKAVAQY<br/> LKNEKDSIKQEKNLRSQYMSSVESLSREREEMSHMQREHSNWLSKI<br/> QQEREDFTRDINIQRKDLQNSFYQRRAELETWLRENDEAFTRKLAEEKL<br/> FINSQKKTIEMLQEHVASELQKLDNERKEIALEREQRERELLEIKSSVEVL<br/> NAQREKLQKQRELLHADREASQQIEQLKELQSLDIETETRVLSMAPSN<br/> KESAPMNIKMNVDVLEEIIIEQNTDTNHESMGKYLPEKTSASVPES<br/> TPLSWIRKYTKVIFQRSPENNVNSGSSEHSQSKNLREFVKVTEDSRTDLL<br/> ELDMISNMSPFTQNVESISKMEGQTDMMKISQLGEGVGETTRTVDKIVP<br/> SLGRKRLNGRFRSDHTDMQLEPSRKNQKMSAQKGGDNGLVVAQTK<br/> DLSAFIAKQVAGVALAPREQEQNQDDNEADDEDEKEVPVKEKLWN<br/> FLIT</p> |
| Atr1    | Amborella<br>trichopoda | Phytozome<br>12<br>evm_27.mod<br>el.AmTr_v1.0<br>_scaffold000<br>24.349 | <p>MFTPQQQPTRKAGGIWPFSPNSNKGGPVTRLASPDPPNITGILLHG<br/> GDKGRAKGGVSSSFPLQEEEQATPPPPRASLLSDENGRPRPYSSAS<br/> EVWRHFREAGSLDLDLSLQKKEKDALLSHLAKLEDELFDYQYNMGLLLIE<br/> KKEWTSKYDDLKQALVEAQESLKREQASHLIAELSEVEKREENLRKALGV<br/> EKQCVDLENALHEMRTEFAEIKFTADKKLAEARSLVASIEEKSLEAEAK<br/> LRSADAQLAEASRKSNNLERQLQEIETRESVLRERQSLKAEREAHETTF<br/> NRERENLRNWERKLKEGQERLVESQGLLNQREELANEKEMFLTKKEK<br/> DLEVAWAKFEKGNLNLKDKVEEMNMLRSLTAQEEEA AVRKRNLDE<br/> AQQELHLLQEKLNAREKEGIQKLLDEHNAVLELRKREFDIEMDQKRKSL<br/> EEEFKQVVEQKLVEVDLKEEKINKKEQLLEKRTKTEKEKEDLELTK<br/> SLKEKEKFLKIEQKDLDTDKKMMVIEKADLHSLKLELERIKA AVEEKEKIV<br/> KEQENLKVTEDDKRELLRLOSELKQEIDFRLQKLAVEKEREDLKLKKEK</p>                                                                                                                                                                                                                                                                                                                                                                                                                                                                       |

|      |                            |                                                                         |                                                                                                                                                                                                                                                                                                                                                                                                                                                                                                                                                                                                                                                                                                                                                                                                                                                                                                                                                                                                                                                                                                                                                                                                                                                                                                                            |
|------|----------------------------|-------------------------------------------------------------------------|----------------------------------------------------------------------------------------------------------------------------------------------------------------------------------------------------------------------------------------------------------------------------------------------------------------------------------------------------------------------------------------------------------------------------------------------------------------------------------------------------------------------------------------------------------------------------------------------------------------------------------------------------------------------------------------------------------------------------------------------------------------------------------------------------------------------------------------------------------------------------------------------------------------------------------------------------------------------------------------------------------------------------------------------------------------------------------------------------------------------------------------------------------------------------------------------------------------------------------------------------------------------------------------------------------------------------|
|      |                            |                                                                         | <p>FEREWEVLVVRDEVNKEVELHNVEKDEFLLKRCCEELKLRREEQKTSE<br/> KFQREYEALQLQNSFTENMNHRSVILQNARRERDDMIREFELQKNA<br/> LESSIQNRREDMEKQFLEKERDFQEVRRERMWKEIEAQRELAQKEMEE<br/> MKLERTKLRGRERQEVALSKKHVEGERLEIQKDVEQLHILTTKLKEQREEL<br/> RRERDRILSRIEHLKRGQGDSIDVTDGLALSELQSFKEFENGGNLLPRL<br/> LDGYMKESMQGRSNVGPSNLMEETPPLGAVLNSTSPARFSWLQKCK<br/> SIFKLSPGKRLDEQVTNQEKSPSDVEADADQILENDSGGLVSGGANYS<br/> EPEISVGIQISQAVDFHRRASPESIGRGDEEETVVTSPAADGTQSDML<br/> EMQEGPSASAEISHPSAAAGGRARKKPRRGAPKLTRRTRSVKDVVKES<br/> KAILGESSEELKTEEEESAQANVDSKGGQPIVKKGGRRKQHPPTSTRMS<br/> EQQQDADSQSESVTRGRSKRRQIEPSHIQPPGGRRYNLRHSTLEKHVE<br/> NPVGSQALASKVTTDADENHSQHVTKSPGEVVEGQTSNHIHPDEPSIE<br/> SLENAHGGGEAKTDVRMLQHTKFESIVEIHREFSTQKVMIMETGGALEE<br/> TDVNDPGPNSSSEQEPQANQGGANDLLEYDEDDGGGSGSRGGEDDDGN<br/> DDDDDGYNNDENQEASIGKKLWTFFTT</p>                                                                                                                                                                                                                                                                                                                                                                                                                                                                                                   |
| Atr2 | Amborella<br>trichopoda    | Phytozome<br>12<br>evm_27.mod<br>el.AmTr_v1.0<br>_scaffold000<br>44.217 | <p>MLSPRKSENSGTLKSPGSRVSLQGSPSIVNGDEALWTRLREVGLDEETL<br/> KQRDKAALISYITKLESEMFDYQYHMGLLILEKKEWTSKYEQIKASADSA<br/> EDKYKRDQAALLSALAEAEQREENLQRALGVEKECVASIEKALHEMRA<br/> ECAETKVAETKLAEVRCLVEDAQKLLAVETKQHTVEALQTETSWQH<br/> AVAERKLKEVEAREDELRRQQVSLKSEMEAKEKDLLNEKESLRELEKVI<br/> QQGQEKLFEGQTLNQQREQCIKERSDRLSREKEVQAATVKLQEDLEIL<br/> KEEKANLCLTSVALTTREEAIVQREVSIDKKEQELLLQEKLSREQDEIR<br/> RLTIEHQTAIELRESQFEELHEKHKSFEADLGLQRHALDLRDAELKHQE<br/> DLMHKDKHELDLQLSELEEKKELETGLKSLVEKEQSLDAREKKIEMER<br/> NCLEKENQELDVIKKELDVYRNSLENERKQILEEQRKLEVMNNDRKDLL<br/> ALETKLKEEVDNLRAEKVKILAEADNLATEKEKFEKEWEQIDEKREQLQ<br/> KEAEWVAEERMELSKFLKTEHEILNLEKDSLREQAKRDADSLCREREAF<br/> LSEMEHGHSEWFTRIQRERADVFVDIEMQKREFQKGVDKRNEEIQRY<br/> LRERDDTFQLERLREFQYIDAQKELVRKELEGISLEMKKLENERKNIALD<br/> REQRDKEWSELKKDIEELQVQREKLKEQRELLHQDREDILKRIEDLKKLE<br/> DLKVPSETLMLPEMQSTGLNLNEVKTPANYLVGPCATKAAVEVHADE<br/> CNENANIGAKSELLEQKESDSVPTPKSWLKRCAEKLFNSTLEKIVVAS<br/> NNNYETHFSRHKETGGPLSFLRQKSHRTDARRVKTFSLSRSTRPVPD<br/> EKNVLEGLPLVREEKDHLQEFDAETNVSANGSCNIKSSVFDSEARAQTS<br/> ANNNGECEFLYGRKRSRGYTSIEDADAQFSRKQSKRQQQAPTAEHPR<br/> MGTSAELLVHSPVVHPEGANGLKPCSHIPDVREVVDGGPSNGPAKVR<br/> GEEGEASGIVLEGLNNSKDALESQTSIDIEGEKAYEVATQPHDNGVLA<br/> AKFDEQIGANSSSPEVTGWTFVMPALFIFAIEAIKVLTLNLSLWHRFACA<br/> DGNLIDVPSGAVALPF</p> |
| Bdi1 | Brachypodium<br>distachyon | Phytozome<br>12<br>Bradi3g5304<br>7.1                                   | <p>MFTPQGGKGTGWSTPAPANQRGGGGAPPASAPLGKAKGTSQRAAE<br/> LEEELHEYQYNMGLLIEKKEWAAKLDEVSHVLAQKEEILKREQAAHLN<br/> AISEYERREESTRKALGVEKQCVADLEKALREIRSEIAEVKFMSQKKITDA<br/> QSLEANLEEKSLIEGKLHAADARLAEANRKKSQADRDLVEEARQRRR<br/> EKEKIYFETERKAREKQLREQEESLQDWEKLLKESQNRLVDLQRSVNER<br/> EERANENDKLCMKQEELDAAKKTVESAKLTLTKDDDITKRLIELGSKE<br/> KDAESKRKLEERERMLSEREERSAREKVLQKLEDQKVKLESKRRD<br/> FELELESERTSFAEKMKQREVDLVKREKDLRSWEDKISKSEQALNESKK<br/> TLEELQNDLSTKSKALKNWEESLKKKEKLLQKLMQDNERKQAEAMYK<br/> SDIEKMKATIEAEKEKILEEQNNLKVTEDEDERQEHNLLSAQLKKEIDEYRM<br/> RSNSLSEETEDLRKQRQKFEEWEQLDEKRARLEEEAKMLNNERVNL<br/> RWRDNEDKRLKDIQDEMDAKYKEQHDKLALKEKALVDDIKHQRDEID</p>                                                                                                                                                                                                                                                                                                                                                                                                                                                                                                                                                                                                                                                    |



|       |                            |                                       |                                                                                                                                                                                                                                                                                                                                                                                                                                                                                                                                                                                                                                                                                                                                                                                                                                                                                                                                                                                                                                                                                                                 |
|-------|----------------------------|---------------------------------------|-----------------------------------------------------------------------------------------------------------------------------------------------------------------------------------------------------------------------------------------------------------------------------------------------------------------------------------------------------------------------------------------------------------------------------------------------------------------------------------------------------------------------------------------------------------------------------------------------------------------------------------------------------------------------------------------------------------------------------------------------------------------------------------------------------------------------------------------------------------------------------------------------------------------------------------------------------------------------------------------------------------------------------------------------------------------------------------------------------------------|
|       |                            |                                       | EFLKRERADLQRNLQLHRHELDMEMENRLADRERELEEKGNELRNKM<br>DFVENKINHAVTLNESKIQKIVLEKQQLQREREILAEKQKLETDKADIR<br>RDIDSLNVLSKSLKDRREAYNRDRNNLIDMFKEYKVKCKSCGNSLSEGF<br>DLSFKDNANFDYPSLAAEEDDCSPNTDTLAQDAGTLVNSAGRFSLLQK<br>CSRLFKFSPRKKAEQSSEQEVEKNIPFGARLEEASPSDEDFEPTPVYQVA<br>NNSFGAENLHSDSGARGDEESERLDLADGAADDVQMESSVGVADNC<br>IDNHGTQSFVTDNDMGVDTTIASVDQNGKDSIAPPEVDLLPETSQKG<br>RRQPNRKGRAKGVRRTNSVRAVVEDAKVILGENFDEKNDGQEDSATV<br>GGTRKRRFAGAAISEQDEEGSEAQSESVSLGGHRRRRRAGPSTQAPVE<br>KRYNLRRATVATVAPTIPTDKKKAPKTRRKQTVEATADDTEGTSKAEPP<br>TTVSKGASESADGASQLQEFQSQAEGDAHTPAEEGTGEEYGDVVDGK<br>DALPVPAMPMPGSELGPEDEDEDEDDSERGNRSIGKSLWSFFTT                                                                                                                                                                                                                                                                                                                                                                                                                                                                         |
| Bdi2  | Brachypodium<br>distachyon | Phytozome<br>12<br>Bradi2g5099<br>0.1 | MASPRSPVGGAAAGDETIWKKLSEAGFDEESVRRRDKAALIAYISRLS<br>EYDYQHNLGLVLLERKELTLKHEQLRASSESAEIMYKRERASQQSALAE<br>ARKREENLKKSLGIQKEFVANLEKALHDMRGETAETKNSYETKLAELK<br>MMDSAQKKLDEAEELFAAKSLEIESTRVHNTALRSLQDLEDREDQLR<br>RYRISNELVYEAKEKDISLQRKSLNDTKKILHDKEQVLLTEQTLNQRDE<br>NILERLTFVTQSEKRLEEDRLILESERMVLMERNLVLKMEGIASREEA<br>IIQKETLLDKRESELLIFQETIANKERAIEDRLNQEHEMALERRKLECETEI<br>ENKRLAYEAEMEEKITLLDQRERALSEQELAFQAQREQNVDLRLAELAS<br>MEEALSGRSGQLKVEEGKLLSHRETVHIELQKEREIEIQMKMLDLEKEKV<br>FFEEEKQDAIQAAQNLAITQADRDDLTLQMKLKEEIDNLRAQKKELM<br>ADADRLQGEKERFEIEWELIDEKKEELQKEAARISEERRLITEHLKSESDV<br>IKQEKEKLRAQFRNNSSETLSREHEEFMSKMQRHASWLSTIQLEREDLT<br>RDIDNQRMELLNSAKAKQMEIDSYLREEREEFEQKKSKELEYINSQKDT<br>INSKLEHAALELQKLEDERKDAALEREKREQELSEIKTTIEALNNQREKLQ<br>EQRKLLHSDREAITEIQQLNVLEELKTDSENKQLCLTECGKSKMNDN<br>GLPPGEDHHATPKNCSSPKLLERKLEVSPSVSTPISWVRKYAQVIFKRSP<br>EKSADHSDNILHNGLPKNLQKAVDINGSHADQLANGAGEVPQDFD<br>GAKVGGKRRHYLVSCDQSDVLEPRRKHQRSTIQKVIRGEITSNCPSVLEE<br>KCSKNEHDAIQLGLSEYGNKGAQNLRLPVDPASSDDLAFANGKADHS<br>GFVDDDETSEEITVCATEQTSGYAIERRDEQDKDVDEDDTDEEEEELEE<br>EKTSSAKKLWRFLLIT |
| Bra11 | Brassica rapa              | Phytozome<br>12<br>Brara.B0170<br>7.1 | MSSTPLKVVQRWSTTPAKGPDMMVTAVTGRVSEIQYEDDPRRLLSELO<br>KELFEYQHSMGLLLLEKKEWSSKFEELQLEFEDANECLRRERNAHLVA<br>MADVEKREEGLKKALGVEKQCALDLEKALRELRSNAEIKFTADSKLTE<br>ADALVRSVEEKSLEVEAKLRAVDARLAEVSRKSSEVERKSKEVEARESSL<br>QRERFAYIAEREADEATLSKQREDLREWKRKQEGEERVAKSQMIVKQ<br>REDRATESDKIVKQKQKGELEEAQKKIDADNLALKKKEDDITSRIKALTKE<br>QETDVLKKSLETKERELLSMQEKLDAREKVEVQQLIHEQQAKLEATQRE<br>FELEMEQKRKSIDDSLRSKVAEVEKRAAEWKHMEEKVAKREQALDRKL<br>EKHKEKEKDFEARLKGIGREKALKSEEKALETEKRKLAEDKENILNLIAE<br>VEKIKAEENVQLSEIRKEKEELRVTEEERSGYLRLQTELKEQIEKCRSQQE<br>LLSKEVEDLKAQRECFEKEWEELDERKAEIESELKNITDEKAKLERNNHL<br>EEERLKKEHQAADDNMKRELETLEVAKASFAATMEHERSVIYKKAESE<br>RSQLLHDIEMLRKLEADMQSKLEERERELQAKEKLFEEEREKELSNINY<br>LRDLARREMTDVQIDRQRIEIEKLETDASKRHLEEQQTEIRKDVDDLVA<br>LTKKLKEQREQFISERNFLSSMESNRNCNHCCELLSELTPDIDNLEMP<br>NLSKLVENEAPQQEMRDISPTATSLGLPDPNGTVSWLRKCTSKILKLSPI<br>KMGETSATLNFSDQEPQSTEQANVNSGPSTMLQVQSESLTREVEVAN<br>ANSDGDQSNINSKAQEVDDADSLSNPNGDQSRTRGGKARVRRTRSV                                                                                                                               |

|        |               |                                       |                                                                                                                                                                                                                                                                                                                                                                                                                                                                                                                                                                                                                                                                                                                                                                                                                                                                                                                                                                                                                                                                                                                                                                                                                |
|--------|---------------|---------------------------------------|----------------------------------------------------------------------------------------------------------------------------------------------------------------------------------------------------------------------------------------------------------------------------------------------------------------------------------------------------------------------------------------------------------------------------------------------------------------------------------------------------------------------------------------------------------------------------------------------------------------------------------------------------------------------------------------------------------------------------------------------------------------------------------------------------------------------------------------------------------------------------------------------------------------------------------------------------------------------------------------------------------------------------------------------------------------------------------------------------------------------------------------------------------------------------------------------------------------|
|        |               |                                       | KAVVEDAKAIYGKSIELSEPVDSTENVEDNAKGNDESTDEPGRSDKGRAS<br>KNGRKRGRMGSLQTCTTEQDGNESDGKSDSVTGGGERQGRKRRHKVA<br>SEKQEEVVGQRYNLRSTRVAGKTALGKKNEETGGVQQEEGIYCAQT<br>TATASVGV AISDDNGVSTNVVEREAMADCEDTDAGSAKRIGESQEMS<br>EEDVNKTPQRADSGNEYDGEEDSESEHPGKVSISKKLWTFLLT                                                                                                                                                                                                                                                                                                                                                                                                                                                                                                                                                                                                                                                                                                                                                                                                                                                                                                                                                     |
| Bra1II | Brassica rapa | Phytozome<br>12<br>Brara.G0269<br>2.1 | MSTPLKVVQRWSTPTKATNPDSNGKVSGMVSEIQYEDDPRRLPDRV<br>SELEKELFEYQHNMGLLLEKKEWSSKFEELQDEFDEANQCLKRERNA<br>HMVAMADVEKREEGLRKALGIEKQCALDLEKALRELSENAEIKFTADS<br>KLMEANALVRSVEEKSLVEAKLRAVDARLAEVSRKSSEVERRSKDVEA<br>RESSLQRFERFSHITEREAEEASLTQREDLREWERKLQEGEERVAKSQM<br>MVKQREDRANESDKIHKQKGELEEAQKKIDAANFALKKKEDDISSRIK<br>ALALREQETDLLKSIETKERELLALQEKLDAEKVAVQQLVDEHKAKLE<br>AAEREFEMEMEQKRKSIDSLRSKVAEVEKREAEWKHMEEKVAKREQ<br>ALDKLEKHKEKDFESRLKGVGTGREKALKSEEKALETDKRKLAEDKEN<br>ILSLIAEVEKIKAEVHLSEIRKEKEELKVTEERSEYLRQLTELKEQIEK<br>RSQQELLSKEVEDLKAQRECFEKEWEELDEKKAIEITELKNLADQKEKLE<br>RNTHLEERLRKEKQEAIDNMKREVETLEVAKAAFADTMEHERSVISKK<br>AESERSQLLHEIEMLRKLESDMQSKLEERERELQAKEKLFEEEREKELS<br>NINYLRDVARREMTQSDRQRIQKEKVEIDASKKILEEQTEIRKDVD<br>DLVALTKKLKEQREQFISERNRFLSSMESNRNCSNPGELLAALPEIDNL<br>ELPNLSKLENILQDEAPRQELKDISPTATDLGLPVQGGTVSWLRKCTSKI<br>LKLSPKIMADTSAPFDQEPQSTEQGNVNSGPSTMLPAQSENDTREVE<br>VSDGDQSNIDSKAQEVAADSLSNLNADGQSRLRGKARIRRTSVKAVV<br>EDAKAIYGKSI EFNEADDGSMGEPGRSDKGGVSKNGRKRGRVGLSRT<br>CTSEQDGNESDGKSDSVTGGEGHQGRKRRQKVASEEQEVVGQRYNLR<br>RSRRVAGKTAIGKKNEEADGVQQQEEGVHCAQT TATASVGVAVSDN<br>GVTANVVEIEGMADSEETDAGSPKRTGENAAASEEDVNRTPEREYDG<br>EEEDSDTEHPGNV SIGKKLWTFLLT |
| Bra2   | Brassica rapa | Phytozome<br>12<br>Brara.I00831<br>.1 | MATSSSERVPRTPATRLAITPGSRVLKSPISEEVMWKRLEAGFDEQ<br>SIKKRDKAALIAYIAKLESEVYDYQHNMGLLIMEKDDLLSKYEEVKSSVD<br>EADLAHRRDLSAYVSALAEAKKREESLKKDVGVAKECISSLEKTVEHIRA<br>ECAETKVS AESKLSEGHSMIEDALKKFADAEAKMRAAEALQAEANRYH<br>RIAERKLKEVESREDDLARRLASFKSESETERESEIVIERQTLSERRKSLQQE<br>HERLLDAQASLNQREDHIFGKSQELAELOKGLSAKSTFEERRAFEDR<br>KSNLEIELASLAKREEAVSERESSLRKKEQELLVAEEKIATKESELIQKVL<br>NQEVILRKRKSDVEAELESKYKAVEDEIESKRRAWELREVDIRQREDLV<br>GEKEHDLVQSRALAEKEKDITERSYNLNEKEKHLNLEEDINRKTALLE<br>DEKDRLRKLDLQQLISLEDKRRKRVDSATEKLEALKSETSELSILELNLK<br>EELDDLGRGQKHELLVEADRLKVEKAKFEAEWEHIDVKREELRKEAEYITR<br>QREAFSMYKDERDNIREERDALRNQHKNDVEALNREEREFMNMKMV<br>EEHSEWLSKIQRERADFLGIESQKRELEYCIENKREELNASREREKAFE<br>QEKKLEERIQLKESAKKELEQVQVELKRLDVERLEIKLDRERRERWA<br>ELKDSVEELKVQREKLEKQRHMLRSEREEIRHEIEELKLENLKVALLDDM<br>SMAKMQLSNLERSWEKVSALKQKVELQNGVSTVSNSEDGYDNSSME<br>RQNNGSSPSSAAPLSWIKRYTNRIFKTSPEKSPPMHHEERGLPS<br>EKMKLDSSKAYTEGMSIAVERLEAGRKRGRGNASGNDSTGPSSNKKRK<br>HDVTQKSPDADPESVISSPRNVPEDKHELPPSQAETPSGMVVISSETVKI<br>TKVTCETEVIKVTNIDCSENPSEAGTKMVEERKQDSDCNQTTEINVPE<br>TVTQKEVESDNREEKDSSEGGIVT                                                                                           |
| Bra3I  | Brassica rapa | Phytozome<br>12                       | MFTPQRNQFPATDRKGKAVAFAD EITTPSPPMRSRFGSLSAVDDWRRF<br>KDVGLLDEASLERKDLEALIEKNLKELELFDYQHNMGLLIEKKKWTSR                                                                                                                                                                                                                                                                                                                                                                                                                                                                                                                                                                                                                                                                                                                                                                                                                                                                                                                                                                                                                                                                                                          |

|        |                            |                                         |                                                                                                                                                                                                                                                                                                                                                                                                                                                                                                                                                                                                                                                                                                                                                                                                                                                                                                                                                                                                                                                                                                                                                                                                                                                                                                        |
|--------|----------------------------|-----------------------------------------|--------------------------------------------------------------------------------------------------------------------------------------------------------------------------------------------------------------------------------------------------------------------------------------------------------------------------------------------------------------------------------------------------------------------------------------------------------------------------------------------------------------------------------------------------------------------------------------------------------------------------------------------------------------------------------------------------------------------------------------------------------------------------------------------------------------------------------------------------------------------------------------------------------------------------------------------------------------------------------------------------------------------------------------------------------------------------------------------------------------------------------------------------------------------------------------------------------------------------------------------------------------------------------------------------------|
|        |                            | Brara.B0181<br>4.1                      | NEELQQAFDEVNEILKRERTSSLIALSESEKREENLRRALISEKQFVAELE<br>RDFKYLQQEHTEVKSTSEAKLAEANALVMGIKEKALEVDKERAVAEKLE<br>SVISRKSELERKLDVETREKVLQRERLSLATEREAHEAVFYKQREDLQ<br>EWEKLTVEEDRLSEVKRSINHTEERSIESERAIIKKKESLEEMQRKIDTA<br>KSELKEREESVNKMLNDLSMKEKDFEAMKTKVDMKEKELHELEEKLVV<br>REQMEIGKLEDQKGVLD SRMQEFETELEQRRISLDEELEKRRGEIEKL<br>QVEIGLKEEQLGKREAALEKMEERMKEKEKDLEARLEAVKEKEKALRTE<br>EKKLHVENERLLEDKESLRKLEEIEEIGAETTKQESRIREECESLRITKEER<br>LEFIRQQSELKQQIDRVKQEGELLKEREELKQDQGRFEKEWEALDEKK<br>ADIAREQKEVAEEKEKLRSLQISRVLDDVKMKKESLEGKVTINENISCTK<br>KLALKEMEELESEKLALQRERDEISVEKKQLKLDHDELYKDVADVDALRI<br>SLKEQRDDLYRSKDRFAVLLKKVDLCSTCRIPFHKFINSERVPDLEDGND<br>RKSTSFIGKLASAMAPESSLPDDSLDTAAGNDHEPSASFSESKGAEVSL<br>QSEIKSDKPRRGRGRGKSVRGRSQATSDSKPSDVKLPRKRQREQGSRIT<br>ESEQADGDSDEGVDSVTTGGRKKKRQTAVPVSLAPAQSRYLRRHRN<br>VGTEEDKAQESTGAVEKQENVNGDIRTVSPKDSFKENGKAETLAETL<br>THEEIVKVEETEFKDKSTGKRPVQEDPQLEAGGSGEGKEHGGEEDDG<br>TFSIIQEENEQEDAETHPGEASIGKKIWWFFTT                                                                                                                                                                                                                                                                                                                                  |
| Bra3II | Brassica rapa              | Phytozome<br>12<br>Brara.F00805<br>.1   | MFTPQRKQWMSAMTPRSETRVTNPRNADRKGKAI AFSEDPVNSTL<br>PPPIRTLTGEGFSRGEADDMDMGDWRRRFREVGLLDEASMERKDRE<br>ALLEKISTLEKELYGYQHNMGLLLMENKEWASKHEQLDQALLEAQEILK<br>REQSSHLYALTVEQREENLRKALGLEKQCVEELEKALREMQEENKNT<br>RLASEAKLAEANALVASVTGRSSDVESKIYSAESKLAETRKSSSELMRL<br>KEVETRERVLQQRLSFAKERESYEETFHKQRDYLHEWEKKLQEKEES<br>MPEQKRSLNHREEKVNEKEKNLKLKAKELEERERKIALSMSKCKETEED<br>LNKRLQELTAKEKESCTLQSMMLAKERELRALEEKLIAREGTEIQLIDD<br>QKAELADKMLAFEQECEERRKSLDKELQRKTEEVERQRVEIDHGEEKL<br>QQRNQAALNKKFERVTEKEMDLEAKSKAIREKEKDIQAEKRLSLEKQQL<br>LSDKESLMDLQQEIENIRSEMMKKEDAIREELKNLEIKKGEREYQRLQ<br>SELKSQIEKSRLEHEEFLSKEVENLKQEKERFEKEWEILDEKQAEYNKERM<br>RISEEKAKLERFEMLERERLKKESAFRVQIKQELDDIRLQRESFEANME<br>HERSALHEKAKLEHSKALDDLETMRRNLEIEQQKRKEEDEKALQDRLS<br>QFEDKRMKELSDINRRKQALNREMEEMVSKRGALQKESEEIAKHKEKL<br>KEQQAEMHNDISELSTLSINLKKRREEFARERGRFLAFVQKLDCESCG<br>QLANEFVLSDLQLPYNEEEAIPPPNGVSDLPESSESDSCNINKSLDRD<br>ASGSGRRPNMSILQKCTSILFSPSKRAEHDMDTGKPEQRPSSSLAVNKE<br>TKGEKPLPVSTIPDEDEEYTD SRVQETSECSQFSELQSARRGRGRGRPR<br>KPKPSTNPTSSANHASPGESSKGEVSGHVSGTSEKTTGRGGRKRQHT<br>DTAAGGRRRKRQQTAVLPQTPGQKRYNLRNKTVDQVPANVEND<br>AAGGEDDADIAASAPSKDNVEGTSESVEPLRARRLESSEVRVERVVT<br>VETTTATANTNVGVSVANTEVAANIAMS PVEDDQTQRTVNEDKNEE<br>YEDGNDEEDYEEQEDDDDDDDGDDDDDDGDDDDDDGGSPRPGEGSI<br>RKKLWTFLLT |
| Brst1  | Brachypodium<br>sylvaticum | Phytozome<br>12<br>Brast04G088<br>000.1 | MFTPQGGKGTGWSTPAPANQRGGGGAPPASAPLGKAKGTSQRAAE<br>LEEELHEYQYNMGLLIEKKEWAAKLDEVSQVLTQKEEILKREQAAHLN<br>AISEYERREESTRKALGVEKQCVADLEKALREIRSEIAEVKFTSQKKIADA<br>QSLEANLEEKSLIEGKLHAADAKLAEANRKKSQADRDL EEVEARQRR<br>EKEKIYFETERKAREKQLREQEESLQDWEKKLKESQNRVLDLQRSVNER<br>EERANENDKLCMKQEELAAKKTVERTKIMLTKEDDITKRRIELGSKE<br>KDAESKCKILED RERMLSEREEKVGAREKVG LQKLEDQKVKLESKRRD<br>FELELESERTSFAEKMKQREVDLVKREKDLRSWEDKISKSEQALNESKK                                                                                                                                                                                                                                                                                                                                                                                                                                                                                                                                                                                                                                                                                                                                                                                                                                                                        |

|       |                            |                                           |                                                                                                                                                                                                                                                                                                                                                                                                                                                                                                                                                                                                                                                                                                                                                                                                                                                                                                                                                                                                                                                                                                                                                    |
|-------|----------------------------|-------------------------------------------|----------------------------------------------------------------------------------------------------------------------------------------------------------------------------------------------------------------------------------------------------------------------------------------------------------------------------------------------------------------------------------------------------------------------------------------------------------------------------------------------------------------------------------------------------------------------------------------------------------------------------------------------------------------------------------------------------------------------------------------------------------------------------------------------------------------------------------------------------------------------------------------------------------------------------------------------------------------------------------------------------------------------------------------------------------------------------------------------------------------------------------------------------|
|       |                            |                                           | <p>TLEELQNDLSTKSKALKNWEESLKKEEKLLLEEKQMDNERKQAEMYK<br/> SDIEKMKTTIQAEKEKILEEQNNLKVTEERQEHNLLSAQLKKEIDEYRM<br/> RSNSLSEETEDLRKQRQKFEEWEQLDEKRARLEEEAKMLNNERVLE<br/> RLRDNEDKRLKDLQDEMNAKYKEQDEKLVLKEKALMDDIKHQREEIDE<br/> FLKRERADLQRNLQLHRHELDMEMENRVAGRERQLEEKENELNNKM<br/> DFVENKIEHAVRLNESKIQKIVLEKQKLQMEKEILVEEKQKLETDKADIR<br/> RDIDSLNALSLSLKVRRAYNRDRNNLIDMFEKYKVKCSGSLSEGFDD<br/> LSFKDNADFDYPSLAAEEDDCSPNTNTLAQDTGTLVHSAGRFSLLQKCS<br/> RLFKFSRKKAEQSSEQEVEKNIPFGARLEEASPSDEDFEPTPVYQVAN<br/> NSFGAEDLPSDSGARGNEESERLDLADGAADDVQMESSVGVADNCID<br/> IHGTQSFVDVTNDMAVDTTVASVDQNGKDSIAPLEVDLLPETSQKQWR<br/> QPNRKGRAKGVRRTNSVRAVVEDAKAILGENFDEKNDGQEDSATVG<br/> GTRKRRFTGAAISEQDEEGSEAQSESVSLGGQRRRKRAGPSTQAPVEK<br/> RYNLRRATVATAAPSVPTDKKKAPKTRRKQTIEATADDTEGTSKVEKPT<br/> TVSKGASESADVASQLQEFVSQVEAGDAHAPAEEGTVEEYGDVVDGQ<br/> DALPDAMPMTPSGSELGAEDDDEDEDDEDDSERQNRSIGKSLWSFTT</p>                                                                                                                                                                                                                                                        |
| Brst2 | Brachypodium<br>sylvaticum | Phytozome<br>12<br>Brast01G134<br>300.1   | <p>MASPRSPVGGAAAGDEAIWSKLREAGFDEESVRRRDKAALIAYISRLES<br/> EIYDYQHNLGLVLLERKELTLKNEHLRASSESAEIMYKRERASQQSALAE<br/> ARKREENLKKSVGIQKEFVANLEKALHDMRGETAEIKISYETKLAELQ<br/> MMDSAQKKLDEAEKLIAAKSLEVSTRVHSTALRSLQDLEDREDQLR<br/> RYRISTELEYEAKEKDVSLQRKSLNDTKKILHEKELVLLKEQALLNQRDEN<br/> ILERLTFVTQSEKRLEEDRLILESERMVLMEEERNLVLKMEGIASREEAII<br/> QKETLLDKRESELLIFQETIANKERAEIDRLNQEHEMALERRKLECETEIE<br/> NKRLAYEAEMEAKVTLTDQRERALSEQELAFQREQNVDLQLAELASK<br/> EEALSGRSDLLKVEEEKLLSHREAVHIELQKERDEIQMKMLDLEKEKVLFE<br/> EEKQEAIIHAQQNLAITQADRDDLQMLKKEEIDNLRAQKKELMADA<br/> DRLQAEKERFEIEWELIDEKKEELQKEAARISEERRLITEHLKSESDVIKQE<br/> KEKLRAQFKNNSETLSREHEEFMSKMQQEHASWLSKIQLEREDLTRDI<br/> DNQRMELLNSAKAKQMEIDSYLKEREFEQKKSKELDYINSQKDMIN<br/> SKLEHAVLELQKLEDERKDAALEREKREQELSEIKTTIEALNNQREKLQE<br/> QRKLLHSDREAITEIQQLNVLEELKIDSENKQLCLTECGSKMNDNGL<br/> PPGEDHHATPKNCSSPKLLERKLEVSPSVSTPISWVRKCAQVIFKRSPEK<br/> SADHDRDSILHNGVPKNLQKAVDINGSHADQLANGAGEVPQVFGGA<br/> KVGKKRQYLVSCDQSDVVEPTRKHQRSTITSNCPSVLEEKCSKNEHDAI<br/> PLGLSEYGNKGAQNLRLPADPASSDLSFANGKADHSGFVDDDETSEE<br/> ISVSATEQTSGCAIERRDEQDKDVDEEDTDDDEEKELEEEKTSSAKKLWR<br/> FLIT</p> |
| Bst1  | Boechera stricta           | Phytozome<br>12<br>Bostr.26959s<br>0186.1 | <p>MTTPLKVVQRWSTPTKATNPDSNGSSHGKGLDMVTPVSGRVSEIRF<br/> DDPRILPEKISELEKELFEYQHNMGLLLIEKKEWSSKYEELQQAFEEANE<br/> CLKRERNSHLIAIADVEKREEGLRKALGIEKQCALDLEKALRELRSENAEI<br/> KFTADSKLTEANALVRSVEEKSLEVEAKLRAVDARLAEVSRKSSEVERKA<br/> KEVEARESSIQRERFSYIAEREADEAILSQREDLREWERKLOQEGEERVA<br/> KSQMIVKQREDRANENDKIIKQKGKELEEAQKKIDVANLAVKKLEDNV<br/> SLRIKDLALREQETDVLKKSJETKARELQALQEKEAREKMAVQQLIDEH<br/> QAKLDATQREFELEMEQKRKSIDDSLKSKVVEVEKREAEWKHMEEKV<br/> VKREQALDRKLEKHKEKEKDFDLRLKGVNGREKVLKSEEKALETERRKLL<br/> EDKEIILNLKAEVEKIRAENEVQLSEIHKEKERLRVTEERSEYLRQLTELK<br/> EQIEKCRSQQELLLKEAEDLKAQRESFEKEWEELDERKAKIENELKNIAD<br/> QKEKLERHSHLEERLKKKQAAENMQRELEALEVAKASFAETMEHE<br/> RSMLSTKAESERSQLLHEIEMRKRKLESMDMQTKLEERERELQAKEKLF<br/> EEREKELSNINYLRDVARREMADAQNERHRIEKEKLEVDASKNHLEEQ</p>                                                                                                                                                                                                                                                                                                                                                  |

|       |                  |                                           |                                                                                                                                                                                                                                                                                                                                                                                                                                                                                                                                                                                                                                                                                                                                                                                                                                                                                                                                                                                                                                                                                                                                                                       |
|-------|------------------|-------------------------------------------|-----------------------------------------------------------------------------------------------------------------------------------------------------------------------------------------------------------------------------------------------------------------------------------------------------------------------------------------------------------------------------------------------------------------------------------------------------------------------------------------------------------------------------------------------------------------------------------------------------------------------------------------------------------------------------------------------------------------------------------------------------------------------------------------------------------------------------------------------------------------------------------------------------------------------------------------------------------------------------------------------------------------------------------------------------------------------------------------------------------------------------------------------------------------------|
|       |                  |                                           | <p>QTEIRKDVDDLVALTKKLKEQREQFISERNRFLSSMESNRNCNPGCELL<br/> SELVLPEIDNVEMPNNMSKLANILDKEAPRQEIRDISPTATGLGLPVAGG<br/> TVSWLRKCTSKILKLSPIKMTEPSVTWNLADQETQATYQANVNSGPST<br/> TPQAATNYSFDVQKAESSETGTKEVEVTNVNSDGDQSNINSKAQEVAA<br/> DLSLNQNADGQSPMRGKKGARTRRRSVKDVVDDAKAIYGESIDLCE<br/> PNDSTENVDDSAKANDGSTGEPGRSDKATSKNGRKRGRVGLRGTCTT<br/> EQDGNESDGKSDSVTGGVHQRKRRQKVASEQQGEVVGQRYNLRPR<br/> RVTGETTLSKKKEETGGVQQDEVVYCAQTTATASVGVAVSDNGVSTN<br/> VVQHEATADSQDTDAGSPKRTGESEAMSEDEVNKTPQRVDSGDGEDDE<br/> SDAHPGKVSIGKKLWTFLLT</p>                                                                                                                                                                                                                                                                                                                                                                                                                                                                                                                                                                                                                                         |
| Bst2  | Boechera stricta | Phytozome<br>12<br>Bostr.0568s0<br>208.1  | <p>MATSSSERFPITPSTAATNRLTITPNSRVLKSPLTEEVMWKRLEAGFD<br/> EQSIKKRDKAALIAYIAKLESEVYDYQHNMGLLLEKNELLSKYEEVKASV<br/> DDADLAHRRDQSAVVSALAEAKKREENLKKDVGVARCISSEKTLHE<br/> MRAECAETKVSAGSKMSEAHIMIEDALKKYADAESKMRAAEALQAEA<br/> NRYHRIAERKLKEVESREDDLTRRLASFKSESETKENEMIIERQTLNERRT<br/> SLQQEHERLLDAQVSLNQREEHIFTRSQELAEFEKGLSESAKTTFFEEERKA<br/> FEDKKSNEIALALLAKREEAVSERESSLLKKEHELLVAEEDIASKESELIQ<br/> NVLANQEVILRKRKSDVEAELECKSKLVEDEIESKRRRAWELMEVDIKQR<br/> EDLVGEKEHELEVQSRALAEKEKDITEKSYNLEEKEKNLIATEEDNNLKT<br/> TLENEKERLRKLDLDLQQLISLEDKRRKRVDSATEKLEALKSETSELSTLE<br/> MKLKEELDDLRAQKLEMLAEADRLKVEKAKFEAEWEHIDVKREELRKE<br/> AEYITRQREAFSMYKDERDNIKEERDALRNQHKNDVDSLQEREFF<br/> MNKMVEEHSEWLSKIQRERADFLGIEMQKRELEYCIENKRELENS<br/> REREKAFEQEKLEERIQLKETAKEKELEHVQVELKRLDAERLEIKLDRE<br/> RREREWADLKDSVEELKVQREKLETQRHMLRAEREDIRHEIEELKLEN<br/> LKVALDDMSMAKMQLSNLERSWEKVSALKQKVVSRDDELQNGVS<br/> TVSNSEVGYNSSMERQNGSTPSSATPFSWIKRCTNLIKTSPEKSPLMH<br/> QHEEGELPSEKLLDSSKRVEKAYTEGLSIAVERLEAGRKRGRGNASGN<br/> DTSEPSNKKRKHVDVTQKSSDEADTQSVISIPQNPEDKHELPSSQTQ<br/> TPSGMVVISETVKITTVCETEVTNKVTTLDCSENPTAAGRNMGEEKPD<br/> SDCNQIGINTSGTVNRKEAESEKDLDDGGIVT</p> |
| Bst31 | Boechera stricta | Phytozome<br>12<br>Bostr.26959s<br>0008.1 | <p>MEMFTRQKYRWPETDQKGAIAFADETTTPSTPRGPLEREDDWRKF<br/> KEVGLLDEASLERKDRDALIEKILKLEKELFDYQHNMGLLLIEKKWTST<br/> NEELQQAFDEAMEILKRERTSNLIALNEADKREENLRKALIAEKQFVAEL<br/> EKDLKYWQQEHSEVKSTSEAKLAEADALVMGMKEKALEVDRERIAIE<br/> EKLSVINRKSSELERKLKEVETREKMHQREHLSLVTREAEHEAVFYKQRE<br/> DLQDWEKLLTLEEDRLSEAKRSISRDERIMESERTIKKKEKVL EEMQQ<br/> KIDIAKSELREERESINIMLNDISKKEKDFEAMKAKVDIKEKELHEFEELI<br/> VREQMEIGKLLDDQKAVQDSRRQEFEMELEQMRKSLDEELEGKKAIE<br/> HLQVEISHKEGKLAKREAALKMEERVKEKDKLEARLKAVKEKEKSLK<br/> AEEKLHLENERLLEDKECLRLKDEIEEIGAETTKQESRILEEHESLRITKE<br/> ERLEFLRLQSELKQIDRVKQEEELLLKELEELKQDKERFEKEWEALDEK<br/> KADIARKQKEVTEEKEKLRRLQISEKHRLKREEMTSRDDLRDLGVMK<br/> QKESLEADMESKKIALHENAKNKTSLIEDLEKQRNLDMEQRQEEE<br/> GERDFNERARTYEKRSQEELNINITYKLAQREMEEVQYEKLALERERE<br/> QISIQKLLKEQDVEIHKDIIELDVLRSLLKEQREEFIRAREGFLVLEKLS<br/> CSSCGEITEKFVLSDLRPLDVEDGDKLFGIRKLAEEAFNISPASNSRKT<br/> SLLGKIASKLMSISPIGKTDKVTDLGITVKLPESLQPD TLDIVPGNDHEP<br/> SATEQSFTNSIIQEGPEVSLQSEIKSDKPRRGRGRGKSVRGRSQATKAA<br/> SKDSKPSDVEIPRKRQREQASKVTESEHTAADSDEGVDSITGGRRKKR<br/> QTAVPVSQTPGQSRYLHRRHRNVGTEEDKAQASTGATEKQESVNGDI</p>                                    |

|        |                          |                                                                      |                                                                                                                                                                                                                                                                                                                                                                                                                                                                                                                                                                                                                                                                                                                                                                                                                                                                                                                                                                                                                                                                                                                                                                                                                          |
|--------|--------------------------|----------------------------------------------------------------------|--------------------------------------------------------------------------------------------------------------------------------------------------------------------------------------------------------------------------------------------------------------------------------------------------------------------------------------------------------------------------------------------------------------------------------------------------------------------------------------------------------------------------------------------------------------------------------------------------------------------------------------------------------------------------------------------------------------------------------------------------------------------------------------------------------------------------------------------------------------------------------------------------------------------------------------------------------------------------------------------------------------------------------------------------------------------------------------------------------------------------------------------------------------------------------------------------------------------------|
|        |                          |                                                                      | RTVPNPKDTLTPPQGENRENGKAEVLVEAVTHEEIVRIEAETEFKDNM<br>MGKRPVEDPQLETGGSGEIREHGEDDDENFSMIEEENEGEREETERQ<br>GDASIGKKIWWFFTT                                                                                                                                                                                                                                                                                                                                                                                                                                                                                                                                                                                                                                                                                                                                                                                                                                                                                                                                                                                                                                                                                                   |
| Bst3II | Boechera stricta         | Phytozome<br>12<br>Bostr.13671s<br>0124.1                            | MRLQSELKSQIEKSRLHEEFLSKEVENLKQEKERFEKEWEILDEKQAEYN<br>KERLRMSEEKAKFERFQLEGERLKKKEESALRVQIMQELDDIKLQRESFE<br>ANMEHERSALHEKAKLEQSKVIDDLEMMRRNLEIEHQKRKEQDEKDL<br>QERLAQFEDKRMKEISDINHQQALNREMEEMVSKRSALQKEKEEIAK<br>HKEKLKEQQVEMHNDISELSTLSINLKKRREVFARERARFLAFVQKLD<br>CGSCGQLVNEFVLSLQLPYNEEEEAILPPNGVLSNLPGSSDASDSCNIKK<br>SLDGASGSGSRRPNVSILQKCTSILFSPSKRAEHGIDTGKSEQRSSS<br>VAVSMETKGGKPLPIDIRPSSSSSPEEDEDYDTSRVQETSEGSQSEL<br>QSASRGRGRPRKAKPALNPKSLVKYANPEESSKDELSGRVFTSEKTTG<br>GGGRKRQHIEDTATAGHRKRQQTGVLPQTPGQRRYNLRRNRTVDQ<br>VPADVEDNAAGGEDDADIAPSAPSKDNVEETSESVVESLRARRLETSE<br>VRVESVVMVEKIADVTPDNNGDVSVANAAPTANIAMSPSVEDDQK<br>QGTVNEDMNEDGDEEEAQDDDNDEIQDDYDDDDDDGDDDDGSPRP<br>GEGSIRKKLWTFLLT                                                                                                                                                                                                                                                                                                                                                                                                                                                                                                             |
| Bvi    | Botrypus_virgini<br>anus | onekp:<br>BEGM_scaffo<br>Id_2014500<br><br>BEGM_scaffo<br>Id_2014501 | MFTPQRRGWPGWTFPPSGDKKDKGKVLSPFRAPGSNDVSPVKSLIE<br>APPVASLEDNGGILVRSEHEIWRRFRDAGALDENSLEKKDRAALLVHVS<br>NMEAELYDYQYNMGLLLMERKEWDSKHEKLKAAVLEAEENLKRELAA<br>HLIAISEAEKREESLKKALAVEKQCVDLEKALKEMRAEVAELKVTAENK<br>LAQARDMIASTEERSLLAESKLHAAEALEAAARKKADAERKLQVEAR<br>EDAMRRERHSAKAERDAHESELNRERQNLRDWERKLQEGQERLLEG<br>QRLLNQREEHANQRDEALKQLEKDLQDARKHLEKERTVLEQSEADLN<br>ARLATLAVREENAVKQEIYIDKKEQELLLLQEKLASRERSLEMHEQHVK<br>TETFVSKERDRLEALERTMKLKEESLPELEKKAACEEMLAELEKQVAL<br>LEETELENRKASIEAREADMERKDEKITKREQQLEKKSEKLEKEKELD<br>TKTKAAKEKDRSLKSEKQLEAQRMMVAEEREAVKASKEEENLRKELD<br>VEKKLVLEEREKLRVTEQEREDLLKMQTCLKEEIDD CRAQTKTVSIQAE<br>LKKEREKFEREWDILDEKREQVRTELEQAEQEKRRVAKWLQDEEARLK<br>QEKRSLEQISRETEALRLEKEAFVNSVEHERAEWFAKVDKEREDLVRD<br>IDVRKRDLERTMEKRKEEFKQIKERESRHRDTERERQNSSALRALAE<br>KELQDVRQERQKLEKERQEISKNREDSEKDWVEIRKDIEELHIQREKLKE<br>QREALRRERDDILQEAELKLLREELKVADDSLKSEQLSQRNDVEVSP<br>NMGLVSQPLENGAIFERGOASQLPNTGKSPAESTPGKSSGTPGRLSW<br>LQRCASALFHTPDKKLGTLMKVCTESEHEKDLEARTGAEPSNFVYEV<br>DDNKLHRSSVVEEGMPAHQSRSSGSFTPDQLTDGENSQPAVQRWK<br>GKGFTRTRSIRAVVEDAKAILGSYPDAGGDDELPTGNGDEEKVLLAQD<br>VEDEGKQGDSTAPVTIEHDKDNKLNKQGRKRRRQQQSKEALSEQEVE<br>EAETESEVATGGKRKRQRDTGSSMKGEPGKETPGTKRYNFR |
| Cag1   | Cathaya_agryro<br>phylla | onekp:NPRL_<br>scaffold_201<br>6133                                  | MLTPKRRGWPGWSPKTPSPPPPPAEEMAGSSHVVTPAATAGGSSG<br>GRALVEAPPRNLLDNNGEIVATRGQPEIWRRFREAGSLDEESLEKKDR<br>AALVVHVTKLEAELYDYQYNMGLLLIERKEWTSKYEQMQVAITEAEEN<br>LKREQSAHLIAISEAEKREESLKKALGVEKQCVIDLENALHEMRAEMAE<br>LKFTSENKLAQAREFAASTEELKALAAESKLHAAEAALQAEVSRKHAEMER<br>KGQDIEALERTIQRERQSFMSEHDAVEVELSLERQNLLEWEKKLQEGQ<br>ERLIEGQRLLNQREEYINKRDEAMKQIEKELEDAKMQIEKDQATLKEKE<br>ADISSRMAALATREEDVVKGETVINKKEEELHALQEKLVSMENEEIQKLI<br>DDHKATLEARKLEFEAEIEQKKILVEEELQKKRSEIDLMEADISRKEEKISK<br>REQQLEKKAKEKVEKEKEVDARSKALKEREKCTCKNEEKQIETEKKKLEAE<br>REDINNEKQELQNLRIILKEEQQLNAQENLVSEKERNELLKQTELKE                                                                                                                                                                                                                                                                                                                                                                                                                                                                                                                                                                                                                       |

|      |                          |                                     |                                                                                                                                                                                                                                                                                                                                                                                                                                                                                                                                                                                                                                                                                                                                                                                                                                                                                                                                                                                                                                                                                                                                                                                  |
|------|--------------------------|-------------------------------------|----------------------------------------------------------------------------------------------------------------------------------------------------------------------------------------------------------------------------------------------------------------------------------------------------------------------------------------------------------------------------------------------------------------------------------------------------------------------------------------------------------------------------------------------------------------------------------------------------------------------------------------------------------------------------------------------------------------------------------------------------------------------------------------------------------------------------------------------------------------------------------------------------------------------------------------------------------------------------------------------------------------------------------------------------------------------------------------------------------------------------------------------------------------------------------|
|      |                          |                                     | EIEDYRARKQQVENEAEELKLEREFKEWEILDEKREQARKESAQVDE<br>DRKRISKWVLDEEERLKQEKRALREHIQSDSDALHLEKEAFKSSMEHER<br>AEWFENVRRERADLLRDIELQRSELENSIEKREEEIERLLHEKEVEFQKEK<br>EREMQHICEQREVARKEEMEEMKVERRKLEKERHENTESREHAEKQW<br>TEIKKDIEELQVQREKLKEQRQSLCKEREVLRLEFQKLLKAELNVTE<br>HLKQIADKDGSHSPRPADEFGSSQQALGQNFITPGDTSVKVNPEPSS<br>GRDASTSKTSRSLWLQRCASKIFNQSPSPGKVGDNVTWKEEIERSHS<br>PTLEVVLGAEIERMTHENTVGEKVEHVSSADVQNEGCIVEAAEDKRQG<br>HGKPKPRSVVNFNNLPSVSVGNRKSCKAKIRVFRTRSMKAVVEE<br>AKGILESLSMEKNESEDRQEQEQSNAGVTANSEDLGKESDKDKDTDA<br>KEMDESKGESLADKKSSQSGKKRRRKYSSRATSAQDADDADIQSELT<br>SGQRRKKRQRDIANGDNSGVGTPGGKRYNFRSTIASTIAT                                                                                                                                                                                                                                                                                                                                                                                                                                                                                                                                                    |
| Cag2 | Cathaya_agryro<br>phylla | onekp:NPRL_<br>scaffold_201<br>4702 | SPVNEKEMWRRLEAGLDEETLKKKDKAFLLSYITKLESELYDYQCNMG<br>LLLIERKEWTSKCEQMNLANSANAEKFKRERAALSTAIKAEKQEESSKK<br>ALGVEKQCVADEKALHEMRAECAELKFISDNKLAQAHMVAATTEEF<br>LVAESKLHAGEALQAEANRKRADAERKLQVEAREDALRRERRAFKSE<br>CEAREKELVLERQNLRGWDKQLQEGQERLLEGQKFLNQREAHIMERD<br>EALKQIEKELQDVKMNVEKEHSTLKEKEADLRTSLAALMTREEAVVKQ<br>EIIVDRKEQELLVLQEKLASRREEIQRLTDEHKATLEAIRIEFAELEQKR<br>RLVEDELENKENATDLRGLINRREEKLSKRELHLEKKAELKEKENELDS<br>RSRTLKERDKTYKTEEKEMENEKLEMERKEVNNAKQELQKFKASLE<br>DERCQILKEQQRLELTKNERDELDDLQTKLKEIDDLRAQKQELLKEADD<br>LNVEKEKFEREWEILDEKREQLRKELEWVDDERKKVPKVVKDEEERLK<br>QEKIVLREEIKRDAEGLRLEKEAFESSMQHQRAVWFVAEVQRRERADLVR<br>DIELRTNELENSIERRREELERHYQEKELSFQKEKEKGMQYISAQRELLR<br>KETEEMKAERQRLERERKEIATNQEHDKWSEMKKDIEELQIQREKL<br>KEQRESLHKEREELQAQLEELKLLKDELKMTSESLKVSSEQLSQVNLND<br>CEVISPGHGISAALRQSIFAVPENANIEFNSGISPVRTPASASTPSPLA<br>WLQKCASRIFKPSPEK                                                                                                                                                                                                                                                                                              |
| Cde1 | Calocedrus_dec<br>urrens | onekp:FRPM_<br>scaffold_20<br>04713 | MMTPNRRGRWPGWSPTSRSPPAVDDKAVAVLEKSAGKAAVEAPPR<br>NSLDGNGRFTPAAAAAAEPEVWRRFKESGLDQDSLEKKDRTALLLHI<br>SKLDAELYDYQYNMGLLIERKEWTSNYEQIKLALVEAESLKREQSAHL<br>VAITEAEKREESLKKSLGVEKQCVSDLEKALHEMRSEVAELKFISESKLA<br>QARDLVTSTEEKTLEAESRLHAAEALQAEASRKHATERKLQIESIENA<br>LRRDRQSFKSERDAHEVELSLQRRNLLDWEKKLQDGDRLLEGQRLLN<br>QREEYTNQRDEALKQIEKELEDTKKQIENDHSTLKEQEADISVRLTALST<br>REENAVKREFLIDKKEQELLVLQEKLASKENEIQLLDEHRAMLEARKI<br>DFEALEQKKISVEEELKRRSALELFEADIKSKEEKISKREQQIEKTDKL<br>KEKEKEVDSRSTLKERKMLKNEEKEIMIEKKKLDGEREEINNEKQELQ<br>NLKVSLEEEKQIIESEKDKLVTEKERNELQNLQTELKEEENYRARKQEI<br>EKEAEELRLEKEKFEKEWEFLDEKREQANKELALVEEKKRISKWLRDEE<br>ERLKQEKSAKERIQNETEALHLEKEAFAASMQHERAEWLESIRREQA<br>DLIRDSELHRSDLENNIEKRQEEIEKFLREKETGFQKEKERETQHITAQRE<br>LVSKEMEEMRLERKKLEKEREINKSRQHAEMQWIEIKKDIVELQLQR<br>DKLKEQREYLCKEREVSRLSEQLNWKRELNISEDTLDIANKGGNYR<br>AEDVYGFSEAVPQKFFGTPASASAKGDPEPSSGRTVPSASGTPSRLS<br>WLQRCATKFFNQSPSPEKIIDGTGRKGETDRSPTVLPETTGAESERITGE<br>IVVGLIQPTFSADDQNHDAEETEVAQAKGTSKSSPAVKFDHVSVP<br>RSKGNKSKSNDKSKVKVFKRTRSIKAVVEDARGIIDAPSDQEKNESES<br>EEHAVADDRQDKEARAGGDQTNQAQEVDDSNRESLATDKKSSKSGR<br>KRRRGHSSRVTSEQDVDDSEIQSESAAGGRRKRRQKGTNGGTSVLAT |

|      |                          |                                     |                                                                                                                                                                                                                                                                                                                                                                                                                                                                                                                                                                                                                                                                                                                                                                                                                                                                                                                                                                                                                                                                                                                                                                                                                                                                                                                                                                               |
|------|--------------------------|-------------------------------------|-------------------------------------------------------------------------------------------------------------------------------------------------------------------------------------------------------------------------------------------------------------------------------------------------------------------------------------------------------------------------------------------------------------------------------------------------------------------------------------------------------------------------------------------------------------------------------------------------------------------------------------------------------------------------------------------------------------------------------------------------------------------------------------------------------------------------------------------------------------------------------------------------------------------------------------------------------------------------------------------------------------------------------------------------------------------------------------------------------------------------------------------------------------------------------------------------------------------------------------------------------------------------------------------------------------------------------------------------------------------------------|
|      |                          |                                     | PGGRRYNLRHSTIASHVGNQTPSTVVKDRIVAQPEEEEPKNMEGTSSV<br>KDTKDSREDSLYNTTMVPSAQDSDNDVPQGETHDFPRHPDGGLEDD<br>TEEVLSHELTKSETGDHYDETENGEENEDAPVDEIEDEQIDELDEDGD<br>DEEDNNASLKKKIWKFLTS                                                                                                                                                                                                                                                                                                                                                                                                                                                                                                                                                                                                                                                                                                                                                                                                                                                                                                                                                                                                                                                                                                                                                                                                 |
| Cde2 | Calocedrus_dec<br>urrens | onekp:FRPM<br>_scaffold_20<br>10579 | SPVNEEMWRRLLKKVGLDEETLQKKDKAALIAHITKLETEVYDYQYNM<br>GLILLEHKELISKYEQLKLTAGEAEGNFKRDRAAHSAAAEAEKREESLR<br>KALGIEKQCVDLEKALHEMRAESAEIKFVSETKLAKARELVASTEESIT<br>AESKLHAGEALQAEAKHKYADAERLLQDVEAREDELRRQRQSFKSECE<br>AHEKELFFERQNLREWEKNLQEGQGRLLDGGQSLLNQREEYVIERNEAT<br>KQIEKELQDLKKNIEKEQSSLKEKEADLRGKLADLTREEALVKQEVIIINK<br>KEQDLLLQAKLATREREEIQRLTDEYQAALEKRKSVFEEEMKLQHKAV<br>DGELANKRNAADVREFEIQCREEKISKREQQVEKKVEKLKEDKELDTR<br>LRHVKEREKSCKIKEKEIETQLKQLDIERDEMNIKQVLEESKATLEERQ<br>QIHKEQERLELTEKERDDLRIQIKLKEEIDNFRQQEQELLKKDEVLNVEK<br>EKFEREWEILDEKTEQLRKELEKIDNEKKGVSJKLKAEEERLKQERRML<br>REQIKNEEEALRLEKESFANSKKQEEAELLANFEKERADLYRDIELQKSE<br>MEKIIEQRQEELERNYKVRERVFRKEKQKEMQYINAQKELSEKESQEM<br>KLQRQLDREKQEVTTREHIDREWSEMKKDIEEMEIRREKLKELRESL<br>HREEEFEAQLDQLKILKDELKMTEDSLKISEQPPS                                                                                                                                                                                                                                                                                                                                                                                                                                                                                                                                                                        |
| Cdu1 | Cupressus_dupr<br>eziana | onekp:QNGJ<br>_scaffold_20<br>10443 | MMTPNRRGRWPGWSRSTSRSSPAVDDKAVAVAEKSAGKAAVEAPPR<br>NSLDGNGRFTPAPAAAAEPEVWRRFKESGLDQDSLEKKDRAALLHI<br>NKLDAELYDYQYNMGLLLIERKEWTSKYEQVKLTIEAEESLKREQSAHL<br>VAITEAEKREESLKKSLGVEQQCVSDLEKALHEMRSEVAELKFMSESKL<br>AQAREMVAGTEEKALEAESRLHAAEALQAEASRKHAEATERKLQEMESI<br>ENALRRERQSFKSERDAHEVELSLQRRSLLDWEKKLQDSQDRLLLEGQR<br>LLNQREEHTNQDEALKQIEKELEDAKKQIENDHSTLKEQEADIRVRLT<br>ALATREENAVKREILIDKKQELLVLQEKLASKENEEIQKLLDEHRALLEA<br>RKIEFEAELEQKISVEEELEKRRSALELFEADIKSKEEKISKREQQIEKTE<br>KLKEKEKEVDSRSKNLKERKTLKNEEKEIMIEKKLDGEREEINTEKQEL<br>QNLKVSLEEEKQICSEQDKLKLTEKERNELQNLQTELKEEENYRARKQ<br>EIEKEAEELRLEKEKFEKEWFLDEKREQANKELALVEEEKRISKWLRD<br>EEERLKQEKSAKERVQNETEALHLEKEAFAASMQHERAEWLESIRRE<br>QADLVRDSELHRSDLENNIEKRQEEIEKFLREKEIGFQKEKERETQHITA<br>QRELVSKEEMERLERKKLEKEREISKSQRHAESQWIEIKKDIVELQLO<br>RDKLKEQREYLCKERGEVSRLEQLANWKREVNISEDSDLIANKGGSF<br>RSEDVYGFQSQAEPKFFGTPASASAKGDPEPSSGRTVPGASGTPSRLS<br>WLQRCATKFFNQSPSPEKIIDGTGRKGETDRSPTVLPPTIAESERMTG<br>EIVVGLIEQPTLSADDQNCDAQAQTEVVAQAKGTLKSSPAVKFDHSLP<br>SRYKNGSKSNDKSKVKVFKRTRSIKAVVEDARGIIDDALSDQEKNESE<br>SREEHTVADNRQDKEARAGGDQNTNSAQEVDDSNRESLATDKKSSKSG<br>RKRRRGHSSRVTSEQDVEDSEIQSEGAAGGRRRKRQKGTNNGGTSVL<br>ATPGGRRYNLRHSTIASHVGNQTPSRDAKDRVVAQPEEEEPMNIEGT<br>SSVKDTKDSREDSLDNTAMVPSAQDSDNNIPQGETHDFPRHPDGGLE<br>HDTEEVLSHELTKSETGDHYDETENGEVNEADAPVDEIEDEQIDELDED<br>GDDEEDNDSSLKKKIWKFLTS |
| Cdu2 | Cupressus_dupr<br>eziana | onekp:QNGJ<br>_scaffold_20<br>75699 | SPVNEEMWRRLLKKVGLDEETLQKKDKAALIAHITNLETEVYDYQYN<br>MGLILLERKELISKYEQLKLTAGEAEGNCKRDRASHSAAMAEAEKREES<br>LRKALGIEKQCVADEKALHEMLAESAEIKFVSETKLAKARELVASTEES<br>SIAAESKLYAGEALQAEAKHKFADAERFLQDVEAREDELRRQRQSFKSE<br>CEAREKELFFERENLREWEKNLQEGQERLLDGGQRLLNQREEYVIERNET<br>TKQIEKELQDLKRNIEKEQSSLKEKEADLRGLTDLTVREEALVKQEVIIIN                                                                                                                                                                                                                                                                                                                                                                                                                                                                                                                                                                                                                                                                                                                                                                                                                                                                                                                                                                                                                                                   |



|      |                      |                                       |                                                                                                                                                                                                                                                                                                                                                                                                                                                                                                                                                                                                                                                                                                                                                                                                                                                                                                                                                                                                                                                                                                                                                                                                                                                                                                                    |
|------|----------------------|---------------------------------------|--------------------------------------------------------------------------------------------------------------------------------------------------------------------------------------------------------------------------------------------------------------------------------------------------------------------------------------------------------------------------------------------------------------------------------------------------------------------------------------------------------------------------------------------------------------------------------------------------------------------------------------------------------------------------------------------------------------------------------------------------------------------------------------------------------------------------------------------------------------------------------------------------------------------------------------------------------------------------------------------------------------------------------------------------------------------------------------------------------------------------------------------------------------------------------------------------------------------------------------------------------------------------------------------------------------------|
|      |                      |                                       | <p>KKEQELLVQEKLATREREEIQRLTDEHQIALEERKAVFEEIQQQCRAV<br/> DDELANKRNAADVREFEIQCREEKLSKREQQVEKKVEKLKEKDKELDTR<br/> LRHVKEREKSCKIKEKEIETQLKQLDLERDEMNSKQVLEESKATLEER<br/> QQIRKEQERLELTEKERDDLRIIQIKLKEEIDNFRQQEQELLKDDVNLVE<br/> KEKFEREWEILDEKTEQLRKELEKIDNEKRVSKWLRDEEERLKQERRM<br/> LREQIKNEEEALRLEKESFANNKKQEEAELLANFEKERADLYRDIELQKS<br/> ELEKSIEQRQEELERNYQVRERVFRKEKQKQMZYINAQKELSEKESQE<br/> MKLERQRLDREKQEIIVTTREHIDREWSEMKKDIEEMEIRREKLKELRES<br/> LHREREEFEAQLDQLKKLDELKMTEDSLKISEQPPSQANVNDCEAISP<br/> GHFDGGISQAGQSIGMAFNADGFRPELHLTRSTASASDTLSPLAWLQ<br/> KCTSRIFKKS</p>                                                                                                                                                                                                                                                                                                                                                                                                                                                                                                                                                                                                                                                                                                                                |
| Cgr1 | Capsella grandiflora | Phytozome 12<br>Cagra.1125s<br>0018.1 | <p>MTTPLKVVQRWSTPTKATNPDSNGSSHGKGLDMVTPVSGRVSEIQF<br/> DDPRILPEKISELEKELFEYQHNMGLLLIEQKEWSSKYEELQHDVFEANE<br/> CLKRERNAHLIAIADVEKREEGLRKALGIEKQCALDLEKALRELRSENAEI<br/> KFTADSKLTEANALVRSVEEKSLEVEAKLRAVDARLAEVSRKSSEVERKA<br/> KEVEARESSLQRERFSYIAEREADEATLSKQREDLREWERKLQEGEERV<br/> AKSQMIVKQREDRENDNDKIIKQRGKELEEAQKKIDAANLAVKKLEDD<br/> VSLRIKNLALMEQETDVLKKSIEKTAQELQALQEKLEAREKMAVQQQLID<br/> EHKAKLDATQREFELEMEEKRKLVDDSLKSKVVEVEKREAEWKHMEEK<br/> VVKREQALERKLEKHKEKEKDFDARLKGINGREKVLKSEEKALETEKRKL<br/> LEDKEIILNLKTEVEKIKAEENEVQLSEIQKEKEGLRVTEERSEYLRQLTEL<br/> KEQIEKCRSQEQLLKEAEDLKSQRESFEKEWEELDERKAKIENELKNIT<br/> DQKEKLERQNHLEERLKEKQAANENMQRELEALEVAKASFAETME<br/> HERSMLSKAESERSQLLHEIEMRNRKLESDMQAKLEERERELQAKEKL<br/> FEEEREKDLNINYLRIASKEMADMKNERHRIVKEKLEVDASKNHLEE<br/> QQTEIRKDVEDLVALTKKLKEQREQFISERSRFLSSMESNRNCNPGCELL<br/> HELVLPEIDNVEMPNMSKLANILDNEVPRQEIREDISPTAAGLGLPVAG<br/> GTVSWLRKCTSKILKSPIKMAEPSVTWNLADQEQPADQANVNSGPS<br/> STPQAVTNSFDVQKAESGTKEVEVTNVNSDGDQSNINSKAQEVAS<br/> DLSLNQADGQSRMRGKAKARTRRRSVKDVEDAKAIYGESIDLCEP<br/> NDSKENIEANDVSMGEPGRSDRATSKNGRKRGRVGLRRTCTTEQDGN<br/> ESDGKSDSVTGGAAQQRRRQKVASEQQGEVVGQRYNLRPRRVGTGE<br/> TTLKSKHNETSGAQQDEGVYCAQTTVEASVGVAVSDNGVSTNVVQH<br/> EDTADSQDTDAGSPKRTGESEAMSEDGHKTPQRADSDGEDDESDAE<br/> HPGKVSIMGKLLWTFLLT</p> |
| Cgr2 | Capsella grandiflora | Phytozome 12<br>Cagra.0917s<br>0008.1 | <p>MATRSERFPITPSTAATNRLAITPNSRVLKSPLTEEVMMWKRLKEAGFD<br/> EQSIKKRDKAALIAYIAKLESEVYDYQHNMGLLLEKNELLSKYEEVKASV<br/> DEADLAHRREQSAYVSALAEANKREESLKKDVGVAKECISSLEKTLHEM<br/> RAECAETKVSAGSKMSEAHIMIEDALKKYADAEAKMRAAEALQAEAN<br/> RYHRIADRKLKEVESREDDLTRRLASFSESEMKENEMIIERRNLNERRT<br/> SLQQEHEKLLDAQVSLNQREEHIFARSQELAEKKGLEAAKTTFFEERK<br/> AFENKKSNIETLALIAKREEAVSGKESLLKKEQELLVAEEKIASKESELIQ<br/> NVLANQEVILRKRKSDVEAELECKSKLVEDEMESKRRASELREVDIKQR<br/> EDLVGEKEHDLEVQLRELAKEKDITEKSYNLDEKEKLLIATEEDNNHKA<br/> TLENEKERLRKLDLQQLMSLEDKRRKRVDSATEKLEALKSETSDLST<br/> LEMRLKEELDDLRAQKLEMLAEADRLKVEKAKFEAEWEHIDVKREELR<br/> KEAEYITRQREAFSMYKDERDNIKEERDALRNQHKNDVDSLQEREE<br/> FMNKMVEEHSEWLNKIQRERADFLGIDMQKQELECYIENKREELNS<br/> SREREKAFEQEKLEERIQLSKETVEKEVEHLQVELRRLDAERLEIKLDR<br/> ERREREWAEKDSIEELKVQREKLEKQRHMLRAEREEIRHEIEELKLEN<br/> LKVALDDMSMAKMQLSNLSRWEKVSALKQKVVSRDDELQNGVS</p>                                                                                                                                                                                                                                                                                                                                                                                                                  |

|        |                         |                                          |                                                                                                                                                                                                                                                                                                                                                                                                                                                                                                                                                                                                                                                                                                                                                                                                                                                                                                                                                                                                                                                                                                                                                                                                                                               |
|--------|-------------------------|------------------------------------------|-----------------------------------------------------------------------------------------------------------------------------------------------------------------------------------------------------------------------------------------------------------------------------------------------------------------------------------------------------------------------------------------------------------------------------------------------------------------------------------------------------------------------------------------------------------------------------------------------------------------------------------------------------------------------------------------------------------------------------------------------------------------------------------------------------------------------------------------------------------------------------------------------------------------------------------------------------------------------------------------------------------------------------------------------------------------------------------------------------------------------------------------------------------------------------------------------------------------------------------------------|
|        |                         |                                          | TVNSNEDGYNSSMERQNGSTPSSATPFSWIKRCTNLIFKTSPEKSPLMY<br>QHEEEGGGLPSEKSKLDSSKREEKAYTEGLSIAVERLEAGRKRNRGNS<br>GNDTSEPSNNKRRKHDVTQKTSDEADTQSVISSPQNVPEKDHELPSQ<br>TQTPSGMVVISETVKVTTVTCEVTVNKVTTLDYSENPTAAGMGEEIPD<br>SDCNESGINASDDGGIVT                                                                                                                                                                                                                                                                                                                                                                                                                                                                                                                                                                                                                                                                                                                                                                                                                                                                                                                                                                                                            |
| Cgr3I  | Capsella<br>grandiflora | Phytozome<br>12<br>Cagra.0613s<br>0001.1 | MFTPQRNRWPETDRKGKAIAFSDEIMTPSPRGLLREDDDWRFKEV<br>GLLDEASLERKDRDALIEKILKLEKELFDYQHNMGLLIEKKKWTSTNEEL<br>QQAFDEATEILKRERTSNLIALNEADKREENLRKSLNAEKQFVAELEKDL<br>KYWQQEHSEVKSTSEAKLAEADALVMGMKEKTLEVDREIRAIAEEKLSV<br>INRKSSELERKLEKVEVETREKVHQREHLSLVTREAEHEAVFYKQREDLQD<br>WEKKLILEENRLSEAKRSLNHREERIMENERTIKKKEKLEEMQKQTDIA<br>KSELTEREESINTLLNDISKKEKDFEAVKAKVDIKEKELHEFEELIVREQ<br>MEIGKLLDDQKTVLDSRRQEFEMELEQMRRSLDEELEGKKADIEQLQV<br>EINQKEEKLAKREAALEKMEERLKVKDKDLEARLKTVKENEKSLKAEGK<br>KLHLENQRILLEDKECLRKLKDEIEEIGAETTKQESRIEENESLRITKEERLE<br>FLRLQSELKQQLDRVEQEKKLLKEREELKQDKERFEKEWEVLDKADIA<br>AREQKEVFEEKELRRLQISEKDRLNREEMTSRDDLRRELDGVMKQKE<br>SFQADMEIKKALHENAKNKTNQLVEDLEKQKRNLDMELQRQEEEGE<br>RDFNERARTYEKRSQEELNINITYKLAQREIEEVQYKLALEKERDEISI<br>QKLLKEQEVEMHKDITELDLRSSLKEQRAEFISTRERFLVFLEKLKSCS<br>SCGEIAENFVMSDLQLPDVKDGDGKLFGRKRLKADEALNISPSAEISRKTS<br>FIGKIASKLLSISPIGKTDKVTDLGITVKLPKSSQRDDNLDTVSGDDHEPS<br>ATEQSFTDSRIQEGPEVSLQSEIQSEKPRRGRGRGKSVRGRSQATKAAS<br>KDLKPSDVETPRKRQREHASRITESEHTAGDSDEGVDSVATGGRRKR<br>QIAPVVSQPPGQSRYLRRHRNVGTEEDKAQASTGATEKQESVNGDI<br>RTVASPKDTLTPQGEIRESGKAEVLVEAVTYEEIVRVEAETGFKDNT<br>GKRAVEDAQLETGGISEIREHGEDDDENFSMIEEENEGEREATERQGD<br>ASIGKKIWWFFTT                         |
| Cgr3II | Capsella<br>grandiflora | Phytozome<br>12<br>Cagra.0568s<br>0239.1 | MFTPQRKPWMSAMTTPRSETHKIGGVNTPRTADRKGKAVAFSDDL<br>VISTLPPPIGTLTGEGVSRVLADDTDMGDWRRRFREVGLLDEASMEKK<br>DREALLEKVSTLEKELYGYQHNMGLLMMENKEWASKHEQLNQAFQEA<br>QEILKREQSSHLYALTVEQREENLRKALGLEKQCVEELEKALRDIQEEN<br>SKVRLTSEAKLAEANALVASVNGRSDVENKIYSAESKLAATRKSSELE<br>MRLKEVETRESVMQQRLSFAKERESYEGIFHKQREYLHEWEKKLQEK<br>EESMPEQKRSLNQKKEKVNEKEKLTLEKELEESNRKVDLAMSKCKET<br>EEDITKRLEELTTKENEAHTLQSRVLEKEKELQAFEEERLIAREETEIQKLID<br>DQKEALAAKMLEFELECEERRKSLDKELLRKIEELERQVLDHNEEKLQ<br>KRNOAINKKFDRVNEKEMELEAKSKTIKEKEKILQAEKKSLEKQQLLS<br>DRESLEDLQQELEKIRSEMMKKEELIQEFSLEIKKEERDEFMRLQSEL<br>KSQIEKSRLHEEFLSKEVDNLKQEKERFEKEWEILDEKQAEYNKERLQM<br>SEEKAKFERFQLLEGERLEKEESALRVQIMQELDDIRLQRESFEASMEHE<br>RSALHEKAKLEQSKVIEDLEMTRRNLEIELQRRKEQDEKDLQTRVALFE<br>DKKKIELSDINHQQALNREMEEMLSKRSALQKESEEIAKHKEKLEKQ<br>LEMHNDIGELSTLSINLKKRREVFARERARFLAFVQKLDKCGSCGQLAN<br>EFVLSDLQLPSNEEAAILPPTGVLSDIPGSSDES DSCNIKSLDGDASGSG<br>GSRRPNTSILQKCTSIFFSPSKKTGHGINTDKSDQRPSSSVAVNMEKIGE<br>KPLPVDLRPCPSNSSIPEEDEEYTDSDRVQETSEGSQLELQSARRGRGRP<br>RKVKPALNPKSLVKHAGPEESSKDELSGRVSVTSKKTGGGGRKRQHIE<br>DTATGGHRKRQQTAVLPQTPGQRRYNLRRNKTDQVPADVEDNAA<br>GGEDDADISPSVPSKENVEETSESVMESLRARRLETSEVGVERVVMVE<br>TIANLVTADNNGGVSVANAEPANITTSVSDVDDQKQNTVNEDDMNE |



|      |               |                                                         |                                                                                                                                                                                                                                                                                                                                                                                                                                                                                                                                                                                                                                                                                                                                                                                                                                                                                                                                                                                                                                                                                                                                                                                                                    |
|------|---------------|---------------------------------------------------------|--------------------------------------------------------------------------------------------------------------------------------------------------------------------------------------------------------------------------------------------------------------------------------------------------------------------------------------------------------------------------------------------------------------------------------------------------------------------------------------------------------------------------------------------------------------------------------------------------------------------------------------------------------------------------------------------------------------------------------------------------------------------------------------------------------------------------------------------------------------------------------------------------------------------------------------------------------------------------------------------------------------------------------------------------------------------------------------------------------------------------------------------------------------------------------------------------------------------|
|      |               |                                                         | <p>EITAARSACEAAQQLQEKEENLRKREEAVERKSENMDKKLEKVKEKE<br/> RDLGERERALRAQKKAVELDRQSLEEAGRASMKDKADIEDLLEEGK<br/> RAFALEVDGLQTQKHALEEDKAALERENAEKLAGLQGELEKLKEEGEE<br/> LAKIRQNLEAEREELKAERTRFEDKVVVLDQREKELAEMEERLAGEVK<br/> SERLQLQEERVGMQAVRDAEARATEAERAAAAARVEQVEAAAKME<br/> MEKERVAERELMDRQRAAELLKLEESGKEYRKDLEVEFATKLEEARLQ<br/> MLQETVAEADKRMKAMEEKAVEIDALRTQLANVEVMLKEKVEALE<br/> RAEAALIEGRHEVREMRAEMAKKVAEAEKEKVAANAEGGLAVVERKE<br/> LEKEREALIEQRRKVMAEAHAEAAVIVATKVVVQKNLESARMALLKE<br/> VEDLKRQAKEDLDKEREVLACARASAQEMKVRNAVETEHAKVKAAL<br/> EKLRFERSKLVALKEELQAHQAQQLAGAVATGEIDGMHLPNVDAEAV<br/> YHGGEPDAALLTPLAASQPMDAVGEKERAMDVAGKRAEGSVVERFN<br/> QMRSPPLFSPGGTINWLQQCTRGFFTPKNNGDEQSPAPEAQADAV<br/> DDNHNEEDQRMMVSCPVQGRSGSSGLRRKTTIEVTVAEALFLGSG<br/> GTASTHDGLPQEQGHAEETASGCKERQDVRPIPRTRTISETIEEGRFF<br/> LGLDAAAADDEDDDDMRVSMEMVMGPSVAGLETVEEVDEEGEGA<br/> EQLGIELSAADLVAVRESGMPMEGERRGEDSDAITSAAKSALRVTKRT<br/> RSMRDVVDEGRKFGISTDATDADDTTQIPLSGRTRRSSKPTAAASMD<br/> NALELEASGPVSSAAAEPIGNRLRRSNRPADHIKGGIDTSETPSMQ<br/> PVGVGVSVNRRSRRSNRPTHTKAGPDTSEAPSILQPGEEAQQGSRR<br/> LRQRHSMADYSKGNTESESEGMRRPRKSRFSTIGPSETPAMSADTA<br/> TAHGSRYNLRKSKRFVWMDGCVIAGRHRSSGHTDVESESEATSAHAE<br/> ATSPPKALD</p> |
| Cpa1 | Carica papaya | Phytozome<br>12<br>evm.model.s<br>upercontig_1<br>79.33 | <p>MGLLIEKKEWSPKYEELKQDLTAAKDALKREQAHLIAISEVEKREEGL<br/> RKALGVEKQCLLDLEKALRDMLENAEIKFTADSKLAEANALVTSVEEK<br/> SLEVEAKLHAADARLAEVSRKSSEIERKLQEVESLENALRRERLSFIAERE<br/> AHETILSKQREDLREWERKLQEGEERLAKSQRIINQREERANENDRIIKL<br/> KEKDLEETQKKIDAAKLDLKHKEDDISCRLKDLTSKEQECDAMRKNIEM<br/> KEKELLAVEEKLNTREKVEIQKLLDEHNAVLDVKKREFELEVDQKRKSVD<br/> EDMKTKVSEVEKKEAEIKHMEEKAAREQALDKKLEKLOEKEKDLDLRL<br/> KGLKERDKVLKTDEKNLENQKKQLLAGMEELQGLKNEIEKMRYDNEQ<br/> QLLRIHEEKDRLRVTEERSEYVRLQTELKEQIEKSRLQEELLKEAEDLK<br/> QQKENFEKEWEELDERRMQIDKELKSIGSLRNGKRSRARSRRVTVSE<br/> QDNHGSDDGSDSVTTGQRRRRRQKVIPDVQTRGETRYNLRPPKVG<br/> AVKKDSSRSKKEIEKVDDVVAEDRIVYSKAAPSSSVGVAENGGAYL<br/> VKCGTTVDATPEKKVQNVAVSEEVNGTREGDAEYGDGNEYSQGDIAV<br/> AVEVEDEGESEDDDDNDQEDSEHPGEVSIKKLWTFFFT</p>                                                                                                                                                                                                                                                                                                                                                                                                                                       |
| Cpa2 | Carica papaya | Phytozome<br>12<br>evm.model.s<br>upercontig_1<br>29.57 | <p>MASPYSGRLAITPTSVKGLSITPGSRVLLTDDDIWKRLKEAGFDEESIKK<br/> RDKAALIAYIAKLEAEDFEIGAYFLIALCDAKEKELMLERQSLSERQKILQ<br/> QEHERLLDSQTSLNQREDYIFNRSQELTQLEKDLETARSGVEEERRVLK<br/> EEKSNLELTRVSLSKREEVVIEREVLLHKKEQELLVSQEKLASKESDEM<br/> KIIANQETILRKRKSELEAELEIKRKLVEDEIETKRRRAWELREVDLSQGEDL<br/> LNEKEHELELQSMALADKEKDVAERSNLLDEREKALTAASEKEIEQKRAIL<br/> QKEKEEINKMKVDVTKTLDSDKDRKQVDHAKQKLETMKSETNELSVL<br/> EVKLKEELDSVRAQKLELMAEADKLKVEKAKFEAEWELIDEKQEELRKI<br/> AEHVAQERDLSKFLRDERESLREKDALRDQHNHALETLNHEHEEFM<br/> RKMVHERSEWFSKIQQERADFLGIEMQKRDLENCIEKRRDELESNFK<br/> EREKTFELEKSELQHISTLKERAKELEQVSLMKRLDAERMEIKLDRE<br/> RRDREWAELNHSIEELKVQRQKLEKQRELLHADREVIHSEVEELMKME<br/> DLKAALDNMAMVMMQSNVENSQKLVSGDRYLKQHNIMQDADLES<br/> HKEKDVANGCGSDSSMQKPVGYSPMSSARFSWIKRCTELIFKHSPD</p>                                                                                                                                                                                                                                                                                                                                                                                                                         |

|      |                  |                                                        |                                                                                                                                                                                                                                                                                                                                                                                                                                                                                                                                                                                                                                                                                                                                                                                                                                                                                                                                                                                                                                                                                                                                                                                                                                         |
|------|------------------|--------------------------------------------------------|-----------------------------------------------------------------------------------------------------------------------------------------------------------------------------------------------------------------------------------------------------------------------------------------------------------------------------------------------------------------------------------------------------------------------------------------------------------------------------------------------------------------------------------------------------------------------------------------------------------------------------------------------------------------------------------------------------------------------------------------------------------------------------------------------------------------------------------------------------------------------------------------------------------------------------------------------------------------------------------------------------------------------------------------------------------------------------------------------------------------------------------------------------------------------------------------------------------------------------------------|
|      |                  |                                                        | KSLMKDDDFGESKRTVDVVPDGEAEIKAPIKGSTKLIQQALVAGRKRRV<br>NNFSVGNVNSQLVHMQSKYKKRKQLNEPLVKLSEESTERVILTIPNE<br>PEDKHELLSTSQTQGDAGETSLFTDRIVKISSVVENAGSGSLVNKEKV<br>QLQSTVSQLEKDVHLGDIKSHETSACAEPQEEVCLRNVGQPTEDIQLQ<br>E                                                                                                                                                                                                                                                                                                                                                                                                                                                                                                                                                                                                                                                                                                                                                                                                                                                                                                                                                                                                                       |
| Cpa3 | Carica papaya    | Phytozome<br>12<br>evm.model.s<br>upercontig_1<br>.235 | MGLLLIEKKEWASRYEELTQALDEVEEILKREQSANLIALSEVEKREEML<br>RKALSVEKQCVEELEKALRDMQEEHAQMKLTSENKLSDAKDLVVGIDE<br>KLEAEKMRVAAEAQLAEVNRKSSEMEDIKLEVEARENVLQREHLSLIA<br>EREAHAATFYQREDLHEWERKQKQEEQLSQLRRNIKMREEKENEN<br>DKIHKQKERDVEELQRKIDFASSTLKEKEDDINYRLKDLVDVKEKAANS<br>MSALEMKEKELCVLEELTARERGEIQKLLDDQRALLDTKMQKFELEQE<br>EEKESLDEELRKRIEVVEQQAENVNHKEEKLKREKQALDKKSERLKEKEK<br>DLEARLTKIKEKERFLKGEEKMFELKKQQLDTARESLODLKEEIDKIGAES<br>TRQELQIREEYEQLKITEEERAHLRLQSELKQKQIEKWQHQEELLLKERE<br>DLKQDRESFEKEWEALDEKRAKVLKEQKSIAEGKEKFEKFLQSEEERLKK<br>EESMNDYIKRELDNIRLQKESFEAEMKHERLVLSEEAQNEQSKMLQD<br>FETQRRNLETEMWRRQEENEKYLQEKTFEFEKCKKENYINIDLKIEAR<br>REIEEIKIDSRALQKEKQDILIDKEKLKEQQLMRKDIKELGNLSSNLKKK<br>QEQFIRERSRFLVFVEKLNNSDCGEITRNFIIISHIRDALPPDVRNVDR<br>SPDVVDLGDANSQQHVSWLQKCTSKIFSIPTRKGERISVSHLAEHM<br>PLSVEASIERKVDEPGMTISNEDRDLGTGSFDVQPPTSENTIRDLDAC<br>TQSFDDNSCMDSCRQEPPEDSQQSELKSGRGRGKPKLALNRTRTM<br>KAVVEEAELFKDSSRGLEQNTTVQPNIPQENEESSMSVSGRVEKAAS<br>TVARKRQRAQGSKMTSEQDAVDSGDHSDSVTTVRRRKRRTVASA<br>LQTPGKRYNLRRHKTAGKVAQAQTSADLTKTVEKEVGDAAEITNPEAV<br>SVDVGTESGKSTPLVPVGLNVVDFSQDRIVRLKTAATENTKSAIARDN<br>ADMKTVENTEFSEETNDATDYVQEDKSGSRGQEEDEFDFEHPGE<br>VSIKRIWTFFT                                        |
| Cru1 | Capsella rubella | Phytozome<br>12<br>Carubv10019<br>693m                 | MTTPLKVVQRWSTPTKATNPDSNGSSHGKGLDMVTPVSGRVSEIQF<br>DDPRILPEKISELEKELFEYQHNMGLLLIEQKEWSSKYEELQHDFFEEANE<br>CLKRERNAHLIAIADVEKREEGLRKALGIEKQCALDLEKALRELRSENAEI<br>KFTADSKLLEANALVRSVEEKSLEVEAKLRAVDARLAEVSRKSSEVERKA<br>KEVEARESSLQRERFSYIAEREADEATLSKQREDLREWERKLEGEERV<br>SKSQMIVKQREDRANDNDKIIKQRGKELEEAQKIDAANLAVKKLEDD<br>VSLRIKNLALMEQETDVLKKSIEKQELQALQEKLEAREKMAVQQLID<br>EHKAKLDATQREFELEMEEKRKLVDDSLKSKVVEVEKREAEWKHMEEK<br>VVKREQALERKLEKHKEKEKDFDARLKGINGREKVLKSEEKALETEKRKL<br>LEDKEIILNLKTEVEKIKAEENEVQLSEIQKEKERLRVTEEERSEYLRQLTEL<br>KEQIEKCRSQEQLLKEAEDLKSQRESFEKEWEELDERKAKIENELKNIT<br>DQKEKLERQNHLEERLKEKQANENMQRELEALEVAKASFAETME<br>HERSMLSKAESERSQLLHEIEMRNGKLESMDQAKLEERERELQAKEK<br>LFEEEREKDLNINYLRIASKEMADMKNRHRIVKEKLEVDASKNHLE<br>EQQTEIRKDVEDLVALTKKLEQREQFISERSRFLSSMESNRNCNCPGE<br>LLHELVLPEIDNVEMPNMSKLANILDNEVPRQEIREDISPTAAGLGLPVA<br>GGTVSWLRKCTSKILKLSPIKMAEPSVTWNLADQEQPADQANVNSGP<br>SSTPQAVTNSFDVQKAESGTGKEVEVTNVNSDGDQSNINSKAQEVA<br>SDSLSNQNADGQSRMRGKAKARTRRTRSVKDVVEDAKAIYGESIDLCE<br>PNDSTENIEANDGSMGEPGRSDRATSKNGRKRGRVGSRLRTCTTEQDG<br>NESDGKSDSVTGGAAQQRKRQKVASEQQGEVVGQRYNLRRPRRVGTG<br>ETTLKSKHNETSQAQQDEGVYCAQTTVEASVGVAVSDNGVSTNVVQ<br>HEDTADSQDTDAGSPKRTGESEAMSEDVHKTPQRADSDGEDDESDA |

|        |                  |                                        |                                                                                                                                                                                                                                                                                                                                                                                                                                                                                                                                                                                                                                                                                                                                                                                                                                                                                                                                                                                                                                                                                                                                                                                                                    |
|--------|------------------|----------------------------------------|--------------------------------------------------------------------------------------------------------------------------------------------------------------------------------------------------------------------------------------------------------------------------------------------------------------------------------------------------------------------------------------------------------------------------------------------------------------------------------------------------------------------------------------------------------------------------------------------------------------------------------------------------------------------------------------------------------------------------------------------------------------------------------------------------------------------------------------------------------------------------------------------------------------------------------------------------------------------------------------------------------------------------------------------------------------------------------------------------------------------------------------------------------------------------------------------------------------------|
|        |                  |                                        | EHPGKVSMGKKLWTFLLT                                                                                                                                                                                                                                                                                                                                                                                                                                                                                                                                                                                                                                                                                                                                                                                                                                                                                                                                                                                                                                                                                                                                                                                                 |
| Cru2   | Capsella rubella | Phytozome<br>12<br>Carubv10025<br>809m | MATSRSERFPITPSTAATNRLAITPNSRVLKSPLTEEVMMWKRLEAGFD<br>EQSIKKRDKAALIAYIAKLESEVYDYQHNMGLLLEKNELLSKYEEVKASV<br>DEADLAHRREQSAYVSALAEAKKREESLKKDVGVAKECISSLEKTLHEM<br>RAECAETKVSAGSKMSEAHIMIEDALKKYADAEAKMRAAEALQAEAN<br>RYHRIADRKLKEVESREDDLTRRLASFKESETKENEMIIERRNLNERRTS<br>LQQEHEKLLDAQVSLNQREEHIFARSQELAEELKKGLEAAKTTFFEEERKA<br>FENKKSLEITLALIAKREEAVSGKESLLKKEQELLVAEELKASKESELIQ<br>NVLANQEVILRKRKSDVEAELECKSKLVEDEMESKRRASELREVDIKQR<br>EDLVGEKEHDLEVQLRELAKEKDKITEKSYNLDEKEKLLIATEEDNNHKA<br>TLENEKERLRKLDLDLQQSLMSLEDKRKRVDSDATEKLEALKSETSDLST<br>LEMRLKEELDDLRAQKLEMLAEADRLKVEKAKFEAEWEHIDVKREELR<br>KEAEYITRQREAFSMYKDERDNIKEERDALRNQHKNDVDSLQEREE<br>FMNKMVEEHSEWLNKIQRERADFLGIDMQKRELEYCIENKREELENS<br>SREREKAFEQEKLEERIQLSKETVEKEVEHLQVELRRLDAERLEIKLDR<br>ERREREWAELKDSIEELKVQREKLEKQRHMLRAEREEIRHEIEELKLEN<br>LKVALDDMSMAKMQSLNLSWEKVSALKQKVVSRDDELQNGVS<br>TVNSSEGGYNSSMERQNGSTPSSAIPFSWIKRCTLNIFKTSPEKSPLMY<br>QHEEEGGGLPSEKSKLDSSKREEKAYTEGLSIAVERLEAGRKRGRNSS<br>GNDTSEPSNKKRKHVDVTQKSSDEADTQSVISSPQNPEDKHELPSSQ<br>TQTPSGMVVISETVKVTTVTCEVTVNKVTTLDYSENPTAEGMGEEIPD<br>SDCNESGINASDDGGIVT                                                                                                         |
| Cru3I  | Capsella rubella | Phytozome<br>12<br>Carubv10019<br>698m | MFTPQRNRWPETDRKGKAIAFSDEIMTPSPRGLLREDDDWRFKEV<br>GLLDEASLERKDRDALIEKILKLEKELFDYQHNMGLLIEKKKWTSTNEEL<br>QQAFDEVTEILKRERTSHLIALNEADKREENLRKSLNAEKQFVAELEKDL<br>KYWQQEHSEVKSTSEAKLAEADALVMGMKEKTELVDRERAIAEELKSV<br>INRKSSELERKLKEVETREKVHQREHLSLVTEREAHEAVFYKQREDLQD<br>WEKLLTLEENRLSEAKRSLNHREERIMENERTIKKKEKLEEMQKTDI<br>AKSELTEREESINTLLNDISKKEKDFEAVKAKVDIKEKELHEFEELKLVREQ<br>MEIGKLLDDQKTVLDSRRQEFEMELEQMRRSLDEELEGKKADIEQLQV<br>EINQKEEKLAKREAALKEERLKVVDKDLKLEARLKTVKENEKSFKAEGK<br>KLHLENQRLLDKECLRKLKDEIEEIGAETTKQESRILEENESLRITKEERLE<br>FLRLQSELKQQLDRVEQEELKLLKEREELKQDKERFEKEWEVLDEKKADI<br>AREQKEVFEEKELRRLQJSEKDRLNREEMTSRDDLRRELDGVMQKE<br>SFEADMEIKKALHENAKNKTNQLVEDLEKQRNLDMELQRQEEEGE<br>RDFNERARTYEKRSQEELNINYYTKQAQREIEEVQYKLALEKERDEISI<br>QKLLKEQEVEMHKDITELDLRSSLKEQRAEFISTRERFLVFLEKLKSCS<br>SCGEIAENFVMSDLQLPDVKDGDKLFGRKRLKADEALNISPSAEISRKTS<br>FIGKIASKLLSISPIGKTDKVTDLGITVKLPKSSQRDDNLDTVSGDDHEPS<br>ATEQSFTDSRIQEGPEVSLQSEIQSEKPRRGRGRGKSVRGRSQATKAAS<br>KDLKPSDVETPRKRQREHASRITESEHTAGDSDEGVDSVATGGRRKRR<br>QIAPVVSQPPGQSRYLRRHRNVGTEEDKAQASTGATEKQESVNGDI<br>RTVASPKDTLTLPOGEIRESGKAEVLVEAVTYEEIVRVEAETGFKDNT<br>GKRAVEDAQLETGGISEIREHGEDDDENFSMIEEENEGEREATERQGD<br>ASIGKKIWFVFTT |
| Cru3II | Capsella rubella | Phytozome<br>12<br>Carubv10011<br>605m | MTTPRSETHKIGGVNPNRTADKKGKAVAFSDDLVLSTLPPPIGTLTGE<br>GVSRLADDDTMDGDWRRRFREVGLLDEASMEKKDREALLEKVSTLEKE<br>LYGYQHNMGLLLMENKEWASKHEQLNQAFQEAQEILKREQSSHLIAL<br>TTVEQREENLRKALGLEKQCVEELEKALRDIQEENSKVRLTSEAKLAEAN<br>ALVASVNGRSSDVENKIYSAESKLAEATRKSSELEMRLKEVETRESVMQ<br>QERLSFAKERESYEGIFHKQREYLHEWEKLLQEKEESMPEQKRSNLQKE                                                                                                                                                                                                                                                                                                                                                                                                                                                                                                                                                                                                                                                                                                                                                                                                                                                                                            |

|       |                      |             |                                                                                                                                                                                                                                                                                                                                                                                                                                                                                                                                                                                                                                                                                                                                                                                                                                                                                                                                                                                                                                                                                                                                                                                                                                                                                                                      |
|-------|----------------------|-------------|----------------------------------------------------------------------------------------------------------------------------------------------------------------------------------------------------------------------------------------------------------------------------------------------------------------------------------------------------------------------------------------------------------------------------------------------------------------------------------------------------------------------------------------------------------------------------------------------------------------------------------------------------------------------------------------------------------------------------------------------------------------------------------------------------------------------------------------------------------------------------------------------------------------------------------------------------------------------------------------------------------------------------------------------------------------------------------------------------------------------------------------------------------------------------------------------------------------------------------------------------------------------------------------------------------------------|
|       |                      |             | <p>EKVNEKEKKLTLKEKELEEWNRKVDLAMSKCKETEEDITKRLEELTTKEN<br/> EAHTLQSRVLEKEKELQAFEERLIAREGTEIQKLIDDQKEALAAKMLEFE<br/> LECEERRKSLDKELLRKIEELERQRVLDHNEEKLQQRNQAINKKFDRVN<br/> EKEMELEAKSRTIKEKEKILQAEKKSLEKQQLSDRESLEDLQOQELEKI<br/> RSEMMKKEELIQEEFKSLEIKKEERDEFMRLQSELKSQIEKSRLHEEFLSK<br/> EVDNLKQEKERFEKEWEILDEKQAEYNKERLQMSEEKAKFERFQLLEG<br/> ERLEKEESALRVQIMQELDDIRLQRESFEASMEHERSALHEKAKLEQSK<br/> VIEDLEMTRRNLEIELQRRKEQDEKDLQTRVALFEDKKMIELSDINHQK<br/> QALNREMEEMLSKRSALQKESEEIAKHKEKLKEQQLMEMHNDIGELSTL<br/> SINLKKRREVFARERARFLAFVQKLKDCGSCGQLANEFVLSDLQLPSNE<br/> EEAILPPTGVLSDLPGSSDESDSCNIKSLDGDASGSGSRRPNTSILQK<br/> CTSIFFSPSKKTGHGINTDKSDQRPSSSVAVNMEKIGEKPLPVDLRPCPS<br/> NSSIPEEDEEYTDSDRVQETSEGSQLELQSAARRGRGRGRPRKVKPALNP<br/> KSLVKHAGPEESSKDELSDGRVSVTSKKTGGGGRKRQHIEDTATGGHR<br/> KRQQTAVLPPQTPGQRRYNLRRNKTDQVPADVEDNAAGGEDDADIS<br/> PSVPSKENVEETSESVMESLRARRLETSEVGVVERVVMVETIANLVTADN<br/> NGGVSVANAEPANITTSVVEDDQKQNTVNEEDDMNEEHEDGDDEEA<br/> EVQGDGDGDDDDDDDDDDGDDDDGDDDESPRPGEGSISKKLWTFLLT</p>                                                                                                                                                                                                                                                                                          |
| CRWN1 | Arabidopsis thaliana | AT1G67230.1 | <p>MSTPLKVVQRWSTPTKATNPDSNGSSHGTGLDMVTPVSGRVSEIQF<br/> DDPRILPEKISELEKELFEYQHSMLLLIEKKEWSSQYEALQQAFFEVNE<br/> CLKQERNAHLIAIADVEKREEGLRKALGIEKQCALDLEKALKELRAENAEI<br/> KFTADSKLTEANALVRSVEEKSLEVEAKLRAVDAKLAEVSRKSSDVERKA<br/> KEVEARESSLQRERFSYIAEREADEATLSKQREDLREWKLQEGEERV<br/> AKSQMIVKQREDRANESDKIIKQKQKELEEAQKKIDAANLAVKKLEDD<br/> VSSRIKDLALREQETDVLKKSJETKARELQALQEKLEAREKMAVQQQLVD<br/> EHQAKLDSTQREFELEMEQKRKSIDSLKSKVAEVEKREAEWKHMEEK<br/> VAKREQALDRKLEKHKEKENDFDLRLKGISGREKALKSEEKALETEKKKL<br/> LEDKEIILNLKALVEKVSQENQAQLSEINKEKDELRVTEERSEYLRQLTE<br/> LKEQIEKCRSQQELLQKEAEDLKAQRESFEKEWEELDERKAKIGNELKNI<br/> TDQKEKLERHIIHLEEEERLKEKQAANENMERELETLEVAKASFAETMEY<br/> ERSMLS KKAESERSQLLHDIEMRKRKLESDMQTILEEKERELQAKKLF<br/> EEREKELSNINYL RDVARREMMMDMQNERQRIEKEKLEVDSSKNHLEE<br/> QQTEIRKDVDDLVALTKKLKEQREQFISERSRFLSSMESNRNCSRCGELL<br/> SELVLPEIDNLEMPNMSKLANILDNEAPRQEMRDISPTAAGLGLPVTG<br/> GKVSWFRKCTSKMLKLSPIKMTPEPSVTWNLADQEPQSTEQANVGGPS<br/> TTVQAATTYSFDVQKAESGTKEVEVTNVNSDGDQSDINSKAQEVA<br/> ADSLSNLDVDGQSRMKGKARTRRRSVKDVVDDAKALYGESINLY<br/> EPNDSTENVDDSTKASTGETGRSDKAISKNGRKRGRVGLRTRCTTEQD<br/> GNESDGKSDSVTGGAHQRKRQKVASEQQGEVVGQRYNLRPRRV<br/> GEPALSKKNEDIGGVQQEEGIHCTQATATASVGVAVSDNGVSTNVVQ<br/> HEATADSEDTDAGSPKRTDESEAMSEDVNKTPLRADSDGEDDESDAE<br/> HPGKVSIGKKLWTFLLT</p> |
| CRWN2 | Arabidopsis thaliana | AT1G13220.2 | <p>MTPRSETHKIGGVTNPRNADRKKGAVAFSDDLVIPTLPPPIGTLTGQ<br/> GVSRGHTDDMDMGDWRRFREVGLLNEASMEKKDQEALEKISTLEK<br/> ELYGYQHNMGLLLENKELVSKHEQLNQAFQEAQEIILKREQSSHLIAL<br/> TTVEQREENLRKALGLEKQCVQELEKALREIQEENSKIRLSSEAKLVEAN<br/> ALVASVNGRSSDVENKIYSAESKLAATRKSSELKRLKEVETRESVLQ<br/> ERLSFTKERESYEGTFQKQREYLNEWKQLQGEESITEQKRNLNQREE<br/> KVNEIEKKLKEKELEEWNRKVDLSMSKSKETEEDITKRLEELTTKEKEA<br/> HTLQITLLAKENELRAFEELIAREGTEIQKLIDDQKEVLGSKMLEFELEC<br/> EEIRKSLDKELQRKIEELERQKVEIDHSEEKLEKRNQAMNKKFDRVNEKE</p>                                                                                                                                                                                                                                                                                                                                                                                                                                                                                                                                                                                                                                                                                                                                                                                                             |

|       |                      |             |                                                                                                                                                                                                                                                                                                                                                                                                                                                                                                                                                                                                                                                                                                                                                                                                                                                                                                                                                                                                                                                                                                                                                                                                                                                          |
|-------|----------------------|-------------|----------------------------------------------------------------------------------------------------------------------------------------------------------------------------------------------------------------------------------------------------------------------------------------------------------------------------------------------------------------------------------------------------------------------------------------------------------------------------------------------------------------------------------------------------------------------------------------------------------------------------------------------------------------------------------------------------------------------------------------------------------------------------------------------------------------------------------------------------------------------------------------------------------------------------------------------------------------------------------------------------------------------------------------------------------------------------------------------------------------------------------------------------------------------------------------------------------------------------------------------------------|
|       |                      |             | <p>MDLEAKLTIKEREKIIQAEKRLSLEKQQLLSDKESLEDLQQEIEKIRAE<br/> MTKKEEMIEEECKSLEIKKEEREYLRLOSELKSQIEKSRVHEEFLSKEVE<br/> NLKQEKERFEKEWEILDEKQAVYNKERIRISEEKEKFERFQLEGERLKKE<br/> ESALRVQIMQELDDIRLQRESFEANMEHERSALQEKVKLEQSKVIDDLE<br/> MMRRNLEIELQERKEQDEKDLLDRMAQFEDKRMAELSDINHQQAL<br/> NREMEEMMSKRSALQKESEEIAKHKDKLKEQQVEMHNDISELSTLSIN<br/> LKKRREVFGRERSRFLAFVQKLDKDCGSCGQLVNDVFLSDLQLPSNDEV<br/> AILPPIGVLNDLPGSSNASDSCNIKSLDGDASGSGGSRPPSMSILQKCT<br/> SIIFSPSKRVEHGIDTGKPEQRLSSSVAVGMETKGEKPLPVDLRLRPSSSS<br/> IPEEDEEYTDSDRVQETSEGSQLEFQSSRRGRGRPRKAKPALNPTSSVK<br/> HASLEESSKDELSGHVSVTSKKTGGGGRRKRQHIDDTATGGKRRRQQT<br/> VAVLPQTPGQRHYNLRRKKTVDQVPADVEDNAAAGEDDADIAASAP<br/> SKDTVEETVVETLRARRIETNADVSAENNGDVPVANVEPTVNEDTNE<br/> DGDEEEDAEQDDNEENQDDDDDDGDDGSPRPGEGSIRKKLWT<br/> FLTT</p>                                                                                                                                                                                                                                                                                                                                                                                                                                                          |
| CRWN3 | Arabidopsis thaliana | AT1G68790.1 | <p>MFTPQRNRWPETDRKGKAIAFSDEIITPPPQRVLLREDDDWQKFKEV<br/> GLLDEASLERKDRDALIEKILKLEKELFDYQHNMGLLIEKKQWTSTNNE<br/> LQQAYDEAMEMLKREKTSNAITLNEADKREENLRKALIDEKQFVAELE<br/> NDLKYWQREHSVVKSTSEAKLEEANALVIGMKEKALEVDRERAIAEEKF<br/> SVMNRKSSSELERKLEKETREKVHQREHLSLVTEREAHEAVFYKQREDL<br/> QEWKLLTLEEDRLSEVKRSINHREERMENERTIEKKEKILENLQQKIS<br/> VAKSELTEKEESIKILNDISLKEKDFEAMKAKVDIKEKELHEFEENLIERE<br/> QMEIGKLLDDQKAVLDSRRREFEMELEMRRSLDEELEGKKAIEQLQ<br/> VEISHKEEKLAKREAALKEEGVKKKEKDLARLKTVKEKALKAAEEK<br/> KLHMENERLLEDKECLRKLKDEIEEIGTETTKQESRIREEHESLRITKEERV<br/> EFLRLOSELKQQIDKVKQEEELLLKEREELKQDKERFEKEWEALDKKRA<br/> NITREQNEVAEENEKLRNLQISEKHLKREEMTSRDNLKRELDGVMKQ<br/> KESFEADMEDLEMQRNLDMEFQRQEEAGERDFNERARTYEKRSQE<br/> ELDNINYTKKLAQREMEEMQYEKLALEREQISVRKLLKEQEAEMH<br/> KDITELDVLRSSLKEKRKEFICERERFLVLEKLKSCSSCGEITENFVLSDLR<br/> LPDVEDGDKRFGKQKLKAAEALNISPASAENSKRTSLLGKIASKLLSISPIGK<br/> TDKVTDLGITVKLPESQPDSDSLDRVSGEDHEPSATEQSFTDSRIQEGP<br/> EGSLQSEMKS DKPRRGRGRGRGKSVRGRSQATKAVSRDSKPSDGE<br/> TPRKRQREQTSRITESEAAGDSDEGVDSITTGRRRKRQIAVPSQTP<br/> GQTRYQLRRHRNVGTEEDKAQASKGATEKQERVNDDIRKVPSPKETR<br/> TPPEGENRENGKAEVLVETVTHEEIVTVETETVFKVNNTGKNPVEDPQ<br/> LEVGGSGEIREHGEEEDDENISMIEEENEHEEEEEETERQGNDA SIGKKIW<br/> VFFTT</p> |
| CRWN4 | Arabidopsis thaliana | AT5G65770.2 | <p>MATSSRSERFPITPSTAATNRLTITPNSRVLKSPLTEEIMWKRLKDAGFD<br/> EQSIKNRDKAALIAYIAKLESEVYDYQHNMGLLLLEKNESSQYEEIKASV<br/> DESDLTHMREKSAYVSALAEAKKREESLKKDVGIAKECISSEKTLHEMR<br/> AECAETKVSAGSTMSEAHVMIEDALKKLADAEAKMRAAEALQAEANR<br/> YHRIAERKLKEVESREDDLTRRLASFKSECETKENEMVIERQTLNERRKS<br/> LQQEHERLLDAQVSLNQREDHIFARSQELAELEKGLDTAKTTFFEEERKA<br/> FEDKSNLEIALALCAKREEVCFYSHNSLLFLVLHYRSSKFLGDKIAVSE<br/> RESSLLKKEQELLVAEEKIASKESELIQNVLANQEVILRKRKSDVEAELEC<br/> KSKSVEVEIESKRRRAWELREVDIKQREDLVGEKEHDLEVSQRALAEKEK<br/> DITEKSFNLDEKEKNLVATEEDINRKTMTLEDEKERLRKLDLELQQSLTSL<br/> EDKRRKRVDSATQKLEALKSETSELSTLEMKLEELDDLRAQKLEMLAEA<br/> DRLKVEKAKFEAEWEHIDVKREELRKEAEYITRQREAFSMYKDERDNI<br/> KEERDALRNQHKNDVESLNREREEMNKMVEEHSEWLSKIQRERADF</p>                                                                                                                                                                                                                                                                                                                                                                                                                                                                                                          |



|      |                 |                                       |                                                                                                                                                                                                                                                                                                                                                                                                                                                                                                                                                                                                                                                                                                                                                                                                                                                                                                                                                                                                                                                                                                                                                                                                                                                                                                                                                                                      |
|------|-----------------|---------------------------------------|--------------------------------------------------------------------------------------------------------------------------------------------------------------------------------------------------------------------------------------------------------------------------------------------------------------------------------------------------------------------------------------------------------------------------------------------------------------------------------------------------------------------------------------------------------------------------------------------------------------------------------------------------------------------------------------------------------------------------------------------------------------------------------------------------------------------------------------------------------------------------------------------------------------------------------------------------------------------------------------------------------------------------------------------------------------------------------------------------------------------------------------------------------------------------------------------------------------------------------------------------------------------------------------------------------------------------------------------------------------------------------------|
|      |                 |                                       | <p>LLGIEMQKRELEYCIENKRELEENSSRDREKAFEQEKKLEERIQSLKEM<br/> AEKELEHVQVELKRLDAERLEIKLDRERREREWAEKDSVEELKVQREKL<br/> ETQRHMLRAERDEIRHEIEELKKLENLKVALLDDMSMAKMQLSNERS<br/> WEKVSALKQKVVSRRDDELQNGVSTVSNSEDGYNSSMERQNGLTPS<br/> SATPFSWIKRCTNLIFKTSPEKSTLMHHYEEEGGVPSEKLLKLESSRREEK<br/> AYTEGLSIAVERLEAGRKRRTSGDETSSEPSNKKRKHVDVTQKYSDE<br/> ADTQSVISSPQNVPEDKHELPSSTQTPSGMVVISETVKITRVTCETEV<br/> TNKVTTLDCESESPSEAGRKMGEETEDGDCNQVFMNSLKKNCLQTLQ<br/> QMNNTLWFL</p>                                                                                                                                                                                                                                                                                                                                                                                                                                                                                                                                                                                                                                                                                                                                                                                                                                                                                                                     |
| Csa1 | Cucumis sativus | Phytozome<br>12<br>Cucsa.23818<br>0.1 | <p>MFTPQKVWSGWPLTPKTGAQKTGAGSASNPNSVTPNLSRKGDGIGK<br/> KTVAFGETTTPLSGALVENGEMFVGSAAEALDQEGLAEKISRLLENL<br/> FEYQYNMGLLLIEKKDWTLKYEELKQALAETKDTLKREQMAHMIAISD<br/> AEKQEEENLKKALGVEKECVLDLEKALREMRAENAEIKFTGDSKLAEANA<br/> LVTSIEEKSLEVEARLRAADAKLAEVSRKNSEVERKLQDLEAREGALRRD<br/> RLSFNAERESHEATLSKQRDDLREWERKLQDAEERLAKGQTLNQREE<br/> RANESDRMVKQKEKDLEELQKKIDSSNLALKRKEEDIGSRLANIALKEQ<br/> ESDSLKVSLEIKEKELLVLEEKLSAREKVEIQKLLDEHNAILDAKKIEFELEI<br/> DQKRKSLDEELKSKVSEVEKKEAEIKHMEEKVKGREQALEKRTEKFEK<br/> EGDYDAKFKALKQREKSLKLEEKNEAEKKQLLADTEELISLKAEEVKIRA<br/> ENEAQLLKLHEERESLKVSETERSDFLRLQSELKQEIERYQQKELLKEA<br/> EDLKQQKETFEREWEELDEKRAQVEKEQKTLQLLQKEEFKRFSEERLK<br/> SERLETEAYIHREQENLKLQESFAASMEHEKSAIAEKAQSDRSQMMH<br/> DFDLQKRELESAMQNRVEEMERGFREKDKLFKEEKERELENIKFLRDV<br/> ARREMDLKLRLKTEKERQAEANKEHLERQRIERKDIEELLELSNKK<br/> DQRERLVAERDRFISYVDKHVTCCKNGEIASEFVLSDLQYLDGFENADV<br/> LNLPLGPKDYMEIQGLQVSVSPGGNLGGAGQKSPISAGTISWLKCTS<br/> KIFKFSFGKIVSPAFAEKQDDEAPVSDEHDDLAEPSKRMSVGEDEVELS<br/> LAIASDSDLDRRIQSDVSGRDVEPSQNLSDNQSNIQSVKPEVAVDSQP<br/> SDVRENKRPKRGPKNRTRSVKAVVEDAKAIIGELQPTQQAEPNG<br/> NAEDSSQLNNESSRDESSLAGKGTQRNLRKRTRANSSQIMGENDHDDS<br/> EVRSGSVVEGQPRKRRQRAAPAVRAPEKRYNLRKRVVVGASKEPSNISK<br/> EHEEVGTVNRREEDVHYSRVRPTPSMGVASDNAGSAHLVRCGTVQD<br/> NQDDGVAGTSKISIDMVSQSEEVNGSPENAGKYEDHGGEYRSESCVEV<br/> GNEDDDDEEESAHPGEVSGKKLWTFFT</p> |
| Csa2 | Cucumis sativus | Phytozome<br>12<br>Cucsa.10349<br>0.1 | <p>MAS PQSAGLTSSGKLSLTPGSRVLQTPLADEAIWRRLLKEAGFDEESI<br/> KRRDKAALIAIYIAKLEAEMFDHQHMGLLILERKELASDYEQMKSKAE<br/> TAE LMYRRDQAAHLSALTEAKKREDNLKKAIGIKECVASLEKALHEMR<br/> LES AEIKVAAESRLAEARIMMEDAQKFFVEAEAKLHAAESLQAESNRC<br/> NRAAERKLHEVEAREDDLRRRMACFKSDCDKKGEEIVLERQSLSERQK<br/> ALQQEHERLLDGOALLNQREEYILSKTQELSRSEKELEELRASIENERRA<br/> VHDEKSKMQLYEASLSKREEAVNRMEIMMNRQQLLVLEEKIATKET<br/> NEIQKVVANHESTLRTKISDFDAELQIKQKAVEDEIESKRRAWELREMD<br/> LKQRDEQILEKEYDLEVQSRSLVAKEKEVEELSKSLDEKKNLKALEQELE<br/> LSKVLLQKEKDECSKMKRDLQCSLDSLEDRRKQVDCAKDKLEAFRSETN<br/> ELSLEMKLKEELDSVRVQKLELMDEADKLMVEKAKFAEWEMIDEKR<br/> EELRTEAEILAAERLAVSKFIKDERDGLRLEREVMRKQFKNDREILSRERE<br/> EFLNKMT CERSEWLNMQQERKDLLMDVEAQKKELENCLEQRREELE<br/> GQLREKLNFEQEKKNELDKINFLKDKATKDLEEVALETKKLETERMEIN<br/> LDRERRNREWAELNNSIEELKVQREKLEKQRELLHADREEILADIERLKK<br/> FENLKV ALDNMAVAEMNQSDLDVAQPISYPRRRPLVRDAEHQIDTQK<br/> ITNGFDSPSVLKV DGLPPTSTRFSWIKRCSELIFKQSPERERAPTRYPKV</p>                                                                                                                                                                                                                                                                                                                                                                                                                 |

|      |                 |                                          |                                                                                                                                                                                                                                                                                                                                                                                                                                                                                                                                                                                                                                                                                                                                                                                                                                                                                                                                                                                                                                                                                                                                                                                                                                                                                                           |
|------|-----------------|------------------------------------------|-----------------------------------------------------------------------------------------------------------------------------------------------------------------------------------------------------------------------------------------------------------------------------------------------------------------------------------------------------------------------------------------------------------------------------------------------------------------------------------------------------------------------------------------------------------------------------------------------------------------------------------------------------------------------------------------------------------------------------------------------------------------------------------------------------------------------------------------------------------------------------------------------------------------------------------------------------------------------------------------------------------------------------------------------------------------------------------------------------------------------------------------------------------------------------------------------------------------------------------------------------------------------------------------------------------|
|      |                 |                                          | NPINQADQSSSISGQLFQSPFEMDRGNEKSQRTITERQDVKYAIGEPK<br>VIVEVPPANKNMNGVPLVESEIVDDVTLSDHRVLTGKKRRATNITHPD<br>SLGQLEFENNNKKQRQEEISGDPTEDDSSCPEEATQMNMPEDPKAFV<br>SSTDNQENAKEAEVIVSTDINIIEVTTYKQKNSDMSSDHQETISEKC                                                                                                                                                                                                                                                                                                                                                                                                                                                                                                                                                                                                                                                                                                                                                                                                                                                                                                                                                                                                                                                                                                |
| Csa3 | Cucumis sativus | Phytozome<br>12<br>Cucsa.28083<br>0.1    | MFTPQRTGWPAASLTPrTEPKLALtNSIILGKGKDVtFTDDPPpPLGSL<br>NDELYKTATAVDTGDMDDWRKFKKAGLLDAAAMERKDREALLEKAS<br>RLQSELLDYQHNLGLLIEKKDWASKFDELGQDLAETEEIFKREQSAHLI<br>ALSEVETRRDNLKALAAEKQHVSSLKMAFYEVNEERAEIKLTSQKKLA<br>DANALMHGIEEKSLELQKKLNAAEAkLAEVNRKsSELEMRMHEVEAR<br>ESVLQTEQISLVTGKEAHEATSHKERESLRKWQQKQEREEKLSKSRELL<br>NDKEQKvSENSTTMKQEKDLEEMKKKIDLSSSVQKGEDNVNRRLA<br>DVEAKEKEADFSRSLEKKQEELRQMEENLHGREMMEIQLLDEQRVI<br>LQKKKEQFELQLEEKROSLDNEGSTVLGALKRKDLEINHEKEKLVKQEQ<br>ALDKLLRAKEKEGDLEQIKITLKS KDRIKADeKKLEVERLQMLADRES<br>LRLSINEIEEIRTENSQKEQQFHEERAKLQVMKEERSEHVRLECQLMQE<br>IESYRLQNKIVMKEHEDLKQERVKFERDWEALDEKRTEIHDELSDLVEE<br>RKKLEILQGAEEGRLRNEKNEMLIYMQRELENVKQEKELFASTTRQEQ<br>QALSEQAQTKHSQLLQDIEFQRKDLESHLQNSQMELEKERQERELAFE<br>EERERERNKLFCLRDIAQKETDDLLSERHQLEKEKEVVS LNRKQMIADH<br>LEIHQDIDKLNILSKELKIQREQLIRDRVCFLTFVDKHKSCGKCGVSIIEFV<br>VPDLQIPEEIRKSHPLPKLDANSLQTLQREFAASEFDSSDSSGGRMSWLR<br>RCSRKILKLSPIKKIGHVVPSPMKLAADCTDLEVKEPRVNVGDV KRSGI<br>ADEPQQSSFIeSPSGVQRFSFSDNIRLAENRHEHTLDDFNLD SKFEE<br>ASEASKQPDMMKKERPKHAKGLKSGHRTRSVKATVQDAKAF LGETGGQ<br>SDLNVPVQSDSNSLYKETSNIKRPLPEDEQDDSEGCSDSITTVRQRK<br>RQQKILPVQTQGESRYHLRRHKNP GKASAVQVSPNLTTVM EKENEETL<br>AVGGENGEKMDSVKITTVRTIYHSEDRVRFESQR TAEDNAPTEKLV T<br>TVNDLCDEVNGSSEYEDeDQSiLDDEDEYDEEQPDVGSIGKKIWTFFTT |
| Csi1 | Citrus sinensis | Phytozome<br>12<br>orange1.1g0<br>48767m | MFTPQRKALSGWSLTPRGEKNGTGSVSNPTTVDGLTGKGKSIVAFTEP<br>RTPQNGVGLADDVESLAEKVSKLENELFEYQYNMGLLLIEKKEWSSKYE<br>ELKQTFAEAKDALKREQA AHLIAITDVEKREENLRKALGVEKQCVL DLE<br>KALREMRSENAEIKFTADSKLAEANALVTSIEEKSLEVEVKLRSDAKVA<br>EINRKSSEIERKSHELESRESALRMERASFIAREAYEGTFSQQREDLRE<br>WERKLQDGEERLVKGQRIVNQREEKANEKEKIFKQKEKDLEEAQEKID<br>ATNLSLMRKEDDINKRLANLITKEKEYDAARKSLEMKEEELRQLEEKLN<br>AREKVEVEKLLDEHKASLDAKQREFDLEIDQKRKAFDDDLKSKVVEVEK<br>KEAEINHKEEKIAKREMALEKRLEKCKDKEKDVESKLDLNGREKTMKS<br>EENLETEKKQLLADKEDILTEKAELEKIRDANEQQLLIYEEKNQLRISE<br>EERAEYLRQLSELKEQIGKCR LQEEMLLKEAEDLKQ QKENFEKEWEQL<br>DEKRAEVEKELKKISEQTEKLEKEKLS EEEKIRDKQLAEDHIKREWEALE<br>VAKESFKATMDHEQSMITEKAESERRQLLHDFELQKRKLES DMQNRQ<br>EELEKDLKEKERLFEEKERELSNINYL RDIARKEMEEMKLERLKEKEKQ<br>EVDShRKHLEGEQVGIRKIDMLVGLTKMLKEQREQIVKERDRFLNFV<br>EKQKCEHCAEITSEFVLSDLVQEIVKSEVPPLPRVANDYVNEKKNSEM<br>SPDV LASGSPASAGTISWLRKCTSKIFLSPSKKDENTV VRELTEETPSSG<br>GQTKLQESSRRLGQTNepDLsFAIVNDSFDAQRFHSETSTREVEADQH<br>KQVDGQNNLNGKAPEVQENSQPSDLNHGRQPRKRGRPRVSRTRSVK<br>AVVQDAKAILGEGFELTESEN LNGNADDSVQEA AESRGEP SLDDKGTS<br>RNARKRNRAQSSQITTSEHDVDDSEAQSGSVVVGQPRKRRQKVDPAE<br>QTPVPTRYNLRRPKT                                                                                                                                    |
| Csi2 | Citrus sinensis | Phytozome                                | MASPSSGRLAITPSSRVLQSPLSDES IWKRLKEAGLDEVSIKRRDKAALI                                                                                                                                                                                                                                                                                                                                                                                                                                                                                                                                                                                                                                                                                                                                                                                                                                                                                                                                                                                                                                                                                                                                                                                                                                                       |

|         |                 |                                          |                                                                                                                                                                                                                                                                                                                                                                                                                                                                                                                                                                                                                                                                                                                                                                                                                                                                                                                                                                                                                                                                                                                                                                                                                                                                                                                                                                                                                                            |
|---------|-----------------|------------------------------------------|--------------------------------------------------------------------------------------------------------------------------------------------------------------------------------------------------------------------------------------------------------------------------------------------------------------------------------------------------------------------------------------------------------------------------------------------------------------------------------------------------------------------------------------------------------------------------------------------------------------------------------------------------------------------------------------------------------------------------------------------------------------------------------------------------------------------------------------------------------------------------------------------------------------------------------------------------------------------------------------------------------------------------------------------------------------------------------------------------------------------------------------------------------------------------------------------------------------------------------------------------------------------------------------------------------------------------------------------------------------------------------------------------------------------------------------------|
|         |                 | 12<br>orange1.1g0<br>02268m              | <p>AYIAKLETEIFEHQHHMGLLILEKKEKELASKYEQIKASAEAAELLQKHDRAS<br/> HLSAIAEARKREESLKKTLGVEKECIASLEKAVHEIRAESAETKVAADSKF<br/> AEARCMVENAQKKFAEAEAKLHAAESLQAEANRYHRSERKQEVVA<br/> REDDLSRRIASFADCEEKEREIIRERQSLSDRKKILQQEHERLLDAQTLL<br/> NEREDHILSKLQELSRKEKELEASRANVEEKFKALNEEKSNLDLTLVSLK<br/> REEAVIEREASLQKKEQKLLVSQETLASKESNEIQKIIANHESALRVKQSE<br/> FEAELAICYKLAEDEIEKKRRRAWELRDLDLGGQREESLLEREHDLEVQSR<br/> LVDKEKDLVERSHELLLEEKENKLIAFEKEADLKKSLQKEKEEVNIIKSDLQ<br/> KSLSSLDEKKKQVNCADKLEAMKSEAGELSVLEIKLKEELDVVRAQKLE<br/> LMVETDKLQLEKAKFEAEWEMIDEKREELRKEAERVAVERVVVSKSLK<br/> DERDSLQRERDAMRDQHKRDVDSLNREREFFMNKMOVHEHSEWFTKI<br/> QQRADFLGIEMQKRDLENCIEKRREELESSFREREKAFEEKMRFEQ<br/> QISSLKEKAKELEQVTLKRLDLERMEINMDRQRDRDREWAELNNSIE<br/> ELMVQRQKLEEQRQLLHADREEIQAESERLKKLEDLKIADVMAVSEM<br/> QRSRLEHSQKKISAKRHLNQQTSLAHADLGSDQKFDVTNNGDRFNTP<br/> SVQKTASASPPSLARFSWIKRFADLVFKHSGENSVENDEEKSPSDHED<br/> ASLTINSRKRQPVRYSGEPKVILEVPSENEVVKRTVDLESENQNAAQ<br/> KCKQSVSEGGIHAARKRRVDVDCVDPSELLMQNNKRRKQQEDFPRNS<br/> SEEAINHGC</p>                                                                                                                                                                                                                                                                                                                                                                                                   |
| Csi3    | Citrus sinensis | Phytozome<br>12<br>orange1.1g0<br>00847m | <p>MFTPQRRPIPATKLTPRGTEAQSSGAISNARNIKGKAVAFATQSVPPP<br/> PPVNSLLDYNNGSATVFPAAEEDDWRRFREAGLLDEATMERKDREAL<br/> MEKVSLEKELYDYQYNMGLLLIEKKEWTSKIEELRQSFEEQEIILKREQ<br/> SAHLIAFSEAEKREDNLRRLSMKQCQVADLEKALRDMGEERAQTKLF<br/> SEKTLTDANTLLGGIEGKSLEVEEKFHAAEAELAENRKSSELEMKLQEL<br/> ESRESVIKRRERLSVTEREAHEAAFYKQREDLREWEKLLQIGDERLSELR<br/> RTLNRQEVKANENERILKQKERDLEEKIDLSSSKLKEREDEINSRLAE<br/> LVVKERVGFLAYLIYLLYFICAYSLPSFSYNVLLNFFFQADCLRSTVEMK<br/> EKRLLTIEEKLNRARVEIQKLLDDQRAILDAKQQEFELEEKRSIEEE<br/> MRSKISALDQQEFEISHREEKLERREQALDKKSDRVKEKENDLAARLKS<br/> VKEREKFKAEKLELEKQKLIADKESLQILKVEIDQIESENAQQELQIQ<br/> EECQKLKINEEEKSELLRLQSQLKQKIETYRHQQELLLKEHEDLQDREK<br/> FEKEWEVLDEKRDEINKEQEKIADKLEKLEKQHSAAERLKKEECAMRD<br/> YVQREIEAIRLDKEAFATMRHEQLVLSEKAKNDRRKMLEEFEMQRM<br/> NQEAELLNRRDKMEKELQERTRTFEKRRERVLNDIAHLKEVAEAGEIQEI<br/> KSERDQLEKEKHEVKVNREKLEQQQLGMRKDIDELDILCRRLYGDREQ<br/> FKREKERFLEFVEKHTSCKNCGEMMRAFVISNLQLPDDEARNDIPLPQ<br/> VAERCLGNRQGDVAAPYDSNISNSHGGMNLGRADSGGHMSWLKRC<br/> TSKIFSISPIKKSEHISTSMLEEEEPQSAVPTIMQEKAEGPGVLSKEAIGY<br/> SIPEDPQSSFRVNDSTNREMDDEYAPSVDGHSYMSKVEDVAEDS<br/> QQSELRSKRRPGRKRKSGVNRTRSVKAAVEDAKLFLGESPEGAGLNA<br/> SFQAHEDSQGISHTQEASNMAKRRRPQTSKTTQSEKDGADSEGYS<br/> DSVTAGGGRRKRHQTAVTVSQTGERRYNLRRHKTSSAVLLEASADL<br/> SKANKTVAEVTNPVEVSNPKSASTFPPAVLNENGGKSTHLVQVTSVKS<br/> MELSRDRAVRFKSTTNIVDENADAPKSIENTVLSEEVNGTSEYVDEDEN<br/> GGRVLEDEEDDDDDSDHPGEASIGKLLWNFFTS</p> |
| DcNMCP1 | Daucus carota   | NCBI<br>BAA20407                         | <p>MGRVEDMGLNAKLMKLETELFDYQYNMGLLLIEKKEWTSKFEELQVQV<br/> YTETKDALKQEQEAHLIAISDAEKREENLTKALGVEKQCVLDLEKALRD<br/> MRSDYAEIKFTSDSKLAEASALITKVEEKSLVESKLHSADAKLAELSRKG<br/> SDIERKSHELEARESALRRERLALNAEREALTDNISRQREDLREWERKQ<br/> EDEERLAEVRRLLNQREERANENDRLYQQKQSELDGEQKKEIIMVSLK<br/> NKEDDISRIAKLNIKEKEADAVKHSLEVKEKDLTEFEQKLNAREQSEIQ</p>                                                                                                                                                                                                                                                                                                                                                                                                                                                                                                                                                                                                                                                                                                                                                                                                                                                                                                                                                                                                                                                                                                 |

|              |               |                  |                                                                                                                                                                                                                                                                                                                                                                                                                                                                                                                                                                                                                                                                                                                                                                                                                                                                                                                                                                                                                                                                     |
|--------------|---------------|------------------|---------------------------------------------------------------------------------------------------------------------------------------------------------------------------------------------------------------------------------------------------------------------------------------------------------------------------------------------------------------------------------------------------------------------------------------------------------------------------------------------------------------------------------------------------------------------------------------------------------------------------------------------------------------------------------------------------------------------------------------------------------------------------------------------------------------------------------------------------------------------------------------------------------------------------------------------------------------------------------------------------------------------------------------------------------------------|
|              |               |                  | <p>KLLDEHKAILEVKKQSFEMEMDKRKNDFENDLQNRAVEVEKKEVEVK<br/> HLEAKLAKREHALDQKHEKLEKEQYLASKLQDLNEREKSMKLEENKIE<br/> DERNQLLSDKQEMLCCKAEIEKDRASTEEOQLKLSSEIERLKITEERLEL<br/> ARLQSELKQEIENCRHQRELLKKEEDELKQEKMRFEKEWEDLDERRTAL<br/> MKDLKDITVQKENFEKLNHSEEDRLNKKLDTESYVQKELDARLTKDS<br/> FAATMEHEKAVLAERTSSEKKQMLNDFELWKRELETKLFNEREDMEN<br/> ALRLREKQFDEEREKELNNINYIKEVISKEREDIKLERSRIAKEKQEILMH<br/> QKHLDEQHVVMQKDIGQLVSLSEKLDQREQFFKERECEFIRFVESQKS<br/> CKNCGEMTSEFVVDLQSLAELENLKALSVPQLAENYLRQDLQGTDPK<br/> NLSTVTPGAVGLGSPASGGTKSWLQKCTSKIFIFSASKNNSPDQNTSR<br/> RLHVEASPNKLLNTEVIPELPSGVAGETLEMQNMQVSNREMEMSNL<br/> NLSGTEQSNIDSKALDVEDSQSDVRAGNRKPGKRAKGRVRRKRSKAK<br/> EVAEEAKTVLADPIELNENEHSNGLASAYTNESRGDSSLVGRTRNSRK<br/> RNPSQPSQSAAGDVGADSEGHSDSVTAGGRQKRRRQVVPVAVQAPTG<br/> RYNLRRHKTAAPLVANGALSDPNKGKEKEIDDGGGIGEEIPDEVDGNT<br/> HLVQVTTLKCRINVVNEFSSAGFHGINATSESDRDAANQLVSDTMLSL<br/> EEVNGTPEQSRGYQNGQDTSAGAEDEDEDGDEVEHPGEVSMRKKVW<br/> KFLTT</p>                                                                                                      |
| DcNMCP2      | Daucus carota | NCBI<br>BAI67718 | <p>MASPRLTVIQSEKTTVTSSRVSRSMSDDDIWKRLQEQAGFDEDSIKRRD<br/> KASLIAYITKLEAEIYDHQYQMGLLIMERKEWGSKFERVEAALNSAELM<br/> RKHDKNLYLKDLAEAKKREENLKAIEIERECLANIEKTLHELRAEYAETK<br/> VMADSKLVEARSMIEDALKKLESEADAKKHAESLEAEASRYHSAERKL<br/> HEVEAREDDLRRRATSFKTECDTKEEELHERRLLNERQKALQQSQRL<br/> VDGQDLLNKRESHIFERTQELNRKEKELEASKLKQEEELQALVEQQANL<br/> ETKASSLSLREEVITKSELEVKKREEELCVLQEKLEKESERIQQLLANEYEA<br/> SLSMKKSEFEAELEVKRKSVHDDIENKRRDWELREVDLHHREELILEKE<br/> HELEMQSRAVVDKERDLAQRFSLLEEKENRLHAVEKEIESKEALLQKEK<br/> EEIISKLDIQRSLDALEDEKQQLHHAEEKMEAMKSETNELCVLESKLKE<br/> EITIRAQKQELETEADEMKELKLFIEWQSIDEKRKELQKEACINEQ<br/> RESLELTLKDERNSLLEKEDAMRDEYMRNNESSRDREDFMCKMEHE<br/> RSEWFSKIQRSDYLLAIEVQSKDLEDRLAKRREEIESYLAERERAFEEE<br/> KKKELMRMDTLRETLARETEQVNAELNRLDTERREINLDRERRDREWA<br/> ELNTLIEELKVQRQKLEKQRELMRADKEEILVQIEHLKQLEDLKVVPDRI<br/> ALTDIQQSDLQPSKRVSARRSLKROSGLDSCRAEDNGNASSGNGSVI<br/> LSPPLSSPFSWLKRCASSLLEQKVSNNKMRHSEEIITPSTIPARLNAPDDE<br/> HAVISANQQTPVHAKETTVYIDKIITIREVTSFNDAIVDGNQNLLEALS<br/> QRAEEKLEDDNIESEKLEKNGEVDPKIMQASLTEQ</p> |
| DcNMCP3<br>I | Daucus carota | NCBI<br>BAN14787 | <p>MFTPQKSNTNRSNLIPTTTMSHTNPRSTNKAKSVFVNDPAPPRALLG<br/> GDYVAVERGEEEDWRRRFREAGLLDEAAMERRDRDAVVEKVAKLEREL<br/> FDYQYNMGLLMEKTEWTLKYEEMRRAQVELKEVLEQEQTTHLILLSE<br/> SEKREENLRKALDMEKKCITDLEKALRDSGADNAQTKQSSEAKMVKA<br/> NALLSGFKEKSMDVETKLHVADAKLEEYKTSLELERKLQEVETRDSLL<br/> QRERMSFIAEREAHEATFSIQKKDLQEWKLLQEAERLCEIRRTTSGR<br/> EVKVNEMEMALNKKQELNKAQKENDLSTSVLKEADDINHRLANLT<br/> AQEHKAETLRNELEMRDKELLALAEKLTARESVEIQTLLEQQAVLDAK<br/> MQEFEVDMDGKRKSLDEEMRSKLDVAVQYKKEITHIEEKLNRLELSLE<br/> NKSERIKEKEKDLESKLRCLKDKESLLKSEKRLDLEKHHMLADKDTLQT<br/> LKDEIEKTRADISQQSQKIQEEIVKLIKISEDERAERYLRSELKEIEKCRFE<br/> KELLLKAHKNLKDERSFEEKWEALDERSNALSREIKLIGEEKEKFEKFR<br/> SMEEKIKNDRLATEDYIRRELETLETEKETFATITRQEQSLISEKAELEYSQ<br/> MLHEFELRRKDLEVDIQKRRDELESHMSEREREFEEEREKEHNNISRLK</p>                                                                                                                                                                                                                                                                           |

|               |                         |                   |                                                                                                                                                                                                                                                                                                                                                                                                                                                                                                                                                                                                                                                                                                                                                                                                                                                                                                                                                                                                                                                                                                                                                                                                                                                                                                                                              |
|---------------|-------------------------|-------------------|----------------------------------------------------------------------------------------------------------------------------------------------------------------------------------------------------------------------------------------------------------------------------------------------------------------------------------------------------------------------------------------------------------------------------------------------------------------------------------------------------------------------------------------------------------------------------------------------------------------------------------------------------------------------------------------------------------------------------------------------------------------------------------------------------------------------------------------------------------------------------------------------------------------------------------------------------------------------------------------------------------------------------------------------------------------------------------------------------------------------------------------------------------------------------------------------------------------------------------------------------------------------------------------------------------------------------------------------|
|               |                         |                   | EVAQKDMEEELRSEKRRIEKDRQEIALKKKELKEHQLEMHKDIDELEVLN<br>KKVKIQREQFIKERDRFLFVDTLKSCNYCGGCTREYELSDLQLEKEIDN<br>SPIVELGPGVSYESQDRINLRSSNSGGHISWLQKCTSKIFKYPGKAAQD<br>SEFQSDMLATVEEDERPSDGHLETRGLNIANDGPEPSFGIANESCEIHL<br>LASNDNKRADQRHEICTDELSNIDSKAPVAPEDSQQSELSSGRRRPG<br>KKTRSGSVAVGTTKRKRQAQPSGVMKSAVTADHSEEHSVSEVGRR<br>KRQQSVTSSVQTPGEKRYNLRNKIVGTSGSALASVDLVKVESEVDVN<br>KTETVQDYALASSQVIASEKDNPTGPLEDMTCRSLIYDLSTEGDVELKT<br>SKSRDKSIDPAIMGNIEFNNEVNSTIPECSIENGRGSTLHEDRDNEVEVE<br>VLNEDEDLDIDSEGVDVSIHKKLWTFLLT                                                                                                                                                                                                                                                                                                                                                                                                                                                                                                                                                                                                                                                                                                                                                                                                                         |
| DcNMCP3<br>II | Daucus carota           | NCBI<br>APO14219  | MFTPQRKNWGNFTTTPRGPSPKSSDKGKSVAFDGPSPRSILTESHTVA<br>VSRSDIGDVEDWRRFTEAGLLDEASMEKKDHQALLEKIAKIERELYDYQ<br>YNMGLLLIEKKEWTLNSENREALAETQELLKREQTAHLISLSQVEKREE<br>NLRKALETEKKCVGDLEKALKEVRAEHAQMKQSFEAKLVNTDFLKSGL<br>EEKSLDVEKKLHVADAKFAEVTKKSLLEDRKLQEVETRDSLLQRRERLSFIA<br>EREAHEATYNKHKKDLHEWERKLQEGEERLCEGRRICNQREEKVNIEIE<br>RDFRLKETKLKKAQEEIDSSKSALEKAEDDIEHRRAKLTAEHAKALRS<br>DLETKEKELETKEKELLALAEKLSVRERVEIQKFLDEQAVLDARRQFEFAE<br>MDGKRKSLDEEMRCKMGALCDKEVAINRQGEEDLGKLEQSLQNNSE<br>RFKEKEEDLEAKIKELKEKEEVLKSDERRLDMEKKKISVDENILQTLKHEF<br>ERTKTDVSQKLKISEEERAEYLRLQSQLKQEIYQHERDLLRERESLKE<br>DRKHFEWEALDERNTALNRELREFGEEKEKFEKMRLFDEDRKNER<br>LAMEKHFKVKLEALETEKESFATVMRHEQALLSEKSKAEHSQMLLDFEL<br>RKKNLEDDMQRRKDELETHVHDRERAFNEEKEKEYSIKSLKEAVQKD<br>MEELRSERSRIEKVEQEIALNKKQLEEHQLEMNKDIVERLDDLLNKKVKLQ<br>REQLIKERDRLLAFVDRLKSCNHCGETREYELSDLQQQLETEYKLSPLS<br>RSGHGRVYKVQDGTDLTSSNSGGHISWIKRCTSNIFKYSNPETAQYSKS<br>QSDMLANVDEKDEGPSACDLASRGLRKAEDGPEPSLGLANESSDVHL<br>VTLKTDREVAEGHDICTDEFSNINSTTAEAPEDSQQSELKSGRRRRSRKP<br>KVGIHRTHSVKAVVGDAAVILGRTSAGKLGDNVPHESADVNEESRGDS<br>SYGEKALGTTQRRKRAQTSRVTVSEVAGDYSEECSESVSEVGRRKR<br>RQTVVSSVQTPGERRYNLRRNKTVGTAASAQASVNTENMQSKVNV<br>KVEAVQNPKDAPTRSLKIAPEKSNPTTFIQVTANKSVQFQDLLAENDAK<br>LKTFFETPEKSIEQLVIAENIGFSEEVIAMTPEGRVGAERGSTLHEDGDNG<br>LEDPDNAEDVDDEPENPGEVSIHKKIWFFTT |
| Dct1I         | Dendrobium<br>catenatum | KEGG<br>110102645 | MFTPQRKGWAGLGLQENGSVVRANPRSSLGGLVLRGKGVVGAETP<br>VPPPKGLLDKGERADIGVGGSGSEDWKRFRSGLLDEKVLRRDKE<br>VLTGRVSALEIERDECLYNMGLLLIEKNEWSSQIEELRQALAEAEQILKR<br>EEAAHIIAVSELEKREDNLKALGIEKQCVVDLEKALREMRAEVSETKFS<br>ENKLANAHAEASLEEKQLQIESKLHAADARLAEANRKNSELDRKLEDL<br>EARERKAQRELSLHTEKAFENDLSKQRDHLEWEKELQEQRRLLDE<br>QRLNREERANDLDLILKKKEVEVEEARKKIDVTSSTLKSQEDDYKVR<br>RALTMREKGVKSSNLEKKEKDLMEVEEKLNAREREEIQKLLDEHNAIL<br>DAKKQEFELMAKKRRSFNEEVKNHMDMLGDKDNIVRCKEEQLLKRE<br>NALEIEADELKNKEKDIDSKSKALKEWEDSLKTDEKLLQEQRKQVLKDF<br>NEIEASRAKLNKIEAIEAEVQKVIFEKENLKTQEEKEHHLKQKELKLE<br>KDEYQMMMESLEKQKEALRQEREMFERDWEVLDEKRVLEADLKQL<br>CAEREKLEKWRHTEERLKHEVLEARASMHRELDLRLKKTFFEKIIAQE<br>RAGARADIDSERADLSREFELFKHGLEMTGQRKQDDAEKFFQEKKNF<br>EMWREVELSRIKSSIESNDLEFRRLMQKQQLLRDKEQFSDQRRKIEAD<br>RQEIQKDIDTLLRLSKNLKDQREEFAKERENFLSAAEQCKTCHNCGVPI                                                                                                                                                                                                                                                                                                                                                                                                                                                                                             |

|        |                         |                   |                                                                                                                                                                                                                                                                                                                                                                                                                                                                                                                                                                                                                                                                                                                                                                                                                                                                                                                                                                                                                                                                                                                                                                                                                                                                                                                      |
|--------|-------------------------|-------------------|----------------------------------------------------------------------------------------------------------------------------------------------------------------------------------------------------------------------------------------------------------------------------------------------------------------------------------------------------------------------------------------------------------------------------------------------------------------------------------------------------------------------------------------------------------------------------------------------------------------------------------------------------------------------------------------------------------------------------------------------------------------------------------------------------------------------------------------------------------------------------------------------------------------------------------------------------------------------------------------------------------------------------------------------------------------------------------------------------------------------------------------------------------------------------------------------------------------------------------------------------------------------------------------------------------------------|
|        |                         |                   | <p>NNVDQLVLQPLGATVDSEEVLLPSLTDGFLEEHAKGGSPDLSHGPPVA<br/> GSANSGSQMKRWFQRCASLFKISPRNNVHSPTEHDNETSFGERLDKV<br/> AFEDADYEPAPSASFENQMAHVDSGDVVTGELVRVDNAEDDAEASL<br/> DGANSSMDIVKIDSDDGSQKTAAVTDGMNNEVEGSSMHAEKDLKPE<br/> PSKQGGQRHQPNRRAKSAIRRTRSVKAVVEDAKAILGEVYETMVDEKQ<br/> NDNAKDSQNIPNENPEASVKADRAVTGKRKKRRLREVEPEDSEPLSES<br/> VSIGGRPQRQTSSRPTTPGEEKRYNLRRSTVASSAATSHGTSHQTGAT<br/> NVGKLELLHESNIVEGGQPVSNNKGGEGGQQESNIEQASNRTECGQPVS<br/> YKVEGSRPVSNEVEGQQENNIFEDGQPENNITEGGLGSRNSFHDP<br/> QPSRWFENSEYVLPKDAVDSAMEVQSEKIVQVTKYKTQEVHDDSIVK<br/> SVKFIEQIQDRKEVDGNGITVKSTEFIEQIAEDGDEVDGDIDILNNSAE<br/> FSEQVAEDGDEVDGDAATATPSDWSEDEDEYSKKHNASIGKKLWTF<br/> FTT</p>                                                                                                                                                                                                                                                                                                                                                                                                                                                                                                                                                                                                                                            |
| Dct1ll | Dendrobium<br>catenatum | KEGG<br>110108144 | <p>MGLLLIEKKEWSSQIEELKQAFIESQETLKRKRDAHIISVSELEKRKENLK<br/> KTLGVEKQCVDLEKALHEMRAENAETKFISGKRLADAHAEASVEEKK<br/> MEIEAKMHSADARLAEANRKNSEIDRKSENLAAREYKLRLESSLNIGR<br/> KTIETDVSKQREHLREWEDMQEKQRMILLNEQRLLNEREERANDMD<br/> IILKKKEAEIEDARKNIDAASSILRSQEDGLKARLRTLIVKEQDTEIKSSTLE<br/> KKEEDLMAIEERLSVRESEIEQKLLDEQNATLDAKIQDFELEMVKKRQSF<br/> DKEVKNHVDLLDKEKRQVKCKEEQIVKRDETLDKTKDKLSKEEVLDTK<br/> SRTLKKWEDSLKTDEKKLQEEEREQLIKDANELEASRAKLNHNEKAAIEAE<br/> GQKVVLEKENLRLTQLERERHLKMQAELKLEKEEYRMMMESLEKEKD<br/> VLGQEKEMFERDWEVLDVRRVALEAEIKQLSAEREKFEKWQHTEERL<br/> KNEGLLAITDSQRELEDLRLKKEAFESMMAQERADVHAEVDRERADM<br/> SREFELLKHKLEMNMQRIQDDVEKELKEKENMFERWREVELSRIKSST<br/> ESNDFRGKRLEMELNQLQREKAAFSDQRGKLEADRQEIQNDIDTLRL<br/> SKNLKDQREEFAKEKEMFLSAVEQCKTCHNCGVPIYNIDLLDLQPLKST<br/> EGSEEIILPSLADGFLEEHMKGSTVISPRVLAVGSSNSGSHMTRWLQR<br/> CASLFKISPKMNVHLPDSDQIGTSFGERLNRAALEDADYEPAPSGNHSF<br/> GNQVHFDCGDRMSGEPDRVHKTGDEVESFGVADSSNDIVRIDTDKA<br/> KATRKTVVVIDDENDEMGGSSIHVENDSQDTLTKVQQRHKPNRRAKP<br/> NLIRRTRSVKAVVEDAKAIIGESSELKIDEQQNDDAKGSQNIPDESQGA<br/> SVQADQAQTGTRQKRPSRELEPEGSEAHSESFVGGCRKRRQTSSLLP<br/> APGNKRYNFRSTVASTAAASQAKSHQKEAANAGSFKALPENNIRDG<br/> GHGGERISCHDTPSGALESSAHLQKSAFPTVLEVNSNERVQHESHN<br/> LLHDGGIVEYALFSEQTAENREEVDGGAASAHTENTASYGGSESDDDE<br/> DSEKQNTSIGKKLWHFLT</p> |
| Dct2   | Dendrobium<br>catenatum | KEGG<br>110098035 | <p>MATPPPATLPESFGVTRLAGARASPSTAKGGSSLREEAIWKRLREAGF<br/> DEETVRRDKAALITYVTRLEAEIYDYQCNMGLILLEKKDLESKYNEIKAS<br/> AESAEIYKRDKAANLSALGEARKREENLKQTLGIEKECLANIEKTLHETL<br/> VESAETKVACERKLVEAQSMMETAQRMFDEAKSKTHEAEASQAEAR<br/> RRQNTALRTLQDVEAREDELRRRIASFHAECEAKEKEVSLQRQSMNDS<br/> QKILHQEQERLMEGQSLNQRREEHLHVRLKELSRAEKELAEAKLFEND<br/> SSTFGEEKANLELNVAALANREEALIKREALIDKDKDRELLILQEKISNKEFD<br/> EIQRLKAEQYSFERKTFFEAEMEQRKSLEGEMEMNRNACSVFAE<br/> LKQREQQILKMENSVRTDLHAISEKQEDVMKKLNLLLEEKESLLLTERTL<br/> ESKMQDLQKEKKEIDEMREELHKEKISFEDVKMQILRAEEKLAITANER<br/> NELLVIERKLKEEIDSFRAQMLELEVQAGLKEKEKFEIEWDLIDEKTEV<br/> LRKEAERIAERRAVDIHLRNELDLNAEKESLREQLKRNAESLSIERDDF<br/> MRKMEREHSDWFIKFHKEKEDFLNDVKIQRKELENSICRRREDVENYL<br/> KEKEEAFEQEKSKELQSIVSQKEEIAKQLRHAASELKRLDMERMEIAHD</p>                                                                                                                                                                                                                                                                                                                                                                                                                                                                                                                       |

|      |                           |                                                               |                                                                                                                                                                                                                                                                                                                                                                                                                                                                                                                                                                                                                                                                                                                                                                                                                                                                                                      |
|------|---------------------------|---------------------------------------------------------------|------------------------------------------------------------------------------------------------------------------------------------------------------------------------------------------------------------------------------------------------------------------------------------------------------------------------------------------------------------------------------------------------------------------------------------------------------------------------------------------------------------------------------------------------------------------------------------------------------------------------------------------------------------------------------------------------------------------------------------------------------------------------------------------------------------------------------------------------------------------------------------------------------|
|      |                           |                                                               | REQRQKEWSEINHFIELNVQREKLQKQRELLHADREEIDKQIQHLLKL<br>EHSNIELESRTLYDSNADNPKVNIGNLSSRKGLYQKEAANNSHNPDCQ<br>KISLTDSLKNMSSMNASDNASPLSAPMTWFRKCAEVIFKLSPERVTD<br>TFQGGVSGSSTSLQHYHENIEDVQNLEFKSNEEEINHPMEDGVIAISE<br>EKHKSNIKSNMLPLRRKRPGHAASNGYNSKSYSRKHPKLRQNSVA<br>EMEAVLDCPDVNNGMLEDQTAEALLEAAVLSEVIRLADANGSEMKE<br>DVECDQQSCEDIVEEEDQPSLGAKIKKFLIT                                                                                                                                                                                                                                                                                                                                                                                                                                                                                                                                                    |
| Dob1 | Dendrolycopodium_obscurum | onekp:XXNF_scaffold_2008050                                   | SPEDNEFLVAAADRSRSEQEIWKQFKDAGALDEESLEKKDRAALLAHIS<br>TLESELYDYQYQMGLLLLESKSWGPKFEKMGKAIADAENLKREQAAH<br>MIAITEAERREDALKALSTEKQCVADLEKALKEMQAELA EVKEDAAR<br>QLAQAKNLLVGMEEKSVKADSR LHAGEAILAQASRKQADAERKLQEV<br>QAREDALRRQQQEFTVNCEARKHELDHDEENLKEWEKRLQDGGQNR<br>LDGENIINKREEFVNQKDLDLKKLDEDLKVARKQLEQSRLQLQQDEIDL<br>KARITATSLREESAVKKEVALDKKEQEVLLLQERVATRECIFEQHERHVQ<br>ETEIFNLKEKERLEALESSLSREDSFSEKKQELDNLMKALEEARKEEVRT<br>KSELQNTMDELERLRESMKAEEQELGKTRQSCIVLEVEMNQKEEKLLK<br>KEQQMDKKA EKLEREKDLDGKMKGVKERERLLKNEEKRA DAERRLIE<br>QEKEGLMKEKEELEKWRLEILAENKKIEDEKEKLSIEQEREDLLHVKTQ<br>LKGEIDELRAQRQEIILAAEELKKEKERFEKEWELLDEKNELVRKERDSLE<br>QESRRISKWVQDEEERIKKEKRD MHERNHREYEILRAEKEALLNSSEAD<br>KRNL FEMVERERDDLARDIELHRVELERGV EKRKTEVEKEAEELKSKLN<br>EEIHKAEQEEIRTSREAIQRESEEISKQRSKFEKEKQEMAKQREEVEEKWL<br>EIKKDIEELQLQREKLKEQRESLRNERAEMLIEAERMKKLRDELKEADESI<br>QISEQQPSRKYATDNEV |
| Dob2 | Dendrolycopodium_obscurum | onekp:XXNF_scaffold_2071271                                   | KQLEGSGLDVL SLEKKDRSALLSHISSLQKELYDYQYQMGLLLVECKN<br>WGPRYDKLVAVSETENWQKEETMHAKALAEAKKREEVLKQSLEIEK<br>QCIVDLEKALKEMQLEVAEGKEAAGKQLS QARILVNEAEKSLMAESK<br>LHSAEALHAEASRKLAEATERKLQEIEAREDALRREQHKLNAEYEARKGD<br>LDTDEENLQNWEKRLQEQDRLRQGEKLLNDREEVYVEEKEEGLKQLEK<br>AIKDERVLEKEHSRLRQEEADLNAQMAAISLREKTTIEREVS LDKKEQE<br>LLIFQERLVNRRERVTEKHEQEVKDKEASLAEREKLECARIGLQQMEDSI<br>NEEKQKLAAMTKVLDGKNKDLSTREEELQEKVAELEKQQSILIQQDL<br>DKTKHSLATREADINKLYESVHKEKEQCQEERDKLKDRERDLDEMLKQI<br>VSKEQDFANEKRQFMIEKEELKQQVSSLYQRDEVEERKKELKLEKEQL<br>QEEKRQLEVIKQEREDILKVQVQLKEEIDSLRGCKHDVQHKEEELKVEK<br>ERFEKQWEFLDEKKEQLRKDEDNIKQERKKFEKWIQDEEARLKEEKREL<br>WQQIQKESELLNSEKRAFILSMEMEKADLFSKIQKEREELARDIELRGAE<br>LERCLEKRRMEVERKSEELKLEETLRKEKLDLQLLKENAQKEMEFVLK<br>EKQKLEKEKEEMLNQKEKLEPERCEIKGDIMELKLQREKLMEQRESLHK<br>EKQELMQEAERLKRRLRQEVKHVDDSSLNSEQ                                               |
| Egi1 | Equisetum_giganteum       | (Vanneste et al., 2015) cds.Locus_9256_Transcript_1_1_m.19285 | MFTPQRRGWPGWALPPSAERKDKGRMLSPELRFSGGSDRDASPAKG<br>LIEAPPARSLQDNHVLARPELETWRRFREAGTLDEVSIKKDRAALVS<br>FISNLETELYDYQYNMGLLLMERKEWDAKAEKLA AVQEAENLKREL<br>AAHLIVITEAEKRQEDLKKALTVEKQCVFDLEKALKEMRAEAAEIKASAE<br>SKLTEAREMLSGIEEKSM LAESKLHAAEALQAEASRKHGDAERKLQEVE<br>GREDAIRRRERHLFKAECEAREIEFEREKQNLCKWEKKLQEGQERQLEG<br>QGLLNQREEYANKKDET LKQLEKSLRDAKKQLEREQEA VQQLKADLES<br>RVAAIALREQNVIKQEISIDKKEQGILLLQEKIASRERAVEQHENHLQSL<br>SFGKERDRLEALERTLKLKEEAMPQQKELMELQRS LDQQKVELENS<br>KLQCESALAE LERQRSLSFQEEEELNQRKAAALERDAELGRKEDKLLKKE<br>QQLEKKA EKLEKEKEVD AKMKAQKERERSLKAEEKQLEAGRRTAAEE                                                                                                                                                                                                                                                                                                     |

|      |                     |                                                                  |                                                                                                                                                                                                                                                                                                                                                                                                                                                                                                                                                                                                                                                                                                                                                                                                                                                                                                                                                                                                                                                                                                                                                                                                                                                                                                                                                                                                   |
|------|---------------------|------------------------------------------------------------------|---------------------------------------------------------------------------------------------------------------------------------------------------------------------------------------------------------------------------------------------------------------------------------------------------------------------------------------------------------------------------------------------------------------------------------------------------------------------------------------------------------------------------------------------------------------------------------------------------------------------------------------------------------------------------------------------------------------------------------------------------------------------------------------------------------------------------------------------------------------------------------------------------------------------------------------------------------------------------------------------------------------------------------------------------------------------------------------------------------------------------------------------------------------------------------------------------------------------------------------------------------------------------------------------------------------------------------------------------------------------------------------------------|
|      |                     |                                                                  | <p> RGNLQLLKEEVENLRNNLEAEKKQIEEEREKLVIEQEREDVLTQQLL<br/> EEIDSCRAATKAVHMQAEELKKEKEKFEKEWEILDEKRQFSTKEFEQVE<br/> EKKRIEKWLQDAQERLKQEKWMLHEQIEKDTEALREKEDFVRSME<br/> QERGEWFSKVENLREDLIRDVEVRRKDLEKSIEKRKADIEKQIKEREARL<br/> KADAEREKESIRVLKIAAQKELKEAQQQRKNVEKERQDIVKHREESEKD<br/> WMEIKKDIEELEHQREKLKEQREGLRKEEETVREFEVLKLRDEM KIA<br/> EDSMKSDQVSHRNEVEVSSPRILLPNEKAYILPTVKNKSTMDDTPGNFL<br/> GSPGRFSWLQKCASVFLTPPEKNARMAGDSKGATEIGVNSVSPGANI<br/> GGESINEVVSVEEEMQISASEHSKSGSFTLSEYVDSEMKEEPSRRQKKA<br/> KAYARRTRSIRAVVEDARVFLKLPGEAKEGSEEEGRMNSVQEEDTTT<br/> LEEERDSKLVKQSRKRYRAQAAMTSEHEVDDAETGSEVTIGGSRRKRR<br/> QREVNIGVEPGTRRRYLRHSTVATKVVPPQGGNGKEKPTISENSCHGT<br/> SDGPRKEAIETQQEISPEHNHLDGLNEIQNGTDVSLLCVQLDSVEEAAG<br/> KEVAAVNSRSSTEVENVNEVIETSKKHAEKVFFVENAEGEALRGE GEGV<br/> ADSADEEEEEEEADNDKGILEEGHSEEEEEEGEGEEEEEEKEEMDEG<br/> GEEEDDEQAPATLREKLWDFLTT </p>                                                                                                                                                                                                                                                                                                                                                                                                                                                                                                                      |
| Egi2 | Equisetum giganteum | (Vanneste et al., 2015) cds.Locus_12 462_Transcript_1_1_m.24 822 | <p> MFTPQRRGWPGWALSPPHTEQKDKGKIMSPGGVGTDLVVSPA KSLV<br/> ELPLTRTMEENGQILARPEPEIFRRFREGGPFDELLIEKKDRAALAAHIAT<br/> LDAELYDYQYNMGLLIMERKEWD AKLEKMRAAVLETEENLRRELSVH<br/> HAVVTEAEKREEVLKKSVAVEKQCVLDLEKALRELSEAAEVKVSAN KI<br/> CQAREMITSTEEKALLAESKFHSAEAFEAESRKQADAERKLQVEVARE<br/> DTLRRERQSLKAEYEARQMELEREKRNLCWEKKLQGGQERLLEGQR<br/> SLNQREEYANQMDGMLKEFEKNMQEAKKQIEKEQGALQQLEADISS<br/> RMAAVVSREENVIKQEICIGKKEQELLLQEKIASRERAAEQHEKHVESL<br/> ESLAVKERDRLEALEKTLKLEEAMPQQKELMELQRSLDQQKTELENS<br/> KLECESAIAELERQRNLFTVEEEEINKRMSAAAERDAEFDRKEQKLLKKE<br/> QQQEKKA EKLEKEKDLDAKIKAQKERERALKAEKQIQVEREKFAGER<br/> EGLELAKEEIEKLRNDLEAEKKQIQEEREKLVIEKEREVLTQLLLKEEI<br/> DSCRAATKAIHVQADELKKKEMFEKEWEILDEKREVVKKEAEQVEQE<br/> KKRLEKWLQDEQQRLKQEKRLREQFERDTEELRVEKEAFVDSMEQER<br/> SQWFAKVESLKEELLADVEVKRKELENTIKKQKEDIEREIKDREFRLEVA<br/> TQREKEGISELRMAAEKELEEAQQERWKVEKEREDIKHHREESEKEWM<br/> AIKKDIEELEVQREKLKEQREALRREREIINEFERLKKLKGEEKSAAEEDS<br/> SELDEKSVERNNNNEIQASSPIRGAAAPLSSERRRILGIFGAGRSVVD ET<br/> PGKSSGSPGRFSWLQKCASVLFNTPEKRAGMEGSRNPTEAADSPASV<br/> NIVVEFDNPSQTQNDLNEGCNNEEGNLIEEEEEVGRSSSQHSKSSDSFT<br/> LGEFVESVSREQPGKKRKKVAEGGVKRTPSIYVAEDKKDNIMMKPS<br/> LEGEGRGEIRNENGEDRRMDSTFEETVKGQDSNNPLAPPASEEERDR<br/> SKAMITKQGRKRNRRLSTSKQEEGEGVETSEVTTGGKRKRQRREVS<br/> HITIDLKESPAAKRYNLRRTTVATKPVTVQGYVANGKEKLMADNTQSS<br/> DDEVNRNDGVETLQENSLPESDYQDGINADVTTPPCN </p> |
| Egi3 | Equisetum giganteum | (Vanneste et al., 2015) cds.Locus_15 311_Transcript_1_1_m.29 04  | <p> MIKNSPVYGWDRSEPIQPSFKSSNLLLHLCKPLCRLF KGDVVEIPVLNT<br/> MLASDRRGSQPSWALLMPQTLLAQEEEEENPPLFRKEPPIEMEEPTSDN<br/> NPLLRSRLRGQTTAMDPPPFQVFRPPSDRITPLHSDRTLLLAQITKLEAEL<br/> YDHYQYNMGLLIMERKEWDIKSEQLREVVVQAQENLRKHIAANNAVK<br/> LEFRKREESLKKAVMIEKQCVGDLEKALREMRSEAADLKVSAESKFIEAK<br/> DMVTNIELKLHLADTKLQTAEVLQAEASRKHEDMERKLEVEAQEAVF<br/> RREKILLKEEQEAHESELCHLKYKLQETERKLQEDQDRLLKGLNMQ<br/> RDDLASQKENALKRTDFFLEDRKKGLEKERAALKQLETDANSRMVAVE<br/> AQEQKIIDKEIYLGKKQQQLLSQERVVSKERAIQKHENHVKMMETLEE<br/> KEKVRLEALGKAIELLEEALHEQKRELKTFERSLDQQKSELDSRKA EYQT </p>                                                                                                                                                                                                                                                                                                                                                                                                                                                                                                                                                                                                                                                                                                                                                                                                                            |



|      |                    |                                 |                                                                                                                                                                                                                                                                                                                                                                                                                                                                                                                                                                                                                                                                                                                                                                                                                                                                                                                                                                                                                                                                                                                                                                                                                                 |
|------|--------------------|---------------------------------|---------------------------------------------------------------------------------------------------------------------------------------------------------------------------------------------------------------------------------------------------------------------------------------------------------------------------------------------------------------------------------------------------------------------------------------------------------------------------------------------------------------------------------------------------------------------------------------------------------------------------------------------------------------------------------------------------------------------------------------------------------------------------------------------------------------------------------------------------------------------------------------------------------------------------------------------------------------------------------------------------------------------------------------------------------------------------------------------------------------------------------------------------------------------------------------------------------------------------------|
|      |                    |                                 | LKAEAEKCHRLLSFENGQLEDLVQSQGEKEAAMEQREEALCKKEQEVDEEGERLKQKETEVDKTEQVKQRSEALKKEFGDIMSSERRVMAGEMEARLKSNGKEIESMRAILEAQSRIVEEREGFELRYPESEELRTLRAQLKEGLDGFVALVNLTDMEAEELLQKRREEAEKERNLLDKRIGSIRKEAERVEQEKRMLLWVIQDEERRVEQEKGLSRNQVRREMESLRLEKEFFISIMEQDKLEWITKAQKQKLDLATEVDMQSMVVERNMGKWKEDIEKQLDEREANLKEILAQTEHLSSIRASAENEQKLLHSERIRLRNGKQELLKYCREMEKERV EIKKDIEELQDQSGKLQEQREGLKDRGKLMDEINKLTKMKGKEGSPN NCPSLAMISIKPPKSAEMPEHMSWLKRCASLVFTSPESKQGRGRINGS TEIDIVLKDLMPS                                                                                                                                                                                                                                                                                                                                                                                                                                                                                                                                                                                                                                                                                                                                                              |
| Egr1 | Eucalyptus grandis | Phytozome 12<br>Eucgr.J01462 .1 | MFTPQRKAWSGWTLSPRGQAPRSGSGSPDPSADGKGSIVPAEPVTPPLSGNGMVVDGGGDPAGRVSLLEKELFEYQYNMGLLLIEKKEWA SKNEELRRALEEIKDALKREQAHLIAMS DVKREDDLKALGVEKQCVSDLEKTLREMRAEYAEIKFTADSKLAEANALAASIEEKSLEVEAKSHAAD AKLAEISRKNSEIERKMRDVEDAREASFRERLSFMTEREVHETTLKSKQREDLQEWERKLC DGEERLGDRFVNLNQR EEMANEKDKIYKQKEKDL EEAQKTIDEANLTL SRKEEDISSRLANLKLKEKEFETIRKNLEIKEKQLVATEE KLNARERDEIQKLLDEHARVLDVKKNEFELELEQSKKFD EDLERKGFDI QKKEAEIKHKEDKLVKREQAVEKTEKLEKEDDLQLKLDLKEKEKFLKSEEKNLETQKKSVAVEKEELLSLRAALEKIRAENEEQLVKIRMEK DQLNV SEEERSDFVRLQSELKEEREKCR LQKELLLKEAEDLKQKQEA FEKEWDEL DEKRAQIEKERMDAERQKKEFKLHSEEEKLRDRMEKDDYIKRELEDELAKGSFEARMEHETS VLAEKVQSERSQMLRDFELQKKELETNMQN KWDEMENNLHGRMKSFEEKERELNNINYLREVARREMEEMKQERAE LQKERE GFAANKKHLEDEQVEIRKDIEQLVALSKKLDQREKFIEERDR FIFAKQOSSCNTCGELTREFLLSDLSISEIENAELSRSKLAEAYAKEEA NTTFNPSGRPNTDTSPNLVGSSTPLTVGTVSWLRKCTTKIFSLSPGKKTDSHPVQDLTQEGRVHGDPVNVEEPSKANTENDAEVSVFAVASVDFVEGYQREDEGGQDMSYDSNVNSKRQEI AEDSQPSDLNNGVVRQPRKRGRPRVNRTRTMKEVVKDANTFLGKGFGSNETEQENGNVEDSAPT NADS RDEASLASKGRPRNVRKRGRDNTTVSEHDADDT EGHSDSVSKGQRGKRRQRNTAAVQALGEQRYNLRRPKGGVKT TASGMSNDLNKDNKKEADREGAEEIHYAKAAPALSVTVAENGRSAHLMRCGLADTQDGDANGTKEIVEDLALSEEVNGTPDKGDKHDNRSESLGVNAVTRDEDGDDDECEDEHPGEVSGKKLWNFLT |
| Egr2 | Eucalyptus grandis | Phytozome 12<br>Eucgr.I00661 .1 | MAS PQSGRLAPASSGRFGSLTAGTRAPQSPLGDEAVWRRLRDAGFDESVKRRDKAALIAYIAKLEAEIFDHQHMMGLLILEQKEITSKYEQAKASAEAAELKCKRNQAAHLSGLAEARKREETLRKSLGVEKECIASLEKALHEMRAESAETKVA AENKLSEAHLMVENAQKKFTEAEAKLQAAESLQAEANRYHRLAERKLQEVGEREDDLRRRIQSFKSECDAKENEIFLERQSLGERQRILEQGEKRLLDGQASLNQREGYIFTRSQELDQLEKELEASRANIEKQRGALNDEKSDLELRVASLVDKEQD LLRKEVSLNQEKEQLLVLQEKLASKESA DIQKVIANQEA VLRSRKA EFSEMEMKRKLVEDEIETKQRAWELREMDITHQEDHLKEREHDLGIQIRSLTEKEKDVKERWDNV DAREKKLASAEAD FELRKDMLQKEKEEINKLKQDLQKSLDLEDK KQVDSAKDKLEV MKTETSSELSVLEIKLKEELDRVRAEKLEREELKKAERIAEERVA VAKFLKDERDSLKIEKDAMRNQYKHDVESLRLEREEFMNRMVQERSEWFSKIQQERTDVLLIEIVQKRELEDCIEKRREELESSLRDKEKAFEEKKNELQRIGSLKEAAEKELDRVALEMKRLESERMEINVDRERRDREWAELQNSIEELKLRQKQLERQRELLHVDREEICTHIEQMKNKLEDLKLALDRKAVETQQSVSESRLMKISGNRHPKQLTAVNNNNMDLDDR VYEVGHVNGPNSPTLQKAG                                                                                                                                                                                                                                                                                                                                                                                                             |

|       |                           |                                       |                                                                                                                                                                                                                                                                                                                                                                                                                                                                                                                                                                                                                                                                                                                                                                                                                                                                                                                                                                                                                                                                                                                                                                                                                                                                                                                                            |
|-------|---------------------------|---------------------------------------|--------------------------------------------------------------------------------------------------------------------------------------------------------------------------------------------------------------------------------------------------------------------------------------------------------------------------------------------------------------------------------------------------------------------------------------------------------------------------------------------------------------------------------------------------------------------------------------------------------------------------------------------------------------------------------------------------------------------------------------------------------------------------------------------------------------------------------------------------------------------------------------------------------------------------------------------------------------------------------------------------------------------------------------------------------------------------------------------------------------------------------------------------------------------------------------------------------------------------------------------------------------------------------------------------------------------------------------------|
|       |                           |                                       | HSSSPSSAPLSWIRRYSDLLFRSSEKSHLASEKEPSISKNDEQATPMVRQ<br>LDLSLRYDVQKHEQKKRLEGIRGMSRPEKHVGGEEKTIFEVPTGGEDAN<br>EESKKKETASHKPESIAEKGPQTRRKRRVKELLPRDSVNIQPEERKSKK<br>NKGMMQVDGGADLSDLANTNHVNAGQPCIADVEDASLSSKETRFVAE<br>ETTVLVVDEVVNISVSSEKESLKQRVNEDNNDHLLLEGGSADAHEVPGG<br>NGVLTHETASVVLVEDVRLVGDIGQGHDVSAKADQIPRDQGLSNLDT<br>HGEDG                                                                                                                                                                                                                                                                                                                                                                                                                                                                                                                                                                                                                                                                                                                                                                                                                                                                                                                                                                                                           |
| Egr3  | <i>Eucalyptus grandis</i> | Phytozome<br>12<br>Eucgr.G0236<br>1.1 | MFTPQRKAYPAISLTPRTEAARTGGGGGKGAFAFLEGGPPPPPPVA<br>SLDGNVMGNVGLGLEDEDWRRFREAGLLDEAEMDRKDRQAIAEK<br>VTKLENELLDYQYNMGLLLIEKKEWNLKFEELGQALSEVQQLLKREQSA<br>HLIAMSEAEKKEENLRRALALERQCVADEKALHEIHNDQHMKLDSE<br>KKLAQASALTTGIEDRSLEVKEKLHDVDAKLAEVSRKSSQLDLKMQEVE<br>ARESVLQRERLSLKTEQEAHKASFYKQREDLREWQKLRERREKLCEDR<br>RILNEKEEKANEIDQHLMQKERDIEEAYRNISSKSMLEPEKEKHINQSLA<br>DLAAKEKEVLSKESIIRSKEEKLNALENKLNLRSEVEIQKLVDEQKALLDG<br>KMLSFETELEERRKSLDKELKIKKEELERKEVEINHKEQKLGKRESALHAK<br>TERFKEKDKELESMLKILKEKEKSMKAEKKLEVEKKQLSAEKEALENLK<br>DEIEKIKADIAGKELEIKEESENRLNDEERSEHLRLQAEKMEIENCRSQ<br>QESLLRESEELKEEREKFEKEWEALDEKRAAIIENRKFLEQKEKSEKWQ<br>SAEQERLKRKHEMEEHMQGELEAIKLEKELFATKMKHEESDLSEKVQ<br>NERSQMLREFELMKVDLETSLQKRQEETEKKAVLLEKQFELEKEKELKSI<br>NELKESALRELDEIRSEKHRIEKDKQALVLNKKQLDENQIKVREDIDQLF<br>LLSHKLDQREELIKERSRFLSFVEKFKNCEKCGDEAREFTLSDLQLPQM<br>GDKEILPPPRLVEELSNKPCSRMSPFGRSPSEKSPDELGLVHSDSGSHM<br>SWLRKCTSKIFKLSPSKKIKDSDASPQSHKNFNFEENDGRLSMARNEET<br>NNGHGTNEDEAEPSLGKVEVATFNQRFKSVDIVKEVDDGHVSSLDDS<br>NYLHDQMPDLPEDSQHSEVKKSRKGGKRNNGIHRTRSVKAVVEDAK<br>AFLGDVSKDTLPNDTADQADLVHKGKAVSNVPRKRQHAESSQIT<br>ESEQDGGDSEGPSNSVSVSGRKKRRQTVHVPVAVQTPGQKRYNLRQK<br>TVGNVAAEEASADLNQDGKVEAASGGGEEAINGEDNNVPSHNSDEH<br>HNQMHLTQATSLRTMELSQQKVVRFVVNVVDNSVNLAKPDENGET<br>VGTGELSGEDENGSALEAEDDYDDELEHPGGASVGGKIWTFFTT |
| Egu1l | <i>Elaeis guineensis</i>  | KEGG<br>egu:1050470<br>97             | MFTRQKKGWSLLPRAAERSSGSVPLNPRDGSMLLNRRNGNGKGEIAV<br>AARPPPPQASPGDDKGAFLARECGEEVWRSFREAGFLDESVLQRR<br>NCEAFAQRISDLEKELYDYQYNMGLLLIEKNEWASKYEEIRKGLAEAE<br>TLKRERAHWHIARSELERQDENMRKALGVEKQSIIDLKALHEESGENAE<br>AKFMFDKKLVEIHALEASIGDGYLEIKGLHSAVPRLAESQKNPETGRK<br>LEDVEAYEHEIQKESTAFTTGKRKHEELTQQREELRSWEQKLQDRQKK<br>LDEEEKFLDERENEANERDIIQDEEELEARKEMEVANNLSKNKEKDI<br>NAGLEALDAKEKLEIQKLLDDHNMILDSKKQEFEWEMEKRNIFDQEV<br>KDRLDAVEKKSTEINIREVQIFNKEQDLEIEIQKLDKKEKXFNEILDALKE<br>REDSIRKDENKLQDEKEKLARDTQKLLSSQTELENSRNAMEAERLQITIR<br>EKENLKVAKEERAHHLQLQSKLEQEIGDYRIMKESHKETEELRKERDR<br>LEKVSEVLDNRKLALETQKLNVEKERFEKWQCVEEGKLLKERLESTIH<br>IQRVLEELRLIKETFGKSLVHQLDPVELFKKHADIKDADALKIHKLNPD<br>QDWLEGDKELYVCRNKREAEQLDIQKDILQICKNLKNQQEVVIKEK<br>ERIFALAEQLKCKKNCGFKIDDADIHQIPNGTEGSENILLSTIANDYLK<br>EPQEGENTDVSPQGTSPPHVTSRGCELLQCSSLFSHRKVVNQSSDG<br>HIKKSCLFDAHLDAEALDDEVKQYVPSFSVANAAMDRCRARSVGGV<br>SYDGESKGLGKANDVAKPSFGVADISTEMMKFQSANGATEMEGVPN<br>FPLIHEQNGREGSFLPETNSQLQASKQRQHQSSSSAGSIIKRTNSVK                                                                                                                                                                                                                                                                                                                          |

|        |                      |                           |                                                                                                                                                                                                                                                                                                                                                                                                                                                                                                                                                                                                                                                                                                                                                                                                                                                                                                                                                                                                                                                                                                                                                                                                                                                                                                                                                                                               |
|--------|----------------------|---------------------------|-----------------------------------------------------------------------------------------------------------------------------------------------------------------------------------------------------------------------------------------------------------------------------------------------------------------------------------------------------------------------------------------------------------------------------------------------------------------------------------------------------------------------------------------------------------------------------------------------------------------------------------------------------------------------------------------------------------------------------------------------------------------------------------------------------------------------------------------------------------------------------------------------------------------------------------------------------------------------------------------------------------------------------------------------------------------------------------------------------------------------------------------------------------------------------------------------------------------------------------------------------------------------------------------------------------------------------------------------------------------------------------------------|
|        |                      |                           | AVIEDAKAITGVNSEEKHKPSNGEDGYSQYVHEESRDDSVDHDDQVA<br>SNAEQNTHFSDASGLTNSELDAGDGEVHFESVSCRAHRKRRQTTPSGT<br>VTPGVKRYNLRSTIMATMTTAQGSSNQSKGQKXSLWQPH                                                                                                                                                                                                                                                                                                                                                                                                                                                                                                                                                                                                                                                                                                                                                                                                                                                                                                                                                                                                                                                                                                                                                                                                                                                |
| Egu1II | Elaeis<br>guineensis | KEGG<br>egu:1050563<br>31 | MFTPQKKGWAGWSLSPRVGDGPDGGSAPVNARSAGGLSLGKGGK<br>GKSVVEALPPPQASLGENGDAAGGAGDVEVWRRRFREAGLLDES<br>VQKKEKEALVQRISSELETELHEYQYNMGLLLIEKKEWTCKYEE<br>IRQGLAEAEEILKREQAHTIAVSEYEKQKENLQKALGVEKQC<br>VADLEKALREMRGEIAEAKYTSDDKLAEAHALEANLEEKYLE<br>IEGKLSADAKLAEASRKSSEVDRLDDVEARERKLQKEYLS<br>LNTERTKYKDLDEQREHLREWEKNLQESQKRLLGQRSINDRE<br>ERANETDRLLKKKEELEEARKMIEVTKNSLKEKEDDISNRQKAL<br>ISKEKESIKIENVEKKEKELLAIEEKLNAEKVEMQKLLDDHTE<br>ALNSKKQEFELDLERRRKFDEEIKGLDAVDKKKIEIDRKEEQVT<br>KREREVENKMQSLKQKEKDFDTKSKALKKWEESIKIDQKKLEEK<br>QQLDRELQDLCKSRNELENLKVVEAKQMIKEEELKELTKEEREQ<br>HLLLQTKLKQEIEDCRIIKESLLKEREDLRELRENFKEWDVLD<br>EKKVELEAEVKKVNDERERFEKWRFFSEERLNNEVLEAKAGIQ<br>RELEELRLKKTTFDSTMELEKSNASEELKRGHADIARELELR<br>KHELEMDMQKKHEDMEKQLQEKENQFNWRDRELNQINSLKLN<br>NESKIQKLVQEQDLEREKEEFSEHRKKLESQLEIQNDIETLR<br>MLSRNLKDQREQFTKEKERFLAFAEQYKVKCNCGVTMSDLELL<br>QLGSDDAGDVQLPSLALAEHLKGKNAEISPTGTGLRSVSGGR<br>MSWLQKCSRLFNFSFGKKEEKLSECQAESLSFGARLDGEASEG<br>EANYEPGPSYVVGNDTIDAQRVQSDSGVRENEESERLVEAGD<br>GPEPSFGIADNSTDIQVESEIIPIDERNEREESLPPENEFQPE<br>PLKQRRRLPNRKGRPKATRRTSVKAVVEDAKAILGETSEEKNDG<br>PPNGVTRDSLNIQEE SQGDSVHADAVATSSRQKRRLAQTS<br>GMTAGELEQMTVKRVQRAFHLVGVERGVKSQLEHRLLEARN<br>ATISGALQSQTMPDQTKHKTGSHQOSTENEVLKGGSDGEGT<br>SKRVPAAPSSGIVGENKKTSHMLQRTTVGSAEEVHENSQKLAL<br>VEETHANESDCDIIVKSMDCSEQSGEDGIVVDGAAGASEP<br>ATPDGGCGSEDDYDEDEEDSEKHDASIGKKLWTFFFT |
| Egu2I  | Elaeis<br>guineensis | KEGG<br>egu:1050612<br>08 | MASRRPRSSPLALGAARSLAPMVAGASPPACGAGSLGDEAIW<br>KRLREAGFDEESVKKRDKAALIAYSKLESEIYDQHMGLLIL<br>ERKEWTSKYEQVKASAESAIVYQREKAAHLSAIAEARKREES<br>LKKALGIEKECVTNIKALHDMRAESAETKLAYENKLAEARQ<br>MMEVAQQKFDEAKGKLLAAESLHAEASRSHNTALRTLQD<br>VEAREDELRRDLISFRLECDAKEQEMNRERQTYDRQKILH<br>EEQERLIAAQTLLNQREEYIFERTKELSCFEKELEKTRTN<br>LEE EHRALKEEKSDLDLKIAALATREEAMIKRESLLDKRER<br>ELLMLQEKIACKEHDEIKKLTDKHQSALEKRIEFEALEHR<br>HRIEDEM EAKRTACEVREAGLSNRENAIQKREHSIKLE<br>LSALAEKEENVAKKMKLLEEREQNLHSTQKAAEIELQNM<br>QKEREDMLKMKLDLENSKSILEDKVKVLLCVQEKELTIA<br>EKNEFFVLEGKLKEEIDGLRAQKMELVAEADKLKAEKEK<br>FEIEWELIDEKREELRKEAEWVAERKAVDRYLKNEHDSI<br>KLEKENLRNQFKSDVESLSHEREEFLTMELEHSDWFSKIQ<br>QEREDFVRDIMIQRKELENCIDKRREEIETYLKEREEAF<br>EQEKARELQHINSQKELIAKELEHVASELQKLNDRMEIA<br>QDREKREKEWSEIKSSIEALDVQREKLQKQRELLRS<br>DREEIYQQIQLKLL EDLDIDSENRALSETPNKWRV<br>SFRTNMNAGVVQDIDDPNGQQVTANGGSKLKLSEKTP<br>DASPPTPAALSWVRKCAEVIFKHSSEKTIEHVECKNS<br>TKFVKVSEGNDFSPSKSVYHRKKTSGDGKRISMSK<br>WKDLQDPSVASEKMESKGHERTGREEMQSVRS<br>DSLHVDNEGLCIAKIESNTNKKVSALPLGRKRH<br>NNALSHDHADMQLPSQKHQRKTKQHGSADVEGITS<br>NCLFRMQMPNSDDCDSASLNPPSGCEELPVGCKD<br>QERENPEVSIKPSPEASQNTSAVLHFHISENGNS<br>NGSGSSSLVGDGMLLSGSNFHEMMKKQEKVED                                                                                                                                                                             |

|        |                            |                                        |                                                                                                                                                                                                                                                                                                                                                                                                                                                                                                                                                                                                                                                                                                                                                                                                                                                                                                                                                                                                                                                                                                                                                                                                                                                                              |
|--------|----------------------------|----------------------------------------|------------------------------------------------------------------------------------------------------------------------------------------------------------------------------------------------------------------------------------------------------------------------------------------------------------------------------------------------------------------------------------------------------------------------------------------------------------------------------------------------------------------------------------------------------------------------------------------------------------------------------------------------------------------------------------------------------------------------------------------------------------------------------------------------------------------------------------------------------------------------------------------------------------------------------------------------------------------------------------------------------------------------------------------------------------------------------------------------------------------------------------------------------------------------------------------------------------------------------------------------------------------------------|
|        |                            |                                        | QVVFEGEEPSKEIAKLAVELIANEGDKIKEQDVHNRDGDNEVEDEDEN<br>SLSAKQKLWKFLIT                                                                                                                                                                                                                                                                                                                                                                                                                                                                                                                                                                                                                                                                                                                                                                                                                                                                                                                                                                                                                                                                                                                                                                                                           |
| Egu2II | <i>Elaeis guineensis</i>   | KEGG<br>egu:1050600<br>68              | MASPRTRASPLATGATRSPVPRVAGASPPATGGTPLGDEAIWRRRLREA<br>GFDEESVKRRDKAALIAIYISKLEAEIYDYQHMHMGLLILERKEWTSKYEQV<br>KTSAESAEVVKREKAAQLSALAEARQREESLKKALGIEKECVANIEKAL<br>HDMRAESAETKLAYENKLAEARQLMEAAQKQFDEAERKLLASESLHAE<br>ASRSRNTALRNLQDVEAREDELRRDRISFKSECDAKEQEINRERQSLYD<br>RQKILNEEQERLIIAQTLLNQREEYIFERSKELSCFEKELEEARRNLEEKH<br>RALKEENSNDLKIAGLANREESVIKRESLLDKRERELLIQEKIACKEHDE<br>IQRLMDEHQALQRKRSEFEAELEQRRMMLDDEMEAKQMAYEIREA<br>DLNDRENAIREREHAIKLESSALAEKEEDVVKLKLDEREQKLHFTQKA<br>AEIEMQNMQNERAQILKMKRNVENSKSSLEDEKKEIQCAQEKLELTV<br>ERNELLVLERKLQEEIDNLRQKMELTAEADKLKAEKEKFEIEWELMDE<br>KREELRKEAERVAEERKAVDQYLKNEHDSIKLEKENFRNQFKSDVESLA<br>REREEFLSKMEREHLDFWFSKIQQEREDFVRDIMIQKKELENCMDKRRE<br>EIETYLKEKEEAFEKEKARELQHIGSQKELIAKELEHVASEMQKLNDRM<br>EIALDRERREKECSEIKSSIEALNIQREKLQKQRELLHSDREEIYEEIQRLLK<br>LEHLDIESENRALSETPNTWRLSWKTNTNADAAPDIDDPIEQKITANG<br>GSNLKLLSEKTSASPRSTTTLWVRKCAEVIFKLSPEKNIEYVEYKNSAK<br>SAGVSENGYSSPKAGSHRNKNSGDGKRISLSKWNDLQIPSVASEVM<br>ESKGHERRGRRETQSVRS DSPYVERNQGLCNAEIEGNREKELIEDSEKS<br>RNADGALPLGRKRLHNTLSHEHADMQLEPSRKHQKTRQNGSADVE<br>GVTSDCLHAVQMPNSDDCDPSSLNPTAGCEELPVGCKDQEYENPEVS<br>ISKTPEVSKDTSTIVRPHILENGNSHGSSENSLLGDGILLYGSNFHKMLKK<br>QENVGDQEIFEAEPSKEITPTMEQTADDGGKIKEQDGCNQDGDDE<br>VEDEDDRLSMKEKLWKFIT |
| Esa1   | <i>Eutrema salsugineum</i> | Phytozome<br>12<br>Thhalv10018<br>034m | MSTPLKVVQRWSTPTKATNPDSNGKGPANMVTPVPGRVSEIYYDDP<br>RILPEKVSELEKELFEYQHNLGLLLIEQKEWSSKYEELQQEFEEVNECLKR<br>ERNAHLIAVADVEKREEGLRKALGIEKQCAVDLEKALRELRSENAIEKFT<br>ADSKLTEANALVRSVEEKSLEVEAKLRAVDARLAEVSRKSSEVERKSKEV<br>EARESSIQRERFSYIAERDADEATLSKQREDLREWERKLQEGEERVAKS<br>QMIVKQREDRANEGDKIIKQKQKKELEEAQKKIDAANLALKKKEDDISSRI<br>KALAFREQETEVLKKSJETKERELLALQEKLDAREKVAVQQILDEHQAKL<br>EAAQREFELEMEQKRKSIDSLRSKVVEVEKREA EWKHMEEKVAKRE<br>QALDRKLEKHKEKEKFEFLRLKGVSSREKALKSEEKALETEKRKLLDKDII<br>LNLKAEVEKMKTENEVQLSEIHKEKEGLRVTEERSEYLRQLTELKEQLE<br>KCRSQEELLKEVEDLKAQRECFEKEWEELDERKAEIESELKNITDQKEK<br>LERHSHLEDERLKKKQAANDNMKRELETLEVAKASFAETMEYERSVIS<br>KKAESEKSQLLDIEMLRNLEADMQTKLEEREKELQAKEKLFEEEREK<br>ELSNINYLRDVARREMADMQNERQRIEKEKLEVDASKKHLEEQQTEIR<br>KDVDLVALTKKLKEQREQFISERNRFLSSMESNRNCPGCELLQEIVL<br>PDIDNLEMTNLSKLTNILENEAPRQEMRDISPTAAGLGLPVPGGTVSW<br>LRKCTSKILKLSPIKMAETSATRNLAQEPQSTEQANVNSGPSTMLQA<br>QSVSDTREVEVNNADSDGDQSNINSKAQEVEANSLSTLNADGQSRIR<br>GKARARVRRTHSVKAVVEDAKAIYGKSIEFNEDSTENVEDSSKAND<br>GNTGEPDHSGKGASKNGRKRGRVGLRGTCTTEQDGTESDGKSDSVTG<br>GERQRVKRRQKVTSEQQEVVGQRYNLRRPRRGAGKTALGKKNEETVT<br>VQQEEGIYSAQTIATASVGVAVSDNGASANVVQSETMADSEDTDAGS<br>PKRTCESAAMSEEDVNKTPQRAHSGNEYDGEEDSESEHPGKQSIGKK<br>LWTFLLT                     |
| Esa2   | <i>Eutrema</i>             | Phytozome                              | MATSRSERFPITPNTASNRLTITPGSRVLKSPLTEEVMWKRKKEAGFDE                                                                                                                                                                                                                                                                                                                                                                                                                                                                                                                                                                                                                                                                                                                                                                                                                                                                                                                                                                                                                                                                                                                                                                                                                            |

|        |                        |                                        |                                                                                                                                                                                                                                                                                                                                                                                                                                                                                                                                                                                                                                                                                                                                                                                                                                                                                                                                                                                                                                                                              |
|--------|------------------------|----------------------------------------|------------------------------------------------------------------------------------------------------------------------------------------------------------------------------------------------------------------------------------------------------------------------------------------------------------------------------------------------------------------------------------------------------------------------------------------------------------------------------------------------------------------------------------------------------------------------------------------------------------------------------------------------------------------------------------------------------------------------------------------------------------------------------------------------------------------------------------------------------------------------------------------------------------------------------------------------------------------------------------------------------------------------------------------------------------------------------|
|        | salsugineum            | 12<br>Thhalv10003<br>578m              | QSIKNRDKAALIAYIAKLESEVYDYQHNMGLLILEKDELLSKYEYEVKASV<br>NEADLAHRRDQSAVVSALAEAKKREEDLKKDVGIAKECISSEKTLHEM<br>RAECAETKVSAGSKMSEAHLMIEDALKKYADAEAKMRAAEALQAEAN<br>RYHRIAERKLKEVESREDDLARRLASFKSDSETRENEIDIERQTLSERRKS<br>LQQEHERLLDAQASLNQREDHIFGRSQELAELEKGLSAKTTFFEEERRA<br>LEDKISNLEIALASLAKREEAVSERESSVLKKEQELLVAEEKIATKESELIQK<br>VLANQEVILRKRKSDVEAELESKCKLVEDEIESKRRAWELREVDIRQRED<br>LVGEKEHDLEVQSRATAEKEKDITERSYNLDEKEKNLNAREKDINLKTTL<br>LENEKERLKQLDLDLQQLMSLEEKRRKRVDCATRKLEALKSETSDLSFLE<br>MNLKKELDLRAHKLELLAEADRLKVEKAKFEAEWEHIDVKREELRKEA<br>EYITRQREAFSMYLKEERDNIREERDALRNQHKNDVEALNREEREFMN<br>KMVEEHSEWLSKIQRERADFLGIEMQKRELEYCIETKRELENSSRDRE<br>KVFEQEKLEEEERISLQKESSEKELEHVQVELKRLDAERLEIKLDRERRER<br>EWAELKDSVEELKVQREKLETQRHMLRAEEREIRREVEELKLENLKV<br>LDDMSMAKMQLSNLSRWEKVSALKQKVVTRDDELYFQNGVSTVSN<br>SDDGYNSFMERQNGSTPSSGTPFSWIKRCTNLIFKASPEKSPMPDPHQ<br>EGGLPLENLKLDSSRREERAYTEGLSIAVERLEAGRKRRTGNTGRDTS GP<br>SSNKKRKHDDVTQPKPSDETDPHSVISSPQNPEDKHELPSQTQTP<br>SGMVVISETVKITKVTCEVINKVTNIDCSENPEAGTTMVEEQHDSG<br>CNETVVNVSETVTRKEAESDNRKEQSDDDGGVVA |
| Esa3I  | Eutrema<br>salsugineum | Phytozome<br>12<br>Thhalv10019<br>562m | MHVDTHLYDYKSIMHWTSTNEELQQAIDEASEILKRERMSKLIALNEA<br>EKREENLRKALISEKQFAAELERDLKYLQQEHSEVKSTSEAKLAEANALV<br>MGIKENSLEVDKRKRAIAEEKLSVINRKSSELEKLLKEVETREKVLQREHLS<br>LVTEREAHEAKKLTLEEDRLSEAKRSVNHIIEERIESEKTIKKKEKILKEKEE<br>FINSMLNDISMKEKAFAEAMKTNIDMKEKELHELEEKLIVREQMETGKLF<br>DDQNAVLDNRKHEFEMELEQMRISLNEELERKKSEVEQLEVEISHKGEK<br>LAKKESTLEKMEEIVKEKEKDLEARQEVVKEKEKALKAEKLLHMENKR<br>LLEDKESLRQLKDEIEIGAKTTKQESRIEEHESLRITKEERLKLFLRLQSEL<br>KQQIDRVEQEEELLKEREELKTAKGRLEKEWEALDEKRADKTREQKEV<br>TEEKENLRSLQTSEKHRLKREDIILRDNSKREVDDVEMQRESFEAGIETK<br>KLFSDNANIQTKREMEEVQYEKLALKREREISVKKRKTLYKQSVVYFM<br>GVDDSLRISLKEKREQICCAKERFALFLKENKLCNSCGEKFHFKVQSNRA<br>PDIETMKSEMKKLDLPAKNQTPDVENGDKLSDNSKSASLIGTLAAIKL<br>PESWQHYDTLDTLDTLDTLTVAGNDHEASGTEQSF AEIKSDKSRGR<br>GRSKSVRGRPQATKAASRDSKTSDEEIVKVEAETEFKNDNRGKRPVQD<br>PQFEAGSSGEKKEDDGNISMIEEENKGE EEEEEETERPDEASIGKKI WAF<br>LTI                                                                                                                                                                                 |
| Esa3II | Eutrema<br>salsugineum | Phytozome<br>12<br>Thhalv10006<br>601m | MFTPQRKPWISPAVTPRSETRKIGGVS NPRNDDRKGKAIASEDPVIST<br>LPPPIGTLTGEVYRGQAEEMDMGDWRRFREVGLLDEASMERKDR<br>EALLEKISTLEELYGYQHNMGLLL MENKEWVAKHEELNQAFQEAQEI<br>LKREQSSHLYALTTVEQREENLRKALGLEKQCVEELEKALREIQEENKI<br>RLTSEAKLAEANALVASVTGRSSDVENKIYSAESKLAEATRKSSELEMRL<br>KEVETRESVLQQERLSFAKERESYEGIFHKQREYLHEWEKKLQEKESIP<br>EQKRSNLQREEKVTEKEKNLKLKAKQLEEWDRKVELSVSKSKETEEDM<br>NKRLQELAAKEKESCTLQSM LVAKESELRALEEKLIVREGTEIQKLIDDQ<br>KEALAAKMLEFELECEERRKSLDRELQKKIEEVERQRVEINHSEEKQKR<br>NEALNKKFDRVNEKEIELEARVKTIKEKEKIMQAEKLSLDKQQLSDK<br>ENLKD LQQELENIRSEMMRKEEMIQEEHKSLEIKKEEREYLRQLSELKS<br>QIEKSRLEHEEFLSKEVENLKQEKEKFEKEWEILDEKQAEYNKERMIISEE<br>QAKFQRFQLLEGERLKN EENALRAQIKQELDDIRLQRESLEANMDHER<br>SALHEKAKLEH SKVLEDIEMMRRNIEI ELQKRKEQDEKDRQDRLAQFE                                                                                                                                                                                                                                                                                                             |

|      |                        |                                     |                                                                                                                                                                                                                                                                                                                                                                                                                                                                                                                                                                                                                                                                                                                                                                                                                                                                                                                                                                                                                                                                                                                                                                                                                  |
|------|------------------------|-------------------------------------|------------------------------------------------------------------------------------------------------------------------------------------------------------------------------------------------------------------------------------------------------------------------------------------------------------------------------------------------------------------------------------------------------------------------------------------------------------------------------------------------------------------------------------------------------------------------------------------------------------------------------------------------------------------------------------------------------------------------------------------------------------------------------------------------------------------------------------------------------------------------------------------------------------------------------------------------------------------------------------------------------------------------------------------------------------------------------------------------------------------------------------------------------------------------------------------------------------------|
|      |                        |                                     | DKRMKELSDLNHQKQALNREMEEMVSKRSALQKESEEIAKHKMKLKE<br>QQVEMQNDISELGTLSNNLKKRREEFARERARFLAFVQKLKDCESCGQ<br>LANEFALSDLQLPYNEEEATLPPNGVLCDLPESDASDSCNIKSLDGD<br>APASGGSGRPTMSILQKCTSLLFSPSKRAEHGMDTGKPEHLSSSVAVSK<br>EIKVEKPLPVDLRPRPSSSIPEEDEEYTVSRVQETSEGSQLEFQSAKRG<br>RGRGRPRKPKPALNPSSSVKHASPEESSKDEAGGHVSVTSEKTTGRGG<br>RKRQHIEDTTTTGRRKRQQTAVVLPQTPGQRRYNLRRNRTVDQAPA<br>DDEDNAAGGEYDADIAALAPSKDNVEETSESVVESLRARRLESSEVRVE<br>RVVTVETVTDADVAANNVGVSVANEELAPNIARSPSVEDEQRQRTV<br>DEDKNEEYEDGDEEVHDDQDDDDDEGGDDDDDDDDGDDDDGLKAGEG<br>SIRKKLWTFFTT                                                                                                                                                                                                                                                                                                                                                                                                                                                                                                                                                                                                                                                                 |
| Fho1 | Fokienia_hodgin<br>sii | onekp:UEVI_<br>scaffold_206<br>2441 | MMTPNRRGRWPGWSPTSRSPPAVDEKAVAVVEKSSGGSAGKAAVE<br>APPRNSLDGNGRFTPAAAPEVWRRFKESGLDQDSLEKKDRAALLH<br>VNKLDAELYDYQYNMGLLLIERKEWTSKYEQMKLALVEAESLKREQS<br>AHLVAITEAEKREETLKKSLGVEKQCVDLEKALHEMRSEVAEVKFISES<br>KLAQAREMVAGTEEKTLEAESRLHAAEALQAEASRKHAEETERKLQIEIS<br>IENSLRRDRQSFKSERDAHEVELSHERRNLLDWEKKLQDGDQRLLLEGQ<br>RLLNQREEYTNQRDEALKQIEKELEDKQIENDHSALKEKEVDISVRLT<br>ALSTREENAVKREIVIDKKEQELLVLQEKLASKENEEIQKLLDEHKAMLE<br>ARKIEFEAELEQKMISVEEELNRRSALELFEADIKSKEEKISKREQQIEKK<br>TDKLEKEKEVDARSKILKEREKTLKNEEKEIMIEKKLDGEREEINNEKQ<br>EIQNLKVSLEEEKQIFSEQEKLKVTETERNELQKLQTELKEEINRARK<br>QEIEKEAEELRLEKEKFEKEWELLDEKREQAKKELTLVEEKKRISKWLR<br>DEERLKQEKSAKLERIQNETEALHLEKEAFAASMQHERAEWLESIRRE<br>QADLIRDSELHRSDLENNIEKRQEEIEKLLREKEIGFQKEKERETQHISGQ<br>RELVSNEMEEMRLERKKLEKEREISKSRQHAETQWIEIKKDIVELQLQ<br>RDKLKEQREYLCKEREVSRLSEQLLENLKRELNISDDSLDIANKSGNRG<br>TGDVYGFSEQEAVPQKFFGTPASASAKGDPEPSSGRTVPSASGTPGRLS<br>WLQRCATRFFNQSPSPEKLIDGTGRKEENDRSPTMLPETTGAESERMT<br>GEIVVGLIQPTFSADDQNHDAETAETVDAQAQGTTKSSPAVKFDHS<br>APSRKGNNGSKSNDKSKVKVFKRTRSIKAVVEDARGIIDAPSDQEKNES<br>ESRQEHVQIQAAVADNRQDKEGRAGGDQNTSAQEINDSNRESLATD<br>KRSSKSGRKRRRGYSSKVTSEQDADDSEIQSEGVAGGRRRKRQQQGM<br>TNGSSSGLGTPGGRRYNLR |
| Fho2 | Fokienia_hodgin<br>sii | onekp:UEVI_<br>scaffold_206<br>2429 | SPVNEEMWRRLLKKVGLDEETLQKKDKAALIAHITKLETEIYDYQYNM<br>GLILLERKELISKYEQLKLTAAGEAGNFKYDLAAHSSAIAEAEKREESLRK<br>ALGIEKQCVADLEKALHEMRAESAIEIKFISETKLAKARELVASTEESLTA<br>ESKLHAGEALQAEAKHKHADAERLLQDVEAREDELRRQRQSFKSECEA<br>HEKELFFERQNLREWENLQEGQERLLDQRLNQRREEYVIERNEATK<br>QIEKELQDLKRNIEKEQSSLKEKEIDLGRGLADLTTRREALVKQEVINKKE<br>QELLLQEKLATREREEIQMLTNKHQVALEERKSVFEEEMKQRRKAVD<br>DELAYKRNAADVRELEIQCREEKISKREQQVEKKAELKEKDKELDARLR<br>IVKEREKCKIKEKEIETQLKQLEIERDEMNISKHVLETSKAALCEDRQOI<br>HKEQERLELTEKERDDLRIIQIKLKEEIDNFRQQEYELLKKDEVLNVEKEK<br>FEREWEILDEKTEQLRKEIEKIDNENKRVSKWLKDEERLKQERRMLRE<br>QMKIEEALRLEKESFANSKKQEEAELLANFEKERAELYRDIELQKSELEK<br>SIKQRQEELERNYQVRESVFRKEKQKEMHYINAQKELSDKESQEMKLE<br>RQRLDREKKEIVTTREHIDREWSEMKKDIEEMEIRREKLKELRESLHRER<br>EEFEAQLDQLKLLKDELKMTEDSLRLSEQPPS                                                                                                                                                                                                                                                                                                                                                                                                         |
| Fve1 | Fragaria vesca         | Phytozome<br>12                     | MFTPKRWSWDLTPRTGTGSGREMNSGKAKVNSGEGRGVVLFEPTT<br>PATGLVENGDRDGITRKLLELENELYEQYNMGLLLIEKKEWSSSQEEL                                                                                                                                                                                                                                                                                                                                                                                                                                                                                                                                                                                                                                                                                                                                                                                                                                                                                                                                                                                                                                                                                                                |

|      |                |                                                |                                                                                                                                                                                                                                                                                                                                                                                                                                                                                                                                                                                                                                                                                                                                                                                                                                                                                                                                                                                                                                                                                                                                                                                                                                                                                |
|------|----------------|------------------------------------------------|--------------------------------------------------------------------------------------------------------------------------------------------------------------------------------------------------------------------------------------------------------------------------------------------------------------------------------------------------------------------------------------------------------------------------------------------------------------------------------------------------------------------------------------------------------------------------------------------------------------------------------------------------------------------------------------------------------------------------------------------------------------------------------------------------------------------------------------------------------------------------------------------------------------------------------------------------------------------------------------------------------------------------------------------------------------------------------------------------------------------------------------------------------------------------------------------------------------------------------------------------------------------------------|
|      |                | mrna10337.1<br>-v1.0-hybrid                    | AQSLAEARDALKREQASHLIAISEVEKREENLRKALGVEKQCVDLEKAL<br>HETRSEIAEIKFIADSKLAEANALVASIEEKSLELEAKLRTADAKLAEVSRK<br>SSEIESKFKELEAGESALRRDRSSFSESEQEARETSKAWREDLLEWERKL<br>QEGERLARGQRNINQREERANEHDKSLKNKEKDLENAEKKIDATKET<br>LKRQEDDLTSRLASLALKEKASEYNAMRMNLEVKEKELLALEEKLDARE<br>RVEIQKAIDEHNAILHAKQGDFELEDQKRKSLDEELRNRLVVVEKKESE<br>VNHMEEKVTKREQALEKRGEKFREKEKDYESKMKALKEKEKSICLEEK<br>FEAEKKQLLADKEDLARLLAELEQIKADNEDKLRKISEESDRLKVTEERS<br>QCQRLOSELKQEIDKYMQQKELLKEAEDLKQQKELFEKEWEELDDKR<br>AEIEKELKSVREQEEVEKLSQLEGERLKNERAAAQDCIQREREDLALA<br>QESFAAHMEHEKAALAEKVQSEKSEMVHEFEALKRELETDMRKRLEEL<br>EKPLRERENAFAEERERELDNVNYLRDVARREMEDIKAERTKIGKERQE<br>ADENKEHLERQRVEIRKDIINGLLDLSGKLDQRENFIKEREQFISYVEKL<br>KGCTNCGDMISEFVLSNLQPSAETEGAEVLALPRLSDDYVVKVSHNESLA<br>AAERNNNEKSPADSKSPGGMSWLRKCTSKILIFSPGKKTESGALHKETP<br>FSLEENRELSNRLHAENAEVSGVAVASGLDQIIQSDSSTREAPNVLED<br>SQVTNLKGGSPKPRRRGRPAVHRARSVKAVVKDAKAILGEAFETNDN<br>RHQNGTAEDSANMHTESHDDSSLAGKRPARNRGRKRGRAQTSQVSVS<br>EHGGNDSEEQSESVMTGQRKKRREKAPLAEQPPNERRYNLRRSKAGG<br>KVAAAKVSDDLKNEEVDRARNTAEILYAKAAPATLTGFAGENGGS<br>THFVRCGLADTQDGGADGVENSTENMAVSEANGSTEGGKEFYVDG<br>EEYGSESRGEDANLIEDEDESEQPGASIGKKFWTFLTT                                                                                               |
| Fve2 | Fragaria vesca | Phytozome<br>12<br>mrna03889.1<br>-v1.0-hybrid | MFSPLRKAPAALSLTPRNTDKGKAVAYVDGPPPLGSLSEIRSGGGAKT<br>SPELQNADWRRFKEVGLLDEAMERRDRQELANKVDRLEAELYDYQH<br>NMGLLLIEKKEWELQHEELSQALAETQEILHREQRAHLIAMSEVESREE<br>NLRKILVEEKKAVAELEKSLREMHEEYTRTKRASEAKLADANALIVSVED<br>KSLVTDEKFLAAEAKLAEANKKSLEVERRLQEVETQENVLRREQASLAT<br>EREAHKETFYRQRVDLNEWKKLKEGEARLSNLRKLLNEKEEKTNENEII<br>LKQKEKDLYEAERKIESSNALLKDKEDDVNRRADLVSKKEVEVSASYIL<br>EMKEKELHALEEKLSSRENVEIQEHLQDQHRALDRKTQAFELGLEERRKE<br>FDKELSSRIDTVEQKELEISHKEEILKKQEKALDEKSERLKEKNKEVEVNL<br>KNLKEREKNFKADEKKLELERQQILVNIHQLQNKDEIQKIKDENVQLEQ<br>QIREGREKHAITEKEKSDHLRLQSELQQEINNYRLQNELLLKEAEDLKQE<br>REKFEKEWEDLDERRAKVDGELRKKVVEEKEQLERLQCEAERLKEERKA<br>VEDYRQREIENLKQERESFTAKMTNGQIALSEKAQSEHAQMVQDFES<br>RRRDLETDMQKRQDKMVKQLQERETAFFEEKDREYTNINFLKGVADK<br>QREELLSERNTNEKEREALALQKKELEANQLEMREDIDQLDKLSKKIKC<br>QREQLIEERGRFLAFVERVKSCDKDCGEITREFVLSDLQVPGMYNVEAVP<br>NSEHKESGWGEKLQQCKLVVSKVTSNKKLDVSTELPRPPAMQKQKE<br>PKLLASEEARGHSSHENEPQPSLRRCNDSANAEAAVADNNCKAVDGY<br>APSIDDYSFISSQEQDIPEDSEQSELKSGRRKPARGRKSRLSRTHSVAV<br>VEDAKKFLGETPEPSNASLLNESSYINEGDSSFTSISRKRPRPRSSRVESE<br>QDDCDSEGRSGSVTAGGHRRRQPVASAVQTPGGQRYNLRNRKTAG<br>TLAAASAAPHLKSRKESKPEVGAELIQVTTLKPVESTEERVVRFATP<br>EPRDTVNGKADATKLVEEAELSTELNGTESSHSTGGESGDSSGDESGD<br>DYDDEDHPGQVSIGKKIWTFFST |
| Fve3 | Fragaria vesca | Phytozome<br>12<br>mrna03889.1<br>-v1.0-hybrid | MFSPLRKAPAALSLTPRNTDKGKAVAYVDGPPPLGSLSEIRSGGGAKT<br>SPELQNADWRRFKEVGLLDEAMERRDRQELANKVDRLEAELYDYQH<br>NMGLLLIEKKEWELQHEELSQALAETQEILHREQRAHLIAMSEVESREE<br>NLRKILVEEKKAVAELEKSLREMHEEYTRTKRASEAKLADANALIVSVED<br>KSLVTDEKFLAAEAKLAEANKKSLEVERRLQEVETQENVLRREQASLAT                                                                                                                                                                                                                                                                                                                                                                                                                                                                                                                                                                                                                                                                                                                                                                                                                                                                                                                                                                                                             |

|       |               |                                          |                                                                                                                                                                                                                                                                                                                                                                                                                                                                                                                                                                                                                                                                                                                                                                                                                                                                                                                                                                                                                                                     |
|-------|---------------|------------------------------------------|-----------------------------------------------------------------------------------------------------------------------------------------------------------------------------------------------------------------------------------------------------------------------------------------------------------------------------------------------------------------------------------------------------------------------------------------------------------------------------------------------------------------------------------------------------------------------------------------------------------------------------------------------------------------------------------------------------------------------------------------------------------------------------------------------------------------------------------------------------------------------------------------------------------------------------------------------------------------------------------------------------------------------------------------------------|
|       |               |                                          | <p>EREAHKETFYRQRVDLNEWKLLKEGEARLSNLRKLLNEKEEKTNENEI<br/> LQKQEKDLYEAERKIESSNALLKDKEDDVNRRRLADLVSKKEVDSASYIL<br/> EMKEKELHALEEKSSRENVEIQEHLDQHRAILDRKTQAFELGLEERRKE<br/> FDKELSSRIDTVEQKELEISHKEEILKQKEKALDEKSERLKEKNKEVEVNL<br/> KNLKEREKNFKADEKKLELERQQILVNIHLQNLKDEIQKIKDENVQLEQ<br/> QIREGREKHAITEKEKSDHLRLQSELQQEINNYRLQNEILLKEAEDLKQE<br/> REKFEKEWEDLDERRAKVDGELRKVVEEKEQLERLQCIEAERLKEERKA<br/> VEDYRQREIENLKQERESFTAKMTNGQIALSEKAQSEHAQMVQDFES<br/> RRRDLETDMQKRQDKMVKQLQERETAFFEEKDREYTNINFLKGVADK<br/> QREELLSERNTNEKEREALALQKKELEANQLEMREDIDQLDKLSKKIKC<br/> QREQLIEERGRFLAFVERVKSCDKDCGEITREFVLSDLQVPGMYNVEAVP<br/> NSEHKESGWGEKLQKCKLVVSKVTSNKKLDVSTELPRPPAMQKQKE<br/> PKLLASEEARGHSSHENEPQPSLRRCNDSANAEAAVADNNCKAVDGY<br/> APSIDDYSFISSQEQDIPEDSEQSELKSGRRKPARGRKSRLSRTHSVKAV<br/> VEDAKKFLGETPEPSNASLLNESSYINEGDSSTFSIGRKRPRPRSSRVESE<br/> QDDCDESGRSGSVTAGGHRKRRQPVASAVQTPGGQRYNLRNRKTAG<br/> TLAAASAAPHLKSRRKEESKPESVGAELIQVTTLKPVESTEERVRFATP<br/> EPRDTVNGKADATKLVEEAELSTELNGTESSHSTGGESGSSGDES<br/> DYDDEDHPGQVSIGKKIWTFFST</p> |
| Gbi1  | Ginkgo biloba | GymnoPlaza<br>GBI0002263<br>1            | <p>WTSKYEQMKLAAAEAEENLKREQAAHLIAISEAEKREESLRKALGVEKQ<br/> CVADIENALHEMRSENAELKFTSENKLAQAREIVASTEAKALAAESKLH<br/> AAEALQAEASRKHAETERKLQVEARECALQRERQSFKSEREAREAEALA<br/> HERQNMWYEWKLLQEGQDRLLLEGQRLNQRREEYTNQRDDALKQIEK<br/> ELEDARKQIEKDQILKEKEADLSARLAALATREENAVKREIVIDKKEQEL<br/> LVLQEKLASRENEEIQRILDEHKATLEARKNEFEAEGLKQRSVEELEN<br/> KRSAAEMKEADINRKEEKINRREQLEKKAELKEKEKELDVRSKALKE<br/> RERTFKNEEKETEIEKKKLEGEREEINNAKQELEKIKNALEEKQQLSEQ<br/> ENLKVTEKERDELLTLQTKLKEEIEEFRAQKQEVVNEAEELKKEREKFEKE<br/> WEILDEKREQVRKELAQVDEDRRRVSKWLLDEEERLKQEKALREHIQ<br/> SDSDALRLEKEAFVSMQHERAEWFGNVQRERADLVRDIELHRSELES<br/> SIEKRQEEIERLLEEREMGFQKEKEREMMQJSAQRELARKEMEEMRLE<br/> RLKLERERQEITASREHAEREWTEIKKDIEELQIQREKLKEQRESLHKERE<br/> EILRLFDQLKLLKAEVNVKEDALKISDQQLIQQNVNRGKSHSPCPGDL<br/> GLSQEALRQNFITPVDASMKVNPEPSSGRIVTSASGTPSRLSWLQKC<br/> ASRLFNQSPKVVESVDQKEETERSPTPVPEVLVAETERATHETVNGT<br/> ENQPASSADVQNE DATVETESKN</p>                                                                                                               |
| Gbi2  | Ginkgo biloba | GymnoPlaza<br>GBI0002018<br>9            | <p>MEQKRRLVEDELENKQNVAEKVEINRKEEKISKREQLEKKAELKE<br/> KEKELDARSALKEREKTIKIEEKEMEIEKKKLEVEREEINNVKQELKIFKK<br/> ALEDERLQILTEQEKLEFTENERNELLNLQIKLKEEIDDFRGQKKELVNEA<br/> DELKIEKEKFEREWEILEEKREQLRKEIEQVDDERKRVSOWLKDEEERLK<br/> QEKSVLREQIKSDAEALRLEKEAFVSSMEHERAEWFAKVQRERADLVQ<br/> DIELRSRELESSIEKRQEEIERHFQEKELFQKEKEKEMEYISAQMEVAH<br/> REIEEMKLERQKLEKERQEIAANKDKSEREWSEMEKDIEQLHIQREKLK<br/> EQRESLRKEREFFIQIEELKLLKDELKMTXXXXXXXXXXXXXXXXXKCE</p>                                                                                                                                                                                                                                                                                                                                                                                                                                                                                                                                                                                           |
| Gma1l | Glycine max   | Phytozome<br>12<br>Glyma.18G2<br>80500.1 | <p>MFTPQRVWSGWSLTSNRSGVRRGGTSGSDLGPNSSGDGASTKGGV<br/> ALVENGNDREVLRVSSLEKELYEQFNMGLLLIEKKEWNSKYTEL<br/> SQDLVEVKDALDREKAAHLIAISEAKREENLRKALGVEKECVLDLEKAL<br/> REMRSEHAKIKFTADSKLAEANALVASIEKSLEVEAKLRSADAKFAEISR<br/> KSSEFDRKSLDLESQESALRRDRLSFIAEQEAHESTLSKQREDLREWEKK<br/> LQEGEERLAKGQRIINEREQRANENDRLCRQKEKDLEEAQKKIDATNV<br/> TLRNKEDDVNNRFANITLKEKEYDSLRLNDIKEKELSAWEEKLNAREKV</p>                                                                                                                                                                                                                                                                                                                                                                                                                                                                                                                                                                                                                                                          |



|        |             |                                          |                                                                                                                                                                                                                                                                                                                                                                                                                                                                                                                                                                                                                                                                                                                                                                                                                                                                                                                                                                                                                                                                                                                                                                                                                                                                                                                                                                             |
|--------|-------------|------------------------------------------|-----------------------------------------------------------------------------------------------------------------------------------------------------------------------------------------------------------------------------------------------------------------------------------------------------------------------------------------------------------------------------------------------------------------------------------------------------------------------------------------------------------------------------------------------------------------------------------------------------------------------------------------------------------------------------------------------------------------------------------------------------------------------------------------------------------------------------------------------------------------------------------------------------------------------------------------------------------------------------------------------------------------------------------------------------------------------------------------------------------------------------------------------------------------------------------------------------------------------------------------------------------------------------------------------------------------------------------------------------------------------------|
|        |             |                                          | <p>EMQKLLDEQNTILDVKKQEFELDELDEKRKSFEDGLKNKLVEVEKKEAEIT<br/> HAEKVVKREQALGKKAELKEKEIEYEQKVKALKEKEKLIKSEESLETE<br/> KRKIESEREELLTHKAEVEKIRANNEEELLRINEEIDRLKVTSEERSEYLR<br/> QSQLKHEVDQYRHQKELLKEAEDLRQQKETFEREWDELDELKRTDVEK<br/> ELKSVVQQKEELLKQQYEEELKNEKQDTQAYVQRELETLLAKESFA<br/> AEMELESLSAEKALSERNQMLLDFELQKKELEADMHNQLEQKEKDLI<br/> ERKKLFEEKRESELNNINFLREVANREMDMMLQQRSKSEKEKQADEN<br/> KKHLERQRMEMQEDIDVLVDLNRKLNQREEFIVERRRIFIEVEKLRSC<br/> QNCGEMISEFVLSDLQSSVDIENLEVPSPKLAADIVQGVSNENLASSR<br/> QNTGVSPATDPKSPVSGGTVSWLRKCTSKIFKISPIRKESEDSGTLRDV<br/> VTLSEKTNVEDSPGRIPDAENAEELSAFVNDVDFVQVRVQSGNDIVE<br/> VEADHEPSVENLNNVDSKAPEDLQAPDSKVGQKSRKGGGRPRVKR<br/> THTVKAIVKEARGILGESAEALPGESVDDHENEFPNGNAEDSANVNSE<br/> SQKPSNRRIPANVRKRNRVQTSSQMTVSGHGGDASEGHSDSLIPGQR<br/> KRRRQKAAAPPAQTAGESRYNLRRPKIGATTSSVRAMSGGGKESQGE<br/> VDRVKDTGEGIVDSKTSKSHSVGITNENGGSIHLEQSLKGAETRDGYG<br/> GDTIGTFVNNMALSEEVNGTADDVEENDA EYRSESHGEDAAGGVEN<br/> EDDEDYLQPGASIGKKLWNFFTT</p>                                                                                                                                                                                                                                                                                                                                                                                            |
| Gma1II | Glycine max | Phytozome<br>12<br>Glyma.08G2<br>56300.1 | <p>MFTPPRVWSGWSLTPNKSGVRGGTSGSSELGPNSGDGASAKGKGV<br/> VVVENGNDREVLVERVSSLEKELYEQFNMGLLIEKKEWSSKYTEL<br/> SQDLVEVKDALEREKAAHLISLSEAEREENLRKALGVEKECVLDLEKAL<br/> REMRSEHAKIKFTADSKLAEANALVASIEEKSLEVEAKLHSADAKFAEIS<br/> RKSSEFDRKSQELSQESTLRRDRLSFIAEQEVHESTLSKQREDLREWEK<br/> KLQEGEERLAKGQRIINEREQRANENDRLCRQKEKDLEEAQKKIDETNI<br/> TLRNKEDDVNNRIVNITLKEKEYDSLRTNLDLKEKELSAWEEKLNAREK<br/> VEMQKLLDEHNAILDVKKQEFELDELDEKRKSFEDGLKNKLVEVEKKEAE<br/> ITHMEEKVAKREQALGKKAELKEKEIEYEQKVKALREKEKLIKSEESLV<br/> TEKGKIESEREELLTHKAEVEKIRANNEEESLRINEEIDRLKVTSEERSEYL<br/> RLQSQLKHEVDQYRHQKELLKEAEDLRQQKETFEREWDELDELKRTDVEK<br/> EKELKSVIQQKEEILKQQYEEELKNEKQDTQAYVQRELETLLAKESF<br/> AAEMELESLSAEKAQSERNQILLDFELQKKELEADMNQLEQKEKDLI<br/> ERKKLFEEKRESELNNINFLREVANREMDMMLQQRSKLEKEKQADEN<br/> KKHLERQRMEMQEDIDVLVDLNRKLNQREQFIVERRRIFIEVEKLRSC<br/> QNCGEMISEFVLSDLQSSVDIENLEVPSLPKLAADIVQGVSNENLASSR<br/> QNTGLSPATDPKSPVSGGTVSWLRKCTSKIFKISPIRKESEDSGTLRDVV<br/> TSLVEQTNVEDSPGRIPDAENAEELSAFVNDVDFARRVQSGNDIIEVE<br/> ADHDPSVENLNNVDSKAPEDLQAPDSKVGQKSRKGGGRPRVKRTH<br/> TVKAVIKEARDILGESAEALPGESVDDHETEFNGNAEDSANVNSESQ<br/> KPYNRRIPANVRKRNRVQTSSQISVSGHDGDANEGHSDSLIPGQRKRR<br/> RQKAAAPPAQTAGESRYNLRLKTGATTSSARAMSGGGKESQGEVDR<br/> VKDTEEGIIDSKTSHSVGITNENGGSIHLEQSLKGVETRAGYGGDTTE<br/> TFANNMALSEEVNGTADDVEENDA EYRSESRGEDAGGVDNEDDEED<br/> YLQPGASIGKKLWNFFTT</p> |
| Gma2I  | Glycine max | Phytozome<br>12<br>Glyma.11G0<br>45200.1 | <p>MATPITPDSATLASRDPWKRLKQPAFDDNSIQRKDKIYDQLHHMGCLI<br/> FERKLLAFKYEQVKASIDSSEFMHKHDSAMNLSALIEARKREESLKMAI<br/> GINEACIASLEKALHEMRTECAETKVSASEKSVSEAHQLIDEAQKSTEAE<br/> AKLRAAESFQAEACGYYSVADRKLDRVAREDELRRQIKSFKSDRSQEL<br/> DSLQKELEDTKTNTNKEHGALCDEKTNLKLMEATLTIREALSRESELN<br/> KKEQELLDLQVKLASREDETQKVKAVQEAELGARKTNFEAELQIQKL<br/> VENEIEMKRWAWELKEVDLTQREEKLQEREHELEILSRTLGEKEKDLVD<br/> MSSALKEKDQSLRASEKELELNKVLQKDKKEINKTKLDVQMSLVLEN</p>                                                                                                                                                                                                                                                                                                                                                                                                                                                                                                                                                                                                                                                                                                                                                                                                                                                                                                                         |

|        |             |                                          |                                                                                                                                                                                                                                                                                                                                                                                                                                                                                                                                                                                                                                                                                                                                                                                                                                                                                                                                                                                                                                                                                                                                                                                     |
|--------|-------------|------------------------------------------|-------------------------------------------------------------------------------------------------------------------------------------------------------------------------------------------------------------------------------------------------------------------------------------------------------------------------------------------------------------------------------------------------------------------------------------------------------------------------------------------------------------------------------------------------------------------------------------------------------------------------------------------------------------------------------------------------------------------------------------------------------------------------------------------------------------------------------------------------------------------------------------------------------------------------------------------------------------------------------------------------------------------------------------------------------------------------------------------------------------------------------------------------------------------------------------|
|        |             |                                          | NLRQFDNAKERHEALKSETNDLSVLEVKLKEEIDVVRSQKLEIVAEADKL<br>EAEKAKFEAQWELLDEKKEELRKEAEYIAEKKAVSAFIKKERDKLRQEK<br>ENMRDQYKRDLES LTCEREEFMNKMAHEHDDWFGKMQQERANFLR<br>DVEMQNRNMNILDKRREEIESYLKEREKSFEEKNNQLEYINALKEKV<br>AKEYKQVSFEMRRLEVERPEISSDCEQRNKIEIHAQTEELKKVKDLKIVS<br>DDIALTELLNSDMESNQKISMKKKLNQRTLKHDDHLNSPQKIDANKI<br>SNGFDSSFVQNSSVVLPSPPVRFVSWIKRCKLVFRRSPEKSLVHDDDKG<br>CG                                                                                                                                                                                                                                                                                                                                                                                                                                                                                                                                                                                                                                                                                                                                                                                                    |
| Gma2II | Glycine max | Phytozome<br>12<br>Glyma.17G1<br>57900.1 | MELSTPNSSSKHLSITPGSRVLRNPLSDEQIWKRLRDAGFDEESIKHKDK<br>AALIAYIAKLEAEIYDHHMGLLILEKKDLASKYEQVKALAESELMHK<br>HDSTMNKSALTESKKREESLKKTVSIKDACIASLEKALHELRTESAETKVA<br>AESKFVEARQLIDEAQKFFTEAEAKVRAAESLQAEAKRYHNVAERKLH<br>DVEAREDNLRRQIISFKSDCDEKDKEMIIERQSLSERQKGLQOQEERLL<br>QSQSLNQREEHFLSRSQELNRLQRELEDTKVKFEKEHEALYDEKTTLLK<br>KEATLIQQEEELAKWKSELSKKEQELLEFAQLSNRESDKTQKVVASQE<br>AALRTKKYNLEVELQMQRKLVENEIEEKRRRAWELKEVDLKHCEQDILER<br>QHELEVLRSLSSEKEDLKDLSALEEKDQRLSAAEKDFELNKVLLQKEK<br>DHVEQAKQDVQKSLESLEDKIRQVDMEKEKLEAMKSETGDL SILEVKL<br>KEEIDLVR SQLELLAEAEKKA EKAKFEAEWELLDEKKEELREEAFIAK<br>EREAVSTFIRNERDQLREEKENLHNQYNQDLGFLASEREKFMNKMAH<br>EHA EWFGKMQQERADFLREIELQKQELNNLIEKRREEVESYLKEREKAF<br>EEEKNTLQYINALKEKA AKELEQVSLEMKRLQTERAEINLDRERRNRE<br>WAELTNCIEELEVQRDKLQKQRELLHADRIEIIYAQTEELKKLEDLKA VSD<br>DNAITEMLKSDMESNQKISARKNLKHQSLTHGGDRISNGFDTPLVQK<br>STVSPSPVRFVSWIKRCKTELIFRNSPERPLERNEDFLMGSDTGNVSNLK<br>KHLENDEPLGNIGKRQEIGFALEPKVIVEVPSLDDARRSEIESEAKDVN<br>GKSALLIPDGHRAGR LKRRRGNM TDKVG NPFVDV GQNKKSRAEEQT<br>NEKVQSGVSKVQQVLTSSNQ TQGNT ETRVIMVDKVIHVSEVTSEKL<br>DVLPI LSQEPRDNFSP T LGADQC NLHGETIDQS NYKTRQEDV LPCASS<br>VLGSTEEISKGNNEQVSEHC |
| Gma3I  | Glycine max | Phytozome<br>12<br>Glyma.02G1<br>01800.1 | MFTPQRKAWPAAAAFTPLRGGASAKGKAVAEGPPPPPLGSLTETTV<br>AVGLDAAGDAEDWKRFTKLGLLDEAVMQRKDHEALVEKVSRLERELF<br>DYQYNMGLLLIEKKEWNSKFDQLRQELAETEEILKREQSAHLIALFEVEK<br>REENLKKALSTERQCGADLERALRAMQEEHAQVKSSSH TKLAKANALV<br>DGIEEKSSVVDKLLDAEAKLAEINRKN AELDMKLRQVDVRESLLQKER<br>LSLATDRESFEATFYKQREDLKDWERK LKQREDMLCDGRQNLGEKEEK<br>IVETEKNLKQKERDLEVLEKIDSSNSLVKEKEAEI IQRVADLDVEEKKVN<br>SLKS MLEMKEKELLALELKSAREREGIEKLLGEQKATLDLKLQQVELEM<br>EQKQKSLVEEFSSKEEALEREVEVNHREK KVGKEEQALNKKAERIKEQ<br>NKEIEAKLSLKEKEKTMIIKEKELEKEKQQLADRESLENLNAELEKMK<br>AEISQKELQICQETENLKL TEDDRAEHSRLQLELQEIETRLQKDFIMK<br>EAENLREERQRFEKEWEVLDEKRAEITNKQH GIDMEKESLRKFQNSEE<br>ERLSEKQHM QDHIKKELEMLESEKESFRDSMKQEKHLLSEKVKNEKA<br>QMLQDFELKMRNLENIQKRQEEME KDLQERERNFQEEMQRELDNI<br>NNLKD VTEKEWEEVKAEGIRLENERKVLESNKQQLKSGQHEMHEDSE<br>MLMNLSRKVKKERERLVAERKHFL ELEVLEKLR SCKGCGEVVRDFVVS DI<br>QLPDFKERVAIPSPISPV LNDNPPKNSQDNIAASEFNISGSVKPVS WLR<br>KCTTKIFNLSPSKRADAVGALDMPGT SPLSDVNF SVENIDEELPTSLPNI<br>GARVIFDERQPAGGMAHSSDTPHLQSDNIGKEV GDEYSLSVGDHSR<br>VDSFVDGDPGDSQQSVPKLGRRK PGRKSKSGIARTRSVKAVVEEAKEF<br>LGKAPKKIENASLQSLNTDHIRES REDSSHTEKAIGNTRRRKQRAQTS                               |

|        |                            |                                          |                                                                                                                                                                                                                                                                                                                                                                                                                                                                                                                                                                                                                                                                                                                                                                                                                                                                                                                                                                                                                                                                                                                                                                                                                                                                                                                                       |
|--------|----------------------------|------------------------------------------|---------------------------------------------------------------------------------------------------------------------------------------------------------------------------------------------------------------------------------------------------------------------------------------------------------------------------------------------------------------------------------------------------------------------------------------------------------------------------------------------------------------------------------------------------------------------------------------------------------------------------------------------------------------------------------------------------------------------------------------------------------------------------------------------------------------------------------------------------------------------------------------------------------------------------------------------------------------------------------------------------------------------------------------------------------------------------------------------------------------------------------------------------------------------------------------------------------------------------------------------------------------------------------------------------------------------------------------|
|        |                            |                                          | RITSEQNAGDSEGQSDSITAGGRRKKRQTVAPLTQVTGEKRYNLRRH<br>KIAGKDSSTQNISNATKSVEKEAAAGKLEGDKNTPEVVETS LAVDDD<br>VQDTNLVQVSTVKTVEFSDHRAVRFELPKDVVDDNAAATETLNRVEE<br>NGTPEYQDEDGSTIHEVENDDDDEEEEEEEHPGEVSIGKKIFRFFTT                                                                                                                                                                                                                                                                                                                                                                                                                                                                                                                                                                                                                                                                                                                                                                                                                                                                                                                                                                                                                                                                                                                             |
| Gma3II | Glycine max                | Phytozome<br>12<br>Glyma.01G0<br>90100.1 | MQRKDHEALVEKVSRLERELFDYQYNMDLLIEKKEWSSMFDQLGQE<br>LAETQEILKREQSAHLIALFEVEKREENLKKALSTERQCGADLERALRAIQ<br>EEHAQVQFSHTKLAEANALVDGIEEKSLAVDKLLDAEAKLAEINRKN<br>AELDMKLRQVDVQESLLQKERLSLATDRESFEATFYKQREDLKDWERK<br>LKQREDMLCDGRQNLGEKEEKIVETEKNLQKERDLEVLKIDSSNSL<br>LKGKEAEIIRVADLDVEEKKADSLKSMLEMEKELLALELKLARSEREGI<br>ENLLGEQKATLDLKLQVLEMEQKQKSLVEEFSSKEEVFEQREVEVN<br>RREKKVGKEEQALNKKTERIKEQNKIEAKLKSLEKEKTMIIKEKELEKE<br>KQKLLADRESLENLNAELGKMKAEISQKELQICQETENLKLTEDDRAEH<br>SHLQLELKQEIETRLQKDFIMKEAENLREERQRFEKEKLQNSEERLQSE<br>KQHMMDHIKKELEKLVLEKESFRDSMKQEKHLLSEKVKNEKAQMLQD<br>FESKTRNLENIQKRQEEMEKDLQERERNFQEMLRELDNINNLKDVIE<br>KEWEEVKAEGIRLENERKELESNKQQLKSGQHEMHEDSEMLMSLRK<br>VKKERECLVAERKHFLVEKLRSCGCGEVVDFVSDIQLPDFTERV<br>AIPSPISPVLNDKPPKNSQDNVASSEFNISGSVRPVSWLRKCTTKIFNLS<br>PSKIADAVGASDMAGTSPLSVDNFSVENIDALPASLPNIGARVIFDERQ<br>PAGGMAHSSDTPHLQSDNIDKEVGDEYSLSIGDHSVDSFIDGDPG<br>DSQQSVPKLGRCCKPGRKSKSGIARTCSVKAVVEEAKEFLGKDPKKIENA<br>SLQSLNTDHIRESREDSSFTEKAIGNTRRRKRQWAQTSRITETELNAGD<br>SEGHSDSITAGGCRKKRQTVAPLTQVTGEKRYNLRRHKT                                                                                                                                                                                                                                                                        |
| Gpe1   | Glyptostrobus_<br>pensilis | onekp:OXGJ_<br>scaffold_201<br>0028      | PPRNSLDGNGRFVSTAAVAEPEVWRRFKESGLDHESLEKKDRAALL<br>LHINKLDAELYDYQYNMGLLLIERKEWTSKYEQMKLALAEAEESLKREQ<br>SAHLVAITEAEKREESLKKSLGVEKQCVSDLEKALHEMRSEVAEIKFISES<br>KLAQAREMVAGTEKNLEAESRLHAAEALQAEASRKHAEETERKLQEI<br>AIESALRRDRQSFKSERDAHEVRLSLERQNLDDWEKKLQDGGDRLLEG<br>QRLLNQREEYTNQRDEALKQIEKELEDACKQIENDHTTLKEKEADIIVRL<br>TALSTREENAVKRENLIKKEQELLVLQEKLASKENEEIQKLLDEHKAML<br>EARKIEFESELEQKISVEEELEKRRSTLELFADINFKEEKISKREQQIEKK<br>TEKLKEKEKEVDARSKALKEREKILKSEEKITEIKKKLDGEREEINNEKQE<br>LQNLKVYMEEEKQQIFSEQEKLVTEKERNELQKLQTELKEEENYRARK<br>QEIEKEAEELRLEKEKFEKEWFLDEKRDQAKKELTMVEEKKRISKWL<br>RDEEERLKQEKALQERVQNETEALHLEKEAFAAIMQHRAELLESIRR<br>EQADLIRDSELHRSDLENNIGKRQEEIENFLQEKEIGFQKEKDRETQNIS<br>AQRELVSKEMEEMRLERNKLEKERQEISRSRQHAEMQRIEIKKDIVELQ<br>LQRDKLKEQRESLSKEREVSRLVEQLDKLKAELNMSDGLDLIANKGG<br>NRRMGDFNGFSQEGVPQKIFGTPASASTKGDPEPSSGRMVRSASGTP<br>SRLSWLQRCATRRFNQSPSPEKMIDGSRQKEETDRSPMVVPETTGAES<br>ERMTGEIIVGLEIQPTFSADDQNHGGVETEVD AQNQGTTKSSPAVKF<br>DHSLPSRSGNGSKSNDKSKVKVFKRTRSMKAVVEDARGIIDVPSDQE<br>KNESESREQHLQNSAVPDDRQDKEGRPGGDQNTSAQEVDSDNRES<br>LANDKRSSKSGRKRGGYSSRVTSEQDADDSEIQSELSAGGRRKRQQ<br>GTANGGSSGLGTPGGKRYNFRHSTIASSVATQALSMDGKDRVVAQPE<br>EEEPKNLQGTSSGKDTKDSQQDSLKTVMVPSAQDSDNNIPQGETQ<br>DSPGCPDGGLED AVELDQVLSHELTKSETGDRYDETEGDDGGNEED<br>APADEIEDEEIDELDEDGDDEEDNDSSLLKKKIWKFLTS |
| Gpe2   | Glyptostrobus_<br>pensilis | onekp:OXGJ_<br>scaffold_200              | SPVNEENEMWRRLLKVVGLDEETLQKKDKAALIAHITKLETEIYDYQYNM<br>GLILLERKELISKYEQLKLTAGAEAGNFKRQDQAAHLAAIAEAEKREESLRK                                                                                                                                                                                                                                                                                                                                                                                                                                                                                                                                                                                                                                                                                                                                                                                                                                                                                                                                                                                                                                                                                                                                                                                                                            |

|        |                        |                                           |                                                                                                                                                                                                                                                                                                                                                                                                                                                                                                                                                                                                                                                                                                                                                                                                                                                                                                                                                                                                                                                                                                                                                                                                                                                                                                                                                                          |
|--------|------------------------|-------------------------------------------|--------------------------------------------------------------------------------------------------------------------------------------------------------------------------------------------------------------------------------------------------------------------------------------------------------------------------------------------------------------------------------------------------------------------------------------------------------------------------------------------------------------------------------------------------------------------------------------------------------------------------------------------------------------------------------------------------------------------------------------------------------------------------------------------------------------------------------------------------------------------------------------------------------------------------------------------------------------------------------------------------------------------------------------------------------------------------------------------------------------------------------------------------------------------------------------------------------------------------------------------------------------------------------------------------------------------------------------------------------------------------|
|        |                        | 9976                                      | <p>ALGIEKQCVADLEKALHEMRAESAEIKFVSETKLAKAHELMASTEESLT<br/> AESRLHAGEALQAEANRKRADAERLLQDVEAREDELRRQRQSFKSECE<br/> AHEKELFFERQNLREWEKNLQEQERLLDGQRLLNQREYVIERNEAT<br/> KQIEKELHDLKRNIEKEQSTLKEKEADLRGRLADLTTCQEALVKQEVIINK<br/> KEQELLLLQEKLATREREIQRILTDEHQAALEERKSVFEEEMKQQLKAV<br/> DDELENKRNAADVREFEIQCREEKISKREQVVEKKAELKEKDKELDAR<br/> LRNAKEREKSCMKKEKEIETLLKKEIERDEMNIKQVLEKSKAALEER<br/> QQIHKEQERLELTEKERDDLRIIQIKLKEEIDNFRQQEQELSKKDEVLKVE<br/> KEKFEREWEILDEKTEQLRKELEKVDDEKKRVSKWLKNEEERLKQERR<br/> MLREQIKNEEEDLRLEKESFANSKKQEEAELLANFQRERADLYRDIDLQ<br/> KSELEKSIEQRQEELERNYQVRELVFRKEKQKEMQYINAQKELSDKESQ<br/> QMKLERQRLDREKQEIVRTREHIDRECSEMKKDIEEMEIRREKLKELRE<br/> SLHKEREFEAQLDQLKKLKDELKMTEDSLKLSEQPPSQAIVNDYEVISP<br/> RHFDGGISQVACRQSIGMPFNADGFCSETHLTRSTTSASDTPSPLAW<br/> LQKCTSRIFKSP</p>                                                                                                                                                                                                                                                                                                                                                                                                                                                                                                                                                          |
| Gra1I  | Gossypium<br>raimondii | Phytozome<br>12<br>Gorai.007G1<br>78500.1 | <p>MFTPQRKVWWSGWSFTPGGKADGSGSDLNSNGVSVGKGGKAAFAEPL<br/> TPNCKDVGSEDQEEGLREKVLRLLENELFEYQYNMGLLLIEKKEWTSKYE<br/> ELNEALIEAKDALKQEQAAANLIAINDVEKREEILRKALGVEKQCVLDLEK<br/> ALRDIRSENAEIKFTADAKLSEANAVIASVEEKSLEVEAKLRADDAKLAEI<br/> SRKNSEIERKLQELESRENALRRERQSFISEREAHETTLSKQREDLREWE<br/> KKLQDVEERLAKGQTYVYQREERANENDSLFKQKEQHLEETQKMIDA<br/> AHKTLKEKEDDINNRLTKLTLKEKEWSVREKLEMKEKELLIEEKLNARE<br/> KTEIQKLLDEHNAILDETKRAFELEIDGKRKSLDLELKSVIDVEKKEVEVK<br/> HMEEKISKREQALDKKLEKFAKEKEFELKVKSLKEREQVIRSEEKNLEIK<br/> KKHMDADKEELLTLKAETEKLRIANEEQLSKMHEEKDRLRVSEERSEY<br/> LRLQLELKEEIEKCRLEELLKEAEDLKRQKEKFEREWEELDGGKLEVEK<br/> ELKNINLQKEKFEKEKLAEDERLKNEKQVAEDCIKRELEALEVAKETFAA<br/> TMEHERSVVAEKAESERSQRLYDLELLKSKLESDMQDKFEEMEKEFGE<br/> RKKSFEEEKERELDNINYLREVARREMEELKQERLKIEMERQEVNASKSH<br/> LEGQQIEIRKDIDDLVDLSKLLKDQREQLIKERNRFISFLEKQKSKNCGE<br/> ITSEFLLSDLKYLQEIENEGVPLPLSLADNYTSGNIFGNFVASERQMMS<br/> SVASGSPISAGTMSWLRKCTSKIFKFSKPAKNIEPHALKKNLVGPSLSSQQ<br/> VNMKGMSTTENEPELTSVAATESLEIDRFQSDTSTRDVEAGQDLSVDN<br/> QNNMDCKELEALEDSONCDLNHGKQVHRRSRPRAKVRRAKAVVND<br/> AEAILGKALEPNELEHPNGSVDSVHANALSRGESGLADGGTSRNERKR<br/> NHAQTSQISDSKQDVSEGHSDSIAAGQRRKRHQKVVSAIPTGQKRYNL<br/> RRPKNGVTVAKTSDMNRETEGAKDAVDQVNYSSMPASETGDASEN<br/> SGAHFLQQGETGPDTKDGNAGATKTFDANMALSEEVNGTPQGVGEY<br/> GDGNDYHSESHSEGHKDEDEDEDEDEEENLEHPSEVSIGKLLWSFLT<br/> T</p> |
| Gra1II | Gossypium<br>raimondii | Phytozome<br>12<br>Gorai.001G2<br>00600.1 | <p>MFTPQRKVWWSGRSLTPWKKVDGVSVDPNNSNGVVVGKGGKAAAFVESV<br/> TPDGNDLGSEDQEGVPEKVLRLLENELFEYQYNMGLLLIEKKEWISKHEE<br/> LNQELMEAKDALKREQAASIAINDVEKREENLMKALGVEKQCVLDL<br/> DKALRNMRANAIEIKFTADSKLSEANALIASVEEKSLEVETKLAADAKL<br/> AEVSRKSSQIERKSQELESRENVLRRERLSFISEQEAHEITMSKQREDLW<br/> EWEKRLQDAEERLAKSQRYVNVQREERANENDRLLKQKEKDLEEAQKKI<br/> DAANQTLKEKEDDINSRLTNLTLKEKEWGVVKEKLEMKEKELLVFEEKL<br/> NTREKAEIQKLMDDHNAILDEKKRKFDEIDEKRKSLDADWKSIVIEVE<br/> KKEAEVKHMQEKVSKQEQALDNKLEKLEKEKELELKVKTQKEREKTIK<br/> SQDKDLEIEKLMVADKEELLSLKAEEVKIRTANEEKLQKIHEETDRLRV<br/> TEEERSEYLRQLELKEEIEKCRLEELLKEAEDLQKQKDNFEREWEELD</p>                                                                                                                                                                                                                                                                                                                                                                                                                                                                                                                                                                                                                                                                                                                                               |

|        |                     |                                        |                                                                                                                                                                                                                                                                                                                                                                                                                                                                                                                                                                                                                                                                                                                                                                                                                                                                                                                                                                                                                                                                                                                                                                         |
|--------|---------------------|----------------------------------------|-------------------------------------------------------------------------------------------------------------------------------------------------------------------------------------------------------------------------------------------------------------------------------------------------------------------------------------------------------------------------------------------------------------------------------------------------------------------------------------------------------------------------------------------------------------------------------------------------------------------------------------------------------------------------------------------------------------------------------------------------------------------------------------------------------------------------------------------------------------------------------------------------------------------------------------------------------------------------------------------------------------------------------------------------------------------------------------------------------------------------------------------------------------------------|
|        |                     |                                        | <p>EKRKIEKELNSISQQKEKFEKQNLAEERLKKKQVTDYIKRELEALEV<br/> AKETFAATMEHERSVIAAKAESERSQMLHDLLELLKRKLEIDMQNRLEE<br/> MEKELGERKKSFEEEKERELDSINYLRREVARREMEELKQERLKIEKERQE<br/> VNASKMHLEGQQIELRKDIDDLVELSKKLDQREQLIKERNRFISFVEKL<br/> KSCKNCGEITSEFVLSDLRCLQEIENEVFLPTSADHEYISGNVFGNLAAS<br/> ERQKDEMSAPVGSVSGGTMSWLRKCTSKIFKFSKDSGPHAIK<br/> LNMEALLSGQKDNLEGTSKTEHEPELSFAAATSLDIHGVQSDSSRRNV<br/> DVGHDLSDVNQSNMESKEQEVHGDSQSSDLNRGKQVHKRGKPRAK<br/> RTRSVKAVVKDAEAIIGKTLESNELEHPDESRGESGLADGRATRNRKR<br/> NRAQTSQTQTADTEQDGDSEGRSDSVVGGQRRKKHKQVVLAMPPI<br/> GEKRYNLRRLKIGVTVAKDTADHVNNSEAPVPAGENGDASENGGADF<br/> LQQSETALDAKDDDAGTTKLDPHTALSEEVSGTPKGVGEYGDGNDY<br/> KSESRSEGLKGDGEDDGEDDEEVEHPGEVSGKLLWNFFTT</p>                                                                                                                                                                                                                                                                                                                                                                                                                                                          |
| Gra2I  | Gossypium raimondii | Phytozome 12<br>Gorai.003G0<br>33100.1 | <p>MASPTPGTGKALSITPGSRVSKSSLGDETIWKRLKEAGFDEESIKKRDK<br/> AALIAYIAKLEAELSDHQYHMGLLTLEREELASKYEEIKASAEATELMHK<br/> RDQAAHISALAEAKKREDGLKALGVEKECLASIEKALHEMRTESVETK<br/> VAAESRLAEARIMIEDAEKKFSEAETKFRAAKSLQTEATFIQRDAKRKLQ<br/> EVEAREDDLSRQIVLFKKDSDAKEKEINLERQSLSERKKIVQQEHERLLD<br/> GQASLNQREEHIFNRMEELNRLEKELEASKAELEKERRALKDDKSNLEL<br/> TLVSLSKREEAVIEREALLSKKEQELLVSQEKLANKESSEFRKVIASHENAL<br/> RTRNSEFEAELELKRMMVEDEIEMKRRRAWELKEMDINNKEQICEREH<br/> GLDVRLRILAEKEKDVAEKSNIIDVKENNSAFEKELELKKAALEKEKEE<br/> MSKMKLELQKSLLSLEDKRNQVDHEKEKLEALRSETHLSTLELKLKEEL<br/> DLVRAQKLELMADVDRLEVERAKFETEWELIDEKREELRKEAARVCKD<br/> REEISKYLKDERDRLRSVRDVMREQHNKDVESLNREDFMCKMVTTE<br/> HSDRFNKIQQERADFLGIETQKRELENCIEKRREELESSLKEREEAFERE<br/> KKNQLDHINALKEIAEKELEQATLEMKRLDAERTEIKLDRERREHEWAE<br/> LNKSIEELKVRHKLKQQRELLHADRKEIHFDIEELKGLDLKAALDNM<br/> TVAQMQRIVLSQLKASERNNLKQQAVLQNVESGSDKNKIFAVDGN<br/> GFNSPMAKPDSSPSGSARFSWIKRCSELIFKHTPDKAQMKPEERPLELD<br/> GEPKILEVPSEGEVFERTQAGRKRVDNMPNNGTKKSRQKDAVLEVE<br/> DNTHRVHSIEPNVLDQPELMSYNQSKGGADETNELIVDRVINISEAIP<br/> VKETVDDFSNVENIDQLQDTGEKDKSGEPLVPMGNVSQLNIHCQRT<br/> EDKSGKQKQKLEDNVTVPDDKVRTRSAGLQVL</p> |
| Gra2II | Gossypium raimondii | Phytozome 12<br>Gorai.007G2<br>27800.1 | <p>MASPTPGSGRALSIMPGRVVKSPSLDDETIWKRLKEAGFDEESIKKRDK<br/> AALIAYIAKLEAELFEHQHMLLILERKELASKYEQIKASAEASEIMQM<br/> RDQAAHASALAEAKKREDGLKSLGVEKECIASIEKALHEMRAESAETK<br/> VAAESRLAEARIMIEDAQKFAEAEVKFHAAKSLQTEASLFQRTAERKL<br/> QEVEAREEDLSRRIVLFKNDCTKEKEITLERQSLSERQKIIQQEHERLLD<br/> GQASLNQREEYIFRSQELNQLKELEASRVDIEREHAKALKDEKSKLELTL<br/> ASLSKREEVCIFHLTIEAITEREVLLSKKEQQLLVSQEKLANKESDEIRKAI<br/> ASHETVLRRTKSEFEAELEIKRMAEDEIEMKRRRAWELKEMDNNQRE<br/> DLIREREHDFVRSRILAEKEKDVTEKSNLIEEREKSLSGFEKELELNKVL<br/> ENEKEEIKMKLELQKSLLSLEDKRNQVDFAKEKQAMRSETHLSNLE<br/> SKLKEELDLVRAQKLELMANADRLQVEKAKFETEWELIDEKREELKKEA<br/> MRVHEEREAVLFLKDERDSLRRERDVMREKHNKDVESLNREDFM<br/> NKMVSEHSDWFNRIQQERAELLLGIETQKRELENFIEKRREELESSLKER<br/> EEAFEREKRTQFQHINALKERAKELEQATLEMKRLDAERIEIKLDRERR<br/> EREWAELNKSIEELKVRHKLKQQRELLHADRKEIHAEIEELKGLDLKA<br/> AVDNMMVAQMVCIVLSRQKASERKTLKEQTVMQNSGSGSVKNR<br/> VVADNNGFNPMSPKPSASPSARFSWIKRCRELIFKNAPDMAQM</p>                                                                                                                                                                                                                   |

|      |                        |                                           |                                                                                                                                                                                                                                                                                                                                                                                                                                                                                                                                                                                                                                                                                                                                                                                                                                                                                                                                                                                                                                                                                                                                                                                                                                                                                                                                                                                                    |
|------|------------------------|-------------------------------------------|----------------------------------------------------------------------------------------------------------------------------------------------------------------------------------------------------------------------------------------------------------------------------------------------------------------------------------------------------------------------------------------------------------------------------------------------------------------------------------------------------------------------------------------------------------------------------------------------------------------------------------------------------------------------------------------------------------------------------------------------------------------------------------------------------------------------------------------------------------------------------------------------------------------------------------------------------------------------------------------------------------------------------------------------------------------------------------------------------------------------------------------------------------------------------------------------------------------------------------------------------------------------------------------------------------------------------------------------------------------------------------------------------|
|      |                        |                                           | KPEERSLISDHEDVFLTSAGKLVLSHGCDGQKYKQYGRKPLGFDGEPKV<br>TVEVPSEDEVKGIHHLES GF EKS NAGKSLVSEEGIQAGRKR RDSSPSR<br>GTKRRRQTKDASVIQEEDCAHSVNSTEPNSLPDQPVLSYDQSQGGA<br>DETNALVVDKITEILEETFEKKVVVDSSNLGNTDHLQDIVAESMQGIPQ<br>SGGMCSLASASGENGGSGDPVIVQEAHLGKVSQVTKPYQPMKDVSE<br>GGTKLEDNVVPKLDENEKMGMRTRSKQKL                                                                                                                                                                                                                                                                                                                                                                                                                                                                                                                                                                                                                                                                                                                                                                                                                                                                                                                                                                                                                                                                                                |
| Gra3 | Gossypium<br>raimondii | Phytozome<br>12<br>Gorai.008G1<br>87500.1 | MITPRRKAWSP LTLTPPT EPQMAGVPNTSSGGIRGKGKAVAF AHDTR<br>KLPPPPVASLSGKGPLNVEVEEEDMEDWRRFKEAGLLDEAALERRDHE<br>ALAE RLSNLEGE LFN YQYNMGLLLIEKKEWTSKCEELKQELAEVEEILRR<br>EQAAHLIALSEVEKREENLAKALAAEKQC VADLEKALRDIQEEHVQVKL<br>SSDTKLANANALVAGIEGKSLEVEEK LRAADGR LAEVNRKSSELERKLO<br>EMEAESVLQRERLSFVAEREAYQATFYKQREDLNEW EKRLNKGEEKL<br>TELRRMLNQREEKVNENDRHFKQKERSLEELQNKIDLSTLKLKEMEDDI<br>GKRLTDLVSKEKEAESIRSTLEAKEKDLVALEEMLTARERVEIQKLVDEQ<br>RVILDAKRQEFEELEEKRSVDEELEGKIHEINQQEAEINHKEEKLRKQE<br>QALDKKSERMKEKEKDLEVR LKAVKDK EK FVKTEEKKLELERQQLYAAK<br>ENLQALKDEIDKIGSETSQQELRIQESEK LKITEKDRAEHIRLQSELKQQ<br>IVNCRHQEELLKEHEDLKQRENFEKEWDALDDKRAEIMKQKEIDEE<br>KEKFEKLQHSEERLKKEEAAMQNYACREMESLRLQKESFEATMKHEK<br>SNLLEEAQNERTRMLQDFEERKMNLETDMKNRFDQM QKDLQERIVA<br>FEEVKERELANLRCSKEDAESQLEELKSARCAVEREKQEVAMNRDKLKE<br>QQLEMRKDIEELGILSSKLDQRQQFIRERHSFLEFVEKHKSCNCGEVT<br>RDFVLSNFEIPDLQDRKILPLPQLAGETLSHHQRYVGGSGATNINRSPE<br>ADAQYPESAGRMSWLRKCTKIFISISPTKRNESKAERPSMLTATEAGVSI<br>QGEAGEPYLGITGDTV RNQLLQSNTIREVGDG SVPSADHSFGESKVQD<br>VPEDSQQSEQKSDHRKPRRKP KSGLNRTSVKAVVEDAKLFLGESPEG<br>PEPSNRVQSHETSHVNEESAGVSSHTVEGAGPRSNARKRQRQNSQ<br>VRDSELDAADSEGHSDSVTAGGRRKRQQTVTPGLQTPGQNRYNLRRP<br>KTTVTATAAQASSDVLKTRKEPEDGGLEGGVHTRKEPEDGGLEGGVH<br>TRKEPEDGGLEGGVHTRKEPEDGENRRSNLVQVTTIKNVEILESEVVKL<br>KTSVDVGGNEIAAKTVKSVDLIEEVDVTAENGDEDES WGRFH EDEED<br>EGDDEMENPGDVSIGKKIWTFFTS |
| Hse1 | Huperzia_selago        | NYBX_scaffol<br>d_2021345                 | DRAALLVHISTLESELYDYQYQMGLLLLESKDWEQKVEKMKSAIADVEE<br>NLKREQAANMIAITEAERREDALKRALSTEKQC VADLEKALKEMQAEH<br>TEVKENAERHIAQAKDMLVGMEEKSVKADSR LHAGEAIFAQASRKQA<br>DAERKLQEVQAREDALRRQQEFKVNCEARKHELDHEEDNLKEWEK<br>RLQDGGQRLLDGERILNKREEFVNQKDLDLR KIEEDVKVARKQLEQCR<br>SQLHQDEIESIARSTAI SLREEC AVKKEVALDKKEQEVLLLEERVASRECIF<br>EQHKRHIQETELFNCKERERLEALESSLK LKEDFFNDKKQGLDDLMKAL<br>DETRKEEVRTKLELQSTIDELERLRELVSVEQDDLEKKKQSCMALESEM<br>NQKEEKLSKREQQIEKKA EK LKEREKDVDRKLGVKEREKVLKNEEKQA<br>NADRR LIEQEKEGLVKEKEEIERWRIEILTKNQKIEEKEKLRAVEQEREE<br>LLL VKTQLKGEIDELRAEKHEFFLAAEDL KKEKERFEKEWDLLEKNEEA<br>RRQRESLEQESQRVSKWLQDEEERIKREKREMHERNHREHQALQAEK<br>EAFLNNSDMDKINLFEMVEKDRDNLARDLELHRVELEKSIEKRRDELEK<br>EVEELKIKLNEEIRRAQEEI WASKDALQLESKEVSKERSKFDKERQEMAK<br>QRDEVEEKWLEIKKDIEELQLQREKLREQRESLRNERAEVVM EAEK LK                                                                                                                                                                                                                                                                                                                                                                                                                                                                                                                                                                     |
| Hse2 | Huperzia_selago        | onekp:NYBX<br>_scaffold_20<br>00682       | SLREKNAVEREFSLDKKEQELLVFQERLTD RERVFEKREQEVRDKEASLA<br>EERKKLESSTVSFQQMEDSMAEKKKLAAMKKALDHKSKDLSTWKEE<br>LQEKAVDLEKQHQSLLMELEDL DTKHLLAARETDINKLHDNALKEKE<br>QCQEKGMLKGREKDLDEMLKILNREKGLADEKRQSVAEQEQLQQK                                                                                                                                                                                                                                                                                                                                                                                                                                                                                                                                                                                                                                                                                                                                                                                                                                                                                                                                                                                                                                                                                                                                                                                         |

|     |                                            |                                         |                                                                                                                                                                                                                                                                                                                                                                                                                                                                                                                                                                                                                                                                                                                                                                                                                                                                                                                                                                                                                                                                                                                                                                                                                                                                                                                                                                                                                                             |
|-----|--------------------------------------------|-----------------------------------------|---------------------------------------------------------------------------------------------------------------------------------------------------------------------------------------------------------------------------------------------------------------------------------------------------------------------------------------------------------------------------------------------------------------------------------------------------------------------------------------------------------------------------------------------------------------------------------------------------------------------------------------------------------------------------------------------------------------------------------------------------------------------------------------------------------------------------------------------------------------------------------------------------------------------------------------------------------------------------------------------------------------------------------------------------------------------------------------------------------------------------------------------------------------------------------------------------------------------------------------------------------------------------------------------------------------------------------------------------------------------------------------------------------------------------------------------|
|     |                                            |                                         | FNSLNKQIEEVEERTKKLELEKEKLQEERLQLEVVKQEREAILEVQVKLKE<br>EIDSLRACKQDVQREAE DLQVEKERFEKQWEFLDEKKVQLKKEEDDIE<br>QQRKFAKWIQEEEARLKEEKHELWQQIQKESVLNSEKRTFVLSMEV<br>EKADLFSKMQKEHEELAKDMELRGAELERCLEKRQLEVESQNKELELKL<br>EETRKKKEQELHLLRENAQKEMEFVLQEKQKLEKEREELLARKDKLEPE<br>RSDIKGDIMELQIQREKLMEQREALHKEKQVLMEEAVRLQRLKDEVKQ<br>VDDSLISEQFSQRDMNEGEVISPQRIQKDYNDVEEKKHYVPGGAEGG<br>KPLFGNAMTPGRLSWLQRCTSIFFQPSSE                                                                                                                                                                                                                                                                                                                                                                                                                                                                                                                                                                                                                                                                                                                                                                                                                                                                                                                                                                                                                                |
| Iso | Isoetes_sp.                                | onekp:PYHZ_ scaffold_207 6822           | EQDIWKT FREAGALDEESLEKKDRSALLEHISKLESELYHYQYQMGVLLL<br>QCDDRNKDCNKLKVAVEEERECLRREKAAHMLAVAEADKREDALKKA<br>LATEKQCVADLEKALDMQAEMTAEKEVAEKVSEAKTKANDAEHH<br>WYSAESKMRTAEALRAEASRKLAEVDRKLQEVESREDALRRQIQNFQA<br>ESEAQKSEVESERRNLVWETRLHEGQDRMQQSEQFLNKQEEYLNKK<br>DEALKKLENDLQEAKRSFDKERTAFQEAFAEKQMSVFLREEAGVE<br>REIATAKKEQELLLLQKLLSRDRVFDQREQLVKEIEASNIRERERLEALE<br>ICLKANEESLAEKTSSIGATLKDIIKAQKEELKKREQEIKDRAMEIKVEGLE<br>LDRKRQSGFNWEKRMLEEQRERFQNLTVLKSREDYLNKSKDETTLKQME<br>LDMQKQSNLEKEQLMIQKARKEFLAQTGSISEREKIVIEKAAIAKEEL<br>ELSDLKEQLTSADTIVQQRDNLLRVQTQLKDEIDDYRTQKQEVNKQV<br>EELKKEREAFAEKQWELLDEEKEQMRKEKEQSEQESKRFRSRLQNEED<br>RLKREKREMQEKILRESEALQAEKESFNRSMEAQKTELLNRAEREREELI<br>RHMDLRRIELERSIKKKEEAVEHQAQEQRLQLTEEIHKEKQEIQAMHD<br>AVQRELAEIKAREKLNEREEMSKYREKAQIEWEEIKKDITELQLQREK<br>LKEQREGLKREEREEL                                                                                                                                                                                                                                                                                                                                                                                                                                                                                                                                                                                                               |
| Kni | Klebsormidium nitens (before K. flaccidum) | (Koreny and Field, 2016) kfl00193_00 80 | MFDSPGTAILAEELHAREAAARSIRVWTAVNESVGVSVDRREENTERAL<br>TAVNPSGEEVWRRFRGAGALDEEVLVRREKEELQRQLDDVERELAD<br>YRYNLGVLILEHKKCKPQIDELEKALQRTREELQKEGRSLQLALDDVTRR<br>EDGLRASLKAERTVIADLKQSLEEMHAKLQAEKSSRERLARAQLEAG<br>AVKDRERSEELFEKAARDLKGAAQLEEGLVRESELDGKLRGLAEREDD<br>AASREKALNEGEAALNAGKRELTEGKIKLAERKRKVEGELEEEERKKLGRE<br>REEELRVEALRRSVEGEREQMQKEMQAEKAAEHDMSTRKAIEISVK<br>EDSLAAQEKALQMSQDELERKQEDANKRDQDLQREKLLGDEKREM<br>LRTEADLREQQKSMNEERARLAEQSEWQRIEAKIDARVKEIDAREAA<br>VQAFESTAESSAKELEEGAKALRERQAGLEEKKEAVQKKEEDLGKLEKQ<br>LKGRAQMLESERAALERRKGEDVLEREQAEKAAQLEMEAAAALLDKE<br>AQLEEQRQLASKDKDLAAREHELLLRESGTDENLRQQKEELEAQRQR<br>AEADVAKQLQQLQGDRAKGEALLQASRAQLDKERAAMQLELQETRA<br>SLEIEFQTKMLTADAATQRAAKSEVEKRVKDLERAEIRAERATVRLQ<br>ERLAGVDLEVERRVSAQLKERVSELEVRNREEVERRVSEGSKKGVEREV<br>KAQVKDAVKKAKEEAKAKYDQERGAAIQKAVRDAERKAEGEKRAAID<br>KAVKEERSRTAGQARAVSEAEGEKSSLQNGEGLEGVSQLTEGEQAGG<br>PKEGVPRRSWFGLGSPRRGAQPSEARENEEGERQILVDGVPPLQIDG<br>LLSQVGMETPPVAVNPVGSSEAAGVEGASADEVAVHAEPTPVVAVSAGV<br>NGAPSPKRPKLQSKRKQPETPPEEAPPEERPLKQRRRIADAGPDKPVEE<br>KHGGPVEALGAAVTAVGRAADTITGPFGLDLDLGFVPGHTDRKA<br>PREVSVKKPRWSLWPGFLSPRKAKAEEGGQDGAGTSPSGEEGAENL<br>PGGQVEGQSSPLENARNNDGGVEGVPVMDVQQGPLPTENETPPPEM<br>DLRGDETRAAEERATRVAKTPNTRVGRAVLPTPKPARTPKPPLSAVRTS<br>SRLRERTLSSDLKGTLEPTSATQLAGSSGKRGKSSPPGADVGPDAQSQE<br>PPKQTERVSPLTDGTRNQAPGKSAEIAGREQRDPSPAKTPGTGPARRL<br>QRALTAEEQAKIERIMARLEAEERAAIADEAAVGPLNARTSPDLAPER |

|      |                          |                                                 |                                                                                                                                                                                                                                                                                                                                                                                                                                                                                                                                                                                                                                             |
|------|--------------------------|-------------------------------------------------|---------------------------------------------------------------------------------------------------------------------------------------------------------------------------------------------------------------------------------------------------------------------------------------------------------------------------------------------------------------------------------------------------------------------------------------------------------------------------------------------------------------------------------------------------------------------------------------------------------------------------------------------|
|      |                          |                                                 | FLNAGSADGAKTSPPEREAAANADIVDGATVKGLEKVRGAPETGNSGLK<br>KAKVAVKRRSGERAGASGKTDETLIEAAAANKQELPNDQPQAPAP<br>NPMAPGGASAAVDAAELPTVSPSPPGPTSTLPPKTPKSAFGRAFDGFR<br>AAWFGGAGSSRGPASEGDEEGSLEGGVYRSQVVELRSIVGDLVEA<br>ADRDEDMEMGGPERLEFGTPEGVPFDGPEGEERGREAQQGEGLLN<br>TFTETVVEKSEAALREVVEKGQKAGSVIVKAKTAAFDLNETAMELAD<br>AAVGVASDVADDVTRSAADLADDVTALGGAVEATVGGVADELGTNI<br>GEALADELGAVHTRDAQGKSLVETGSDLVTGALGSLQGAGAAGSSAL<br>AADPSRGAEGGARSTRGGAKVQSKKEGGNGEERRGSKRKAPESGKKG<br>GKVTDSENEDDVGPKRKGVKRRVKQADSEDEAGLVDPRVVEFATKFR<br>GEVEGEDTPSEGGGKRHLRAVVDPRDGEDMSAGLRRYINLRKSTLVK<br>MHIWEPRGADFGTVSTGSEGIHTRGGASSTPRNLQRSVFGGDNPFLE<br>DIAPGNPHSL  |
| Ksu  | Klebsormidium<br>subtile | (Koreny and<br>Field, 2016)<br>NCBi<br>JG442173 | GEAALKAGKREVIENGIELAGRKRKVEGELEEEERKKLEWKRQEEELRIEA<br>LRRSVEGEREQMRKEMQEERAAERDLSARKADISTKEESLAAQEKAL<br>QASQEELERKHKNAIKRGQDLQREKLLGDEKREMLRKDADLREQEKS<br>MEEKRARLTEQESEWRRIEAKIDARVKELDGREAAVQAKESAAESSTK<br>ELEECCAALRERQAVL                                                                                                                                                                                                                                                                                                                                                                                                           |
| Lan1 | Lycopodium_an<br>notinum | ENQF_scaffol<br>d_2018070                       | KKQELDNLVKALEETRKEEVRTKLELQNTIDELEKLRESMKVEQEELGKK<br>RQSCMVLEAEMNQKKEKLLKKEQQMEKKAELKEREKDLGKMKGV<br>KERERGLKNEEKRAEAKRLIEQEKEGLIKEKEELEKCRLEILAENKKIEDE<br>KEKLSAIEQEREDLLHVKTQLKGEIDDLRAQKQEIILAAEELKKEKERFEK<br>EWDLLDEKNEQIRKERDSLEQESRRISKWMQDEEERIKKEKRDMMHER<br>NHREYEILRAEKETLLNSSEADKRSLFEMVEKERHDLARDIELHRVELER<br>SVEKRKTEVEKEAEELKLLNNEEIHKAQEEIRTSREAIQRESEEIQAQRSN<br>FEKEKQEMAKQRKEVEEKWLEIKKDIEELQLQREKLKEQRESLRNERTE<br>VLMEAERLKKLRDELKEGDESIQISEQQPSHKFANDYEVLSPPQLLEAG<br>FSHSRGPEGKTLPVGLNAAVASECSPSKLAVSGRSVTPGSLSWLQRCAS<br>RLFPNSGGDKAEPNTLHGRSNGSATIIDTPKQEQSK                                                    |
| Lan2 | Lycopodium_an<br>notinum | ENQF_scaffol<br>d_2083706                       | EALKLLDNNLLEKKEKIEKDRTLLHQDEDDLNARMAAFSLREEAAIQRE<br>VALDRKEEELLYQERLVSREEREIENEQQVKDMESNIAKEREELKVFESS<br>LKGLQDYIDEQKQKQDAMAKVLDEKKNIKNERELQENIASLENVRKI<br>ISTEREELDGWRDSIAKREDAVEHTKENLLKKEKQLEEESENIKKREEEL<br>ARVFKTLSEREKALNHEESQVEEGKAKLKQQTTELQKEKGVVKKERRDI<br>EEVSQQVLAKEEQLRMIEEEREDLLQIKGQLKEEIDSLREHRLKVDHDA<br>EELRNEKERFEKNWELLDERKEQVQKEREHVELESKRAEKWLQDAEIR<br>LKQEKELWEKINKELESVYSEKQAFLIHMEKEKGMFLFAAIQKEREELSR<br>DMELHRTETERSLEEKRAEIEQQKAEVELKLAQASHKETENIQFLOEHA<br>QKERE                                                                                                                                          |
| Lan3 | Lycopodium_an<br>notinum | onekp:ENQF<br>_scaffold_20<br>85347             | TEQDFSKQLEGGTLDVLSLEKTDRSALLNHISLQKELYDYQYQMGLLL<br>VECKNWGPRYDKLKAASVETEENWQREEMHAKAIDEAKKREEALK<br>QSLEIEKQCILDLEKALKEMQLEVTEGKEAAGKQLSQARILVNEAEEKSL<br>LAESKLHSAEALHAEASRKLAEATERKLQEIAREDALRREQHKLADYE<br>ARKGDLDEEENLQNWELRQEGQDRLRQGEKLLNDREEVYVEKEEA<br>LKHLEKAIKDERVLEKEHSRLRQEEADLNAQMAAISLREKTTIEREVSL<br>DKKEQELLIFQERLVNRERVTEKHEQEVDKKEASLAEKEKLECARISLQ<br>QMEDSTNEEKKKLAAMTKVLDGKNKDLSTREEELQEKVADLEKLHQNI<br>LIEREDLDKTKHSLAAREADINKLLEDVHKEKEQCQEERDKLKDREKDL<br>DEMLKRLVSKEHDFANEKRQFMIEKEELEQRFSSLYKERDEVEERKKEL<br>KLEKEQLQEEMQLEVIKQEREDILKVQVQLKEEIDSLRGCKHDVQREA<br>EELKVEKESFENQWFLDEKKEQLRKDEEDIKQERKKFAKWVQDEEAR |



|       |                              |                                     |                                                                                                                                                                                                                                                                                                                                                                                                                                                                                                                                                                                                                                                                                                                                                                                                                                                                                       |
|-------|------------------------------|-------------------------------------|---------------------------------------------------------------------------------------------------------------------------------------------------------------------------------------------------------------------------------------------------------------------------------------------------------------------------------------------------------------------------------------------------------------------------------------------------------------------------------------------------------------------------------------------------------------------------------------------------------------------------------------------------------------------------------------------------------------------------------------------------------------------------------------------------------------------------------------------------------------------------------------|
|       |                              |                                     | LKEEKRELWQQIQKESELLNSEKRAFVLSMEMEKADLFSKVQKEREELA<br>RDIELRGAELERCLEKRRMEVERKSEELELKLEEILRKEKLDLQMKETA<br>QKEMEFVHKEKQKLEKEKEEILNQKEKLEPERCEIKGDILELQIQREKLM<br>EQREALHKEKQELMQEAERLKSLRHEVKQVDDSLNSEQVSHRDIHEG<br>EVLSPQRVERDHTLQNEGIEEKDRFRDSEAEGTSGMAVFGSAVTPGRLS<br>WLQKCASIFYQPSSE                                                                                                                                                                                                                                                                                                                                                                                                                                                                                                                                                                                               |
| Lde1  | Lycopodium_de<br>uterodensum | onekp:PQTO<br>_scaffold_20<br>83887 | SPEDNEFIVGASDRSRSEQEIWKQFKDAGALDEESLEKKDRAALLAHIS<br>TLESELYDYQYQMGLLLESKSWGPKFEKMGKAIADAENLKREQAAH<br>MIAITESERREDPLKKALSTEKQCVDLEKALKEMQAELAEVKENAAG<br>QLAQAKSLLVGLLEEKSAKADSRHLHAGEAILAQASRKQADAERKLQEVQ<br>AREDALRRQQQEFKVNCEVRRRELDHDEENLKEWEKRLQDQGNRLL<br>DGENIINKREEFVNQKDFDLKKLDEDLKVARKQLEQSRLQLQDQDEIDLK<br>ARITAI SLREESAVQKEVALDKKEQEVLLLQERIASRECIFEQHERHVEEA<br>QSFNLKERERLEVLESSLKSREDSFSEKKQELDNLMKAVEETRKEEVRTK<br>LELQNTIDELERLRESMKVEQEELGKRRQSCMVLD AEMNQKEEKLLK<br>EQQIEKKA EKLEREKELDGKMGVKERERGLKNEEKRA DAERRLIEQE<br>KEGLTKEKEELEKWRLEILAESKKIEDEKEKLRAIEQEREDMLNVKTQLK<br>GEIDELRAQKQEIILAAEELKKEKERFEKEWELLDEKNEQVRKERESLEQ<br>ESRRISKWVQDEEERIKKEKREMHERNHREYDILRAEKEALLNSSEADK<br>RNLFEMVEKERDDLARDIELRRVELERNIEKRKTEVEKEAEELKSKLNEEI<br>HKAQEEIRSRDSIQQESEEITQRSKFEKEKQEMAKQREEVEEKWLEIK<br>KDIQELQLQREKLKEQRESLHNERAEMLMEVERLKKLRDELKEGDES<br>VQISEQQ |
| Lde2  | Lycopodium_de<br>uterodensum | onekp:PQTO<br>_scaffold_20<br>83719 | MQSETADGKREAEKLLQAREMVTDAEERSLLAEAKVHSAEALHAEAS<br>RKLAEIERRLQEIEARENALRRQLESFNNECEARRMDLNLEENLQKWE<br>TRLQESQNRRLRQGEHLLSSREDYVYQKSEDLKLLLEDKLEKLEKLEKDR<br>LLHQDEGDLNARMAAFSLREEAEIQREIALERKEEELLYQERLVSREQEI<br>IQNEQLVKDMESNIVKEKEDLEVFESSLKGLQDFIDEQKQKQDAMATV<br>LDEKKKEVENKEQELQEKIASLENVRKMISTEREELDGWRDSIAKREDA<br>VEHTKENLLKKEKQLEEESENVKKREEQLANAFQTLAEKEKALNDEESQ<br>IEEGKAELKRQIEELQKEKGDVAKERRELEEVRRQVLAKEEQLRMIEEE<br>REDLLKVKGQLKEEIDSLRECRKIDHDAEELRNEKERFEKQWELDERK<br>EQIQKEREHVELESKRAEKWLQDGEIRLQKQEKRELWAEIHKESKSVYSE<br>KQAFLIHMEKEKGRFAEIQKEREELTRDIELHRTETKRCLEEEARAEIQH<br>KPEIELKMAQTTHKETEKLSLQEHQAQKVRREDINRERQKLEKEKEELAK<br>QRIESELERAIEKNDIEELTLQRQNLKEQREGLRLERNEVLEEAGRLRKLK<br>DEIEADTVEQSDKSALKQIIHGEVLSPLCTQPMQDPNLDIKTPFMVDG<br>VEGSSGKEVSTPPTPARFSWLQRCASIFF                                                                                  |
| Lde3  | Lycopodium_de<br>uterodensum | onekp:PQTO<br>_scaffold_20<br>12132 | ILDLEKALKEMQLEVAEGKEAAGKQLSQARILVNNAEEKSLMAESKLHS<br>AEALHAEASRKLAEATERKLQEIEAREDALRREQHKLNAEHEARKADLDT<br>EEENLQNWDRKRLQEGQDRLRQGEKLLNNREEYMYEKEEGLKQLEKAI<br>KDERVLLEKELTRLRQEEADFNQAQMAAISLREKEREVSMDKKEQELLIF<br>QERLVNRERVIEKHEQEVKDKASLAEEREKLECARIGLQRMEDSVNEE<br>KQELADMKEVLDGKNKDSIREEELQEKVADLEKLRQGILIEREDLDKM<br>KHS LAAREADINKLNEVVHKEKEQCQEEREKLDREKDLDEMLKQIVSK<br>EHDFANEKRQFMIEKEELEKQVSSLYKERDEVEERKKELKLEREQLEEE<br>RMQLEVIKQEREDILKIQVQLKEEIDSLRGCKSDVQHEAEELKVEKERFE<br>KQWFEFLDEKKEQLRKDEGDIKQERRKFAKWIQDEETRLKEEKRELWQ<br>QIQKESELLNSEKRAFILSMEMEKADLFSKVEKEREELARDIELR                                                                                                                                                                                                                                                                                        |
| Mac1I | Musa<br>acuminata            | Phytozome<br>12                     | MFTPQKKGWPGWSPSPRVGDGVDNGMTPPVVNTRSQSVLAFLLKGG<br>GKGKGNNTAEALPLPLPLQASLGENGDTVVVGGGDAEVWRNFREAG                                                                                                                                                                                                                                                                                                                                                                                                                                                                                                                                                                                                                                                                                                                                                                                      |

|        |                   |                                                             |                                                                                                                                                                                                                                                                                                                                                                                                                                                                                                                                                                                                                                                                                                                                                                                                                                                                                                                                                                                                                                                                                                                                                                                                                                                                                                                                                                                                                                                                                                                                                                                                    |
|--------|-------------------|-------------------------------------------------------------|----------------------------------------------------------------------------------------------------------------------------------------------------------------------------------------------------------------------------------------------------------------------------------------------------------------------------------------------------------------------------------------------------------------------------------------------------------------------------------------------------------------------------------------------------------------------------------------------------------------------------------------------------------------------------------------------------------------------------------------------------------------------------------------------------------------------------------------------------------------------------------------------------------------------------------------------------------------------------------------------------------------------------------------------------------------------------------------------------------------------------------------------------------------------------------------------------------------------------------------------------------------------------------------------------------------------------------------------------------------------------------------------------------------------------------------------------------------------------------------------------------------------------------------------------------------------------------------------------|
|        |                   | <p>GSMUA_Ach<br/>r8T14400_00<br/>1</p>                      | <p>LLDESALQNKDREALVQRILALEKELHEYQYNMGLLLIEKKDWALKYEEI<br/>RQALMDVEETLKREKLAHLASISEFEKREENLQKALGVEQQCVSDLEKA<br/>LREMHSELAEVKFTSDKKLDDAHLEAGLEEKYLEVEQKLHSADAKLAE<br/>ASRKSSVANRKLLEDVEAREHKLQKEYLSLSSEWKLHEKGITEQREHLCY<br/>WEKKLQDSQKRLVESQRFLNQREYQANEADRFHKKKEAELEESRKMIE<br/>ATKKSLSKSEEDITIKLRSIAAKEKEIDVKIESLGKKEKDLFSREETLNARER<br/>VEIQKLLDDHNALLISKREEFELNLEKRRKSFADLEGGVHEVEEKKREID<br/>CMEDQVKKREQALEINLQKLMDEKELDSKSKASKKWEESVKNDERK<br/>LEKDRQHLASECEELLKCNSELESLKAAIESSKKQIINEEENLRLTKVERED<br/>HLLLQSNLKQEILDCRLMKELLRDTEDLQQRKFFEEWEVLDKRLAL<br/>EAEIKKFNDEREKVEKWQCHEKERLNSEALIAKANFERELEELSQKEEAL<br/>EKAMEHERLEAFELLKREHADMDRELELRKHELQMDMQMGMQMEK<br/>KLLDKENEFQRTDLELSQMISLSSLNDSKSKRLKMEEDRLEREKEDILS<br/>HRKRLEVEQLEIEKDIDALCMLSRNLKEQREEFMKEKEHFLDQAEQKTC<br/>KNCGHPGLDGMGTYCILDAGNVLLPNLVFEERSNNMNAKSSPNAMVS<br/>VPAASGGRMSWLQKCSRLFSPGKKTSCPKVFSFHGVADFSYRQENKEP<br/>KRLGEAGEEPEPSLEVADNSIDIMRTWMDNGAREVVDDYVMPSSFAQ<br/>NERENFAPAESDTPESLKQRRSQPRRRGRPKAVKRTGTTKAVVTDVK<br/>AILGKSSNEKNHGSQDLVLANSTTSAGQKRCVAQISGMTTSDLNLGDS<br/>EAHSESISLGGRRHKKRQILAPAAQIPGEKRYNFRHSAIAAVTTAAQTIFE<br/>RTKGPKAGGHEDSTGNEIPMQSGGEEGSARPVVEPVSVDVSKKASN<br/>MLQKTAVESTTEVHEIFPNKIVQAESNDDVKSVEHSDQSEDGFVVDDA<br/>ATGTDPATPSNGGCEDEDEEEYDQLNASIGKKLWTFTR</p>                                                                                                                                                                                                                                                                                                                             |
| Mac1II | Musa<br>acuminata | <p>Phytozome<br/>12<br/>GSMUA_Ach<br/>r6T09340_00<br/>1</p> | <p>MFTPQNKGWLSPIRRGGADDGSGSTANPRGGGLGGLASTKGGKGSV<br/>VEAAPPQALLGDDGEDAFGGSTEVEAWRRFREAGLLDQSVLQRKDR<br/>EALVQRITELEKELHEYQYNMGLLLIEKKESIARYEEVQALAEAEIILKR<br/>EQTAHLIAISEYEKREETWLKDLGVEKQKVSALAKDLREVRFEISEVKFSS<br/>ERKLSEHALETGLEEKYLEIARMHAADAKLAEAGRRNSETNRKLEDI<br/>EAHERKLQRDCLSLTSEKAHEKDLLEQREHLFDWEKRLQESQRRLVEE<br/>QRLNEREDSANEADHILKKKETELETREAEASKRSLKLEEDDITIRLSS<br/>LASKEKEAEIKMGSLEKRELFAREEKLNSRERVEIQKLLDDHNAML<br/>SKKHEFELEMENQRKSFEEMKAKIDEVEEIKKELDHKEEQILEREHALE<br/>INMQKLKEMEKNLESKSQALKRWEESVQIYEKLEEDKQQLDRDRADI<br/>VKSISELESKVTIEAAKEQIIEEKLRLTKEEREHNLQSKLQKQIEDY<br/>MIMKDSLRCRSEDLRQQREKFEFEWQLLDEKQLALELETQKINDRVR<br/>FGKWQYDEEERIRNEEKAKRISIATELEDLRMKKQAFKTEMEHERLNV<br/>HEMLTRERSAVAREFELRKDELEMDMRKRQEAMEKDLQDRESEFQR<br/>KMTIELDEIRSVSSDFELKSRNLEMEQDRLEREKEDLSAFRESLKTQLEI<br/>QKDIDTLRVLSRELKDQREKFVEERDRFLGLANQFKICKKNGSSVCNLD<br/>LLGLQNTDVVQLPSLTFEDRLEAKDSETS PRHMVSPSVSSGGRLSWLR<br/>KCSGFFSFSPKGSSETAQNQVKNPISLDVRLAREALDGEASDEPAPSQ<br/>GIFAKSFDTRTQSDSGIRDNEVSKRLGRAREELESSFGLSVPPRNESQP<br/>EPSNEKPRQPKRSGRPRKISRTRTVKAVVEEAQAILGETSMGKNGQPN<br/>GLAKRSLNIQESTEGNLVHAGQKRGLTHISVAAASELDGEDSETRSEIS<br/>LGRRRKRQINIPETQTPGEKRYNFRHSTIAAAARSISDQTKGHRGGH<br/>QQPSGDESLRGDGDGEGTSLRLDVEPASSFAAESLSKSVDMQKMAAE<br/>NVLDVQEIFQKPVSHIEECHADDAGKSVFESKQTGIEGVMADGATAV<br/>EREPATPDDGCEDDDSDEAEENSDDQNESSIAPMEKTEQEALYMVI<br/>QGFVQQRWNGSDLYPDCGWTQIQGVSCDLFDGLWYVTALSIGPILE<br/>NSLECTEKSEFTNLGQLRNLRSVLVDNSLVGELPMELGNLIQLKRLML<br/>SGNRFSGQIPASLCINLNQLLIDLGGNSLTGSLPSSLCGLSSLLKLDINSN<br/>RLHGSLPPGLGNLSHLALLDLRNNLSLGSVPSKSLAGMESLQVLLLSYNP</p> |

|         |                   |                                                   |                                                                                                                                                                                                                                                                                                                                                                                                                                                                                                                                                                                                                                                                                                                                                                                                                                                                                                                                                                                                                                                                                                                                                                                                                                                                                                                                                                                                                                      |
|---------|-------------------|---------------------------------------------------|--------------------------------------------------------------------------------------------------------------------------------------------------------------------------------------------------------------------------------------------------------------------------------------------------------------------------------------------------------------------------------------------------------------------------------------------------------------------------------------------------------------------------------------------------------------------------------------------------------------------------------------------------------------------------------------------------------------------------------------------------------------------------------------------------------------------------------------------------------------------------------------------------------------------------------------------------------------------------------------------------------------------------------------------------------------------------------------------------------------------------------------------------------------------------------------------------------------------------------------------------------------------------------------------------------------------------------------------------------------------------------------------------------------------------------------|
|         |                   |                                                   | WGGSLLEFEWKNLNRNLTTLDLSHMGLEG TIPETIASLKRRLRYLALDNNH<br>LSGIVSSKFAALPSLTALYLNNGNLTGELEFPERFYRRMGKRFASWNNP<br>NLCCNAAMATGSAPHGVAQCKQDQEPSANGSNANERVDDRNP<br>QNSGLSTSFLFPASSISGFWWGIVVQEIRTWVLPLEL                                                                                                                                                                                                                                                                                                                                                                                                                                                                                                                                                                                                                                                                                                                                                                                                                                                                                                                                                                                                                                                                                                                                                                                                                                     |
| Mac1III | Musa<br>acuminata | Phytozome<br>12<br>GSMUA_Ach<br>r11T13580_0<br>01 | MVLIKGRFESNRTGASFPTTRRPDRRRIACIKGDGVDKRYWIVGSP<br>WDREALPFVLFVFLKFLDEELGFLMFTPQRKGWSPSPRYGDGVDNR<br>MTTPAVNTRTGSVAVFLKGGKSAVEALPPPPPLQALLGENSIGVVD<br>QGDAEVWRSFREAGLLDESSLQRKDRDALVQRRISELEKELHEYQYNM<br>GLLLIEKKDWASKYEEIRQALAEVDETLKKEKSACLASISEFAKREENLQK<br>ALGVEQQCVSDLEKALREMRSELAEVKFTSDKKLDDAHAEIGLEEKYL<br>EVEQKLHAADAKLAEASRKSDDVDRKLEDVEAREHKLQKEYLLFDSGRK<br>LHEKDITEQREHLRDWEQKLQDSQKRLVETQRYLNEREDRTNEADRVL<br>KKKEADAEEARKMIEATKSLKTKEEITKRLGSLAAKEKEVDVKVESLE<br>NKEKDLISREEKLNARERVEIQKLLDDHNLISSKKEEFELDLEKRRKSLK<br>EIECKIREVEKKREIDSMEEQITKREQALQMNQKLMDEKEDVDLKS<br>DLKKWEESVQNDKLEKERQQLASDSEEFKSKSDLESKAAIESRKE<br>QIMKEEENLRLTKGEREEHLLQSNLKQESDCRILKESLLRDTEDLQQQ<br>REKFEWEEVLEDEKRLALEAERKKFNDEREKFEKWRHDEEERLNNEAL<br>VARANFERELEELNQKTEAFGEIMEHERLEALEVLKRRERADMARELELC<br>KHELEMDMQKRQEDTEKLLDKENDFQRKRDLDFNQMISLSSSNDLK<br>IQKLMMEEDRLEREKEDLSSYRKRLEIDRLEIQKDIDALRMLSRNLKEQR<br>EEFMKEKERFLAQAEQKTCCKNCGLLVGDLDTFCIQDAGDVQLPNLGF<br>EHLNDTNAETTNAKVSPAASGGRMSWLQKCSRLFNLSGKVKLDSSQ<br>HPLDNSNLYSSLDREAFDGEASHKPAASYGVVSDSSDQRAQSVTGIGD<br>NVESKRLCGVVEEPEPSFEVANNISIHIMRTQTQMDNGVRDQVVDQLA<br>MPSVSLNDREKYAPAGSDNLRVSKQRQSQPGRRGRPKAVKRTHTIK<br>AVVKDAKAILEQSSDEKNHGPNGEAKDPRRVAQTSVGTNSDPDAED<br>SEAHSESISLGGHRKRRQILASAVPVEKRYNFRSTIAATTTAAQTMSD<br>QTKGFKAGYDRQLTGNEILKEIGGEGSSRPVAVPVSDVVNSIIASNMLQ<br>KTAAVGIAEVREISSQKIVQAESNDDTVKSVEVSYQSGEDGHILDDAAT<br>GSRPATPSDDEDEDEEECEQQNASVGRKLWTFFTT |
| Mac1IV  | Musa<br>acuminata | Phytozome<br>12<br>GSMUA_Ach<br>r3T28980_0<br>01  | MLAPQKKGFLSPRAVAARRNGPAQSSFGNWWGGVVPGTRKGREVVA<br>GNAIPQPEELPLCGDGEDREKEQSEAQVWRRFREAGFLDEAVLQRRD<br>REALVRRRISELEKELYQYQYHMGLLLIEKKEWAVKYDKLRQEMSEAAQL<br>QKCMQAAHIVAVAEFEKSEGNLRRAMGFQRQSIIHLEKALNDMHAEI<br>AEVKLDSQKKLSEAHTLEATIEEKCLEIKEKQHS LDARLAKVSRKSSEVDR<br>RLEDVEAREHELKQTSFFIAEKKAFKDLRQRENLRRAWEQQLQDNQ<br>KKLGKWHSTENQREMETNERDNTFRKKEKELEEARKTLEISNELIKKE<br>EDMCMRIGALDAKEKEALLKQEFLEKKENELLAIEEQLNKNERVEIQKIT<br>DFHNSILESQKDEFELETEKRAVDEQLQGRIEEVAHKEIILENREREL<br>KKEQLLEREIGNLKNREKENDIMLSAVKVSINEKEEMRQGRGKLEKE<br>WELLGERRLSLEEGKQLFDEKERFDQWRCTEERLRKENPEVSIHAQ<br>MDLEDSISDEEAFKDKTTHQKMDVLEVFNSENAHVVYEIMQRIPEKVK<br>ETLLEKEDNSNRRSNIVLNCKILSSLDENILKLEQEDQLKSEKQLLV<br>GKKSEAGQSTSGTLRNNKDQVVEPAEEDYLPASAEQLKACRYCGFE<br>DGGDTALSGGSVEVSDQGTCPGSKLEARIPCMQRCSRLNLFSPGKKA<br>TEHSEKSVCLDGEPLHEDNLEPGPLPGDVNAFQWAQSAGGVQYNA<br>EPERSNDDDATKRDSQIADRSADILIFELNDRVRDLEPTLHVSDEQK<br>YREGCSIRPELNSLLWPLKQKQSGRSVRRKSILVKKSRVNALVEDANLE<br>EASQIKHSEQSTCRAQCLIKDKCLEEKYSLNDDEVTVCSSKRCLDLKYG<br>MMSLEGECAEAHTEDVSSLGCCFQMENIPGTEIPGLKRYNLRHSTIVR                                                                                                                                                                                                                                                                                                                                                                |

|      |                    |                                                  |                                                                                                                                                                                                                                                                                                                                                                                                                                                                                                                                                                                                                                                                                                                                                                                                                                                                                                                                                                                                                                                                                                                                                                                                                                                                     |
|------|--------------------|--------------------------------------------------|---------------------------------------------------------------------------------------------------------------------------------------------------------------------------------------------------------------------------------------------------------------------------------------------------------------------------------------------------------------------------------------------------------------------------------------------------------------------------------------------------------------------------------------------------------------------------------------------------------------------------------------------------------------------------------------------------------------------------------------------------------------------------------------------------------------------------------------------------------------------------------------------------------------------------------------------------------------------------------------------------------------------------------------------------------------------------------------------------------------------------------------------------------------------------------------------------------------------------------------------------------------------|
|      |                    |                                                  | AVAASQALACRTKQKRKGELELSLENKVLKVARRDGEGAESHASSETL<br>RSDIRNS                                                                                                                                                                                                                                                                                                                                                                                                                                                                                                                                                                                                                                                                                                                                                                                                                                                                                                                                                                                                                                                                                                                                                                                                         |
| Mac2 | Musa<br>acuminata  | Phytozome<br>12<br>GSMUA_Ach<br>r6T31730_00<br>1 | MTSPRPGGTPASRAVNASKTPATGGTPLGDDAIWKRLKESGLDEESVK<br>RRDKAALISYITKLESEIYEQHHMGLLILERKELVSKYEQVKASSDSAEIA<br>YKREEAKRSSALAEARKRELNLEKLLGIQKECVANIEKALHDNLVESAER<br>KLGYESKIAEAHAMMTAAQEKLEAEKLLAAESLQAEANRTRNTAIR<br>TLDDVEAREDELRRRLATFKSQCDAKENEISIQRQALYESQKTLHQQQE<br>RFLEGQTLNQRREYIFERTKELNRIEKELEESKANIEEESRTLKLERNSLD<br>LEIAALRNREEVIVKRESMLDKRERELLIQEKIACREHDEIQRIMEEHQS<br>ILEKKKSELEADIEQRHLLKNELEAKKIACEIREADLCSREISLQEKEHAIE<br>LQSSVLAKKQEDVANKLRLLEDKEHNLSTKREAEIEVQNMQKEREIFL<br>KMKVDLEKTKAVLEDEKKEIILAEKFEITLGERNELLLLLENKLEIDSRLR<br>AQKLALVAEADILKAEKEKFEIEWEMIDEKREDLQKEAERIDEERKTLAQ<br>YLKNEHDSIKLEKENLHNQFKRDVERLSCEREFFICEMDRQHSDWFTK<br>MQQERENFTKDIGIQRNELENSINERREEIETYLREKEESEFKDKVKELQ<br>LINSQKDMIKQLEHVASEMQKLNTERLEIAQDREQREREWADIKRFT<br>EALDLQCEKQKQRELLHAEREEINQKIQQLKLEELQIESENRLSVM<br>QTDKCDASVGKSCQCINGADRHIATPNGVSTMKLLPQGTNPSTPTS<br>VTKSWIKKCTEAMFKHSPEKSDTGHEENVESKMLAKSRDFRFSEMD<br>LQGHGNFAEGKEVSVQEMDNFTPKRRTKSNRQEKVNGQEIKVCRCNF<br>DEQNMISDARPVAKSAQSPSEVGANSIKFNQALEDSGQKSRTLFSINS<br>WISRRKRSNDMLSHDHADMDSEPNPKQQRPRQNGNSDVEGDSSN<br>GLAEQQPNIDDECEPVLNRNQTSGCEQLHAVAFKDDQHENMVVPAE<br>PIESSQHKLAVSNFDIVENGNFCKFEHSPLAGVGAATSSDANEISMKDK<br>QVFDKEHIARKPSQETSVSASDLIVEDNDKLEQDRYNEVLDELEDEDD<br>GSGLSVKEKIWNFLIT |
| MacV | Musa<br>acuminata  | Phytozome<br>12<br>GSMUA_Ach<br>r9T21820_00<br>1 | MCLHYVFLYTYCIYFSGHICRHPFFISYCFIYILLVNCFSWNTYPILYQYQ<br>YHMGLLIEKESAAKYKLLWQEMSEAVQIQKHMQAAHNVAVSEFEK<br>KEEDMRRAMRFQRQYSIYFISVLSIYFIFVQLEKALNEMHAEVAEAKL<br>ESQKKLFELHALEATVEEKYLEAKGKLHSLNARLAEVSRSSEIDRRLOD<br>VEAQKTHLRRILHNKERVCKLGNRSCRIVRRSLPGGIAT                                                                                                                                                                                                                                                                                                                                                                                                                                                                                                                                                                                                                                                                                                                                                                                                                                                                                                                                                                                                            |
| Mdo1 | Malus<br>domestica | Phytozome<br>12<br>MDP000031<br>2257             | MGNFVFTYKTIEPPTLLSIKPAAGNSSETLLLSVQLYENEGQIGSFNMKF<br>RAGPEIKKEXTFLMFTPQRWSGWSRTPRTGAEKTGTGSGAPNSNSGD<br>GIVAKGKGVNLFEPATPVSGSMLNVGKMLVESGGAATDREVLHRV<br>XELENELFEYQYNMGLLIEKKEWTSKYEEVRQSLNEAKEAVRREQSAH<br>LIAMTEIEKREENLRKALGVEKQCVHDLEKALHEIRSENAEIKFTAESKLA<br>EANALVASVEEKSLELEAKMXAADAKLAEVNRKSEIERKLDLESRESA<br>IRRDRLSFCSEQEAHETSLSKRREDLLEWERKLOEGEERLAKGQRILNQ<br>REERANEIDKSFQKQEKDLEDAQRKIDATNETLKRKEDDISNRLANLTK<br>EKARIFYEYDGLRMNLEMKEKELLVWEENLNAKEKVEIQKLIDEHNAXL<br>DAKKCFELEIDERKSLDDELNRRAVDVEKKESEINHLEEKIAREQAL<br>EKKAEKLRKENDFETKVKSLKEKEKSVKSEEKNLESEKKQLVNDKEDLV<br>RLLAEVEKIRADNEEQKQKISEQRDLLKVTTEERSDYLRLOSELKQKQIDKY<br>RQQKELLKAEADLQKQKELFEREWEELDDKRVEIEKELKNVGEQKEEI<br>EKWKHAEERLKNERVAQAQFIEXEQGDLKLARESFAAHMEHEKSELA<br>EKAQSERSQMLHEFETRKRRELETDMQNRLEDMEKPLRERXXKFAEEQ<br>ERELDNVNYLREVARREMEIEKVERLKIEMERQADANKEHLERQQVEI<br>RKDIDGLLGLSRKLRDQREQFIKERESFISFIEKLSCTNCGEMILEFVQLR<br>PLAEIENAEVIPQPRLSDDYLKGGNLNENLAASKRQKNEMSPAAEPRSPV<br>SGGTISWLRKCTTKIFSLSPGKKIEFGAPQNSPNEASFPGEQNEEPSERV<br>HGTENEAEISLGVASDSFDVQRIQSDNSIREVEVVQYPSHDEHSNMNS                                                                                                                                                                          |

|        |                 |                                   |                                                                                                                                                                                                                                                                                                                                                                                                                                                                                                                                                                                                                                                                                                                                                                                                                                                                                                                                                                                                                                                                                                                                                                                                                                                                                                          |
|--------|-----------------|-----------------------------------|----------------------------------------------------------------------------------------------------------------------------------------------------------------------------------------------------------------------------------------------------------------------------------------------------------------------------------------------------------------------------------------------------------------------------------------------------------------------------------------------------------------------------------------------------------------------------------------------------------------------------------------------------------------------------------------------------------------------------------------------------------------------------------------------------------------------------------------------------------------------------------------------------------------------------------------------------------------------------------------------------------------------------------------------------------------------------------------------------------------------------------------------------------------------------------------------------------------------------------------------------------------------------------------------------------|
|        |                 |                                   | EAPPDVPEDSQPSDLKGSRRKPSRSRRPAVTRARTKKAVVKDAKAILGE<br>ADSEYANGTAEDSVDMQSESLGGSSLADKRTTRNGRKRGRAETSQIAL<br>SDGGDSERLSDIVMGSQRKKRERVLPAEQVPGESRYNLRRPKTGVRG<br>AAATASRDLVKENEEVDGAIGTEAVIHYSKAAPATSMGVASENGGSSH<br>FVRCETLANTQDGDADAVKNQEENPVASEEVNGSTAGGQEYVEGDE<br>YRSESREATPIEEDDDDEESSEHPGQASIGKKLWTFLLT                                                                                                                                                                                                                                                                                                                                                                                                                                                                                                                                                                                                                                                                                                                                                                                                                                                                                                                                                                                                |
| Mdo2I  | Malus domestica | Phytozome 12<br>MDP000032<br>2171 | MAS PQSEPFGRTPSSXRALSITPGSRILQSPGSVSDETIWKRLKEAGFDE<br>ESIKRRDKAALITYIAKLEAEIFDHQHMHMGLLILERKELASNYDQIKASAE<br>TAXLLHKCDQAAHLSALADARKREECLKKTGVGKEECIASIEKAMHEL<br>AESAEKVAADCKLAE AQNMVEEAQKKFTDAEVK LHA AESLQAEACR<br>FHHAERKMQEVEAREDDLRRNILAFKXCETKEKEISLERQSLSERQKS<br>LQQEQDRLLDAQALLNQREDFIFGRSQELNRLEKELEDVKTKEKERRA<br>LNDGKLNLDL TEASLINREEALTRREALLNKKEQEILALQEKLVSKESDVI<br>KKAIASHEADLRKKKSELETELDIRKKSFEDEIEAKRRRAWELREVDLSQR<br>DDLREHEHELEVQLRALVDREKEVTGMSNLVGGKKEKTLREAEKEFEM<br>NSGILQREKEEIIKMKLELQSSLSLEEKRKQLDCARERFELLKSETSELS<br>LEMKLKEEIDL VRAQKLELMAEADLAIEKAKFESEWELIDEKREELRKE<br>VERVSEERLAXSKFIKDEHDNLRREKDEMRDQHKRDVESLVSEREDFM<br>SKMVHERTEWF SKMQKERADFLLEIEIRKGELENCIDKKHEELECSLKEK<br>EIAFEQEKKNEVQNISSLKEEAXKEREQVALERKKLESERIEINLDRRRD<br>XEWAE LNNSIEELKVQREKLKEQRELLHADRGEILXHIQHLKELEHLKAA<br>LDSASVADMQQSNL GPRSRKTSRRYLKQTTSVRD TXVNSHNEVNAA<br>NISIPSM LKTGLSPSSARF SWLRRCTELFSKNSSEKXQLEFEESHEISRGKT<br>NLTVTEQVETSSKYDGHRYMGNGSSPAFSSKRQSAFGGPKVXVEVPFV<br>GDXANGTKDSEI KEVDGESCDPVVSEQVFKGGRKRRVDKSSSNGCFDP<br>VLEPRQNVKRRRQQQDAIEKVLEDQHVSVP CDQFREGAEEGSLIVDK<br>VTKVTEVIFEE SVTGTLSNEDKFEAQNSVVEPHHVKN DIFGFFNDSYKY<br>AVKSMHKLWDLMECADISQKILLEGIVSFNF SVIVIPDPXSPIKNNMDP<br>LRVCFTTNRGTVKVR LQTETKVQPRRRGLTELLALEVFRESMR FAPDSG<br>EQAVAGR WVSNPVNQIY |
| Mdo2II | Malus domestica | Phytozome 12<br>MDP000025<br>3645 | MAS PQSELFARTPSSGRALSITPGSRILQGGAVGDEAIWKRFKEVGF<br>EESIKRRDKAALITYIAKLEAEIFDHQHMHMGLLILERKELASNYEQIKASA<br>KTAELLHKRDKAADLSALADASKREECLKKTGVGKEECIASIEKTMHEQ<br>RAESAETKVAADSKLAEARKVVEDAEKKFTDAEGKLHAAESLQAEACR<br>FHRIAERKMREVEAREDDLRRNILSFKTDCETKEKEISLERQSLNERQKS<br>LQQEQDRLLDAQALLNQREDFIFGRSQELNQLEKELEDVKANIEKERRA<br>LDDEKLNLELTGASLINREEALTRREVL LNKKEQEILALQEKLVSKESDVIK<br>KAIASHEADLRKKKSEFETELDVKLKSFEDKIEAKRRRAWELREVDLNQRE<br>DLLHEREHDLEVQLRALMDREKEVAEMS NLVGEKENNLREAEKEFEQ<br>NGGMLQIEKEEIIKMKLELQSRSLDSLXEKRKQLDCARERFELLKSETSELS<br>DLEMKLKEEIDL VRAQKLELMAEADKLSIEKAKFESEWELIDEKREELRKE<br>EAERVAERLAFSKFIKDEHDNLRREKDEMRDRHHRDVESLVSEREDF<br>MSK MVHERTEWF SKMQKERADFLLEIEIRKGELENCIDKKHEELECSLKE<br>EKEIAFEQEKKNEVEIISFLKEESAKERDQVALERKRLESERIEINVDRKRX<br>DCEWAE LCNSIEELRVQREKLKEQRELLHADREEILGLIQHLKELQHLKA<br>ALDSAPVAEMQQSDLVPHSRKTSRRSLKQTSSVRDADVN LHNEVNAD<br>NISNQSM LKTGLSPSSARF SWLRRWRELMFKNSPEKHQLEFEESPVIS<br>LEKTS LTVTEQVETSSKYDGH RNMGNNGNSPAFSSKRQCAFGE PKVIVE<br>VPFVGDLSNGTKDSESEI KEFDGESCGPIVSEQVFKGGRKRRVDKSSSA<br>GCFDPLLEPRQNVKRRRQQQDAVPNSSEHANSQCVASVPFHQIHEDA<br>EEGTVSIVDKVTKVTKVIFGETFTGLSSEDKSEAQNSVVEPDHVKNV                                                                                                                                 |

|        |                 |                                   |                                                                                                                                                                                                                                                                                                                                                                                                                                                                                                                                                                                                                                                                                                                                                                                                                                                                                                                                                                                                                                                                                                                                                                                                                                                                                                                                                            |
|--------|-----------------|-----------------------------------|------------------------------------------------------------------------------------------------------------------------------------------------------------------------------------------------------------------------------------------------------------------------------------------------------------------------------------------------------------------------------------------------------------------------------------------------------------------------------------------------------------------------------------------------------------------------------------------------------------------------------------------------------------------------------------------------------------------------------------------------------------------------------------------------------------------------------------------------------------------------------------------------------------------------------------------------------------------------------------------------------------------------------------------------------------------------------------------------------------------------------------------------------------------------------------------------------------------------------------------------------------------------------------------------------------------------------------------------------------|
|        |                 |                                   | LPGDTKAQEKMQESNLGDAGQFIDHCQCGDVSLMRIDSRVVV                                                                                                                                                                                                                                                                                                                                                                                                                                                                                                                                                                                                                                                                                                                                                                                                                                                                                                                                                                                                                                                                                                                                                                                                                                                                                                                 |
| Mdo3I  | Malus domestica | Phytozome 12<br>MDP000042<br>8602 | MMFTPQRKASTAALLLTPRSGGVVSNPRNTGKKGKAVLVDGPPPLG<br>SLSEXGPYTTAGLDTGDMDDWRAFKEAGFLDEASMERKDHQALAEK<br>VSKLQXELFDYQYNMGLLLIEKKEWASKNEELSQALAETQEILKREQSA<br>HLIAISEVEKREENLRRVLVAEKQCVAQLEKALREMHEEHAQIKRESEA<br>KMVDANSLVVGIEEKSLETDAKLCAA EAKLAEVNRKSSELEMRLEEVEA<br>RESVLRREKLSLSTEQEVHKTTFYKQREDLKEWERKQGEERLCKLRRI<br>LNEKEEKSQNMESMKQKEKXIEEGQRKIEALNTMLKEKEADVNRKL<br>DDLASKEKEANSLRNILELKERELHEFEXKLSRENVEIQEVLEKHRSXLN<br>MKMQEFELEMEERRESLNKELRIKVDGVEQKELEISHREEKLLKREQAL<br>HEKSERLNEKNKELETKLTKLENKTIKVDEKLEVERQQLLADIECLQ<br>NLRDEIQKIKDENLQLELHIREEREKQVITQEERSEHLRLQSELQQEIKTY<br>RLRNELLKAEADLKQREKFEFEWEDLDERKAEISRDLKKIVEEKEKLEK<br>LQGMEEERLKKKEDAMQNYLQRRERDSLKLEKESFASKMRNEQLALAE<br>KAQFEHSQMVQDFESQKRDLEADMQNKEQEMKKRLQEMERAFEEE<br>KDREHAKINYLKGVTDQREELRSERHRMEKEREELALNKKQQEVNQL<br>EMRKDIGQLAMLSKKIKQQREQLIEERRHFLSFVEKLSCKDCGEMTRE<br>FVLSDLQVPGMYQVEAVSLPRLNDELLKNSSADLGVPDLEYTESGWGT<br>SLLRKCKAMVSKVSPIKKMEYITDAGSSELPLSAIQVNVEEKRIESNMLI<br>NEGEGGHISHEDEPGPSFRMLNDSSAQPLPSDNTSKEVDDGYAPSIDD<br>HSFIDSKVKDVPDDSGQSEIKSGRQQPARGRKSRLSRTRTVKATVEEAK<br>KFLGNTPEEPSNASMLPNDSSYNIEEIQGASSFAEKANSSIGRKRRAQ<br>SSRITESEQDDCDSEGRSGSVTTAGGRRKRRQSIASSVQTPGEQRYNLR<br>HRKTAGSVTAAPXAADLKKRSKEETGGGGIEPIPESVSVSSLGTAGENG<br>QTTQLMQVTTLKGAEFSQERVVRFRTPTATVDDNAEADA AAKSVEND<br>MSVKDIGTPESGCGNNTNGESXDDYDDEDVEERPGEKSIGKKIWTFLT<br>T |
| Mdo3II | Malus domestica | Phytozome 12<br>MDP000020<br>8604 | MFTPQRKASTAALS LTPRSGGVVSNPRNTEKKGAVLVDGPPPLGS<br>LSESGPYTTVGFDSGDMDDWRAFKEAGLLDEAAMDRKDRQALAEKV<br>SKLQTELFYSYQYNMGLLXIEKKEWASKHEELTEALVETQEILNREKSAHL<br>IAVSEVEKREENLRRVLFAEKQCVAQLEKALLEMHEEHAQIRXEAEAK<br>MADASSFVVGIEEKSLETDAKLCAAYAKLGEVNRKSSELDMRLQEVEA<br>RESVLRREQFSLSAEQEAHKTTFYKQREELKEWERKLEEXEERLCKLXRT<br>LNEKEEKSQNDMIMKQREKDIEEAQRKIEALNTMLKEMEADVNRKL<br>DDLVSKEKEANSVRNVLXLKEKDLQEFQKLSLQENVEIQEVLDKHRAIL<br>NTEXQFELEMEERRETLNKLRSKVDGVEQKELEISHREEKLSKRKQAL<br>HEKSERLXEKNNELETKLTKLENEKAIKANEKMLEVEKQQLLADIECLQ<br>NLRDEIQKIKDENLQLELQIREEREKQVITQEERSEHLRLLSELQQELRTY<br>RLQNELLKEDLQKQREKFEFEWEELDERKAEISRDLKIVEEKENLE<br>KLQGMEEERLKKKHAMQDYIQSEQDSLKLEKESFVSKMRNEQLALAE<br>KAQFEHSQMVQDFESRNRDLEADMQNREQEMKKGLQEMERAFEEE<br>KDREHSNINYLKGVTDNEQMEELRSERHRMEREREELALNKKQQEVIQL<br>EMRKDIGQLDILSKGIKQQREQLIEERRHFLSCVEKLSCKDCGEMTREF<br>VLSDLQVSAVFQVEAVSLPRVNVDFLKNSPADSGVPELEYTESGWGTS<br>LLRKCKSIVSKVSPIKKLEHITDAGSSELPPVSTIQVNTEEKRNESNMLIN<br>EGARGHIGHEDEAGASFRMPNDSSAQPLPSDNTTKEVDDGCAPSIDD<br>HSFIDSKVKDVPDDSEQSELKSGRQKPARGRKSRLSRTRTVKATVEEAK<br>KFLGDTPEEPSNXSMLPNDSSYNHEXSRGDSSFEXEKANSSIGRKRMAHA<br>QTSRITESEQDNCDEGCSGSVATAGGRRKRRQPIASSVQTPGEQRYN<br>LRHRKTTGSVTAAPATADLKKRNKEETGGGGVEPIPESVSVSSLGTAGE<br>NGRTTQLMQVTTLKSVEFSQERVVRFRTPKETVDDNAEADA AAKSVEN                                                         |

|        |                      |                                          |                                                                                                                                                                                                                                                                                                                                                                                                                                                                                                                                                                                                                                                                                                                                                                                                                                                                                                                                                                                                                                                                                                                                                                                                                                                                                       |
|--------|----------------------|------------------------------------------|---------------------------------------------------------------------------------------------------------------------------------------------------------------------------------------------------------------------------------------------------------------------------------------------------------------------------------------------------------------------------------------------------------------------------------------------------------------------------------------------------------------------------------------------------------------------------------------------------------------------------------------------------------------------------------------------------------------------------------------------------------------------------------------------------------------------------------------------------------------------------------------------------------------------------------------------------------------------------------------------------------------------------------------------------------------------------------------------------------------------------------------------------------------------------------------------------------------------------------------------------------------------------------------|
|        |                      |                                          | TELSAEXNGTPESGGNNTNGESDDDDYDDEDVEERPGEKSIGKKIWTF<br>LTT                                                                                                                                                                                                                                                                                                                                                                                                                                                                                                                                                                                                                                                                                                                                                                                                                                                                                                                                                                                                                                                                                                                                                                                                                               |
| Mes1   | Manihot<br>esculenta | Phytozome<br>12<br>Manes.01G1<br>07600.1 | MMFTPQRKVVSSWSLTPRSEAQKSGAGSDPNTNVNGAKNLNSVDG<br>SLLKGKTVAFAEPVTPNGVGSALGVDVLEKISKLESELDYQYNMGLLLI<br>EKKEWNSKYEELRQAITETTDALKREQAAHLIAISDAERREEHLKALGV<br>EKQCVLDEKAVREMRAENAELKFTADSKLAEANALITSVEEKSLEIEAK<br>LRAADAKLAEVSRKSSEVDRKSQDMESRESALKRERLSFIAEREAHESAL<br>SRQREDLREWERKLQEGEERLSKAQRIINQREERANENDRIFLKEKDL<br>EEAQKKIDEANSILKSKEDDINSRLANLTLKEKFDATRKKLEMKEEELH<br>ALEEKLNDREKVEIQKLIDEHDAILDGKKREFELEAEERKSLDEDLKSKV<br>VEVEKKEVEIKHMEEKILKREQALDKRLDKIKEKEKDFESKSKTLKEREKII<br>RSEENLETERRQVNADREDFLNLKAELEKIRAANEEQLLKICEEKEQLK<br>VSEEEAEYVRLQSELKEEIEKCRREQEGLLLKEAEDLKQQKEKFEREWED<br>LDEKRAEIEKELKSISEQKEKFEKQVSEEEIKDEKKAVEDYVKREREAL<br>EMAKESFEANMEHERSVLAEKAQSEKKQMLYEFELQKSELENDLQKR<br>QEEMENLLRKKDKLFEEERELNINFLRDLARREMEEMKLERTKIEK<br>ERQEIEENKKHLQEQQLMREDIDKLDLSRKLKDHREQFIKEKERFILF<br>VEQHKSCNCGEITSEFVLSDIASKEIENAEVLPKQGLVNNNVIGDDN<br>QNLAAPARQEIDKSPTAVPSVPSVSWLRKCTSKIFNLSPGKKNEPGSLQ<br>SPTDVVENMEEPSKQLNSTVNERESSFAIGNDLLDQRQSDSSIREVEA<br>TQDLSVDNQSNVNSEALEIQEETQPSNLKRDSQPHKRRRPRVSRTRSV<br>KAVVQDAKAILGESLEVNETEDSSHLKAESRDESSLADKGTSRNARKRN<br>RARASQNTVSEHDVGESEGHSDSVTAGKRRRQKQVAPVQAPGEKR<br>YNLRRPKRGVTVVTDKALSGNNGKDKKEEGVRLTSTGMVSENGGGQ<br>HTAQLEKVSNDQDGDADTPRNLVDSAAALSEEVNGTPEAAGQYGVG<br>DEYRSESHIEDEEDDEEEPEHPGEVSGIKKLWTFFTT |
| Mes2I  | Manihot<br>esculenta | Phytozome<br>12<br>Manes.13G1<br>07600.1 | MASPVTPSNRALSITPGARVLKTPLSDGTIWKRLKEAGFDEESIRRRD<br>KAALIAYIAKLESEIYDLQHMGLLILEKKEFASIFEQIKASAEATELKHQ<br>DQAAHLSGLAEARKREESLKKALGVEKECIRSIEKALHEIRAESAETKVA<br>ADCKLADACSMVEDAQKRYTDTEAKLHAAEALQAEASQHHRAAERKL<br>QEVEAREDDLVRHISIFKADCDAKEKEIVLERQTLSEREVQLHEHERLL<br>DGQALLNQREDYVASKSQELSCIEKELEASKASIEKELRDLNDRKSNLEV<br>TVASLSQREEAVIEREALLNKREQDILALKEKLASKESSEIQQVIANHETIL<br>KTRKSEFEAEVEKNCKLVENQIEAKRRRAWELREVDLRQREDMLNEREH<br>DLEVQTRLLSDKEKDMADKINFLDEKERSLNAAERDSEMRRTLLQKEK<br>EEINKIKLELQESLNSLEDKQVDCAKEKLENMRSETNELSLLGMKLKE<br>EVDMVRAQKMELVAEEDRLKVEKAKFETEWELIDEKREEMRMEAERI<br>DEERQAVCRLLKDERDSLSLEKETIREQHHRDVESVNHHEREEFMKKME<br>YEHSEWFNKIQKEHSDFLLGIEMQKRELENSIEKRREEVESYLRGQEKA<br>FEIEKKNELQHISLREKAAKGLEEVALEIQKLDSEMEINLDRERRDKE<br>WTVLNKSIEELKDQQTQKLEKQRELLRAEREVCAQIEHLKMMEDVKIM<br>MDNMEVAKMQQSSMESSWQKISAIRYLNRHSSVKDSDLVSHERVDI<br>TNNGNGLDPSLQKSGVASSPDSARFSWIKRCTELIFKSSLEKPLLKSD<br>KSLILNNDYANLTSAGKLDSSNGYHEQKLSIESGKRQPMRYTFSEPN<br>VILEPPKDVIKKEELDEESEKDDANEIALSSEHVIHAGKRRNSLSTDP<br>HPDERQNNKRRNQHKGATVNLSDANNPCVTSTQINAPENHHSTEGE<br>AADDMVNADRIIKISEVTSEVTCDYCEVQDGGTDDH                                                                                                                                                           |
| Mes2II | Manihot<br>esculenta | Phytozome<br>12<br>Manes.12G1<br>18800.1 | MASPVSPNTVRALSITPGARILKTPLSDETIWKRLKEAGFDEDSIKRRDK<br>AALIAYIAKLESEIFDLQHMGLLILERKEFASKYEQIKASAEAAELKQKH<br>DQAVHLLALAEARKREESLKKSLGVEKECLKSIEKALHEMRAESAESKVA<br>ADCKLADARSMVEDAQNKYMDAEAKMRAAEALQAEANQHRRAAE                                                                                                                                                                                                                                                                                                                                                                                                                                                                                                                                                                                                                                                                                                                                                                                                                                                                                                                                                                                                                                                                        |

|      |                               |                                          |                                                                                                                                                                                                                                                                                                                                                                                                                                                                                                                                                                                                                                                                                                                                                                                                                                                                                                                                                                                                                                                                                                                                                                                                                                                                                                                         |
|------|-------------------------------|------------------------------------------|-------------------------------------------------------------------------------------------------------------------------------------------------------------------------------------------------------------------------------------------------------------------------------------------------------------------------------------------------------------------------------------------------------------------------------------------------------------------------------------------------------------------------------------------------------------------------------------------------------------------------------------------------------------------------------------------------------------------------------------------------------------------------------------------------------------------------------------------------------------------------------------------------------------------------------------------------------------------------------------------------------------------------------------------------------------------------------------------------------------------------------------------------------------------------------------------------------------------------------------------------------------------------------------------------------------------------|
|      |                               |                                          | RKLQVEAREDDLRRRINTFKADCDAKEKEIVLERQSLSERRKVLQQEH<br>ERLLDGQALLNQREEYVANKSQDLDRLEKELQASKTGIEKELRDLNDKK<br>SNLELTLASLSQREAAVIEREALISKREQQLLSQEKLASRESVEIQKVIAD<br>HETILKTRKSVFEAELEMNRKLVEDEIEAKRRRAWELRELDLRRREDMLN<br>EREHELEVKSRLAEEEEKDVAEKMNFLEDEKERGLNAAERDSELRSALL<br>QQEKEDINKIKLELQESLNSLEDKKNQVDCAKEKVETMKCETNELSVLV<br>MKLKEEVDMVRAQKLELMAEEDRLKVEKAKFETEWELIDEKREELRM<br>EAERIVEERQAVSRLKDERESLRLEKERIREQHTRDVESLNHEREEFMN<br>KMVVEHSEWFNKIQKEHSDFLGIEMQKRELENSIEKRREEIEDYLRDQ<br>EKAFAIEKKNELEHVSYLREKAAKELEQVALEMKKLESERTEINLDREQR<br>DKEWAVLNKYIEELKDQTQKLEKQRELLRTEREEICAQVEHLKKLEDLKL<br>MLDNMEVAKIQQSNMESSLQKISAVRHLRNHSSVKDAGLVSHEREDV<br>TNNGNRLDSPSMQKSVVDSSPNSARFSWIKRCTEMIFKSSPEKPLLRSE<br>EKSLISNDAFLASAGKLDSSNSYHGEKFNSESSGKRQSMIYAFGEPK<br>VISEPPEDEIAKKGCEKESETKKDANEDIDPSFSEQAIHAGRKRREKSSSL<br>YVTTDPQPEQRQNNKRRRQKGAAVNLSKDAKNPCVTSTKINATEED<br>KHSTEEGAEDDVEVIAERIIKISEVTSEVTCDYGDVHDGGRNGHSNQKG<br>VEHSAPCEFEVSVILKDQMGHVGHGTGQHQSDEDEDASKTSDLRVD<br>ISDVARSDNSEKFAEDVGRRTSRKQKL                                                                                                                                                                                                                                                                                                          |
| Mes3 | Manihot<br>esculenta          | Phytozome<br>12<br>Manes.06G0<br>74000.1 | MFTPQRRPSSAITLTPRSEVRKSGVANVASTSLKIGGKGEVAFMDGS<br>MPPPLPPPVGSLSGNGAELDTEDMEDWRRFREAGLLEDEVMERKDR<br>QALLEKASRLEKELFDYQYNMGLLLIEKKEWNLKYEELRQALAEAQEIILR<br>REQSANRIAFSEAEKREENLRKALSIEKQCVADEFKALRDLQEERRQIKH<br>ASESKLADAKALAVGMEEKSAEVEEKLRVAEAKLAEINRKNLELDVKLQ<br>ELEDRESVFQRECLSLNTEREAHEASRCKQREDLLEWERKLQKGEERLC<br>ELRRTLNHREEKANENKILEQKERDLEEAQKIDLSFALKEREDDVN<br>NRLSDLTAKKADSTRRIMERQENDLIALEVKLSAREKVEVQQLLDEH<br>QTALDAKMHEVELEEKRKELDHELSTAEVLGQREGEILHREEKLRK<br>REQALDKLERVKEKEKDLVVKLSFKDKEKSMKVEQKCLDFDQKLL<br>ADKQSLQVLKDDCEKIRSEIAQQELQIGEKSENKITNYERLEHLRMOA<br>ELKQELEKCRRHGEFLLKEGEDLKEERDKFEKEWEVLEGKRAQLSKELN<br>KITEEKEQFVKFQRNEEERLKEENATKEYIQRELEAVRLEKESFEVRKR<br>DEQVLLSKNTDMEHDQMMQDFESQRITFEADLIRREAMEKVLQER<br>QRLFDEQREREHKMDYLKEVAQKELKEIRSEKLIKIEKQEVAKNKKQ<br>LEGQQFGMQKDIDELVLSNKL RDQREQVIRDRNHFLAFVGGKHKSCK<br>NCVDITSEFILSDLLPPDMEDRMILPLRRQSDEILRNVEDD VDPVVMN<br>VNRSPGELDLGYSNSQERMSWFRKCTSKIFSISPTKKVEHCSVPILQEEK<br>TDDFGAFASKAARRSRVSGDESGQLDYDGIGKEDRYSVSVDHHSIM<br>DSKVEDSEQSELKSSRRKPGRRRKAGISRTRSVKAVVEDAKLFLEKSSEE<br>PECHAKDVRSDNIYHIVDESIEKPAGNIARKRERAPTESEQDAGDSEGG<br>SESVTTGARRRRQVVASAITPGQKRYNLRHRHTTGATSVNQASSGLT<br>KMRERETDGCESVETTTKPETANALPLGVASKTGKSTDALNVTTVKNV<br>ESTGDRAVRVNQADVAKSIEITELSEEVNVTTEYVDEDENGSTIHEEDE<br>EYDDDELEHPGEVSIGKKIWTFFTT |
| Mfi1 | Microstrobos_fi<br>tzgeraldii | onekp:BBDD<br>_scaffold_20<br>78409      | KFDQVKFALAETEENLKREQAAHLVAISEAEKREESFKKALGVEKQCVA<br>DLENALHEMRAEIAEAKFTADNKLAQAREMMATTEQKSLTAESKLHA<br>TEALQAEASRKHAEETERMQEIEAIESALQRDRQSFKSECDARDAQLSL<br>ERQNLLEWEKKLQEGHERLLEGQRLLNQREEYTNQRDEALKQIEKELD<br>DARKLIESDLASLKEKEADISVRLAALATREENAVKREIHDKKEQELLCLQ<br>EKLTSRENEEIQKVIDEHKAIFEARKNEFEAELEQTKIAVEQELEKRQNT<br>VASKEADIMRKEEKLKREQQFEKKSEKLKEKEKEVDSRLKALKEREKAL                                                                                                                                                                                                                                                                                                                                                                                                                                                                                                                                                                                                                                                                                                                                                                                                                                                                                                                                         |



|      |                                  |                                     |                                                                                                                                                                                                                                                                                                                                                                                                                                                                                                                                                                                                                                                                                                                                                                                                                                                                                                                                                                                                                                                                                                                                                              |
|------|----------------------------------|-------------------------------------|--------------------------------------------------------------------------------------------------------------------------------------------------------------------------------------------------------------------------------------------------------------------------------------------------------------------------------------------------------------------------------------------------------------------------------------------------------------------------------------------------------------------------------------------------------------------------------------------------------------------------------------------------------------------------------------------------------------------------------------------------------------------------------------------------------------------------------------------------------------------------------------------------------------------------------------------------------------------------------------------------------------------------------------------------------------------------------------------------------------------------------------------------------------|
|      |                                  |                                     | <p>KNEEKKVEVEKNQLETEREEINNEKEELQKTKIALEEEKHQVLNEQEHLK<br/> IIDKERNELLKLTQLKEEENYRAREQEVEKEAEELRLQRENFEKEWEF<br/> LDEKREQVMKESARVDEERKRISKWLLDEQERLKHDKSTLRERIQSETE<br/> TLRLEKEAFEASMQHERSEWLENIRNEQADLVRDIELQRSELENSIEKR<br/> REEIEKLSREKEISLQKDEREMQHINAQRELASKETEEMRLERHKLEKE<br/> RQELISREHADRWSEIKKDIEELQVQRDKLKEQRDSLHKEREVLRFLF<br/> EHLHLKKT DINVTDDVLNLTANKDGSNSQEALTQNI FGTPADGSLKFN<br/> PGTSSGRVFESGSGTPNRLSWLQRCASRFLKSPSPLKIVDSTDKKGETA<br/> VRPTVGTDAVGGESERGNREIVVGLIEPAFLADGEKYDLAVQNKNEM<br/> MHEHDVPKPLPSVYFDHSLPSSSNGNRRKPSDKS KIKVFKRTRSIAKAVV<br/> EDARGLLEVSSDKEMDEFKQGEHQNEAAFADNREKGESAGGEKAI<br/> SGQEIDGSNRESLATDKRPSKSGRKR RRRVQSSRATSEQDAEDSEIQSEP<br/> AVGGRRKKRQQAANGGNSGVGTPGAKRYNFRHSTIASSVATQVQS<br/> VDAKDNDNAPAEEDKSKNTHASPSDADVMNREVNREETS LNKSAMV<br/> PSGQESEKHSVVRTGDNDLGD AIEDLQEVSSHELTSKSETDVYPRSEED<br/> EGNGEYQYTEERDDEDDDFDDDDGNDEEEDNDPPSLRKKLWKFLT</p>                                                                                                                                                                                                                                                       |
| Mfi2 | Microstrobos_fi<br>tzgeraldii    | onekp:BBDD<br>_scaffold_20<br>10913 | <p>IEKQCVADLEKALHEIRAESA EIKFVSENKLAQACELVAATEENSLA AES<br/> KLHAGEALQAEANRKRADAERMLQVEAREDELRRQCEAHEKELYFE<br/> RQTLREWHMKLQEGQDRLLLEGQRLLNQREEYIMERSEAIKQIEKELQD<br/> VKQKLGKEQSTLKEKEADMKVN LADLTIREEALVKRETIIDKKEQELLLL<br/> QEKLATREEEIQRLTDEHQAVLEARTLEFEAELEQK CRAVDDELENKR<br/> NDADTREDEIKCKEEKLNKR GQQVEKKA EKLKEKQKELD AKLRALKERE<br/> KILKIDEKEIETQQKKLEAERHEMN NLKQVLEKLKSALEEEERHQIHIEQEK<br/> LELTENERNDMKIIQTKLKEEIDNLRAKERELS QKEDVLNVEKEKFEREW<br/> EILDEKTELLRKDSEQVDEEKRRVSRWLKDEEERLKQETRVLREHIKSDE<br/> EALRLKKEAFASSKRHEEAELLAKIERERADLYRDIELRTSELEKSFEQRQ<br/> EELEKHYQDRESAFQKEKQKEMQHIVAQKEMSDKELERIQRLERQLDR<br/> EWKETATTHEQTEQEWSEIKKDIEELQIQKDKLKEQRESLHNERQELEA<br/> QLDQLKKLKAELKMTEDSLKSEQQISQVNVNDCEVISAKQFDGCVSS<br/> QVAIRENVVSAIPCKTDEFRPEINLGGTPGSASDTPSPLGWLQKCASRL<br/> FKQSP</p>                                                                                                                                                                                                                                                                                                                                    |
| Mgl1 | Metasequoia_gl<br>yptostroboides | onekp:NRXL_<br>scaffold_206<br>6762 | <p>MMTPNRRGRWPGWSPTSRS SPAVDDKAVAVVEKSGHVTVGSGGSA<br/> GKATVEAPPRNSLDGNRF AVTAAAAAEPVWRRFRRESGLDHSLEK<br/> KDRAALLHINKLDAELYDYQY NMGLLIERKEWTSKYEQMKLALAEAE<br/> ESLKREQSAHLVAITEAEKREESL KKS LGVEKQCVSDLEKALHEMRSEVA<br/> EVKFISEKLAQAREMVASTE EKSLDAESKLHAAEALQAEASRKHAE TE<br/> RKLQEIEAIESALRRDRQSLKSECD AHEVEISLEKRNLLDWEKKLQDGQ<br/> DRLLEGQRLLNQREEYTNQRDEAFKQIEKELED AKKQIENDHSTLKEKE<br/> ADITVRLTALSTREENAVKREILIDKKEQELLVLQEK LASKENEIEQKLLDE<br/> HKAMLEARKIEFEAELEQKNKSVEEDLEKRRSTLELFEKDINSKEEKISKR<br/> EQQIEKKVEKLKEKEKEVDARSKTLKEREKILKNEEKEIMIEKKKLDGERE<br/> EINNEKQELQNVKVSLEEEKQ QIFNEQEKLVTEKERNELQKLTDLKE<br/> EIENYRAQKQEI EKEAEELRLEKERFEKEWFLDEKREQAKKELALVEEE<br/> KKRISKWLRDEEERLKQEK SALQERIQNETEALQLEKEAFAANMQHER<br/> AEWLESIRREQADLIRDSELHRS DLVNNIEKRQEEIEKLSQEKEIGFQREK<br/> ERETQHISAQRELVSKEMEEMK LERNRLEKERQEISTSRQHADMQWT<br/> EIKKDIVELQLQRDKLKEQRESLCKEREV LGLFEQLRKLKTELNISEDGL<br/> DLIANKGGICRTGDDYGF SLEVVPQKIFGTPASASAKGDPEPSSGRFTPS<br/> ASGTPGRLSWLQRCATRF FNQSPSPEK MIDSTGRKEETDRSPTVVPET<br/> TGAESERMTGEIVVGLIEIQPTISADDQNH DAGVETEVD AQEQGITKSS<br/> PAVKFDHSPSRSKNGSGSKSNDKSKVKVFKRTRSMKAVVEDARGIIDV</p> |

|      |                                          |                                    |                                                                                                                                                                                                                                                                                                                                                                                                                                                                                                                                                                                                                                                                                                                                                                                                                                                                                                                                                                                                                                                                                                                                                                                                                                                                                   |
|------|------------------------------------------|------------------------------------|-----------------------------------------------------------------------------------------------------------------------------------------------------------------------------------------------------------------------------------------------------------------------------------------------------------------------------------------------------------------------------------------------------------------------------------------------------------------------------------------------------------------------------------------------------------------------------------------------------------------------------------------------------------------------------------------------------------------------------------------------------------------------------------------------------------------------------------------------------------------------------------------------------------------------------------------------------------------------------------------------------------------------------------------------------------------------------------------------------------------------------------------------------------------------------------------------------------------------------------------------------------------------------------|
|      |                                          |                                    | PSDQEKNESESQRQEHLLQNQSAVDPNRRQDKDGRAGGDKTNSAQEIDD<br>SNRESLANDKRSSKSGRKRQRGHSSRVTSEQDADDSEIQSELVAGGRR<br>KRRQQGTANGGSSGLGTPGGKRYNFRHSTIASSVAT                                                                                                                                                                                                                                                                                                                                                                                                                                                                                                                                                                                                                                                                                                                                                                                                                                                                                                                                                                                                                                                                                                                                     |
| Mgl2 | Metasequoia_glyptostroboides             | onekp:NRXL_scaffold_2066709        | SPVNEENEMWRRLLKKVGLDDEEILQKKDKAALIAHITKLETEIYDYQYNM<br>GLILLERKELISKYEQLKLTAGAEAGNFKRDQAAHLAAIAEAEKREESLRK<br>ALGIEKQCVDLEKALHEMRAESAIEIKFVSENKLAKARELVASTEESLST<br>AESKLGAGEALQAEANRKRADAERLLQDVEAREDELRRQRQAFKSECE<br>AREKELFFERQNLREWEKNLQEGQERLLDGQRLLNQREEYVIERNEAT<br>KQIEKELQDVKRNIEKEQSALKEKEADLRGLADLTTRREEVLLKQVEIINK<br>KEQELLVLQEKLASREREIQRILTDEHQAALVSRKSVFEEELKQQRKAV<br>DDELENRRNAADIREIEIQCREEKISKREQQVEKKAELKEKDKELDARL<br>RNVKEREKHLHIKEKEIETHLKKLEIERDEMNISSKQVLEKSKAALEEEERKQ<br>ICKEQERLELTEKERDDLRSIQIKLKEEIDNFRQQEQELSKKDEVLNVEKE<br>KFEREWEILDEKTEQLRKELQKVNDEKKRVSKWVKDEEERLKQERRML<br>REQMKNEKEALRLEKESFANSKKQEEAELLANFQRRERADLCHEIELQKS<br>ELQNSFKEIKCLEEDYKERVREFEKKKEEQYIKAQKELSDKESQEMKL<br>ERQRDLREIQEKIVTTREHIDREWSKMKKDIEEMETRREKLKDLRESLH<br>REREEFEAQLDQLKLLKDELKMTEDSLKLEQPLQLAVLNDCEVISPGH<br>FDGGISQAQACTQSIAMPFNADNFCSEIHVTRPPASASDTPSPPLAWLQ<br>KCTSRIFKKSP                                                                                                                                                                                                                                                                                                                                                                              |
| Mgu1 | Mimulus guttatus/<br>Erythranthe guttata | Phytozome 12<br>Migut.H0053<br>3.1 | MFTPKKKLWSLTPSSEPGQKNGSVSGLNTNPISPRNGEASAKGKSVGF<br>LQSDGIMDQASLTERVAKLENELFEYQYNMGLLLIEKKEWTLSDYDELKQ<br>ALADATDTLKRQAGRSSVLSEAEKREENLKKALGVERQCVHDLEKALR<br>EIRSEYAEIKFNADSKLAEANALVTSVEEKSLEVEAKFHAADAKLAEISRK<br>SSEIERKLHELEAQENALRRERSIFNTEREAHDASISNQREDLREWERKL<br>QEAERLADGRLLNQREERANANDKILKEKQNDLEELRKKIEMGNSA<br>LKNKEEDVRSRLASITIKEKEDDDVRKKLEEKEKQLELEENLNTREKFEI<br>QKLLDEHNRIAEKQKFELEMEQKRKLNDEHLKDKVVELEKKEAEITH<br>MEEKIKKREQAIEKTEKVRKEMDFESKSKALKEKEKSLKIEEKNLEKER<br>KQMLAETEDLLTRKAELESIKIDIEKLQQLNEEREQLKVTEAERIEYARL<br>QSELKEEIDKYRFQSEQLMKEADGLKQEKFEKEWEELDDKRTEIKKE<br>QEDVLEQKIYLEKLRHSEEEKLRGEKLETEQYVQRELEALKLAKDSFAAS<br>MEHEKSIYAEKTQSEKSQLVHDFEMRKQELETEMRRKQEERESSLQER<br>EKSFEQEKEMELNNINYLREVAKREMEEMKLERLRMEKEKTEMSHNK<br>KHVEAQQHEMKKDIMELVDLSQKLKQREQFIKERERFIAFAEKQKNC<br>NICGETISEFMLSDDLTLTEMKNLEAPPLRVAENYLEGVEGTIAGFDAE<br>SSPARVNSGSPTAPGGTMSWLRKCTTKIFKFSPPGKLELDYTEDLAGSS<br>ALPEKRDVDSPKSLPGGEKEAEPSSQIANDSFDVQIVESDSAIRKVEDPV<br>NTQEYSQKSDLKARRRPGKGGRRPRTRTVKAVVTGSKTNGNAENSVY<br>TNDESQTESDLVGTTKDRRKRTRVHGSQATVSDSQTEGHSDSIKDGDR<br>PKRRQRVVAEEQSVGQRRYNLRQPKKSVGTTNGSLPQVRKGENESD<br>KLPVLEADQYENFVTEGASREEIDECGAAAPLKRFGGEEPVRSNNGA<br>SEFSADSPFKNAVGTREHVDDMVLSEEVNGTAAEGMEYSGEFEKTES<br>EVEEGDNNEDDEVEHPGQASIGKKFWNFLT |
| Mgu2 | Mimulus guttatus/<br>Erythranthe guttata | Phytozome 12<br>Migut.H0031<br>6.1 | MASSNYRSDKFALTPRSAATGLLSSPNSGSARVLKTPLSDEAIWKRKLE<br>AGFDEESIKRRDKSALIAYIAKVEAELEYHQHMGLLILERKEWLSKYEE<br>AQSMADSAELKFNRRERASHVSDLADAKKREDGLKKALGIEKECVKNIEK<br>TLHEMRAEYAEVKVAGESKFVEARSMVEDALKKLEAAEEKTRAAESLE<br>AEASRYHRTAERKLHEVEEREDDLRRRIMSSKADFEAKEKEIQLERQSL<br>ERQKVLQHTQETILDGQALLNSREEHIFNRNQELKRFKELEDLKISIDK<br>ERIALNEEKLVLKASSLSVREEAVIKRECDLFFKKEEQALLQAKVTSKES                                                                                                                                                                                                                                                                                                                                                                                                                                                                                                                                                                                                                                                                                                                                                                                                                                                                                                  |

|      |                                                |                                          |                                                                                                                                                                                                                                                                                                                                                                                                                                                                                                                                                                                                                                                                                                                                                                                                                                                                                                                                                                                                                                                                                                                                                                                                                                                                                                                                  |
|------|------------------------------------------------|------------------------------------------|----------------------------------------------------------------------------------------------------------------------------------------------------------------------------------------------------------------------------------------------------------------------------------------------------------------------------------------------------------------------------------------------------------------------------------------------------------------------------------------------------------------------------------------------------------------------------------------------------------------------------------------------------------------------------------------------------------------------------------------------------------------------------------------------------------------------------------------------------------------------------------------------------------------------------------------------------------------------------------------------------------------------------------------------------------------------------------------------------------------------------------------------------------------------------------------------------------------------------------------------------------------------------------------------------------------------------------|
|      |                                                |                                          | <p>DNAQRVISNHEAILAMKNSAFEAEAEMKRKSLEDELDAKRRDWELREL<br/> DIKQKEDLILERERDLNVESELLKEKTKEVEEASRFVKEKEKNLLAAEEEL<br/> EVKKKSLEQEKEEIHQKKLDLKKFSDLLEEKKKHISDAEEKMEEMKRETN<br/> ELLALELRLKEEIDIISAQKQELEAEAERLKAEKAQFEAEWELIDEKREELE<br/> KEAGRIAEEERSTVSKYLKEERESLKEEKNAMREQYKRDLQLLSRDRETF<br/> MTEFESERTEWFSRIQKEREDFLLDIETRKKELDDCMEKRREEVENYLR<br/> ERENEWEERKEKELQHMTSLKERVEKELEGLKSEMKILYSERTEKIILDR<br/> EKRAHECAELNMSIEELKVQREKLEKQRESLRADREEILSQIETLRKLEDL<br/> KDRLDSITVHEMHQANMRSNNLKS AKKIVNRENELVSDQNGNINNG<br/> FGHNAIGTVELDKLSSPLSAPFSWLKRCADTLLEQRQSNKKRRREKDV<br/> THGSENSTPSSTQKYSNASKIEHTVTQFNQTPDGGGETTVYIDKIITIQEV<br/> TTVDVERITGDNEEAEFQHKDEKLENGDVELEINGKL</p>                                                                                                                                                                                                                                                                                                                                                                                                                                                                                                                                                                                                                                                |
| Mgu3 | Mimulus<br>guttatus/<br>Erythranthe<br>guttata | Phytozome<br>12<br>Migut.L0110<br>7.1    | <p>MFTPKRQWPGAPMTPKTEVRATPNPSRKDKMVAFTDGTPTPPPPPTS<br/> FLSANGNTAQENMEDWRRFHEVGLLDEVELERRDREALVERTQRLE<br/> RELFDYQYNMGLLIEKKEWTSKHEELQESIQEVQELLKREKTAHLIAVS<br/> QVEERESNLRKALDAERQCVNELSRSLRDIGSEHEKIKMITSASKLANAN<br/> DLVAGIEDRSLEVQQKLLSADAKLTEANRKALELERKLOEVETRESVFKR<br/> ERMSFISEREAHEANFLKHKEDMREW ERKLOEGEERLCQNRNINERE<br/> EKVNELSRMLKERERELEDEQKADLANLTLKEKEDEINKKLAELIVEED<br/> KAKSVRSNLEMKEKQLTALTEKSSREKVELQNLLEHRSALDIKKQFEF<br/> LEIEERRKSLEEEIKIKHENLVKKESEINHMEEKLRKQDQALEKKS DRVNE<br/> KEKDIELKLGKLEKEKALKLEKNLDLLRRETASDKESLQILKDELEKMK<br/> AEISQKLEIHDEKESV TNEERKEHNRLMNLKQEIERYKHEKDLLSK<br/> ESDDLKQDRKNFEEWEALDEKRAELTRDAQQLEEEKTEIEKLKSSLEK<br/> QLKEDKIVTEDYVKRELEALKLEKESFAATMEHEQSMLSEKSRHEHDQL<br/> VRDYEIRKRDLEADMLNKQEEMERSLQERERAFEEKTEKELSNISRLKE<br/> VLQKETEDMKAERSRLEKDKQSITLNKTQLEEQQLEMHKDINELGVLS<br/> KKLKLQRQQFIKERSRFFSVETLKDCENCGRAREYILSDLQITDKEEAS<br/> PLQALGEELEKVSSYKSNAKKDALSEEDPKLSESGGRMSWILRKCTPRI<br/> FNPSPTKKVQEMPPQNL DQALDTLVNVAENVGVS NMPDNHEVPE<br/> DSQNSGLKNRRRKSSRFKGGVHRTRS VKDVEDAEVFLRRKSGDVELN<br/> EEQSKDEESRGESGLVGKAASAVRRKRTRAQSSKMTESVDADYDSEG<br/> HSESVTAGRRKRHQTAAPAVQNSGQTRYNLRRHTAKSKGVAISTDS<br/> ERIPDKEVGYATVSRDNEITSAPPEEVT SQKRSSAQLVQVTSR KQAQM<br/> VSVERVRFQAGENLDENADAAKLTETVDLSEEVSGTPEYNTGDEENE<br/> DEEGDEYAPGEASIPKKLWTFFTS</p> |
| Mpo  | Marchantia<br>polymorpha                       | Phytozome<br>12<br>Mapoly0160<br>s0011.1 | <p>MFTPQKRAQPSWALQSSGEKANRRDKGKVISPDGRVGGSTPNSTTET<br/> LRTVVVERSVMMSMDVAPPVASLDGRGPDGVQSEPEIWRRFQEA<br/> GALDVESLEKKDRVALLAKVSTLEAELYDYQYQMGLLLMERKNWNIKS<br/> EEFKAAILEAEENTQREQAANLIAREEAERREQILKKSLEIEKRVIDLEK<br/> ALKEMRAEAAEVKESADKQVHAREMVY GIDEKLQTADAKLYEAQAI<br/> RAEASRRHAESERKVQEA EAREDALRRERQGLYAEVEARKQELDKEEQ<br/> SLKDW EKRLQEGRDRIHEGERLLNKREQSINQRDEEVKRLEKKQLDIKS<br/> DLERDRLLLQIMEGDLNSRLAIITEREETALEREVSIDKKEQDALLTQQR<br/> L AGRLVDLEEREQHLKSMEVNINNERERLEILEGTLKREESLVEERDDL<br/> V NLRLTIDEQKRELVALKEEVESAKATLEKERMKLEADREDFESKDLVEQ<br/> RLL EIDQKLESIAQREVQDHRSTMLSEREENLEQMFQGI AVKERIVKE<br/> EESAVEAERRRLAEEKEDLERAKEEIEDIKAQLALERQQVQDLKDKLKKD<br/> HEAEMHELAEERNALRMGEEQGRKRLQEEKEVLQQQIEDEKRQITAE<br/> KERLKVIEEEREELLVQKQLKEEIDEFRARKLRVSNELEELKTEKERFERE<br/> WELLDERREELKKEKEKYDEESRTMTEWLRTEERLKAEKQEIHVQFLT</p>                                                                                                                                                                                                                                                                                                                                                                                                                                                                          |

|      |                     |                                     |                                                                                                                                                                                                                                                                                                                                                                                                                                                                                                                                                                                                                                                                                                                                                                                                                                                                                                                                                                                                                                                                                                                                                                                                                                                                                                                                                                |
|------|---------------------|-------------------------------------|----------------------------------------------------------------------------------------------------------------------------------------------------------------------------------------------------------------------------------------------------------------------------------------------------------------------------------------------------------------------------------------------------------------------------------------------------------------------------------------------------------------------------------------------------------------------------------------------------------------------------------------------------------------------------------------------------------------------------------------------------------------------------------------------------------------------------------------------------------------------------------------------------------------------------------------------------------------------------------------------------------------------------------------------------------------------------------------------------------------------------------------------------------------------------------------------------------------------------------------------------------------------------------------------------------------------------------------------------------------|
|      |                     |                                     | <p>NSELSAEREAFIKRMERERVELFSRVEKEKEDIMRSVDLQRTELEERSVE<br/> KEREQFNKLAERELRFLKDLEREKEKIKEANEALLRESELIGLERQKLEKE<br/> RHEILTQRDNAEKWSEIRKDDIDLHIQREKLKEQREALHNEREEILQEK<br/> DTVQKEANRLRKMKEYELKEGESSLRFSDQQQSQRREGQMGQDAEVL<br/> PPQQGQSVVRDSGKELTPKTPPGGTSTGAEVTPSRKLITSPSAGLGW<br/> LKAFLRSAEKTAGPSTAEGQAVAQGQRSQSRDVRQRLQPSRSFNQ<br/> SQIAQAVGVDAVGSVKKRVKRAKRTGPMQVVTEARQGNQADWT<br/> GSQMEDREAEMSEADGGRNQEALVPEEGSKGKDAEVNDIAQTSEP<br/> RGAKGGRKRRRQPVKETSQNYLENNEESDSDTAGATRRKRRFKDIEVL<br/> SGYNGDSGLDTPTSQANTPGGGRRYNLRRSTLINTKATQAASAQSEER<br/> ELSAQQERSQRKKAPPASIPASGDLPEVSSPPPSQREVRPMTTITLSTL<br/> VIEETIVKTEVTNGIVEGNELENGSPEEGVGLERASDEPVQEQHEGS<br/> QDGAVQEQQEDPQEEAVQDLQHDLQEVIGELLAGYEFQGSAGV<br/> QLDARNGDGEEHDGDDGDGDEGVLEEEVVEVEEELEEDGVEADVEE<br/> VEEGGEEVEVEEGEDEEEVELEEDEEMEEVDEVEPEEEQSESQEEAET<br/> PKPTIGQRVWDFLIT</p>                                                                                                                                                                                                                                                                                                                                                                                                                                                                                                             |
| Mtr1 | Medicago truncatula | Phytozome 12<br>Medtr7g018<br>610.1 | <p>MFTPQRLWSGRNNTPNKRGSGHDLGVISGEGSKGKGVENGGNLDRE<br/> VLVERVSNLEKELYEQFNMGLLLIEKKEWNSNYNELSQDIVEVKDALE<br/> QEKAHLFALSEAEKREENLRKALGVEKECVLDLEKALREMRSEHAKIK<br/> FAADSKLAEANALIASVEEKSLVEAKLRSADAKLAEISRKSSIDRKS<br/> SHDLESQESALRRERLSFIAEQESHSTLSKQREDLREWEKLLQDGEERLAKG<br/> QRILNEREQRANDIDKICRQKEKDLQEAQKNIDAANVTLSKEDDVNSR<br/> LATITLNEKECDSMRMNLDFKEKELSAWEEKLNAREKVEIQKLVDDHS<br/> AALDAKKQFEFIELEEKRSFEDGLRDRLVEVEKKEGEVSHMEEKVAKR<br/> EQALEKRAEKLEKEKEHEVVKALKEREKSLKSEEKDLGKEKQIESER<br/> EELLSLKSEVEKLRANNEEELLRIKEETNRLQVTEERSEYIRLQSQLKHEI<br/> DQYRQQKELLMKEADDLRQQKETFEREWDELDKRADVEKELKNVLQ<br/> QKEEILKLQQNEEERLKKKEQATEDYLQRELETLQLAKESFAAMELEKS<br/> SLAEKAQNEKNQLLLDFEMRRKELEADMQNQLEQKEKDLFESRRLFEE<br/> KRESELNNINFLREVANRGMEEMKHQRSKLEREKQDADENRKHVERQ<br/> RIEMQEDIDLVDLNLKLLKSQREQFIVERRRFIDVVEKLQSCQNCGEMI<br/> SEFVLSDLQSSADIENLEVPSLPLKLVGDITQGGSDVNLDSRQNTGASP<br/> ATDTKSPVPGGTVSWLRKCTSKIFKISPIKKIESVDNLRSDVTLPFDKTN<br/> EDLPANVPGTENEAELSFAIADDSFDVPRVQSGNDITDTEVEADHEPSI<br/> DKQGNIDATATDYLQPPNSKAGQKPRRGGGVRARVKRTQTVKAVIK<br/> EAEAFLGESKAAEAVPGESVDDRETFPNGIAEDSANMDSSESQKPEK<br/> RTANLRKRNRISQSSQVTASGHEDDPSEGHSDIPGRPKRRRQKAAAPPA<br/> QSAGETRYNLRPKTGATTSSVRDVSAGGKESEGEVGRAKDAGVNIHS<br/> KPSHSHSVGITNENEDSIDIDQSQKAAETHDDYDDTTTNNRALSEEVN<br/> GTADDVEDHDTEYRSESRGEDAGRVDDEEIDEDYQHPGETSVGK<br/> KLWKFFTT</p> |
| Mtr2 | Medicago truncatula | Phytozome 12<br>Medtr4g097<br>580.1 | <p>MEISTPSSAKPLSITPSSRVLRSPLSDEQIWKRLREAGFDEESIKHKDKAA<br/> LVAYIAKLEAEIYDHQHMHMGLLILERKELVSKYEQVKTMVESSELVHNR<br/> DLSTNKSALAESRKREESLKKTIGVKDACIGSLEKALHEMRTECAETKVA<br/> AESKLAEAHQLTDEAEKFFTEAEAKVRAAESLQADANRYKVAERKLR<br/> DVEAREDILRRQIISFKSDCDEKDKEMNLERQSLSERQKVLQEQERLL<br/> QSQSSLNQREDHLFSRSQELDRLQKELEDTKFKVEKEHEALHDKKTSLQ<br/> LLEATLTQREEALTKSKTELNKKQEELLEFEVKLSNRESDETHKAIADREA<br/> TMRAKKHDLEVELQMQRKSVENEIETKRRAWELKEVDLQKQREDQILER<br/> EHELEVISRSLSEKEKDLAEQSTALKDKDQSLKASEKEFELNTLLQKEKD<br/> DIEQAKKDLQVSLASLENEKRQVDNAKQRLEVIQSETGDLISIFEVLLKEE</p>                                                                                                                                                                                                                                                                                                                                                                                                                                                                                                                                                                                                                                                                                                                                                                                  |

|      |                        |                                                                  |                                                                                                                                                                                                                                                                                                                                                                                                                                                                                                                                                                                                                                                                                                                                                                                                                                                                                                                                                                                                                                                                                                                                                                                                                                                                                                                            |
|------|------------------------|------------------------------------------------------------------|----------------------------------------------------------------------------------------------------------------------------------------------------------------------------------------------------------------------------------------------------------------------------------------------------------------------------------------------------------------------------------------------------------------------------------------------------------------------------------------------------------------------------------------------------------------------------------------------------------------------------------------------------------------------------------------------------------------------------------------------------------------------------------------------------------------------------------------------------------------------------------------------------------------------------------------------------------------------------------------------------------------------------------------------------------------------------------------------------------------------------------------------------------------------------------------------------------------------------------------------------------------------------------------------------------------------------|
|      |                        |                                                                  | IDLVRSQNLELLAQADKKAEEKAFEVWELLDEKKEELRKEAEFIENER<br>KAVSTFVKNERDKLREEKENLRKQYTHDLGLLASERENFMKKMAHEH<br>AEWFGKMQQERADFRDIEMQKRELNLIKRREEVESYKERETTFE<br>EEKNRELQHIDALKEKAKELEQVSLEMKRLQTERTEINLDRDLRNKEW<br>AELTNCIKELEVQRDKLQKQRELLHADRINIYSKTEELKKLEDSKVVSDDL<br>AIVEMLKSDMEYNQQKISSRKNLKHQTLTQGVRLSSCKDVDVDNIDN<br>GFDTPFVQKSSGVSPASAAARFSWIKRCTELIFRNSPDTLTKKGNLAVAS<br>DTNNGSNGQKHLENDNPLGNFSNGRQMGYSFGEPKVIVEVPSLVGN<br>ASRTSELKSVTKDVNGKPAFSEELQVGRGKRGRENLIKVADPLVDLAQ<br>NKKPRAERMAKNPLDQATTYCVHSTQSDISEIQVSGASNHHKGNNT<br>EEARVVMVDKVIHVSEVTSEKVDTLIIPNQDNLHRETNDQSNKTRSEE<br>ILPCGSSVLENTEGIRQENTEPVSDYC                                                                                                                                                                                                                                                                                                                                                                                                                                                                                                                                                                                                                                                                                                         |
| Mtr3 | Medicago<br>truncatula | Phytozome<br>12<br>Medtr6g015<br>285.1                           | MFTPQRKSRPIGTPAPFTPHRIGVTPKSALAKGKAVVFADEPLPPPPLG<br>SLTDTGGDVVVAASYAEDWKKFREVGLLDEAVMKRKDDEAMMEKIS<br>RLEKELYDYQYNMGLLLIEKQEWSSKFNRLRQELAETQEVLRDQSLHL<br>IALSEVQKREENSRLKALSLEKQCGADLERALHAMQEELAEVQSSSHTKL<br>DKANELVDGIEEKASTVNKKLHDAEARLAEVNRKNTELDMKLELEVR<br>ESLLQKERLSVATDRESFESVFKQREDLKEWERKLRQREDMLSDGRQ<br>NLGEKEQNVTETEKLLKQKERDLEVSEKNIDSSNLLKEKEAEMSRRVA<br>DVDAEEKKVDSAKKMLEIKELELQELKLSARESEGIQKLLDEQKKTLD<br>LKLQQFELEMEQKRKSLAEFSSKEEALEYREIEVNHRETQVKGKEEQALS<br>TKSERIKEHDKELLTKMKSLKEEKTMIKERELEKEKEKLLADRRSLENL<br>NDELEKIKAEISQKQLQISQETENLKLQDERSEHSRLQLELQKQIEHTRM<br>QKDLIMKEAENLREERLRFKEWEELDCKKRAEINGEQQVEKEKEKLRK<br>LKNSEERLKREKQDMEDNLKKELEKLELDKKSFSDSIKQEEFLLSEKVK<br>NEKAQMVQDFEWKTRNLENEIQKRKEEMEKDLQQRERKFQEMEKE<br>LNNINILKDAAEKEWEEVKSEGIRLENERKELETNKQQLKSDQREMHE<br>DSEMLMNSQKVKKERERLVAERNHFLALVEKLRNCKDCGEVVRDVV<br>VSDLQLPDSKECGVLPPTSLENLSDNVIASGNSHSGSKWVPSVFRKC<br>TSKIFSLSPSTNTDSIGTSNIAGTSPESDVNVNIEKVGEPVSSPNIEGPIVA<br>LQERQIADGVAFHSSDTAHLQSDNIAREGNTYSLSIDEHSYMSLTGG<br>GPDDSQQSVPKVGRQRPGRKSKSGIARTRSVKAVVKEAREFLGKTSSQ<br>NLDTDYIKENSHESSHTEKATGNSTRKRQRAQTSKIAEGEQNAADSE<br>GHSDSSTAGGRKKRSTVAPPTTQVTGEKRYNLRHKTAGTVSSTQEL<br>SNKTKALEKEASGGKQEAGDNPEVAVVADDNIQTTLVQISTVKSVEI<br>KDDRVRFEIPRDNVDDNGATTNSVDRIEESGTLEYGDEGDSIVNDVE<br>NEDEGEEDEDEEEEDPGEVSIKGFKFFTT |
| Nhy  | Nitella hyalina        | (Koreny and<br>Field, 2016)<br>HO490484,H<br>O531334,H<br>566387 | LFLMEKRSLAETS KSDNTVEGYEEIIRRRREEW SIMDFELETQLKDTYL<br>KEQRDVEEVIKDXXXXXXXXXXXXXXXXXETKENLLRREREQVRILGADM<br>ETKRQELTERENIAREWEAKLATREQGVKTEERMKAREDTVLRKRD<br>TEGLARLEGKRKGLSEMEDDLRLREKDLSTKEEGLXXXLNMKDEELRS<br>AKERLLESEHDVKMERERLKEAMLARRQEIIDQQKQQLSSRENAV<br>ERELSSASAAHNMKLDREDIERKERDLRILREEIEEQALLNDSRRKHSS<br>GKRVELRERNXXXXXXXXXXXXXXXXXXXXXXXXXXXXXXXXXXXXXXXXX<br>LRQHAAESENRRSTVRTTVEEARKRKRGHSELSRTDLQRGESVAVA<br>GSAELEEQGNADRRVDGVSSAGRSGTPPSGTDASPSRRRTRSMQDVI<br>NKGNEIWGASLVQGDEMEAQAVKGAGKxSYIPKRRRKGQAMVDAX<br>DADEDTTTTDDDTGKDDTEVARKIDRSVKYNLRKSTVYHQAARFSEQN<br>RDAQAYEGCVLTRQVAGTSDRLVPPSPVMGRKLDLSVGLKQASW<br>RQPSERELT                                                                                                                                                                                                                                                                                                                                                                                                                                                                                                                                                                                                                                                                        |
| Nlo1 | Nothotsuga_lon         | onekp:AREG                                                       | MLTPKRRGWPGWSPKTPSPPPPTAEDMAGSSHVATPAAAAGGSSG                                                                                                                                                                                                                                                                                                                                                                                                                                                                                                                                                                                                                                                                                                                                                                                                                                                                                                                                                                                                                                                                                                                                                                                                                                                                              |

|      |                                       |                                                 |                                                                                                                                                                                                                                                                                                                                                                                                                                                                                                                                                                                                                                                                                                                                                                                                                                                                                                                                                                                                                                                                                                                                                                                                                                                                                                                                                          |
|------|---------------------------------------|-------------------------------------------------|----------------------------------------------------------------------------------------------------------------------------------------------------------------------------------------------------------------------------------------------------------------------------------------------------------------------------------------------------------------------------------------------------------------------------------------------------------------------------------------------------------------------------------------------------------------------------------------------------------------------------------------------------------------------------------------------------------------------------------------------------------------------------------------------------------------------------------------------------------------------------------------------------------------------------------------------------------------------------------------------------------------------------------------------------------------------------------------------------------------------------------------------------------------------------------------------------------------------------------------------------------------------------------------------------------------------------------------------------------|
|      | <i>gibracteata</i>                    | _scaffold_20<br>12690                           | GRALVEAPPRNLLDNGEIVATRGQPEIWRRRFREAGSLDEESLEKKDR<br>AALVVHVTKLEAELYDYQYNMGLLLIERKEWTSKYEQMKVAIAEAEEN<br>LKREQSAHLIAISEAEKREESLKKALGVEKQCVIDLENALHEMRAEMAE<br>LKFTSEDKLAQAREIASSTEEKALAAESKLHAAEALQAEVSRKHAEMER<br>KGQDIEALERALQRRERQSFMSEHEACESDLSLERQNLAWEKKLQEGQ<br>ERLIEGQRLNQRREYINKRDEAMKQIEKELEDAMQIEKDHALKEKE<br>ADISARMAALATREEDVVKGETVINKKEEELHALQEKLVIMENEEIQKLI<br>DDHKATLEARKIEFEAEIEQKKILVEEELGKKRSDIELMEDNVNRKEEKV<br>SKREQQLEKKAKEVKEKEKEVDARSKALKEREKTYKNEEKQIEMEKKL<br>EAEREDINNEKQELQNLQVVLKEEKQQILNAQENLVTEKERTELLKQ<br>TELKEEIEDYRARKQQVENEAEELKLEREKFEKEWEILDEKREQVRKESA<br>QVDEDKKRISKWVLDEEERLKQEKRALREHIQSDSDALHLEKEAFKNS<br>MEHERAEWFENVRERADLLRDIELQRSELESSIEKREEEIERLLHEKEV<br>EFQKEKEREMQHIFEQREIARKEMEEMRVERRRKLEKERQENTKSREHA<br>EKEWSEIKKDIQELQVQREKLKEQRESLCKEREVLSLFEQLKKLKTEN<br>VTEDHMKQIADKDGSHFLRPEDAFGLFQQGPGQNIFGTPVDTSMKV<br>NPEPSSGRDASTSKTSRLSWLQRCASKIFNQSPSPGKVDSTVWKEE<br>TERSHTPALEVDLGAEIEKMTYENTVGENVEHMSSADVQNDGCTVEA<br>AEDNRQGHGKLSKSVNFDSSLPSVGNHGHKSKDKAKVKVFRRTS<br>MKAVVEEAKGILDTPSDMEKNESEDRQEQEQNDAAVTANSEDPGKE<br>ADTDKDTAKEIDESKGESLASDKKPSQSGKKRRRKYSSRATSQAQDAED<br>AEIQSELTSGQRRKKRQRDSANGDNSVVGAPGGKRYNFRRSTIASTIA<br>AQTVSLEEKEKDLTTQEEEEDSRRVQENPPERVAEDNQEASSDEPARV<br>PSIGEKDMNTPPAEDQQPQSFQENGLGDAGDDLQEVSSHGLTKSETG<br>EFYAESEDEGGNGQDIEEIVETEDDVEEAEEFDEDENNDGDDQKTSLR<br>KKLWNFLT |
| Nlo2 | <i>Nothotsuga_lon<br/>gibracteata</i> | onekp:AREG<br>_scaffold_20<br>12479             | SPVNESEMWRRLREVGLDEQTLQKKDKAFLVAYITKLESELYDYQCNM<br>GLLLIERKEWTSKYEQMTLSASEAEDKAKRDRAAHSVAIAEAEKREETL<br>KKGLGVEKEKALHEMRAECAELKFISDNKLAQAREMVATTEEKSLAAE<br>SKLHAGEALQAEANRQADAERKLQEVAREDALRRERQAFKSECESR<br>EKELILERQNLRGWDKKLQEGQERLLEGQKFLNQREAYTLERDEALKQI<br>EKDLQGLKMNVEKEHSTLKEKEAGLRASLAALMTREEVVVKQEITVDK<br>KEQELLVLQEKLASREREIQRILTDEHKATLEAIRIEFEAELEQKRKIVEDE<br>LENKENATDLRGLAISRKEEKLSKREHHLEKKAELKEKENELDARSRTLK<br>EREKTYKTEEKEMENEKKKLEVERKEINSTKQELEKFKASLEEERCYIVKE<br>QQKLELTKNERDELDDLQTKLKEEIDDLRAQKQELLKEADELNVEKEKFE<br>REWEILDEKREQLRKELEWVDDERKKVPKWVKDEEERLKQEKIVLREEI<br>KRDAEGLRLEKEAFENSMQHQRVLFQVQRRERADLLRDIELRSNELD<br>NSIERRREELEKHYREREFQKEKEKETQYISAQRELLRKEIEEIKSERQR<br>LERERKEIATNQHQTEKEWSEMKKDIEELQIQREKLKEQRQSLQKERQ<br>ELQAQLVELKKIKDELKMTESLKISEQQLSQVNINDCEVISPGHGISQV<br>ALRENILAVPQANANIEFNSGISPERTSASASTPSPLAWLQKASRLFKQS<br>PEK                                                                                                                                                                                                                                                                                                                                                                                                                                                                      |
| Nmi  | <i>Nitella mirabilis</i>              | (Koreny and<br>Field, 2016)<br>NCBI<br>JV767595 | MKSAKKASSMNGSASPKNPNPDNNMISAGSFEIRKMTTTTTRTLRESA<br>SCEKKKKTVEVEEKNAGHNFGGAFSREALALDLSGLPSDLKPIELGGA<br>WRRFQDSGALSEQGLEKKERNFMVDHIKQLEDELYKSQYHMGLLLME<br>RKSLADVAKLDHTAKEEYEEIIREREWSMTRIEYEEIETTLLKENLLAEQ<br>QCVKEVEKAIRDVQKEKDETRLAELRFSEARALMSEVEKKEHGVEISR<br>KNVEATRAEFTRKVEIESRARELETKESLVRREREQVRIESSELEMKRQ<br>ELIERENVAREWEAKLASREQSVRKMEDRMKGREDTVLRKERDVEEG<br>MARLDGKRKGLSEMEDDLRLREKDLAMKEESLVRREVNQVQEQEAQ                                                                                                                                                                                                                                                                                                                                                                                                                                                                                                                                                                                                                                                                                                                                                                                                                                                                                                                              |

|       |                     |                   |                                                                                                                                                                                                                                                                                                                                                                                                                                                                                                                                                                                                                                                                                                                                                                                                                                                                                                                                                                                                                                                                                                                                                                                                                                                                                                                                                                                                                                                     |
|-------|---------------------|-------------------|-----------------------------------------------------------------------------------------------------------------------------------------------------------------------------------------------------------------------------------------------------------------------------------------------------------------------------------------------------------------------------------------------------------------------------------------------------------------------------------------------------------------------------------------------------------------------------------------------------------------------------------------------------------------------------------------------------------------------------------------------------------------------------------------------------------------------------------------------------------------------------------------------------------------------------------------------------------------------------------------------------------------------------------------------------------------------------------------------------------------------------------------------------------------------------------------------------------------------------------------------------------------------------------------------------------------------------------------------------------------------------------------------------------------------------------------------------|
|       |                     |                   | <p>QEIEERLSMKDEEMRSAKERLLESEHDVKLERERLKELEATLTRRQDIIE<br/> QQKQQMSSKENALMERELSSASAVHNIKLEREDLERKDRDLRLLREEIE<br/> EQKALLNDSRRDAQQWEAKLEMREERSIEAKEESLRERQQDVELRGKG<br/> VLDKERELKMDRRRIEAISSKIEEEREVRLDMELAKKDREALANEREEV<br/> RKEIEDCRRLKVEADNVRADALAKRAEVKKEREDLARDREDFMRKRED<br/> MRKERDAVSKDREELKREKELLEQKRDQVIRESENVDAEREEVERERE<br/> LDKEREVVKQLREENSKELEGLMMLKDDLNEKDRSLKIESRRVEIELRTV<br/> KEDRDAVRRESEELRKDKKEKVQQLKIEVKNEKTELDIWKEEIIETERERM<br/> EREKHEVRRDRELLIRQEEVHVKLKIEIEESQRTFKMDKKKFFELDHRAK<br/> EERDDIKKEREELARERDLVDIERESLKKERDEVERDRLELELERERLEAK<br/> SELFKEKEEETEREMVKKDMESLSRQESRYSEVLQKETELSLEKRRV<br/> KEGLEENRVTRRETLIREKEEFSREKEDAAKQRAENQREKEDLERDREEL<br/> DRDRIELTVKRDELKRARELHLRQEEELAKTMEDMLAKERMLKSERRKL<br/> ESASAKLKEEREEVSGEANEVKREREEVLRERESVRKEKDELLQDREDLE<br/> RGKEDVRRERDEMRRERDVRRRERIQLLREEETLSMDRDELMRERAN<br/> TAKLELELTIQVEELKRQREELELVKERLCDQKAALSQNMELTKQGEEY<br/> RRKMDDLGRVEDTMRRRREAMIVEADA AVNHSGSLVATLLANVAHV<br/> EDGATAVLALPQALTASGEDALHGARSREERSLQERVSEGGREETDKIS<br/> WRSETRVSSKLREGRSYFLRQHAAESENRRSSVRAQAIEDEERRKRKR<br/> GHSELSRTDLQKGESLVAVRSEEADQANTDRRVDVSSAGRSRGTTPPSG<br/> ADASPSRRRTRSMQDVINKGKEMWMTSTIGDEV DITIGSKGVGKLN<br/> SVQGKRRRKVRAMVDADEDTTTEDDVGKEDSEVARKTEGKVKNLRK<br/> TTVYHQATRVIESRDEQPSAGGAEMALQVAVTSAGLIPPSPAMGWKL<br/> TRSLGLKQQVPRRRPSEGEHTSSRDTSQETVALGARKSGGEEDASRGR<br/> SREEEEEEEEEENNEDEGQDEEENEAEKDEGADAEDEEVVERGRENS<br/> WLEWLLPVPWNV</p>             |
| Nnu1l | Nelumbo<br>nucifera | KEGG<br>104601026 | <p>MFSPQRKVVWSGWSPTPSDAQKNGGASVSNPRNGGGGDDGVSVAKGK<br/> NVAFLEGPSPPLGSLGENGRSAVVRLESGTDKEDWQRFKEAGLLDEAL<br/> LEKKDRLAFVEKVSLENELFEYQYNMGLLLIEKKEWTSKCEETROALLE<br/> AQEIIKREQVAHLIALSEVEKREENLKKALGVEKQCVADLEKALREMHA<br/> EYAEIKFTSDTKLSEANALVANIEDKSLEVEAKLRAAEAKGAEANRKISEI<br/> ERKLQEV DARECVLRERLSLNAEREVQETALSQREDLREWEQKLQE<br/> GEERLCEGRRILNQREEKANEDRILKQREKDLEDAEKKIEITNVTLKKKE<br/> DDINVILANLAVKEEEADTVKKNLEMKEKELLMLEEKLIAREKMEIQKLL<br/> DEHNSILEKKKHFELELEQKRRSLDEELKNKVVALEQKEVEINHKEEKL<br/> GKREQALEKRLEKSKEKEKDLESKLKALKERESL KAGEKDLEMekkQM<br/> LSDRENQISKA EVEKIRADIEEQQLKICEEREKLVTE DERADHVQQQS<br/> QLKQEMDKYRFEKELFLKEVEDLKQEREHFEREWVLD EKRTKVMEEL<br/> KEMNEERERLEKLTSEEKLNERLAIQDSIQRKEEALKLEKESFAASM<br/> EHERLVISERARSEHDKMLRDFELQKREFEADFHNRQDKMEKHLQERE<br/> REFEEKREREQNNIDFLTEVARREMEELKLERLRIEKENEVAANKRHLE<br/> GYQIEMRKDIDELGICSRKLDQREQFMKERERFLAFVEKHKNCNSCG<br/> ELTSEFVLSDLWTLAEIDDAEALPLRLATDYLKESIQSGSASAERTKIEV<br/> SPGGSVLASPPGGRMSWLKCTSRIFNLSPIKRNEQVAGQGLHMESPF<br/> LVPEVNVKETS KRLVTEDEPEPEPSFVVP SDFSDAQIQT DNSIRDLO<br/> AEPTLSVGEQSNMDNMAQEFPEDSQQSELKSGKRKYVKKHKPAQRT<br/> HSVKAVEDAKTILGENREEDKNAQPNGNAQPNGNTEDISNLNEESQG<br/> DYGVASMGRKRNHAHVSVTTVSEQDANDSEVHSDSVTTGRRRKRQ<br/> IVAPAMQKPGEKRYNLRHRRAAGRAVSAAQETS NLTKGTVTDGGDA<br/> TSEEASKPEASITPPQVSENGQNAHVVPVTTRESIVEVHEFSADGVVRQ<br/> FEAATDGDNADVAKSNENVEFSDEVNGITEGATEYGYEEEEYASEVGED<br/> EGEVEDEDGDESEHPGEVSIGKKLWKFFTT</p> |

|        |                     |                   |                                                                                                                                                                                                                                                                                                                                                                                                                                                                                                                                                                                                                                                                                                                                                                                                                                                                                                                                                                                                                                                                                                                                                                                                                                                                                                                                                                                 |
|--------|---------------------|-------------------|---------------------------------------------------------------------------------------------------------------------------------------------------------------------------------------------------------------------------------------------------------------------------------------------------------------------------------------------------------------------------------------------------------------------------------------------------------------------------------------------------------------------------------------------------------------------------------------------------------------------------------------------------------------------------------------------------------------------------------------------------------------------------------------------------------------------------------------------------------------------------------------------------------------------------------------------------------------------------------------------------------------------------------------------------------------------------------------------------------------------------------------------------------------------------------------------------------------------------------------------------------------------------------------------------------------------------------------------------------------------------------|
| Nnu1II | Nelumbo<br>nucifera | KEGG<br>104603075 | MFTPQRKVVSGWSLTPRSDVRKNGGASVPNPRNGGGDGSVAKGK<br>SVAFLEGPPPLGSLADNGGNNVTVLDDGGDMDDWRRFSEAGLLDE<br>ASLEKKDRLALVEKVSKELELFYQYNMGLLLIEKKEWTSKNEELRQAL<br>IEAQEILKREQAHLIAISEVEKREENLRKALGVEKQCVDLEKALREMR<br>GEYAEIKFTSDTKLAEASALVVNIEEKSLEVEAKLHAADANLAEARRKSS<br>EVERKLQVEAREESILRRERLSLNAEREAQETTLKQREDLREWERKLQE<br>GEERLGEGRILNQREERANENDRLKQREKHLEEVEKKIDMMNITLKE<br>KEDDINTRLANLIAKEEEADLTKRSLDMKEKELLVLEEKLNARERMEIQQ<br>ILDEHNNILEKKKHEFELELEQKRKSLDEELKSRVVEVDQREVEVNHKEE<br>KIAKREQAVEKKLEKSKEKEKDLESKSKALKEREKVLKAEKSLEIQKKQ<br>MLSERENLVILKAEVEKIKADIDEQQTRICKEREKLVTEDEAEYIRLQS<br>ELKRENDKCRLEKELFLKEVEDLRQEKEHFEREWEVLDEKRTEIMKELKK<br>VSEEKERLEKLTSEEERLKNERIA MQDSVKRKEEALKLEKESFTACMEH<br>EQSVLSEKARSEHDQMLHDFELLKRELEADIHNRQEE MEKHLQERERE<br>FGEERSREQNKIDHLREVARREMEEMELERRRIKKEKEEVATNKRHLEV<br>QQLEMRKDIDDLVTL SKKLK DQREQFLREREHFLAFVEKNKDCMNCG<br>EIISEFVFDLQSLQELDGAEVLPLPRLAENYLESMQGGGTSADGANTE<br>FSPGGTCLGSPGGRMSWLKCTSRIFNFSPIKKTEQVAAQGLGTESLPT<br>EVNIEEESKRLVGAEDEPEPSFVVP SDFSVDVQRIQLDNSIRELQDEPTL<br>SVEQSNMDSKTEELPEDSQHSELKSGRRKYAKRRRPMRRTRSVKAVVE<br>DAKVILGETPEENKNEQNGNREGFVDIVEESRGDSGMSMGRKRNH<br>AHASITTVSEQDADDSEVRSDSVTTGGRRRRTQVAPAMQTPGEKRY<br>NLRPKVVGKAVAAVQATSDPTKGMKKAADGGEVTGEEASKQEAAI<br>ADSQGVNGENGQSTRLVQVTALESVVEIHEISADRAVRQFETVTGGG<br>NAEAMMLIGNAELSEVNGTTEGPVEYGD E EYASEGDEGDGFGDEDE<br>DDDDDESEHPGEVSIGKKLWNFFTT |
| Nnu2   | Nelumbo<br>nucifera | KEGG<br>104591220 | MVSPQQLGITLSSSKAGSPASRVLEASTPVQRNNGSPLGDETIWRR<br>LREAGFDEESIKRRDKAALIAYIAKLEAEIFDYQHMGILLERKDWTSK<br>YETIKETVESLEILRKRQQA AHSSALAEAAKREESLKKALGVEKECIANIEK<br>ALHEMRMESAETKVA AESKMAEARS MV EAAQKKFADA EVKLHEAES<br>LQAEARRYHHAERKLQVEAREDELRRRLVSFKSDCEAKEKEINLERQ<br>AVHEGQKILQQGQERLLDGGQTLNQR E DYIFGRVQELNQLKELEASK<br>EMIEKQSVSLNEEKS NLDLKVVALSTREEAVIQREMLLAKKEQELLVLQE<br>KIASKEHDEIQR LNAEHESVLEK R KSEFEAELEVKRK LLEEEMENKRRAY<br>ELREVDLNHREELLQEKEQDLEALS RALLEKERETKEKLK LLEEKEKSLIAS<br>EKEADLEKIHLQKERE E INNMKLDINKSMDALENKRKR VHEEEELAA<br>MKTEREELLVLEMKLT EEIVSIRTEKLQ LVAESDQLKAEKAKFETEWELI<br>DEKREELQREAERVAERKTVL KFLKDERDSLKLEKDVLRDQLKHDAES<br>LSHEREAFISKMEHEHSEWFSKIQQERADFM LDIE MQKKELDRCIDKR<br>REEIESYLREKEEAFEQEKTELQRISFLQE K IAKEMENVALEMKRLDAE<br>RIEINMDRRDRRENEWAELRNSIEELQIQREKLKRQRELLRADREEIDAQI<br>EHLKLEDLKIVSENVLSEM QGDLKPGRAKGA AKKLPNLEKALKDSNL<br>DSHPYEGTAHDGLHLD SKQGGASPPSSTPFSWIKRCAELIFKHSPEK<br>LIKYGERLEFESANVNLSESKDSQNSRKCESV LLENVGN TSGTFERQRC<br>NENDGAVKAF TETQPEKSVFE E PKIILEVPATENLEDRHSLDLEPEPKSD<br>ATEKSVYSSEKGLLAGRKR LKNTSN NNHADVQSEQSLSNKKKRQRKN<br>VSETPKESVNNCMVSTQQYSPGDGPDFE IAGDAEETSSFVDKNCKIP<br>EGIIENKVSHNYIEHAKLTCSLNKSVNLDDVQGRGTGYANSPQVGN AV<br>SSRRSKVQK                                                                                                                                 |
| Osa1   | Oryza sativa        | Phytozome<br>12   | MFTPQKGKGTGWSTPAPANQRSGGGAPAASAPLGKKGKGTTLRVAE<br>LEQELHEYQYNMGLLLIEKKEWTAKLDEINQALTQKEEILKREQAHLN                                                                                                                                                                                                                                                                                                                                                                                                                                                                                                                                                                                                                                                                                                                                                                                                                                                                                                                                                                                                                                                                                                                                                                                                                                                                              |





|      |                                  |                                       |                                                                                                                                                                                                                                                                                                                                                                                                                                                                                                                                                                                                                                                                                                                                                                                                                                                                                                                                                                                                                                                                                                                                                                                                                                                                                                                                                |
|------|----------------------------------|---------------------------------------|------------------------------------------------------------------------------------------------------------------------------------------------------------------------------------------------------------------------------------------------------------------------------------------------------------------------------------------------------------------------------------------------------------------------------------------------------------------------------------------------------------------------------------------------------------------------------------------------------------------------------------------------------------------------------------------------------------------------------------------------------------------------------------------------------------------------------------------------------------------------------------------------------------------------------------------------------------------------------------------------------------------------------------------------------------------------------------------------------------------------------------------------------------------------------------------------------------------------------------------------------------------------------------------------------------------------------------------------|
|      |                                  |                                       | <p>HALQEKLVS MENEEIQKLIDDHKATLEARKLEFEAEIEQKKILVEEELGKK<br/> RGDVELMEANINRKEEKISKREQQLEKKA EKVK EKEKEVDARS KALKER<br/> EKTYKNEEKQIETEKKKLEERDDINNEKQELQNLRIILKEEKQQILNAQE<br/> NLKVTEKERNELLKLQTELKEEIEDYRARKQQVENEADELRLEREKFEKE<br/> WEIIDEKREQVRKESAQVDEDRKRISKWVLDEEERLKQEKHALREHIQS<br/> DSDALHLEKEAFKSSMEHERAEWFENVRERADLLRDIELQRSELENSI<br/> EKREEEIEQLLHEKEVEFQKEKEREMQHIREQREVAHKEIEEMRMERR<br/> KLEKERQENTESREHAEKEWTEIKKDIEELQVQREKLKEQRQSLCKERE<br/> EVLRLFEQLKKLKTENVTEHDLKQIADKDGSDSPRPVDAFGFSQQALG<br/> QNVFGTPVDTSVKVNPEPSSGRTDASTSKASRLSWLQRCASKIFNQSP<br/> SPGKVGSDSVWKEETERSHSAALEVVLD AEIERMTHGNTVGEKVEHA<br/> SFADVQND DYTVEAAEDNRQGHGKLSRPVVNFDSLPSVGNH<br/> KSKDKAKIRVFRTRSMKAVVEEAKGILESLSMEKNESEDRQEQEQT<br/> DAAVTANSEDLGKESDKDKDTAKEIDESKGESLASDKKPSHSGKRRR<br/> KYSSRATSAQDADDADIQSELTSQGRRKKRQRDSANGDNSGVGTPGG<br/> KRYNFRSTIASTIAAQTVSLEDKEKDLTTQEEEDSGRVQENVLDQVTE<br/> DNQEASSDEPAKVPSAAETDMNIPPVEDQDPQSYQENGLGDAGNVL<br/> QEVSSHELTKVLKEGAWLRREGRV GALVEIFFCSHREGLAASSTAANRA<br/> ARGRRFTYDAPAGQICPRPNRPFLGLIQPDLCRPPYRSFLGLSKG</p>                                                                                                                                                                                                                                                                           |
| Pab2 | <i>Picea abies</i>               | Congenie.org<br> cl MA_3102<br>3g0010 | <p>MLSPQRTGRRSPVSPSTDGKEKNKGVVVVATSPEARSPVSSIGGSPVN<br/> ENEMWRRRLREVGLDEETLQKKDKAFLVAYITKLESELYDYQCNMGLLLI<br/> ERKEWTSKYEQMKLSASEAEKFKHERAALSTAVAEAEERQEESLKKALG<br/> VEKQCVADLEKALHEMRAECAELKFISDDKLAQAREMVATTEKFLAA<br/> ESKLHAGEALQAEANRKKADAERKLQEVKLVKMHFEESGGLSSLNVNP<br/> VRRSLFLRGKICEDGIKIFRKAKKEHSTLKEKEADLRTSLAALMTREEAVV<br/> KQEIVVDRKEQELLVLQEKLASREREIQRILTDEHKAMLEAIRIEFEAELE<br/> QKRRVVEDELENKENATDLRGLEINRKEEKLSKRELQLEKKA EKLEKEN<br/> ELDSRSRTLKEREKTYKTEEKEMENEK KLEVERKELNNAKQELQKFKSS<br/> LEDERCQILKEQQRLELTKNERDEL DLQTKLKEEIDDLRAQKQELLKEA<br/> DELNVEKEKFEREWEILDEKREQLRKELEWVDDERKKVPKWLKDEEER<br/> LKQEKIVLREEINRDAEGLRLEKEAFESSMQHQRVCF AEVQRERGDV<br/> RDIELRTSELENSIERRREELERHYQEKELSFQKEKEKEKQYISAQRELLHK<br/> ETEEMKSERQLERERKKIATNQEHTDKEWSEMKKDIEELQIQREKLKE<br/> QRESLHKEREELQAQLEELKLLKDELKMT EESLKVSEQQLSQVNINDCE<br/> VISPGHGISQVALRQSVFVAVPENANIEFNISGSPVTRPASASTPSPLSWL<br/> QKCASRLFKPSPEKEGESIFQKQETEREENLVSERVLGAGIGSVSSAGRR<br/> NDYLVENAKHTSEHVDGTLYSRPVMNITQSQSSFLGGNKVKANAKGN<br/> LRVFRTRRSISAVVQEAKEILEVPSERENHESDHVKEPEHETLLNSTGNG<br/> DTTLNGEATRDKANSAQEIDEEREDSIDNGKKNLHSGQKRRHRYSSR<br/> DTSEHNTEVVEIECELTSGGNRKRHQRETTGSPGLETLNGKRYNFRDST<br/> IASMIAPRTTSAECKDKEVSHGEEQDPKNSLENNLEEVSQEPQEVLRK<br/> LTKASLAEVKFKVLPQGGKQIPKRPHQKTLEEFGGELLEGYSRELTRVPN<br/> SRVDEDDQEAYSHELTM</p> |
| Pch1 | <i>Pseudotaxus ch<br/> ienii</i> | onekp:YLPM<br>_scaffold_20<br>84352   | <p>MLTPKRGGWPGWSPTRSSSPAADDKAVVGA EKGGHVTAGSGGGS<br/> SSGAGKAALDAPPRNSLDGNRILATAAPAEPEIWQRFRESGLDHES<br/> LEKKDRAALLAHV NKLEVELDYQYNMGLLLIERKEWTSKYEQMKLCL<br/> AEVEENLKREQSAHLVAITEAEKREESLKKSLGVEKQC VYDIEIALHEMR<br/> AEVAELKFTSENKLTQAREMVASTE EKALAAESKLHAAEAMQAEASRK<br/> HAETERKLQEIAIESAFRRDRQSFKSERDAHEVELSRERQNLLDWEKK<br/> LRDGQDRLLDGQRLLNQREEYTNQRDEALKQFEKELEDVRKQIDNDH<br/> ATLKEKEADINVRLAALSTREENAVKREIVLDKKEQELLVLQEKLANKEN</p>                                                                                                                                                                                                                                                                                                                                                                                                                                                                                                                                                                                                                                                                                                                                                                                                                                                                                              |

|      |                          |                                     |                                                                                                                                                                                                                                                                                                                                                                                                                                                                                                                                                                                                                                                                                                                                                                                                                                                                                                                                                                                                                                                                                                                                                                                                                                                                                                                                                                                                                                                                                                                                                                                                                                                                                                                                                                                                                                                                                                                                                                                                                                                                                                                                       |
|------|--------------------------|-------------------------------------|---------------------------------------------------------------------------------------------------------------------------------------------------------------------------------------------------------------------------------------------------------------------------------------------------------------------------------------------------------------------------------------------------------------------------------------------------------------------------------------------------------------------------------------------------------------------------------------------------------------------------------------------------------------------------------------------------------------------------------------------------------------------------------------------------------------------------------------------------------------------------------------------------------------------------------------------------------------------------------------------------------------------------------------------------------------------------------------------------------------------------------------------------------------------------------------------------------------------------------------------------------------------------------------------------------------------------------------------------------------------------------------------------------------------------------------------------------------------------------------------------------------------------------------------------------------------------------------------------------------------------------------------------------------------------------------------------------------------------------------------------------------------------------------------------------------------------------------------------------------------------------------------------------------------------------------------------------------------------------------------------------------------------------------------------------------------------------------------------------------------------------------|
|      |                          |                                     | <p>E E I Q K L L D E H K A I L E E R K N E F E A E L E Q K K K S A E E E L E K R Q N T L E L I E A D I N R<br/> K E E K I S K R E Q Q M E K K A E K L K E K E K E V D A R S K T L K E R E K Y K N E E K E I E I E K<br/> K K L E R E R E E I N N E K Q E L Q S V K I S L E E E K Q H I V N E Q E N L K V T E K E R N E L L K L<br/> Q T Q L K E E I E N Y R A R K Q E V E K E A E E L R L E K E K F E K E W E F L D E K R E Q V N K E<br/> L T Q V E E D K K R I S K W L R D E D E R L K Q E K S A L R E Q I Q S E T E A L R L E K E A F E A S<br/> M Q H E R V E W L E S I R R E Q A D L V R D S E L H R S D L E N N I E K R Q E E I E K L L R E K E I<br/> G F Q K E R E R E M Q H I S A E R E L A S K E M E D M R L E R H K L E R E R K E I G T S R E H A<br/> E R Q W A E I K K D I E E L Q L Q R E K L K E Q R E S L C K E R E E A L R L F E Q L H K L K S E G N<br/> V T E D G L D L I G N K G R S H V R A G D I Y G F S Q E T L A Q N I F G T P A A A S A K V D I E P<br/> S S G R T F P S A S G T R N R L S W L Q R C A S K L F N Q S P S P E K I V D A T G R K E E T D R S<br/> R T T V P E T G G V E S E R V P G E I V V G L D I E P T F S V D A H N E D V A V E T V R D D K E<br/> Q G I N K S M H A L P S L S R G N G R K S N D K T K I K V F K R T R S M K A V V E D A R G I L D<br/> A P C D N E K N E S D D R Q E P Q K N E A A V P D H T E D K G G R A E G D K T N S A Q G I D<br/> E S N M E S L A N D K R S S K P A S S K P G R K R R R G H S S R A T S E Q D A D D S E I Q S E L<br/> A V R G G R K R R H Q G T A N G G G S G L G T P G G K R Y N F R H S T I A S S V A T Q T L S<br/> M D V K D K G V S L P E E E E A I Y L Q G S S S G K V A N D R R E P S L D K T A R A P S A Q D S<br/> D N</p>                                                                                                                                                                                                                                                                                                                                                                                                                |
| Pch2 | Pseudotaxus_ch<br>ienii  | onekp:YLPM<br>_scaffold_20<br>84265 | <p>A E I K F V S E N K L A K A R E L V A A T E E K S L A A E S K L Y A G E A L Q A E V S R K H A D A E<br/> R L V Q D V E A R E D E L R R Q R Q A F K S Q C E A H E K E L F F E R Q N L Q E W E K N L Q E<br/> G Q E R L L E G Q R L L N Q R E E Y V I E R N E A T K Q I E K E L Q D V K R N V E K E Q T T L K E<br/> K E A D L R G R L A D L T I R E E A L V K R E V I I N K K E Q E L L V L Q E K L A S R E R E E I Q R L T<br/> D E H Q A A L K A R K S M F E A E L E Q Q R R A V D D E L E N K K K A A D I R E L E I K R T E E K<br/> I N K R E K V V E K K A E K L K E K E K D L E G R S R A F K E R E K L C K I E E K Q T E T Q Q K K L<br/> E M E R E E M N N L K Q V L E K T K A A L E E E R Q Q I R K E Q E R L E L T E K E R D E L R T I Q<br/> T K L K E E I D N F R A Q E Q E L S R K D E L L N V E K E K F E R E W E I L D E K T E Q L R K E L E<br/> Q V D D E K K R V S K W L K D E E H R L K Q E R K M L R E Q I K N D E E T L R L K K E A F V N S<br/> K K Q E E A E L L A R F Q R E R A D L F R D I E L R T I E L E N S F E Q R R E E L S N Y Q E R E R<br/> A F Q K E K Q K E M H H I N A Q K E L S D K E F I E V K L E R Q R V D K E R Q E I A T T R E Q I D<br/> R E W S E M K T D I E Q L E I Q R E K L K E Q R E L L H K E R K E F E A E L D Q L T K L K V E L K<br/> M T E D S L K L S E Q Q L S Q A N L N D Y E V I S P G Q Y D G G V S Q A A F R Q N I S A M P F<br/> N T D G L C S E I H P G G A P A S A S D T P S P L A W L Q K C A S R I F K K S P</p>                                                                                                                                                                                                                                                                                                                                                                                                                                                                                                                                                                                                                                                   |
| Pco1 | Podocarpus_cor<br>iaceus | onekp:SCEB_<br>scaffold_205<br>5976 | <p>M L T P K R R G W P G W S P L S R T A P G G E E K S G G A D K A T G G S G G A A V E G P P<br/> R N S L E E N G G I V P P R E E P E T W R R F R E A G S L D P E S I E R K D R A A L V A Q V N K L<br/> E A E L Y D Y Q Y N M G L L L I E R K E W T S K Y D H V K L A F A E A E E N L K R E Q A A H L V<br/> A I S E A E K R E E S L K K A L G V E K Q C V A D L E N A L H E M R A E I A E V K F T S D N K M<br/> A Q A R E M I A S S E E K S L V A E S K L H A A E A L Q A E T S R K H A E T E R K L Q E I E G I E S<br/> T L Q R D R Q S F K S E C D A R E A Q L F L E R Q N L L E W E K L Q E G Q E R L L E G Q R L L<br/> N Q R E E Y T N Q R D E A L K Q I E K E L E D A R K H I E S D H A T L K E K E A D I S L R L A A L A<br/> T R E E N A V K R E I I I D K K E Q E L L V L Q E K L T S R E N E E I Q L I D E H K A I H E A R K N E<br/> F E A E L E K T K I V V E Q E L E K K Q T A V A S M E A D I I R K E E K L T K R E Q Q F E K K F E K L<br/> K E K E K E V D S R L K A L K E R E K Y K N E E K K V E V E K N Q L E R E R E E T N N E K E E L<br/> Q K I K I A L E E E K I Q V L N E Q E H L K V T E K E R N D L L T L Q T Q L K E E I E N Y R A R K Q E<br/> V E K A E E L R L Q R E N F E K E W E F L D E K R E Q V R K E S A Q V D D E R K K T S K W L L<br/> D E Q D R L K Q E K S T L R E R I Q S E T E A L R L E K E A F E A S M Q H E R S E W L E N I R N E<br/> Q A D L V R D I E L Q R S E L E N S I E K R R E E I E K L L K E K E I G F Q K E R E R E M Q H I N A<br/> Q R D L A S K E M E E M R L E R H K L E K E R Q E L S I S R E H A E R Q W S E I K K D I E E L Q V<br/> Q R D K L K E Q R D S L H K E R E E V L R L L E Q L N K L K T E I S V T D D V L N L N G N K G G S<br/> N S Q R T G D V P S I S K E A L T Q N I F G T P A G P S L K F N P E P S S G R L F E S D S G T P N R<br/> L S W L Q R C A S R F F S Q S P S P Q M D D S T D R K G E A A V R P T E E T E T V G A E S E R<br/> G N R E I V V G L E I E R A F L A D A K D Y D A A D Q D K N E K M H E L D I P K I G P S V Y F D<br/> H S L P S S S N G N G R K S S D R S K I K V F K R T R S M K A V V E D S R G I L E V S S D K E M N</p> |

|        |                          |                                     |                                                                                                                                                                                                                                                                                                                                                                                                                                                                                                                                                                                                                                                                                                                                                                                                                                                                                                                                                                                                                                                                                                                                                                                       |
|--------|--------------------------|-------------------------------------|---------------------------------------------------------------------------------------------------------------------------------------------------------------------------------------------------------------------------------------------------------------------------------------------------------------------------------------------------------------------------------------------------------------------------------------------------------------------------------------------------------------------------------------------------------------------------------------------------------------------------------------------------------------------------------------------------------------------------------------------------------------------------------------------------------------------------------------------------------------------------------------------------------------------------------------------------------------------------------------------------------------------------------------------------------------------------------------------------------------------------------------------------------------------------------------|
|        |                          |                                     | ESDKGQALEQNEAVVTDNREKGESAGREKTTSGQEIDGSNMESPATD<br>KRPSKSGRKRRRGQSSRATSEQDAEDSEIQSEPAIGGRRKRQQSAAN<br>GGSSGVGTPGAKRYNFRHSTIASSVATQAQSVDAKDKD                                                                                                                                                                                                                                                                                                                                                                                                                                                                                                                                                                                                                                                                                                                                                                                                                                                                                                                                                                                                                                          |
| Pco2   | Podocarpus_cor<br>iaceus | onekp:SCEB_<br>scaffold_205<br>5963 | SPVNETEIWKRLKQVGLDEETLQKKDKAALIAHITKLESELYDYQYNMG<br>LILLERKEWTSRYEQLKISAEAAEGNYKHDQAAHLAALADAEKREESLRK<br>ALGIEKQCVADLEKALHELRAESAIEIKFVSENKLAQAFELLAATEDKSLA<br>AESKFHAGEALQAEANRKRADAERMLQVEAREDELRRQRQAFKSEC<br>DAHEKESYFERQSLREWQKKLQEGQDRLLLEGQGLLNQREYILERSEA<br>TKQIEKELQDVKRKVEKEQSTLKEKEADMVRLADLTIREALVKRETVI<br>DKKEQELLLLQEKLATREREEIQRLLTDVHQAVFEAKILEFAEVEQKCR<br>VDELENKRNAADMRELEMKCKEELSKRGQQLKKAELKEKEKELD<br>AKLKALKEREKFFRIDEKEFETQKKLEEREEMNNLKQVLEKLKAALEE<br>ERHRIHKEQEKLLETENERNDMKIIQTKLKQEIDNLRADQELSKKEDLL<br>NVEKEKFEREWEILDEKTEQLKKELEQVDEEKRRVSWLKDDEERFKQ<br>ERRVLREQIKSDEEALCLKEAFASSKRHEETELLAKIEKERADIYRDIELR<br>TSELEKSFEQRREELERHYQDRESAFLKEKQKEMQQIQAQKEMSDKEL<br>EQIQLERQKLDREWKEIATTREQUIEREWSEMKKDIEELQIQKDKLKEQR<br>ESLHNERHELEAQLDQLNKLKADLKMTEDSRKLSEQQISQVNVNDCEV<br>ISAKQFDGCGSSQAIRQNVSAIPCKTDDFCSEIYLGSTPGSASDTPSSF<br>GWLQKCASRLFQKTP                                                                                                                                                                                                                                                                                                |
| Pda1I  | Phoenix<br>dactylifera   | KEGG<br>pda:1037151<br>39           | MFTRQKKGWSLLPRATERSSGSVPLNPRDGSGMILNMGNGKKGKIA<br>VAEALPPPQASLGGDKGAVLARECGEEVWRSFREAGFLDESVLHRR<br>NCEAFAQRRISELEKELYDYQYNMGLLIEKEEWASKYEEIRKGLAEAGET<br>RKREAAHWIARSELEGRDENMRKALVVEKQSIVDLEKAFHDKSGEN<br>VEAKFMFDETLAETHALEASIGDRYLEIKGKLHSDVPRLAESWRSP<br>DRKLEDVEVHEPELRKESTAFTTGKRKHENDLTQOREVFRAWEQKLRA<br>WEQKLQDGGKKLDEEQRFLDEGENEANRRDIVLQKEELEEARKETEV<br>ANNSLKNKEKDISTRLEALDAKGKVEIQKLLDDHKMILESTKREFELEM<br>KKRNIFDQEVKDRDLDAVEKKSIEINVREVQIFNKEQDLEIELQTLKNKDK<br>RFNEILDALKEREDSIRKDENLKLDEKENLARDTQKLVSSQTELENSRAA<br>MEAERLQTIKERENLEVAREERVYHLLQSKLEQEVDDYRIMKEAHRKE<br>TEELRKERDRLEKESVLDNRRRLALETQKLNVEKERFEKWRVVEEGKL<br>KKERLKLTIQRELEEVGAVKETLGNLSLHQLDPVELFKKKHADIKDADE<br>LKIQKLPDQDWLEGDKELHVCRNKWEAEQLDIQKDITTLQFIRKSLKN<br>QQEALIKEKERIFALAEQFKCCKNCGFKIGDADVHGIQIPRGTEGSENIL<br>LPSLANNYLKEPMEGEHTDASPQGTSPQHVTGGCESFLQKCSSLFSH<br>GKVANQSSDGHKSSLFNAHLDAEASEEEAKFQHAPSFSVNTSVD<br>CRAQSVGEVWYNGESKGLDKANDEAKPSFGVADISTEMMKFQSGNN<br>ATEMEDEPNFPSIHEKSGREGSFLPETNSQVQASKQRQHQSSSSARC<br>KIIKRTL SVKAVVEDARAITGVNSEEKHDEQSNGEDRHSQCVEESLDD<br>SVHDDQSPSNAEQNTHFSDASGLTNSSELDAGDGEVHSESVSRRGRRK<br>RRQTTSPGTVTPGLKRYNLRHSTIVATMTTAQGLSNQKNGQKKGSPW<br>QPY |
| Pda1II | Phoenix<br>dactylifera   | KEGG                                | MFTPQKKGWAAGWSLSTRVGDGPDGGSAPV NARSAGGV SFGKGGK<br>KSVAAEALPPPQASLGENGSDVAGGAGDVEVWRRFREAGLLDES<br>VLQRKEKEALVQRRISEIETELHEYQYNMGLLIEKKEWTSKYEEFRQGLAE<br>AEEILKREQAHAIAISEYEKQKENLQKALGVEKQCVADLEKALREMRGE<br>IAEVKYTSDKKLAEAHAEASLEEKYLEIEGKLHSAADAKLAEASRSSEVD<br>RKLDDAEARERKLQKEYLSLNTERTKYKDLDEQRQHLREWENLQES<br>QKRLLEGQRSINDREERANETDRVLKKKEELEEARKMIEVTKNSLKEKE<br>DDIRNRQNALAFKEKEASINIENLEKKEKELLAIEEKL NAREKVEIQKLLD                                                                                                                                                                                                                                                                                                                                                                                                                                                                                                                                                                                                                                                                                                                                                      |

|        |                        |                           |                                                                                                                                                                                                                                                                                                                                                                                                                                                                                                                                                                                                                                                                                                                                                                                                                                                                                                                                                                                                                                                                                                                                                                                                                                                                         |
|--------|------------------------|---------------------------|-------------------------------------------------------------------------------------------------------------------------------------------------------------------------------------------------------------------------------------------------------------------------------------------------------------------------------------------------------------------------------------------------------------------------------------------------------------------------------------------------------------------------------------------------------------------------------------------------------------------------------------------------------------------------------------------------------------------------------------------------------------------------------------------------------------------------------------------------------------------------------------------------------------------------------------------------------------------------------------------------------------------------------------------------------------------------------------------------------------------------------------------------------------------------------------------------------------------------------------------------------------------------|
|        |                        |                           | DHNETLNFKKKEFELDLEQRRKSFDEELKWKLDAVDKKTTEIDCKEEQV<br>TKREQEVEKKMQSLKQKEKDLDTKSKALKKWEESIKIGEKKLEEEKQQL<br>GREMQLHVGSRNELENLKATVEEAKQQMIREEENLKLTKEEREQHLL<br>QSKLKQEIEDCRIIKESLLKEQEDLRGLRENFEREWDVLDKKEVEAEV<br>KKVNYEREKFEKWRLNEEERLNNEVLAAKADIQRELEELRLKKTFFEST<br>MELEKSNASEELERGHADIARELELRKHELEMMDMQKKQEDMEKQLQE<br>KENQFNWRDRELNQINSVKNL NESKIQKLMKMEQDQLEREKEELSKHS<br>KKLESQIEIQNDIETLRMLSRNLKDQREHFIFIKERFLAFAEQYKVKCN<br>CGVTMSDLELLQMGTDAGDIQLPSLALEEHLKGGKNAEISPPGTGLRS<br>VISGGRMSWLQKCSRLFNFSQKQAEKMSQCAEKSLSFGARLDGEA<br>SEGEANYEPGPSYGVGNDFIDAQGVQSDSGVGRNEESERLVEVGDGP<br>EPSFGIADNSTDIQVEGEQITAPVDERNEREESMPTENDLQPEPSKQR<br>RRLPGRKGRPKAIRRTRSVKAVVEDAKAILGETSEEKNDGPPNGVTKDS<br>LNIQEESSQGDSVHADTGATSSRQKRRLAHASGMTTGEPEQRIVKHVQ<br>RAFHLADVEKGVISQLLEHRLLEERSATISGALQLRAMLQPKQCLIRLNS<br>IRQEAFNSQLKMR                                                                                                                                                                                                                                                                                                                                                                                                                                            |
| Pda2I  | Phoenix<br>dactylifera | KEGG<br>pda:1037136<br>70 | MASPRPRSSPLPGAARSPASTVAGASPPASGAAPLGDIAIWRRLREA<br>GFDEESVRRDKAALIAYISMVESERYDCQHMGLLILERKEWTSKYEQ<br>VKASAESAEEVVRNEKAAHLSAIAEARKREESLKKALGIEKECVANIEKA<br>LHDMRAESAETKIAYENKLAEVRQMMEEAAQEKFDEAERKLLAAESLH<br>AEASRSRNAALRTLQDVEAREDKLRDRISFKFECDAKEQDINCDRQIL<br>YDRQKILHEEQERLIIAQTLLNQREEYIFERSKELSCFEKELERTRTNLEEE<br>HRALSEEKSDLKIAALATREESMIKRESLLEKRECELLMLQEKIACKEH<br>DEIKRLTDKHSALERKRSEFEAELEHRCKMLEDEMEAKRTACEVREAE<br>LSNRENAIQEREHCIKLELSALAEKEENVAKMKLLEEREQNLHSTQKA<br>AEIEMQNLQKEREDMLKMKLDLENYKSSLEDEKKGLLCVQEKELTIAE<br>RNELLVLERKLEEIDSLRAQKMELVAEADTLKAEKEKFEIEWELIDEKRE<br>ELRKEAEWVAERKAVDRYLKDEHDSIKLEKENLRSQFKSDVESLSRERE<br>EFLGKMELEHSDWFCKIQQEREDFVRDIMIQRKELENCIDKRREEIETYL<br>KEREFAFEQEKARELQHINSQKESIAKELKRVASEMQKLNDRMEIAQ<br>DREKREKEWSEIKNSIEALNVQREKLQKQRELLHSDKEEIQYQQLKLL<br>EDLDIESENALSETPNKWRVTLKTNMNSDVVQDIHDPNGRQVTAN<br>GGSKLKLSEKTPEVSPPTPINLSWVRKCAEVIFKRSSEKNLEHVECKNP<br>VKFGKVSEGNLNSPKSVYYRKKNSRDGKRISMSKWKDLQDPSVASQ<br>KMESKGHERTGRKEMQSARSDSLLVESNEGLRIAKIESNTNKEVGELIE<br>DCEEKSGNTDSALPLGRKRHNNALSHDQADMQLPSQKHQRKTKQN<br>GSADVEGIASNCLFGMRMPNSDDCDSASLNPTSGCEELLVGCKDQEC<br>ENPEVSIPKSPEVSRNTSAVSHSHIFENGLHSGSGSFLVGDGMILLSSS<br>NFHEIMKKQEKVEEQVIIIEAEPSPKAMELISNDGDEIKELDGSNQDGD<br>NEVEDEEDENSLSAKQLWKFLIT |
| Pda2II | Phoenix<br>dactylifera | KEGG<br>pda:1037122<br>75 | MASPWPRASPLAVAATRSPAPRVAGASPPANGGTPLGDDAIWKRLR<br>EAGFDEESVRRDKAALIAYISKLESEVYDYQHMGLLILERKEWTSKYE<br>QVKISAESAEEVVKREKAAQLSALAEARQREESLKKALGIEKECVANIEK<br>ALHDMRAESXETKLAYENKLAEARQMMEEAERKFDEAERKLLAAESL<br>HAEASRSRNAALRNLDVEAREDELRRDRISFKSECDAKEQEINSERQS<br>LYDRQKILNEEQERLIIAQTLLNQREEYIFERSKDLSCFEKELEEARRNLE<br>EKHKALKEENSNDLKIAGLATREESVIKRESLLDKRERDLLILQEKVACK<br>EHDEIQRLMDEHQSALEKRSSEFEAELEQRRMMLEDEMEAKRTANEA<br>KVADLSNRENAIQEREHAIKLELSALAEKEEDVVKLKLLEEREQNLHST<br>QTAAEEMQNMQNERGEMMLKQKQLENKSSLEDEKKEIQCAQEKLEL<br>TLAERNELLVLEGKLEEIDNLRAQKMELIAEADKLKAEKENFEIEWELI                                                                                                                                                                                                                                                                                                                                                                                                                                                                                                                                                                                                                                                                             |

|      |                      |                                     |                                                                                                                                                                                                                                                                                                                                                                                                                                                                                                                                                                                                                                                                                                                                                                                                                                                                                                                                                                                                                                                                                                                                                                                                                                                                                                                                                                                        |
|------|----------------------|-------------------------------------|----------------------------------------------------------------------------------------------------------------------------------------------------------------------------------------------------------------------------------------------------------------------------------------------------------------------------------------------------------------------------------------------------------------------------------------------------------------------------------------------------------------------------------------------------------------------------------------------------------------------------------------------------------------------------------------------------------------------------------------------------------------------------------------------------------------------------------------------------------------------------------------------------------------------------------------------------------------------------------------------------------------------------------------------------------------------------------------------------------------------------------------------------------------------------------------------------------------------------------------------------------------------------------------------------------------------------------------------------------------------------------------|
|      |                      |                                     | DEKREELRKEAERVAERKTVQYLKTEHDIKLEKENLRNQFKSDAESL<br>AREREFLSKMEREHSDWFSKIQQEREDFVRDIMIQKKELENCMDKRR<br>EEIETYLREKEEAFDQEKARELQHINSQKELIVKELEHVASEMQKLNDR<br>MEIALDREKREKCESEIKSSIEALNIQREKQKQRELLHSDREKIYQEIQR<br>KKLEHLDIESENRALSETPNKWKVSLKTNTNADVAHDIDDPIEQKITVN<br>DGSNWKLPSSEKTSHASPRSTTLSWVRKCAEVIFKHSLEARNIEHAECKN<br>SAKFAKVSEGNYSSEKSVSHRNKNCGDGKRISLSKWKDLQIPSVASEG<br>MDSKGHERTGRREAQVRSRSDSPHVERNEGLCNAEIEGDRDNKVSHVI<br>EDSEKSRNADSALPLGRKRLHNTLSYENADMQLPSQKHQRKTRQNG<br>SADVEGVTSDCLLVQMPNSDDCDPSSLNPTSGCEELPVGCKDQEYE<br>NPEVSISKTPEVSKDTSTVLCPRILENRDSDHSGSENYLLGDGILLYSSNFH<br>KMLKKQEKVGDQVIFEAEEPSKEITTSTMEQTADDGGKIKEQDRCNRD<br>GDDEVEDEDEDRLSTKEKLWKFIT                                                                                                                                                                                                                                                                                                                                                                                                                                                                                                                                                                                                                                                                                                           |
| Pen1 | Picea_engelman<br>ii | onekp:AWQ<br>B_scaffold_2<br>057224 | MLTPKRRGWPGWSPKTPSPPPPAEEMAGSSHVATPTATAGGSSGGR<br>ALVEAPRNLDDNNGEIVAARGDPEIWRRFREAGSLDEESLEKKDRAAL<br>VVHVTKLEAELYDYQYNMGLLLIERKEWTSKYEQMKVAIAEAEENLKR<br>EQSAHLIAISEAEKREESLKKALGVEKQCVMDLENALHEMRAEMAELK<br>FTSENKLAQAREFAASTEELKALAAESKLHAAEALQAEVSRKHAEMERK<br>GQDIEAVERTLQRRERQSFMSERDAFESDLSLQRLLEWEKKLQEGQE<br>RLIEGQRLNQREYINKRDEGMKQIEKELEDAKIQIEKDQATLKEKEAD<br>ISARMAALATREEDIVKGETVINKKEEELHALQEKLVSMENEEIQKLIDD<br>HKATLEARKLEFEAEIEQKILVEEELGKKRGDVELMEANINRKEEKISKR<br>EQQLEKKAKEVKEKEKEVDARSKALKEREKTYKNEEKQIETEKKLEER<br>DDINNEKQELQNLRIILKEEKQQLNAQENLKVTEKERNELLKLQTELKE<br>EIEDYRARKQVENEADELRLEREKFEKEWEIIDEKREQVRKESAQADE<br>DRKRISKWVLDEEERLQEKRALREHIQSDSDALHLEKAFKSSMEHER<br>AEWFANVRERADLLRDIELQRSELENSIEKREEEIERLLHEKEVEFQKEK<br>EREMQHIREQREVAHKEIEEMRMERRKLEKERQNTESREHAEKEWT<br>EIKKDIEELQVQREKLKEQRQSLCKEREVLRLEFQKLLKTELNVTEDHL<br>KQIADKDGSDSPRPVDAFGFSQQALGQNFQIFGTPVDTSVKVNPEPSSGR<br>TDASTKASRLSWLQRCASKIFNQSPSPGKVGSDVWKEETERSHSA<br>LEVVLGAEIERMTQGNIVGEKVEHVSSADVQNDYDTEATEDNRQGH<br>GKLKSRPVNFDNSLPSVGNHGHKSKDKAKIRVFRTRSMKAVVEEA<br>KGILESLDMEKNESEDREQEQTDAAVTANSEDLGKESDKDKTDTAK<br>EIDESKGESLASDKKPSHSGKRRRKYSSRATSQAQDADDADIQSELTS<br>QRRKKRQRDSANGDNSGVGTPGGKRYNFRSTIASTIAAQTVSLEDKE<br>KDLTTQEEEDSGRVQENVLDQVTEDNQEAASSDEPAKVPSAAETDMNI<br>PPVEDQDPOSFQENGLDAGNVLQEVSSHELTKSETAEFYVESEDEGG<br>NGEDIEELDETEEDGEEIDEDGNNVGEDQKTSRKKLWNFLT |
| Pen2 | Picea_engelman<br>ii | onekp:AWQ<br>B_scaffold_2<br>057216 | ARSPVSSIGGSPVNNENEMWRRLEVLDEETLQKKDKAFLVAYITKLES<br>ELYDYQCNMGLLLIERKEWTSKYEQMKLSASEAEKFKHERAALSTAV<br>AEAQKQESLRKALGVEKQCVADLEKALHEMRAECAELKFISDDKLAQ<br>AREMVATTEEKFLAAESKLHAGEALQAEANRKKADAERKLQVEARE<br>ALRRERRAFKSECESREKEFILERQNLRGWDKNLQEGQERLLEGQKFLN<br>QREAHIMERDEALKQIEKELQDVKMTVEKEHSTLKEKEADLRTSLAAL<br>MTREEAVVKQEIIVDRKEQELLVLQEKLASREREIQRILTDEHKAMLEA<br>IRIEFEAELEQKRRVVEDELENKENATDLRGLINRKEEKLSKRELQLEKK<br>AEKLEKENELDSRSTLKEREKTYKTEEKEMENEKLEVERKELNNAK<br>QELQKFKSSLEDERCQILKEQQRLELTKNERDELQTKLKEEIDDLRA<br>QKQELLKEADELNVEKEKFEREWEILDEKREQLRKELEWVDDERKVP<br>KWLKDEEERLQEKIVLREEINRDAEGLRLEKEAFESSMQHQRVCFAE                                                                                                                                                                                                                                                                                                                                                                                                                                                                                                                                                                                                                                                                                                                                                |

|      |                       |                                       |                                                                                                                                                                                                                                                                                                                                                                                                                                                                                                                                                                                                                                                                                                                                                                                                                                                                                                                                                                                                                                                                                                                                                                                                                                                                                   |
|------|-----------------------|---------------------------------------|-----------------------------------------------------------------------------------------------------------------------------------------------------------------------------------------------------------------------------------------------------------------------------------------------------------------------------------------------------------------------------------------------------------------------------------------------------------------------------------------------------------------------------------------------------------------------------------------------------------------------------------------------------------------------------------------------------------------------------------------------------------------------------------------------------------------------------------------------------------------------------------------------------------------------------------------------------------------------------------------------------------------------------------------------------------------------------------------------------------------------------------------------------------------------------------------------------------------------------------------------------------------------------------|
|      |                       |                                       | VQRERGDIVRDIELRTSELENSIERRREELERHYQEKELSFQKEKEKEKQ<br>YISAQRELLHKETEEMKSERQRLERERKKIATNQEHDTKEWSEMKKDIE<br>ELQIQREKLKEQRESLHKEREELQAQLEELKLLKDELKMTESLKVSEQQ<br>LSQVNINDCEVISPGHGISQASLRQSVFAVPENANIEFNSGISPV RTPAS<br>ASTPSPLSWLQKCASRLFKPSPEK                                                                                                                                                                                                                                                                                                                                                                                                                                                                                                                                                                                                                                                                                                                                                                                                                                                                                                                                                                                                                                   |
| Pha1 | <i>Panicum hallii</i> | Phytozome<br>12<br>Pahal.A0311<br>9.1 | MFTPQGGKGTGWSTPTPANQRSGGGAPAASAPLGKGGKGRVAELEH<br>ELHEYQYNMGLLLEKKEWAKELEEVSQLKQKEEILKREQAAHLNAIS<br>EYERREESMRKALGVEKQCVIDLEKALREIRSEIAEVKFMSEKKTADAQS<br>LEASLEEKSLIEGKLHAADAKLAEANRKKSQADRDLDEVEARQRRELEK<br>EKLYFETERKAREKQLKEQEESLQEWDKKLESQNRLVDLQRSINDREE<br>RANKNDQLFKIKHGELEEARKSVEANKRALKAKEDDINRRLNELHSQEK<br>DANSKRKELEEQEKKLIEREEKASSREKEGLQKLLDHDQVLETKRDFE<br>LELARERKSFDEKMVQKQADLVKREKDVKSLEAKLSKSEQVLNDKKKE<br>MEGWQNDLDAKSKALKRWEESLKNDDKRLLEEKQRMDDQEKHQVE<br>MSKSELERIKSTLEAEKERILEEQNNLKLTEERQEHVLTTEKLKKEIEEYR<br>MRSNSLSEEIEDLRKQRQKFEFEWEQLDEKRAHLVEEGKVNIERMDL<br>ERWRDSEEKRLNDAKLEMEERYKEKLENLDRKEKALNDDIKHKQMEN<br>DELLKGERADLKRKLQLHQHELEMELEQKQASKEKELEDKENELNKKM<br>DFVENKLRHAIELNESKIQKIIEKKQLQMERKILLEERQKLETDKADIKR<br>DIDSLHVLSQSLKLRRESYNRDRNINLFEKYKVKNCGISLFEGLDLSLA<br>LKDSVEIEYPSLAVERDDRSLNADTSAPDTGTLVNSGGRLSLLQKCSRLF<br>KFSPVKKGDQSSEQPTENIPFGARLEEASRSDGDYEPTPVYIEAHDSFD<br>AEDDLPSDSGARENEESKRHPADDVQMESSFGVADNGIDVVRGTQSF<br>DGTNDMAVDATIASVDQNGKDSAAPAEAVQPEISKQGRRQQRKRG<br>RGKGGVKRTRSVRAVVEDAKAILGETLEEKNDGQGDPAVAVGTRKRRF<br>AGATISEQDEEGSEAHSESVSLGGQRRKRRQTAGAVTETPGEKRYNLR<br>RSTVANATAATVQTDKKAAGKHKHVEAPADDTGTSKAVEEPAP<br>ESKRASEADYGASQLHEFSQAEVGDAPAPAEGIGEEEDGDIVDGKEAL<br>PDVPMTPSGSELGAEQDGEDDDDLERRNQSISKKLWSFFTT |
| Pha2 | <i>Panicum hallii</i> | Phytozome<br>12<br>Pahal.E0150<br>2.1 | MASPRSAGAGGGAAGDEAIWRKLREAGFDEDVRRRDKAALIGYISR<br>LESEIYDYQHNLGLILLERKELASKYEQLKASSEATEIMLRRERAAQQSAL<br>AETRKKEENLKNLCIQKECVSNLEKALHDMRGEAAEVKVSYEAKLAEA<br>LQMIEAAQKKFDEAEKLLAAKSLEAESIRTRNASLRLQDIEDREDQLR<br>RDRTSFELESASKEKEISLQRKLLDDTKKILHEKEQALLKEQTLNQRDD<br>NILERLGYITHSEKRLEEEKLNLEDERKVLMEEKNKLDLKMQAISREEAII<br>KKESLLDKHETELLVLQETIASKERAIEIERLRQEQEVALAKRRQEFDTEM<br>EIKLTSFEEIEARKALLDQRESALSEQEDSVAQREQNLNLRLAELTNKEE<br>SLVKRSDELNEEERKLSHREVVYTELQKEREIIONMKLDLEKEKSFEE<br>EKREAIQAQEKLLITQNEREDLLILEMKLKEEIDSLRAQKVELMVD AERL<br>LAEKERFEIEWELIDEKKDELQKEAARIAEERRVIDEHLKNELDIKQEK<br>NLRIQFKNSAESLACEHKEFMNKMQRHASWLSRIQQEREDLKRDI<br>QRTELLNSAKARQMEIDSYLREKEEFEQKKSKELEYINSEKETISSKLEH<br>VRLELQKLEDERKEAMLERERREQELSEIKNTIDALNEQREKLQEQRKL<br>HSDREAITQQIQQLENEELKIETENKQLSLRQCGRSKHGDCDVENLKE<br>NGVHQSPDEDQHASPCKSSPKLILGKKLDVSPSVSTPISWVRKCAQVI<br>FKRSPEKSADHDNDRFAHAKLGNVNDPSLVGNGGLFACQMENGAGE<br>VQHAVEKVGKKRLNNAISHDQSEILEPKRKHQRSSTLPRRVRGGEIDS<br>NCSPSVLEEKCSKNEHDAVPVGLPGKGLHNPRTGELASSDASDIPEASE<br>PSEEISVSAAEALNGDAEDKDEPDESDDEGEEDEEKTSSAKKLWRF<br>LIT                                                                                                                                                                                    |
| Por1 | <i>Platyclus_orie</i> | onekp:BUWV                            | MMTPNRRGRWSGWSPTSRSPPAVDDKAVAVVEKSAGKAAVEAPPR                                                                                                                                                                                                                                                                                                                                                                                                                                                                                                                                                                                                                                                                                                                                                                                                                                                                                                                                                                                                                                                                                                                                                                                                                                     |

|      |                          |                                                                    |                                                                                                                                                                                                                                                                                                                                                                                                                                                                                                                                                                                                                                                                                                                                                                                                                                                                                                                                                                                                                                                                                                                                                                                                                                                                                                                      |
|------|--------------------------|--------------------------------------------------------------------|----------------------------------------------------------------------------------------------------------------------------------------------------------------------------------------------------------------------------------------------------------------------------------------------------------------------------------------------------------------------------------------------------------------------------------------------------------------------------------------------------------------------------------------------------------------------------------------------------------------------------------------------------------------------------------------------------------------------------------------------------------------------------------------------------------------------------------------------------------------------------------------------------------------------------------------------------------------------------------------------------------------------------------------------------------------------------------------------------------------------------------------------------------------------------------------------------------------------------------------------------------------------------------------------------------------------|
|      | ntalis                   | _scaffold_20<br>10742                                              | NSLDGNGRFTPAAAAAAEPEVWRRFKESGSLDQDSLEKKDRAALLHI<br>NKLDAELYDYQYNMGLLLIERKEWTSKYEQMKLALVEAEESLKREQSA<br>HLVAITEAEKREESLKKSLGVEKQCVSDLEKALHEMRSEVAELKFISESKL<br>AQAREMVASTEETLEAESRLHAAEALQAEASRKHAEETERKLQEIESIE<br>NALRRDRQSFKSEREAEVELSLQRRNLLDWEKKLQDGGDRLLEGQRL<br>LNQREEYTNQRDKALKQIEKQLEDACKQIENDHSILKEKEADISVRLTAL<br>STREENAVKREILIDKKEQELLVLQEKLANKENEEIQKLLDEHRAILEARK<br>TEFEAELEQKKVSVVEELEKRRSALELFEADIKSKEEKISKREQQIEKKTDK<br>LKEKEKEVDSRLKTLKEREKTLKSEEKEIMIEKKKMDGEEKEINNEKQEL<br>QYLKVSLEEEKHQIFGEQEKLLTEKERNELQNLQSELKEEENYRARKQ<br>EIEKEAEELRLEKEKFEKEWEFLDEKREKANKELALVEEEKRSLKWLRD<br>EEERLKQEKSAKERIQNETEALHLEKEAFAASMQHERAEWLESIRREQ<br>ADLIRDSELHRSDLENNIEKRQEEIEKFLREKEIGFQKEKERETQHICAQR<br>ELVSKEMEEMRLERKKLEKEREIEISRSRQHAETQWIEIKKDIVELQVQR<br>DKLKEQREYLCKEREVSRLSLQLENWKRELNISEDSDLIANNGGNCR<br>AEDVYDFSHQGVPQKFFGTPASASAKGDPEPSSGRTVRSASGTPSRLS<br>WLQRCATRRFNQSPSPEKIIDGMGQKGETDRPPTMLPETTGAESERM<br>TGEIVVGLEIQPTFSADDQNHDAEAEVVAQAEGTSKSSPAVKFDQS<br>VPSRSKNGSKSIDKSKVKVFKRTRSIKAVVEDARGIIDAPSDQEKNESE<br>SREEHAVADDRQDKEGRAGGDQTNQAQEVDDSNRESLATDKSSKS<br>GRKRRRGQSSRITSEQDADDSEIQSEGAAGRRRKRQKGTNNGGTSVLA<br>TPGGRRYNLRHSTIVSHIGNQTPSCNLKKKSRRRIWKGLHQSRIQRIAESP<br>AMEPSAQSDNIIPQGETHDFPGHPDGGLEDNIQEVLSHEHTKSETG<br>DHYDETDNNGEGNEEDTPIDEIEDEQIDELDEDGDDEEEDNNSLKKKI<br>WKFLTS |
| Por2 | Platyclus_orie<br>ntalis | onekp:BUWV<br>_scaffold_20<br>55365                                | SPVNEEMWRRLLKKVGLDEETLQKKDKAAALIAHITKLETEVYDYQYNM<br>GLILLEHKELISEYEQLKLTAGEAEGNFKRDRAAHSAAIAEAEKREESLRK<br>ALGIEKQCVADLEKALHEMRSAEAEIKFVSETKLAKARELVASTEESIA<br>AESKLHAGEALQAEAKHKYADAERLLQDVEAREDELRRQRQSFKSECE<br>AHEEQFFERQNLREWEKNLQAGQERLLDGQRLLNQREEYVIERNEVT<br>KQIEKELQDLKRNIKEQSSLKEKEADLRGKLADLTREEALVKQEVIIINK<br>KEQELLLQEKLATREREIEIQLRTDEHQAALEERKSVFEEEMKQQRKAV<br>DDELANKRNAADVREFEIQCREEKISKREQQVEKKIEKLEKDKELDTRL<br>RHAKEREKSKIKKEIETQLKQLAIERDEMNISSKQVLEESKATLEERQ<br>QICKEQERLELTEKERDDLRIIQLKKEIDYFRQQEQELKKDEVLNVEK<br>EKFEREWEILDEKMEQLRKELEKIDNEKKRISKWLKDEEERLKHERRML<br>REQIKNEEEALRLEKESFANSKKQEEAELLANFEKERADLYRDIELQKSEL<br>EKSIEQRQEELERNYQVRERVFQKQKQKEMQYINAQKELSEKESQEM<br>KLARQLDREKQEVTTREHIDREWSEMKKDIEEMEIRREKLKELRELLH<br>REREEFEAQLDQLKLLKDELKVTEDSLKISEQPLSQAIVNDCEVISPGHF<br>DGGISQAACRQSIGMAFNGDDFRSEMHLTRSTASASDTPSPPLAWLQ<br>KCTSRIFKSPGVGTERIGLKQSLA                                                                                                                                                                                                                                                                                                                                                                                                                 |
| Ppa1 | Physcomitrella<br>patens | Phytozome<br>12<br>Pp3c2_3483<br>OV3.1<br>Alias<br>Pp1s76_81V<br>6 | MSGLSPMYTPQGMRGSPHQRETPIRSLAREKGTSPATATTVGVVTT<br>TMTTLTAGGEEGLVLMNPLTGAPDTNGEADGVPDTPDVKRFQSEGA<br>LDISSLERKDRAALHARIAALEAELYDYQYNMGLLLLRKQVSSQVDEL<br>KAAVADAQGTQREKAAHLELLETEVIRREEAAKSALETEKQCVADLEKA<br>LKEIQADESEVRQAADKQLAQARELVASIEERSIQADLKLQVQVVRRA<br>DANRKLQESEHRLQVEAREVALRLERHSLIADVEARKEQVESEASLR<br>EWEKRLDGRMRLQEGERLLNERENSLKERDEALKQINREVAEARSYIE<br>KERVLIQKSDVDLNAVARAVAFSEKERALSERELEILKKDQDLILAEERIADK<br>TREFETREQQVRETEVYFGQERTRLSDFETALKFREESLEEQKHELAEM                                                                                                                                                                                                                                                                                                                                                                                                                                                                                                                                                                                                                                                                                                                                                                                                                                   |



|      |                       |                                                                   |                                                                                                                                                                                                                                                                                                                                                                                                                                                                                                                                                                                                                                                                                                                                                                                                                                                                                                                                                                                                                                                                                                                                                                                                                                                                                                                                                                                                                                                                                                                                                                                                                               |
|------|-----------------------|-------------------------------------------------------------------|-------------------------------------------------------------------------------------------------------------------------------------------------------------------------------------------------------------------------------------------------------------------------------------------------------------------------------------------------------------------------------------------------------------------------------------------------------------------------------------------------------------------------------------------------------------------------------------------------------------------------------------------------------------------------------------------------------------------------------------------------------------------------------------------------------------------------------------------------------------------------------------------------------------------------------------------------------------------------------------------------------------------------------------------------------------------------------------------------------------------------------------------------------------------------------------------------------------------------------------------------------------------------------------------------------------------------------------------------------------------------------------------------------------------------------------------------------------------------------------------------------------------------------------------------------------------------------------------------------------------------------|
|      |                       |                                                                   | <p>EKFLKSHTSDVDSKKAELLTAAEEELRSVRKVLAAEKEEVETLKLVAESREA<br/> RLRHLEAAITAREEEELRVQEVVDREKVLERRLEEVSNLEQGIRFEEKY<br/> ENEHQRIAELKEEIRKAKQEMEENKRKLELQKQQIEEEREHLRRECELER<br/> QEIEEEREKVRKDWEEEREWEQQRLLVQKDVYKKEQLELEQERLRG<br/> ELKAERERQGALENLRVNLHNNLEVLREKLKAEVEYERDALRKEIAD<br/> QERVAGLREESRKAIEAEREQVDEGRSRIRRELELERQQLIIEESERAHAA<br/> YLERQKFEDEQEKLKALEQEREELVRIQVQLKQEIIDEIRARKQFVDEEA<br/> QELKQQKDRFEREWELLDEKREATRKERERFEEEFKRVTEWMRDEEER<br/> LKETRREFQEQSRRMTEELQKERISWESRLETERNQLYAQLDAERQEL<br/> NRNLERQREDLDRRLELESEAFKQFEEREACLRAEVEQEKEKDLRKNR<br/> GSVIGELEQLRAERSKLEKERQELLKQRADAKEWDEIKKDIHQVQVQG<br/> EKLREQRQSLHIERQNTLLETERLQKLRDQMKGSEGSMSMRVSEQPM<br/> RMDEEVVSPHSHGLVRTDLRTSALPFVLGTHHASSQTPSRRMIART<br/> PSRLAWIQRASRASQLFLSPNKLLTGQEPILKEDTDEGEPRLGANDP<br/> CSSFNQSQLGQVLDTTEDSHRFKRTWSTQRVVEEANTIPGLQEEKNFE<br/> SRNRSNVVTFSTPDASGDTRKKKRARGNVDDDEVLLQSQPDAEDQGG<br/> TKRKKRIKDIMVESETNGDSLIDTPRSRVGTPATKRYNFRPTTIVNMMG<br/> ASENESSRHHDSNKAASAANQPAAASVDRLPDASSQPVDTEIDM<br/> HEAPTVEEGFEAREQNNVAEDDQERDTTAAVADHFPITQVVTETTTT<br/> VTETIREQAVFDLNGVENVEIARTVPEQEGIPTAGEVYLSRSVWLPGE<br/> AAEATAGDSLQADEADARDAQNQSDRSDEEVAEVTDDSAEEVDED<br/> GNGTESGENGDAASVGGESLSEESGAEEVEEEDVGEVEDEDEYDTRE<br/> DEPDDEGPTPTIREKIWDFLT</p>                                                                                                                                                                                                                                                                                                                                                                  |
| Ppa2 | Physcomitrella patens | Phytozome 12<br>Pp3c1_1360<br>V3.1<br>Alias<br>Pp1s200_64<br>V6.1 | <p>MSGLSPMYTPQGRRGSPQQRVTPTRSLAREKGKTPPITNSTIGALTTT<br/> TTLAAMGEEAMALMDPLMGSPDMIGVADAVPETEVWKRQFNEGAL<br/> DMPSLERKDRAALHARIAALEALYDYQYNMGLLLLQRKTWTSQADD<br/> LKA AVADAQETLQREKAAHLLLESEVMRREEAAKKALETEKQCVDLE<br/> KALKEFQTDSEVRQAADKQLAQARELVASIEERSVQADLKLAQVQVL<br/> RADANRKLQESELRLQVEAREVALRRERHSLMADVDARKEQVASEE<br/> ASLKEWEKRLEEGRARLQEGERLLNERENSLKQRDEALKQTSRELAETR<br/> SYIENERALIKQTDADLNARVISLSERERTLSERELKILTKEQDLLAEERIA<br/> EQTRFENRELQVKETKEYVEQERARLDDYESALKFQETTLEEQKMELS<br/> EMEALLKIHTSDVDSKKAELLAEEELRSVRKTLAAEKEEVETLKLAAEA<br/> REARSRHLETAITAREEELKLRVQEIVDREDVLNRRLEEVSNLEQGIRVE<br/> EKKYENEHERIAELKEEIRKSKEEMEENKLELQKQIEEEREHLRRECE<br/> LERQEIEEEREKVRKDWEEEREWEQQRLIVQKDVYKKEQLEFEKERL<br/> REELKAEREKQSAELMRVNLHNELEALREKLKAEVEFERDALRKEIET<br/> DQERVAELREESRAIQAREQVDEERSRIRRELEVERQQLAEESERAH<br/> AAIDLERRKIEDEQEKLKALEQERGELVRIQVQLKQEIIDEIRARKQFVDE<br/> EALCLKQKDRFEREWELLDEKREATRKERERFEEESKRMAEWMQDE<br/> EERLKETRRVQEQSRRMTEELQKERESWESRLETERNQLYQLDVER<br/> QALNRNLELQREDLDRRLELERDAFEKQFEEREACLRAEVEQEKEKDLR<br/> NRG SVIGELEQLRAERAKLEKERQELLKQRVDAKEWSEIKKDIEQLQL<br/> QGEKLEQRESLHLERQNTMREAERLQKLREQMKGSEGSMSMRVPE<br/> QPMRMEEEVVSPHPQGLLVRTDTQRAVGGRPAPGTHKPSSSHSSRR<br/> MIARTPSRLAWLQRCASRASLLFSSPTKLLTGQEPVEEEAEEEQVKQDP<br/> NAPSSSFNQSQLGQVEGNIDDGPRFRRTSIRRVVEEANAILGIGVEET<br/> SESNRNRSNADAFTTTTPAESAETRQKKRARGNVDDDDANPLEADAHG<br/> GTQRKKRIKDIMVEIETNEDSLHTPHSRVSTPATKRYNFRPSTIVNMTA<br/> ASENVSPRHHDRTSKKAASATSQPTAAAVDDLPEVISQPQVQETEAHM<br/> EAPAVGETLEAQEEGDAVAESPHSGETTTVRVDHVTETQVVTETTTIVT<br/> ETVKELAVFDLNV EELDMAEIEAEVVPTAEAVHLSRSVELPESGEETA</p> |

|      |                |                                         |                                                                                                                                                                                                                                                                                                                                                                                                                                                                                                                                                                                                                                                                                                                                                                                                                                                                                                                                                                                                                                                                                                                                                                                                                                                                                                                                               |
|------|----------------|-----------------------------------------|-----------------------------------------------------------------------------------------------------------------------------------------------------------------------------------------------------------------------------------------------------------------------------------------------------------------------------------------------------------------------------------------------------------------------------------------------------------------------------------------------------------------------------------------------------------------------------------------------------------------------------------------------------------------------------------------------------------------------------------------------------------------------------------------------------------------------------------------------------------------------------------------------------------------------------------------------------------------------------------------------------------------------------------------------------------------------------------------------------------------------------------------------------------------------------------------------------------------------------------------------------------------------------------------------------------------------------------------------|
|      |                |                                         | GDSPMQAGEVDVGVTLDDSCDDEVEDVDAMEGNDEVEDGEDGAAE<br>NGDNGVAVPENGELLSEEESEAEEGEEASEAEVEESEAESEAVVEEKSE<br>AEVEEDVGEVEDDDENEDTREDDPEDEPDDEGEKPSIRAKIWDFLT                                                                                                                                                                                                                                                                                                                                                                                                                                                                                                                                                                                                                                                                                                                                                                                                                                                                                                                                                                                                                                                                                                                                                                                          |
| Ppe1 | Prunus persica | Phytozome<br>12<br>Prupe.3G240<br>800.1 | MFTPQRWWSGWSLTPKTGAEKTGTGSGSNMKSSTPNFNSGDGVVAK<br>GKGLSLFEPRTPASGSVLENGGNMQVESGEGATDREELAQRVSELENE<br>LFEYQYNMGLLLIEKKEWTSRHEELRQSLTEAKDAVRREQAAHLIAISEI<br>EKREENLRKALGVEKQCVHDLEKALHEIRSENAEIKFTADSKLAEANALV<br>ASIEEKSLELEAKSRAADAKLAEVSRKSSEFERKSKDLEDRESALRRDRLS<br>FNSEQEAHENSLSKRREDLLEWERKLOEGEERLAKGQRILNQREERAN<br>ENDRIFKQKEKDLEDAQKKIDATNETLKRKEDDISRLANLTLKEKEYDT<br>MRINLEMKEKELLALEEKLNARERVELQKIIDEHNAILDAKKCEFELEIDQ<br>KRKSLDDELNRNLVDVEKKESEINHMEEKVAKREQALEKKGKVKREKEK<br>DFESKMKSLKEKEKSISEEKDLESEKKQLIADKEDLVRLLAEVEKIRANN<br>EEQLKISEEKDRLKVSEEEKSEYHRLQSELKQEIDKYMQQKELLKEAE<br>DLKQQKELFEREWEELDDKRAEIEKELKNVNEEQKEEVEKWKHVEEERL<br>KSEKVMQAQDHIQREQDDLKAKESFEAHMEHEKSVLDEKAQSERSQ<br>MLHELETRKRELEIDMQNRLEEMEKPLREREKSFEEERERELDNVNYLR<br>EVARREMEEIKVERLKIEKEREADANKEHLERQHIEIRKIDIDELDLSQK<br>LRDQREQFIKERESFISFIEKFKSCTNCGEMISEFVLSNLRPLAEIENAEVI<br>PPRGLGDDYLKGGFNENLAQRQNNESLIGIDSRSPVSGGTISWLRKCTS<br>KIFNLSPGKKIEFGSPQNLANEAPFSGEQNVEASKRGCGIENEAELSGF<br>VASDSFDVQRVQSDNRIREVEAVQYSPDEHSNMNSEAPDLPEDSQP<br>SDLKGGCQKPSRRGRRRPAVKRTRSVKAVVKDAKAILGEAFETNDS<br>EYANGTAEDSVDMHTESHGGSSLADKRSARNGRKRGRAQTSQIAVSG<br>GDDSEGRSDSVMGAQRKKRREKVIPAEQAPGESRYNLRPKTGVTVA<br>AASASRDLVKDNEEEVDNARATEHYSKAAPATSIGVGSSENGGSTHFVR<br>CGTLGDTQDGEADAIGNLEENTAVSEEVNGSTEGGQYVDGDEYRSES<br>QNGTPIEEDDDDEESEHPGEASIGKKLWTFFT |
| Ppe2 | Prunus persica | Phytozome<br>12<br>Prupe.6G214<br>100.1 | MASPOSELFARTPGSGRALSITPGARILQSPFSDEAIWKRLKEAGFDEES<br>IKRRDKAALIAYIAKLEAEIFDHQHHMGLLIMERKELASKYEEVKASNET<br>TELLHKRDQAAYVSALAEARKREECLKKVVGVKEECISSIEKSMHEMRA<br>ESAETKVAESKLAEARNMVEGAQKFKFTEAEAKLHVAESLQAEASRFH<br>RVAERKMQEVEAREDALRRNLSFKTDCDTKEKEISLERQSLCERQKTL<br>QQEQDRLLDAQALLNQREDFIFGRSQELNRLEKELEDVKANIEKERRAL<br>DDGKLNLELTEASLVNREEALTRREALLNKKEQEILVLQEKLVSKESDEIR<br>KALASHEVELRKKKFEFDSELDVKKRLFEDIEAKRRAWELREVDLNQR<br>DDLQEREHDLEVQLRTLVDREKDVAEMSNLVDEKEKTLRDAEKEFEL<br>NNVLLQREKEEIIKMKVELQCSLDSLEDKRRQLDCAREKFEVLKTETSEL<br>SDLEMKLKEEIDLVRAQKQELMAEADKLAVEKAKFESEWELIDEKREEL<br>QKEAEHVAEERLAFSKFIKDEHDNLRQEKEEMRDQHKRDVELLVSERE<br>DFMNKMOVHERSEWFGKMQKERADFLLEIEMRKRELENCIDKKHEELE<br>CSLKEKEIAFEQEKNEFQINSLKEEAAKEREQVALERKRLETERIEINL<br>DRERRDREWAE LNNSIEELRVQREKLKEQRELLHADREEILGQIQHLKE<br>LESKKAALDSASVSEMQQSDLVPRSRKTSRRYLKQLTSVREADHNSHN<br>EENVANISNSSIMLKSGFSPSSARFSWLKRCRELLFKQSPEKHQTEYEE<br>NHVISREETSLTVTEQVDTSSKYDGHRYTGNGNSPRFFSKRQNAFGEP<br>KVIVEVPFVGETVKGHTHESEIKFDGESCSPLISEHVCQGGRKRRVDKS<br>LSNDGFDPLLEPRQNLKRRRQQDATVNSSEHANTHCIVSTQEKVLED<br>QNISMPLPSDQICEGAEESALIVDKIIVSEVIFEETGTGSLGNEGKLEA<br>QNSIVEAHHGQNGVFGAVGQVTEHCQIQAEEDTSAKHVQSQ                                                                                                                                                 |
| Ppe3 | Prunus persica | Phytozome                               | MMFTPQRKALNAQSLTPRSGAVVSNPRTAGKGVAVFVDGPPPLG                                                                                                                                                                                                                                                                                                                                                                                                                                                                                                                                                                                                                                                                                                                                                                                                                                                                                                                                                                                                                                                                                                                                                                                                                                                                                                  |

|      |                  |                                     |                                                                                                                                                                                                                                                                                                                                                                                                                                                                                                                                                                                                                                                                                                                                                                                                                                                                                                                                                                                                                                                                                                                                                                                                                                                                                                                                            |
|------|------------------|-------------------------------------|--------------------------------------------------------------------------------------------------------------------------------------------------------------------------------------------------------------------------------------------------------------------------------------------------------------------------------------------------------------------------------------------------------------------------------------------------------------------------------------------------------------------------------------------------------------------------------------------------------------------------------------------------------------------------------------------------------------------------------------------------------------------------------------------------------------------------------------------------------------------------------------------------------------------------------------------------------------------------------------------------------------------------------------------------------------------------------------------------------------------------------------------------------------------------------------------------------------------------------------------------------------------------------------------------------------------------------------------|
|      |                  | 12<br>Prupe.1G303<br>700.1          | <p>SLSESGPKTIPDFDTGDMDDWRRFKEVGLLNEAAMERKDRQALADKV<br/> SKLQKELYDYQYNMGLLLIEKKEWALKHEELGEALAEQEIHKREQSAH<br/> LISISEVEKREENLRKVLVAEKQCVAELEKALREMHEEHAQIKLKSEAKLA<br/> DANSLVVGIEEKSLETDAKFLAAEANIAEVNRKSTELEMRLQVEVARES<br/> VLRREHLSLSAEREAHKKTFFYKQREDLQEWERKLQEGEERLCKLRRILN<br/> EKEEKANENDLIMKQKEKELDEVQKKIELSNTILKEKKADVNRKRLADLVS<br/> KEKEADSVGKIWELKEKELHELEEKLSRENAEIEQVLDKQRALCNTKM<br/> QEFELEMEERRKSLDKELSGKVEVVEQKELKINHREKLLKQEQALHEK<br/> SERLKEKNKELETSKNLKENEKTIVNEEMLEVERQQVLADLESFQNL<br/> KEEIQKIKDENVQLELQIREEREKLVITQEERSEHLRLQSELQQEIKTYRL<br/> QNELLSKEAEDLKQREKFEFEWENLDERKAEISRGLEKIVEEKEKLEKL<br/> QGTEERLKEEKHAMQDYIKRELDNLNLEKESFAAKMRNEQFAIAEKA<br/> QFQHSQMVQDFESQKRELEVDMQNRQQEMEKHLQEMERAFEEEEK<br/> DREYTNINFLKEVAEKKSEELRSEKYRMEKEREELALNKKQVEVNQLEM<br/> RKDIDQLAMLSKKIKHQREQLIEERGRFLAFVEKIKSCKDCGEMTREFVL<br/> SDLQVPGMYHHIEAVSLPRLSDEFKNSQADLSAPDLEYPESGWGTSLL<br/> RKCKSMVSKVSPIKKMEHITDAVSTELPPLSTMKVNEGARGHIGHEDE<br/> PEPSFRMPNDASIQPLPSDNTTKEVDDGYAPSIDDHFSIDSKVKDVPD<br/> DSEQSELKSYQCKPGRGRKSRLSRTRTVKATVEEAKIFLRTLEEPSNAS<br/> MLPNDSSNIHEESRGDSSFVEKANTSIGRKRRAQSSRITESEQDDCDS<br/> EGRSGSVTTAGGRRRKRQSIASSVQAPGEQRYNLRHRKTAGSVTAAP<br/> AAADLKRRRKEEAGGGGAEPNPESVSSLGMAGETGQTAQLMQVTTS<br/> KSVEFSQERVVRFSTPEDIVDGNAAADAAKTVENTELSGEDNGTPESGS<br/> GNNTVGESDDDYDDEERPGEASIRKKIWNFLT</p> |
| Ppr1 | Pinus_parviflora | onekp:IIOL_s<br>caffold_2016<br>483 | <p>DRAALVVHVTKLEALYDYQYNMGLLLIERKDWTSKYEQMKVAIAEAE<br/> ENLKREQSAHLIAISEAEKREESLKKALGVEKQCVMDLENALHEMRAE<br/> MAELKFTSENKLAQAREFAASTEELKALAAESKFHAAEALQAEVSRKLAE<br/> MERKGQDIEALERTLQRRERQSFMSHDAFESELSERQNLLEWEKKLQ<br/> EGQERLIEGQRLLNQREYINRRDEAMKQIEKELADAKMQIEKDQATL<br/> KEKEVDISVRMAALAAREEDVAKGETVIKEKEEELYALQEKLVSMENEEI<br/> QKLIDDHKATLEARKTEFEAEIEQKKMLVEEELEKKRSDVELMEANMN<br/> RKEEKISKREQQLEKKAKEVKEKEKEVDARSKALKEREKTYKNEEKQIET<br/> EKKKLEAENEDLNNDKQELEKLRILKEEKQQILNAQENLKVTEKERNEL<br/> LKLQTELKEEENYRSRQKQVENEAEELRLEREKFEREWEILDEKREQAR<br/> KESAQVDEDRKRISKWVQEEEEERLQEKRALREHIQSDSDALNLEKEAF<br/> KSSMEHERAEWFENVRERADILRDIELQRSELENSIEKRKEEIERLLHE<br/> KEVEFQKEKEREMHHICELREVARKEEMEMKVERRKLEKERQEIIESRE<br/> HAEKEWTGIKKDIEELQVQREKLKEQRQSLCKEREVLRLEQLKLLKTE<br/> LNVTEHHLKQIADKDGSHSPRPADALGFHQALGNIFGTPVDTSVKV<br/> NPEPSSGRTDASSKTSRLSWLQKASKIFNQLPSPGKVG DSTVVGKEET<br/> EISYSPALEVDLGAEVERMTHENIVGEKVEHGSLADVQNDGLTVEAAQ<br/> DNRQGPGRVKPRPVVNFSSLPSPSAGNGHKS KDKAKIRVFRTRSM<br/> KAVVEEAKGILETPLDMEKNESEDGQEQEQNDAEVTANSEDLGKESD<br/> KDKSDTAKEIDESKGESLASDKKPSQSGKKRRRKYSSRATSAQDADDA<br/> DVQSELTSQRRKKRQRDNANGDKSIGITPGGKRYNLRR</p>                                                                                                                                                                  |
| Ppr2 | Pinus_parviflora | onekp:IIOL_s<br>caffold_2016<br>481 | <p>SSVNENEMWKRLREVGLDEETLQKKDKAFLVAYITKLESELYDYQCNM<br/> GLLLIERKEWTSKYEQMKLSASEAEKFRERAAALSTAIQAEQKQEEESLK<br/> KALGVEKQCVADLEKALHEIRAECALKFISDNKLAQAREMVAATEEFK<br/> LAAESKLHAGEALQAESNRKKADAERKLQVEVAREDALRRERQAFKSE<br/> CESREKELVLERQNLRGWDKQLQEGQERLLEGQKFLNQRQAHLMERD<br/> EALKQSEKELQGLKINVEKEHSTLKEKEAELRTSLAALMTREEAVVKQEV</p>                                                                                                                                                                                                                                                                                                                                                                                                                                                                                                                                                                                                                                                                                                                                                                                                                                                                                                                                                                                                   |

|      |               |                                     |                                                                                                                                                                                                                                                                                                                                                                                                                                                                                                                                                                                                                                                                                                                                                                                                                                                                                                                                                                                                                                                                                                                                                                                                                                                                                                                                                                                                                                                          |
|------|---------------|-------------------------------------|----------------------------------------------------------------------------------------------------------------------------------------------------------------------------------------------------------------------------------------------------------------------------------------------------------------------------------------------------------------------------------------------------------------------------------------------------------------------------------------------------------------------------------------------------------------------------------------------------------------------------------------------------------------------------------------------------------------------------------------------------------------------------------------------------------------------------------------------------------------------------------------------------------------------------------------------------------------------------------------------------------------------------------------------------------------------------------------------------------------------------------------------------------------------------------------------------------------------------------------------------------------------------------------------------------------------------------------------------------------------------------------------------------------------------------------------------------|
|      |               |                                     | <p>IVDRKEQELLVLQEKLANREREEIQRLTDEHKATLEAIRIEFEAELEQKRR<br/> LVEDELENKENAADLRVLEIDRKEEKLSKRELHLEMKAEKLEKENELEL<br/> RSRTLKEMEKTYKTEEKEMEKEKKKLEMERKEINNAKQELQKFKASLEG<br/> ERCQILKEQQRLELTKNERDELDDLQTRLKEEIDDLRAQKHELLKEADEL<br/> DVEKEKFEREWEILDEKREQLRKELEWVDDERKKVPKWLKDEEERLKQ<br/> EKIVLREEIKRDAEGLRLEKEAFESSMQHQRAVLFAEVQRERADLVQDI<br/> ELRTRELENSIERRREELERHYQEKEASFQKEKDKEMQYISAQRELLRKE<br/> TEEIKSGRQRLERERKEITTNQEHEKEWSEMKKDIEELQIQREKLKEQR<br/> ELLHREEREELRAQLEELKLLKDELKMTESLKFSEQQLSQVNINECEVISP<br/> GHGISWAAPKQNVFAVPENANIEFNSGISPVRTPPSASTPSPLTWLQK<br/> CASRIFKPSPGKEAESIFQKQETERAEN</p>                                                                                                                                                                                                                                                                                                                                                                                                                                                                                                                                                                                                                                                                                                                                                                                                                                            |
| Pra1 | Pinus_radiata | onekp:DZQM<br>_scaffold_20<br>56498 | <p>MLTPKRRGWPGWSPKTPPPPAEDMAGSSHVATPAATAGGNSGGR<br/> ALVEAPPRNLLDNNGEIVATRGEPEIWRRFKEAGSLDEESLEKKDRAAL<br/> VVHVTKLEAELYDYQYNMGLLLIERKEWTSKYEQMKAIAEAEENLKR<br/> EQSAHLIAISEAEKREESLKKALGVEKQCVMDLENALHEMRAEMAELK<br/> FTSENKLAQAREFAASTEELKALAAESKLHAAEALQAEVSRKLAEMERKG<br/> QDIEALERTVQRERQSFMSEHDAFESELSLERNLLEWEKKMQEGQE<br/> RLIEGQRLNQREEYINKRDEAMKQIEKELADAKMQIEKHQATLKEKEA<br/> DISVRMAALAAREEDFAKREAVIKEKEELHALQEKLVS MENEEIQKLID<br/> DHKATLEARKTEFEAEIEQKKMLVEEELEKRSDIELMEVNINRKEEKIS<br/> KREQQLEKKAIEKVEKEKEVDARSKSLKEREKTYKNEEKQIETEKRL<br/> EAEENNEKQELQKLRIILKEEKQILNAQENLKVTEKERNELLKLQTELK<br/> EEIENYRSRKQVENEAEELRLEREKFEREWEILDEKREQARKESAQVD<br/> EDRKRISKWVQDEEERLKQEKRALREHIQSDSDALNLEKEAFKSSMEHE<br/> RAEFVFNRRERADLLRDIELQRSELENSIEKRKEEIERLLHEKEVEFQKE<br/> KEREVQHICEQREVARKEMEEMKVEKRKLEKERQEISESREHAEKEWT<br/> GIKKDIEELQVQREKLKEQRQSLCKEREVLRFLDQLKLLKMLNVTED<br/> HLKQIADKDGSHSPRPADALGFHQALGQNFQVDTSLKVNPEPSS<br/> GRTDASSKASRLSWLQKCAKIFNQSPSPGKVGVDSTVGN EETERSHS<br/> PALEVVLGAEVERMTHENIVGEKVEHGSSADVQNDGFTVEDAQGNR<br/> QGPVKVPRPVVNFSSLPSPSAGNGHKS KDKAKIRVFRTRSMKAV<br/> VEEAKGILETPLDMEKNESEDGQEQEQNDAAVTANSEDLGKESDKDK<br/> SDTAKEIDESKEESLASDKKPSQSGKKRRRKYSSRATSQAQDAEDADVQS<br/> ELTSGQRRKKRQRDNANGANSVGTGGKRYNLRSTIASTIAAQAQVS<br/> LEDKDKDLTTQEEEDSRVQENLLDHVTEDNQEASSDEPARAPSAGER<br/> DTNILPAEDQDPQTFQENGLDAGNDLREVSSHELTKSETAEFYAESE<br/> DEGGNGVDIEELDEDEDGEEIEVDEDGNDDAEDQKSSLRKKLWNFLT<br/> T</p> |
| Pra2 | Pinus_radiata | onekp:DZQM<br>_scaffold_20<br>12000 | <p>SPVNEEMWRRRLREVGLDEETLQKKDKAFLVAYITKLESELYDYQCNM<br/> GLLIERKEWTSKYEQMKL SASEAEKFKRERAAALSTAI AEAKEQEE<br/> KALGVEKQCVADLEKALHEMRAECAELKFISDNKLAQAREMVAATEEK<br/> FLAAESKLHAGEALQAEANRKKADAERKLQEVEAREDALRRERQAFKS<br/> ECESREKELVLERQNLRGWDKLLHEGQERLLEGQKFLNQREAHLMER<br/> DEALKQIEKELQDLKMNVEKEHSTLKEKEAELRTSLAALMTREEAVVKQ<br/> EVIVDRKEQELLVLQEKLASREREEIQRLTDEHKATLEAIRIEFEAELEQK<br/> RRLVEDELENKENAADLRVLEIDRKEEKLSKRELHLEKKAEKLEKENELE<br/> LSRTLKETEKSYKTEEKEMENEKKNLEMERKEINNAKQELQKFKASLE<br/> DERCQILKEQQRLELTKNERDELDDLQTKLKEEIDDLRAQKQELLKEADE<br/> LNVEKEKFEREWEILDEKREQLRNELEWVDDERKKVPKWLKDEEERLK<br/> QEKIVMREELKRAEGLRLEKEALESSMQHQRAVLFAEVQRERADLVR<br/> DIELRTSELENSIERRREELERHYQEKESSFLKEKDKIEILYISAQRELLHKT</p>                                                                                                                                                                                                                                                                                                                                                                                                                                                                                                                                                                                                                                                                                                               |

|      |                  |            |                                                                                                                                                                                                                                                                                                                                                                                                                                                                                                                                                                                                                                                                                                                                                                                                                                                                                                                                                                                                                                                                                                                                                                                                                                                                                                                                                                                                |
|------|------------------|------------|------------------------------------------------------------------------------------------------------------------------------------------------------------------------------------------------------------------------------------------------------------------------------------------------------------------------------------------------------------------------------------------------------------------------------------------------------------------------------------------------------------------------------------------------------------------------------------------------------------------------------------------------------------------------------------------------------------------------------------------------------------------------------------------------------------------------------------------------------------------------------------------------------------------------------------------------------------------------------------------------------------------------------------------------------------------------------------------------------------------------------------------------------------------------------------------------------------------------------------------------------------------------------------------------------------------------------------------------------------------------------------------------|
|      |                  |            | EEMKSERQRLEKERKEITTNQEHTEKEWSEMKKDIEELQIQREKLKEQR<br>ESLHSEEREELRAQLEELKKLDELKMTTEESLKVFSEQQFSQVNINEKFLLR<br>MVFLKRHLNRMFLLCQRMQTLSSGISPVRRTPPSASTPSPLAWLQKCA<br>SRIFKPSPGK                                                                                                                                                                                                                                                                                                                                                                                                                                                                                                                                                                                                                                                                                                                                                                                                                                                                                                                                                                                                                                                                                                                                                                                                                    |
| Psy1 | Pinus sylvestris | GymnoPlaza | MLTPKRRGWPGWSPKTPPPPAEDMAGSSHVATPAATAGGNSGGR<br>ALVEAPRNLLDNGEIVATRGEPEIWRRFKEAGSLDEESLEKKDRAAL<br>VVHVTKLEAELYDYQYNMGLLIERKEWTSKYEQMKVAIAEAEENLKR<br>EQSAHLIAISEAEKREESLKKALGVEKQCVMDLENALHEMRAEMAELK<br>FTSENKLAQAREFAASTEELKALAAESKLHAAEALQAEVSRKLAEMERKG<br>QDIEALERTVQRERQSFMSEHDAFESELSLERNLLDWEKKMQEGQE<br>RLIEGQRLNQRREYINKRDEAMKQIEKELADAQMQIEKHQATLKEKE<br>ADISVRMAALAAREEDFAKRETVIKEKEEELHALQEKLVSMENEEIQKLI<br>EDHKATLEARKTEFEAEIEQKMLVEEELEKKRSDIELMEANINRKEEKIS<br>KREQQLEKKAKEVKEKEVEVDARSKSLKEREKTYKNEEKQIETEKKLEA<br>EREDINNEKQELQKLRIILKEEKQQLNAQENLKVTEKERNELLKLQTEK<br>EEIENYRSRKQQVENEAEELRLEREKFEREWEILDEKREQARKESAQVD<br>EDRRISKWVQDEEERLKQEKRALREHIQSDSDALNLEKEAFKSSMEHE<br>RAEFENVRERADLLRDIELQRSELENSIEKRKEEIERLLHEKEVEFQKE<br>KEREVQHICEQREVARKEMEEMKVERRKLEKERQEISESREHAEKEWT<br>GIKNDIQELQVQREKLKEQRQSLCKEREVLRFLDQLKKLMELNVTED<br>HLKQIADKDGSHSPRPADALGFHQALGQNIQFTVDTSLKVNPEPSS<br>GRTDASSKTSRLSWLQKCASKIFNQSPSPGKVG DSTVGN EETERSHSP<br>ALEVVLGAEVERMTHENIVGEKVEHGSSADVQNDGFTVEAAQGNRQ<br>GPGKVKPRPVVNFSSLPSPSAGNGHKS KDKAKIRVFRTRSMKAVVE<br>EAKGILETPLDMEKNESEDGQE QEQNDAAVTANSEDLGKESDKDKSD<br>TAKEIDESKEESLASDKSSQSGKKRRRKYSTRATSQAQDAEDADVQSEL<br>TSGQRRKKRQRDNANGANSVGTGPGGKRYNLRSTIASTIAAQAVSL<br>DDKDKDLTTQEEEDSRGVQENPLDHVTEDNQEASSDEPARAPSAGER<br>DTNILPAEDQDPQSFQENGLGDAGNDLREVYSHELKSETAEFYAESED<br>EGGNGVDIEELDEDEDGEEIEEVEDGDND AEDQKSSLRKKLWNFLT |
| Psy2 | Pinus sylvestris | GymnoPlaza | MLSPQRTGWRSPVSPSTDGKEKNKGIVVAAASPEVRSPVSANRGSPV<br>NENEMWRRLEVLDEETLQKKDKAFLVAYITKLESELYDYQCNMGLL<br>LIERKEWTSKYEQMKLSASEAEKFRERAAALSTAI AEAEKQEE SLRKAL<br>GVEKQCVADLEKALHEMRAECAELKFISDNKLAQAREMVAATEEKFLA<br>AESKLHAGEALQAEANRKKADAERKLQEVEAREDALRRERQAFKSECE<br>SREKELVLERQNLRGWDKKLHEGQERLLEGQKFLNQREAHLMERDEA<br>LKQIEKELQDLKMNVEKEHSTLKEKEAELRTSLAALMTREEAVVKQEVI<br>VDRKEQELLVLQEKLASREREEIQLTDEHKSTLEAIRIEFEAELEHKRRL<br>VEDELENKENAADLRVLEIDRKEEKLKRELHLEKKAELKEKENELELRS<br>RTLKETESYKTEEKEMENEKKNLEMERKEINNAKQELQKFKASLEDER<br>CQILKEQQRLELTKNERDELDDLQTKLKEEIDDLRAQKQELLKEADELNV<br>EKEKFEREWEILDEKREQLRNELEWVDDERKKVPKWLKDEEERLKQER<br>IVLREEIKRDAEGLRLEKEALESSMQHQRAVLFAEVQRERADLVRDIELR<br>TSELENSIESRREELERHYQEKESSFLKEKEKEILYISAQRELLHKETEDLKS<br>ERQRLEKERKEITTNQEHTEKEWSEMKKDIEELQIQREKLKEQRESLHSE<br>REELRAQLEELKKLDELKMTTEESLKVSEQQLSQVNINECEVISPEHGIS<br>QAAPKQNVFAVPENANIEFNSSGIVRTPPSASTPSPLTWLQKCASRIF<br>KPSPGKDVESIFQKQETERAENLVSARVPGAWIDSVPSAGRQNNNLVE<br>NSKNASEQVDGTLYSRPVMNINQSETSFLGGNKGNKANAGNLRVFRR<br>TRSINAVAQEAKEILEMPSERDNNESDHVKETVHETILNSTGNGDITLN<br>AEEAMRHKENSATEIDEEREDSIDNGKKNLHSGRKRHRHRYSSRDTSEH                                                                                                                                                                                                                                              |

|      |             |                                        |                                                                                                                                                                                                                                                                                                                                                                                                                                                                                                                                                                                                                                                                                                                                                                                                                                                                                                                                                                                                                                                                                                                                                                                                                                                                                                                                                                                              |
|------|-------------|----------------------------------------|----------------------------------------------------------------------------------------------------------------------------------------------------------------------------------------------------------------------------------------------------------------------------------------------------------------------------------------------------------------------------------------------------------------------------------------------------------------------------------------------------------------------------------------------------------------------------------------------------------------------------------------------------------------------------------------------------------------------------------------------------------------------------------------------------------------------------------------------------------------------------------------------------------------------------------------------------------------------------------------------------------------------------------------------------------------------------------------------------------------------------------------------------------------------------------------------------------------------------------------------------------------------------------------------------------------------------------------------------------------------------------------------|
|      |             |                                        | NTEVVEIECELTSGGHRKRHRQRETTNSPGLPTPNGKRYNFRDSTIGNMI<br>APRMASAERKDKDASHGEEQDPKNPVENNLDVSEQEPQEVLYHYKLT<br>SSVAEVKFKVLPHGKQLSKRPRQKTLEEFGGELLEGYARELTRVPDSR<br>GDEEDQEAYSHELTMSSETGELFDESNENEDNNDDDAETFAQTEQDDE<br>DDDEEQKSLKAKLWNFLT                                                                                                                                                                                                                                                                                                                                                                                                                                                                                                                                                                                                                                                                                                                                                                                                                                                                                                                                                                                                                                                                                                                                                          |
| Pte1 | Pinus taeda | Congenie.org<br>IcI PITA_000<br>037238 | MLTPKRRGWPGWSPKTPPPPAEDMAGSSHVATPAATAGGNSGGR<br>ALVEAPPRNLLDNNGEIVATRGEPEIWRRFKEAGSLDEESLEKKDRAAL<br>VVHVTKLEAELYDYQYNMGLLLIERKEWTSKYEQMKAAIAEAEENLKR<br>EQSAHLIAVSEAEKREESLKKALGVEKQCVMLENALHEMRAEMAELK<br>FTSENKLAQAREFAASTEELKALAAESKLHAAEALQAEVSRKLAEMERK<br>QDIEALERTVQRERQSFMSHDAFESELSLERQNLLEWEKMQEQE<br>RLIEGQRLNQREEYINKRDEAMKQIEKELADAKMQIEKHQATLKEKEA<br>DISVRMAALAAREEDFAKREAVIKEKEEELHALQEKLVS MENEEIQKLID<br>DHKATLEARKTEFEAEIEQKKMLVEEELEKRSIELMEVNINRKEEKIS<br>KREQQLEKKAKEVKEKEVEVDARSKSLKEREKTLKNEEKQIETEKRL<br>EREDINNEKQELQKLRIILKEEKQILNAQENLKVTEKERNELLKLQTE<br>EEIENYRSRQQVENEAEELRLEREKFEREWEILDEKREQARKESAQVD<br>EDRRISKWVQDEEERLQKQKRALREHIQSDSDALNLEKEAFKSSMEHE<br>RAEFENVRERADLLRDIELQRSELENSIEKRKEEIERLLHEKEVEFQKE<br>KEREVQHICEQREVARKEMEEMKVEKRKLEKERQEISESREHAEKEWT<br>GIKKDIEELQVQREKLKEQRQSLCKEREVLRFLDQLKLLKMLNVTED<br>HLKQIADKDGSHSPRPADALGFHQALGQNFQVDTSLKVNPEPSS<br>GRTDASSSKASRLSWLQKCAKIFNQSPSPGKVG DSTVGN EETERSHS<br>PALEVVLGAEVERMTHENIVGEKVEHGSSADVQNDGFTVEDAQGNR<br>QGGPKVKPRPVVNFSSLPSPSAGNGHKS KDKAKIRVFRTRSMKAV<br>VEEAKGILETPLDMEKNESEDGQEQEQNDAAVTANSEDLGKESDKDK<br>SDTAKEIDESKEESLASDKKPSQSGKKRRRKYSSRATSQAQDAEDADVQS<br>ELTSGQRRKRQRDNANGANSVGTGPGKRYNLRSTIASTIAAQTVS<br>LEDKDKDLTTQEEEDSRRVQENPLDHVTEDNQEASSDEPARARSAGER<br>DTNILPAEDQDPQSFQENGLDAGNDLREVSSHELTKSETAEFYAESE<br>DEGGNGVDIEELDETEDEGEEIEVDEDEDGNDDAEDQKSSLRKKLWNFLT<br>T |
| Pte2 | Pinus taeda | Congenie.org<br>IcI PITA_000<br>013513 | MLSPQRTGWRSPVSPSTDGKEKNKGIIVAAASPEVTSPVSANRGSPVN<br>ENEMWRRRLREVGLDEETLQKKDKAFLVAYITKLESELYDYQCNMGLLI<br>ERKEWTSKYEQMKLSASEAEKFKRERAAALSTIAEAEKQEEESLKKALG<br>VEKQCVADLEKALHEMRAECAELKFISDNKLAQAREMVAATEEKFLAA<br>ESKLHAGEALQAEANRKKADAERKLQVEVEAREDALRRERQAFKSECES<br>REKELVLERQNLRGWDKLLHEGQERLLEGQKFLNQREAHLMERDEAL<br>KQIEKELQDLKMNVEKEHSTLKEKEAELRTSLAALMTREEAVVKQEVIV<br>DRKEQELLVLQEKLASREREIQLRTDEHKATLEAIRIEFEAELEQKRRLV<br>EDELKENAADRVLVLEIDRKEEKLSKRELHLEKKAELKEKENELELRSR<br>TLKETESYKTEEKEMENKKNLEMERKEINNAKQELQKFKASLEDERC<br>QILKEQQRLELTKNERDELQTLKKEIDDLRAQKQELLKEADELNVE<br>KEKFEREWEILDEKREQLRNELEWVDDERKKVPKWLKDEEERLQKEKI<br>AMREELKRDAEGLRLEKEALESSMQHQRVLFVAEQRERADLVRDIEL<br>RTSELENSIERRREELERHYQEKESSFLKEKDKEILYISAQRELLHKETEEM<br>KSERQRLEKERKQITTNQEHEKEWSEMKKDIEELQIQREKLKEQREAL<br>HSEREELRAQLEELKLLKDELKMTTEESLKFSEQQLSQVNINECEVISPEN<br>GISQAAPKQNVFAVPENANIEFNSGISPVRTPPSASTPSPLAWLQKCAS<br>RIFKPSPGKEVESIFQKQETERAENLVSARAPGAWIDPVPSAGRQNNN<br>LVENAKNASEQVDGTLYSRPMNINQSETSFLGGNKGKADAKGNLVR                                                                                                                                                                                                                                                                                                                                                             |

|      |                        |                                           |                                                                                                                                                                                                                                                                                                                                                                                                                                                                                                                                                                                                                                                                                                                                                                                                                                                                                                                                                                                                                                                                                                                                                                                                                                                                                                |
|------|------------------------|-------------------------------------------|------------------------------------------------------------------------------------------------------------------------------------------------------------------------------------------------------------------------------------------------------------------------------------------------------------------------------------------------------------------------------------------------------------------------------------------------------------------------------------------------------------------------------------------------------------------------------------------------------------------------------------------------------------------------------------------------------------------------------------------------------------------------------------------------------------------------------------------------------------------------------------------------------------------------------------------------------------------------------------------------------------------------------------------------------------------------------------------------------------------------------------------------------------------------------------------------------------------------------------------------------------------------------------------------|
|      |                        |                                           | FRRTSRINAVVQKAKEIVEVPSERENNESDHVKEPVHETLLNSTGNGDT<br>TLNAEEAMGHKENSATEIDEEREDSIDNGKKNLHSGRKRHRHRYSSQDT<br>SEHNTEVVEIECELTSGGHRKRHQRETTNSPGMETPNGKRYNFRDSTI<br>GNMIAPRMASAECKDKDVSHGEEQDPKNLVENNLDKVSQEPQEV LH<br>YKLTKSSVAEVKFKVLPHGKKQISKRPRQKTLEEFGGELLEGYARELTRV<br>PDSRGDEEDQEAYSHELTMSSETGELFDESNENEDNNDDDAETFAGTE<br>QDDEDDDEEQSLKAKLWNFLT                                                                                                                                                                                                                                                                                                                                                                                                                                                                                                                                                                                                                                                                                                                                                                                                                                                                                                                                               |
| Ptr1 | Populus<br>trichocarpa | Phytozome<br>12<br>Potri.017G11<br>1400.1 | MFTPQKKVWSGWSLTPRSEAGQKNGSESGSDPKGKSVGFVEQVTPN<br>GVRPNLDGEYLADKVSLENELFEYQYNMGLLLIEKKEWGSKHEELMQ<br>AFAEATEAVKREQAALIALSDAEKQEENLRALGVEKQCVLDLEKAVR<br>EMRSENADIKFTADSKLAEANALVMSIEKSLEVEAKLRAADAKLAEVS<br>RKSSEIQRKLLDVESRESALRRERLSFIAEKEVYETTFQKQREDLQEWK<br>LQEGEERLSKSQRIINQREERANENDRILKQKEKDLEEAQKKIEDANSIL<br>KRKEDDISNRLTNLTIKEKFDATRKKLEVKEVELRVLEEKLNERRERVEIK<br>KLTDEHNAILDVKKHEFELEAEQKKKSLDEDLKNKVIELEKRETEINHKEE<br>KAAKREQALDKKLEKCKEKENEFESKSKSLKEREKAIKSEQKNLEGEKNQ<br>LESAKENFLNLKAELEKTRASNEEQLLKIHEEKERLKVSEERSEYARLQA<br>ELKEEINKCRLQEELLKEADDLQKQGNFEREWEDLDEKRAEAEKELK<br>SIHEQKEKFEKYRLSEERIRNERKETENYIKRELEALQVAKESFEANME<br>HERSVMAEKAQNERNQMLHSIEMQKTELENELQKRQEEMDRLLQEK<br>EKLFEEREREFKNINFLRDVARREMEDMKLERLRIEKEKQEVDEKRRH<br>LQEQQIEMREDIDKGNLSRKLKDHREQFIKEKERFIVFVEQNKGCKNC<br>GELTSEFVLSDLISSQIEKADALPTSCLVNNHVTTDDGNPAASEKHDSE<br>MSPTLAHSVSPVSWLRKCTSKILKFSAGKRIEPAALQNLTDGTPLSGEQ<br>VNAEEMSKRLDFTENEPESFAIVNDSLDAQRVLSDTISIREVEAGHDLSI<br>NDQSNNGTAPEIQEDSQPSGLKHDPQPRKRGRPRVSRTRSVKEVVQ<br>DAKALLGGALELNEAEDSGHLKSESDESSLADKGGPRNARKRNRTQT<br>SQISVSDRYGDDSEGHSDSVTAGDRRKRQKQVVPNQQTGGQTQYNLR<br>RRKLGAVVTVKASSNLNNEKEKEDDGVSSPDGNLLRSAPAASAGA<br>ASENGESMHFARCANIMDTLDGDGSARRMDENAALSEEINGTPEGA<br>GEYGIADENRSETPRGENEDEDEDDDEEESLHPGEVSIGKKLWTFLLT |
| Ptr2 | Populus<br>trichocarpa | Phytozome<br>12<br>Potri.012G03<br>4300.1 | MTSPITPSNGSGRALSLSAIVLKTPLTDEKIWKRLKEAGFDEESVKRR<br>DKAALIAIANLEAEMFDLQYHMGLLILEKKEWTSKYDQMKSSAETAD<br>LMRRRDQASHLSALAEARKREESLKKALGVEKECISSEKALHEMRAE<br>SAETKVAADSKLSEARDMVQDAQKFLDAEAKLHAAEALQAEASRYH<br>RAAERKLQVEAREADLSRRMTAFKTDCAKEKEIGLERQSLSERRKVL<br>QQEQESLLDGQALLNQREDYVANKSQDLNQLKQVLEVSKENIEKELRA<br>LNDEKSKLELTIASLSQREEAVIEREAQLSKREQELLVFQEKASKELVEIQ<br>KVTASHENVLRTMNSEFEAELDKRKLVEDEIEAKRRRAWELREVDLKQ<br>REDLVLEKEHDLEVQSRALVDKEKDVTDKINFLDDKERSLNVVEKDIELR<br>RALLQEREINKTKLDLQKSLDSLEDKQVDCAKEKLQTMSETNEY<br>AALEMKLKEEVDTLRAQKLELVDEEDRLKNEKGFETEWELIDEKREEL<br>RKEAERVAEEREAVSRLLKEERDSLREKKEIRDQHKKDVESLNHEREDF<br>MINKMEQERSEWFRNIQKEHSDFLGIEMQKRELESSIDKRREEIESYL<br>DKEKAFELEKSELQHIASLREKAEKELEQVTLEMKKLDAERMEINLDRE<br>RRDGEWAMLNKSIEELKGQTQKLEKQRQLRGEREEIYVQIEQLKKLD<br>NLKLALDDMEMEEMQLSNMESSRQKISTIRRLKQQTTVQDLDASYG<br>KVDAASNVGGLNSPTPKTSVASPTNSARFSWIKRTELVFKN SPEKPS<br>RSEESGMSGHEDTSLTAGKLDSSNGYCGKCLKSVQIFDKSQPIRYAYGE<br>PKVILEVPPKGDISKESCGVEYDIMEVANERLTFPISDLAPQAERKRRVD<br>NSSLDNSVDSQHGGQSNKRRRQEEIASAILPEDTVNDSVTSTQEAVC                                                                                                                                                                                                                      |

|       |                        |                                           |                                                                                                                                                                                                                                                                                                                                                                                                                                                                                                                                                                                                                                                                                                                                                                                                                                                                                                                                                                                                                                                                                                                                                                                                                                                                                                                                                         |
|-------|------------------------|-------------------------------------------|---------------------------------------------------------------------------------------------------------------------------------------------------------------------------------------------------------------------------------------------------------------------------------------------------------------------------------------------------------------------------------------------------------------------------------------------------------------------------------------------------------------------------------------------------------------------------------------------------------------------------------------------------------------------------------------------------------------------------------------------------------------------------------------------------------------------------------------------------------------------------------------------------------------------------------------------------------------------------------------------------------------------------------------------------------------------------------------------------------------------------------------------------------------------------------------------------------------------------------------------------------------------------------------------------------------------------------------------------------|
|       |                        |                                           | KDQHAAEEADVIMDKIIKVSEVTCEITSTDTFAHQEISVQLQSSEKTSH<br>HNTGIDKEVSEVLKE                                                                                                                                                                                                                                                                                                                                                                                                                                                                                                                                                                                                                                                                                                                                                                                                                                                                                                                                                                                                                                                                                                                                                                                                                                                                                    |
| Ptr3  | Populus<br>trichocarpa | Phytozome<br>12<br>Potri.008G11<br>4800.1 | MFTPQRRPSPAITLTPRSEMHRSGGANAGATSTGIGAKGKALALIDGA<br>LPPPPVGSLSVNAGELDTEDVEAWRRFREVGLLDEAMERRDREALL<br>EKASRLEKELFDYQYNMGLLLIEKKEWTSKYEELRQAWAETEEILKREQ<br>AAHLIALSEVEKRQENLRKALSVEKQCVGELEKALHDLQEEHVLIKKVSD<br>SKLADAKALAAGNEEKSLEVEEKMRVAESKLAEVNMMKSSELDMLNQ<br>LEARENLLQRERLSFNTEREAHKATFYKQREDLQEWKLLRQGEESLCE<br>LRRTLNQREEKASEDERVLKKKERDLEEAEEKIDISFAKLEREVDVNNR<br>LLGLVTKEKEADSLRSTLEIKEKELLALEDKLSARERVEVQELLDEHRTILD<br>AKIQEADLELTEKRKNLEELRSKADGVRLLTEIFHREEKLGKRELALDR<br>KSDRMKDKKDLDAKLKVVKEKDKSMKAEQKQLELQKKQLLSDEVSV<br>QLLEDDCEKLRAEIAQQELQIGEESESIKITTNERLEYLRLQAEKQELEK<br>CRRQAEFLLEAELEQERERSEKEREVLEEKRAQINKEQKDIVEERERL<br>EKMKYAGGESLKKEENDMQEYAQRELEAIRLEKESFEARKRHEQLVLS<br>KAENVHIQMVQDFESERCNFETGLINRQEEMEKALRGRERAFEVKER<br>ELNTINNLKEVARREREEIESERRAMDKERQEVVKNKEKLEEQYGICK<br>DIDELGMLSNLKRKQREQVIRERNYFLSFVEKHKSCNCGDVTREVLVLS<br>DLQPPEMEERETLPSPKISDEFFRNNEGGADASDILNIKRPLSEDLGSNS<br>QGRMSWLRKCTSKIFISPTRKIQHVSAPAFEGGFSSPVRADMEERV<br>EGSAVQKAITSSSIPVDQAQVSFGTADDTVDIQHPQSDGIKRDAGGGY<br>SVSVDDQSYMDSKTQDLPEDSELKNRRHKPGRRQKSGPGRTRSIK<br>AVVEDAKFLGESLKETEYNSSVQPNDISRNSDESRGINVTKKSDVARK<br>RQRLPTEREQDAGDSEGHSESVTTGGRRKRQQIVAPEEPTPGQKRYNL<br>RRHKIAGLTAATQASSDLMKGEKTADGAAAVEPIQNPETASGLSLGVT<br>SENNKSTDVVQVTTLSVELSQDKVVRFQTTDVDYQAEAAKSVGITELS<br>EEVNGIPDFEAEANGSTVHEDEDDYDEDELQHPGEVSMGKKIWTFF<br>TT |
| Pvi1I | Panicum<br>virgatum    | Phytozome<br>12<br>Pavir.Ab0283<br>3.1    | MFTPQKGKWTGWSTPTPANQRSGGGAPAASAPLGKKGKGRVAELEH<br>ELHEYQYNMGLLLLEKKEWAEEKLEEVSQLKQKKEEILKREQAAHLNAIS<br>EYERREESMRKALGVEKQCVIDLEKALREIRAEIAEVKFMSEKKTADAQ<br>SLEASLEEKSLIEGKLHAADAKLAEANRKKSQADRDLVEEARQRRLK<br>EKLYFETERKAQEKQLKEQEESLQEWKLLKESQNRVLDLQRSINDREE<br>RANKNDQLFKIKHGELEEARKSVEANKLALKAKEDDINRRLNELHSQE<br>MDANSKRKELEEREKLIEREKTASIREKEGLQKLEEDYQVELETKRRDF<br>ELELERERKSFDEKMVHKQADLVKREKNVKSLEAKLSKSEQVLNDKKKE<br>MEGWQNLDLDAKSKALKRWEESLKNDDKRLLEEKQRMDQKKDQVE<br>MSKSELERIKSTLEAEKERILEEQNNLKLTEERQEHVLTCLKKEIEEYR<br>MRSNSLSEEIEDLRKQRQKFEFEWEQLDEKRAHLVEEGKKNIERMDL<br>ERWRDSEEKRLNDAKLEMEERYKEKLENLDRKEKALNDDIKHKQMEN<br>DELLKGERADLQRKLQLHRHELEMEMEQQQASKEKELEAKENELNKI<br>DFVENKLRHAIELNESKIQKIIEKKQLQMERKILLEEREKLETDKADIKR<br>DIDSLHGLSQSLKLRRESYNRDRNNLINFKEYKVKCNCGISLFEELDSL<br>LKDSVEIEHPSLAVERDDRSLNADTPAPDTGTLVNSGGRLSLQKCSRLF<br>KFSVPVKKGDQSSEQPTNNVTFGARLEEASQSHGDYPTPVYIEIAHDSF<br>DAEDDLPSDSGAREDNEESERHDPADDVQMESSLGVADNGIDVSGTR<br>SFDGTNDMAVDATIASVDQNGKDSAAPAEADLPETLKQGRRQQRN<br>KGRGKGGVKRTRSVRAVVEDAKTILGETFEKNDGQGDVPVAVGTRKRR<br>FAGAATISEQDEEGSEAHSESVSLGGQRRKRRQTAGAVAGIPGEKRYN<br>LRRSTVANATAATVQIDKKKAAKVGSKHKV DATADDTEGTSKAVEEPA<br>PESKRASESADYGALQLHEFSQAEGVDAPAPAPAEIGIGEGGDIMEGK                                                                                                                 |



|        |                         |                                     |                                                                                                                                                                                                                                                                                                                                                                                                                                                                                                                                                                                                                                                                                                                                                                                                                                                                                                                                                                                                                                                                                                                                                                                                                                                                                                     |
|--------|-------------------------|-------------------------------------|-----------------------------------------------------------------------------------------------------------------------------------------------------------------------------------------------------------------------------------------------------------------------------------------------------------------------------------------------------------------------------------------------------------------------------------------------------------------------------------------------------------------------------------------------------------------------------------------------------------------------------------------------------------------------------------------------------------------------------------------------------------------------------------------------------------------------------------------------------------------------------------------------------------------------------------------------------------------------------------------------------------------------------------------------------------------------------------------------------------------------------------------------------------------------------------------------------------------------------------------------------------------------------------------------------|
|        |                         |                                     | DALPDVPMTPSGSELGAEQDDEDDDDDSERRNQSISKKLWSFFTT                                                                                                                                                                                                                                                                                                                                                                                                                                                                                                                                                                                                                                                                                                                                                                                                                                                                                                                                                                                                                                                                                                                                                                                                                                                       |
| Pvi1II | <i>Panicum virgatum</i> | Phytozome 12<br>Pavir.Aa0079<br>0.1 | MFTPQKGKWTGWSTPTPANQRSGGGAPGASAPLGKKGKGRVAELEQ<br>ELHEYQYNMGLLLLEKKEWAEEKLEEVSQLKQKEEILKREQASHLNAIS<br>EYERREESMRKALGVEKQCVIDLEKALREIRAELA EVKFMSEKKTADAQ<br>SLEATLEEKSLIEGKLAADAKLAEANRKKSQADRDLEEV EARQRRLEK<br>EKLYFETDRKAREKQLKEQEESLQEWKLLKESQNRVLDLQRSVNDRE<br>ERANRNDQLFKIKHGELEEARKSVEANKHALKAKEDDINRRLNELHSQ<br>EKDANSKCKELEEREKLIEREKASIREKEGLQKLIEDHRVELETKRDF<br>ELELERERKSFDEKMOVHKQADLVKRERDVKSLEAKLSKSEQVLNDKMK<br>EMEGWQNDLDAKSKALKRWEESLKNDDKRLLLEEKQRMDQEKHQVE<br>MSKLELERIKSTLEAEKERILEEQNNLKLIEEERQEHSVLTEKLKKEIEEYR<br>MRSNSLSEEIEDLRKQRQKFEEWEQLDEKRAHLVEEGKLNIERMNL<br>ERWRDTEEKRLNDAKLEMEERYKEKLENLDRKEKALNDDIKHKQMEN<br>DEHLKGERADLQRKLQHRHEMEMEQKQASKEKELEDKENELNRK<br>MDFVENKLRHAIELNESKIQKIIEKKQLQMERKILLEEREKLETDKADIK<br>RDIDSLHVLSQSLKLRRESYNRDRNNLINLFEKYKVCKNCGISLFEELDSL<br>VLKDSVEIEHPSLAVERDDRSLNADTAPHTGTLINSSGRLSLLQKCSRLF<br>KFSPGKKGDQSSEQPTESIPFGARLEEASQGDGDYEPTPVYIEAHDSFD<br>AEYDLPSDSGARENEESERHDPADDVQMESSFGVADNGIDVRGTQSF<br>DGTNDMAVDATNDMAVDAAIASVDQNGKDSAAPAEADLQPETSKQ<br>GQRQQRNRKGRGKGGVKRTRSVRAVVEDAKAILGETSEKNDGQRDPV<br>AMGTRKRRFAGSTISEQDEEGSEAHSESLGGQRRRQRRTAGTVTETL<br>GEKRYNLRRSKVANATAATVQTDKKAAGSKHKVEATADDTEGTS<br>KAVEEPAPESKRASEPADYGASQLHEFSQVEVGDAPAPAPAPAEIIGE<br>EGGDIDIVDGKDALPDVPMTPSGSELGAEQDDEDDDDDSERRNQSIS<br>KKLWSFFTT |
| Pvi2I  | <i>Panicum virgatum</i> | Phytozome 12<br>Pavir.Ea0282<br>5.1 | MASPRSGGAGGGAAGDEAIWRKLREAGFDENAVRRRDKAALIGYISR<br>LESEIYDQHNLGLILLDRKELESKYEQLKASSED TDTMLKRERAAQQA<br>LAETRKEENLKKNLCIQKECVSNLEKALHDMRGEAAEVKVSYEAKLAE<br>ALQMIEAAQKKFDEAEDKLLAAKSLEAESTRTRNASLRSQDIEDREDQ<br>LRRDKTSFELERASKEREISLQRKLLDDTRKILHEKEQALLKEQALLNQRD<br>DNILERLGYITHSEKKLEEKLNLEDERKVLMEEKNKLDLKMQAVISREE<br>AIIKESLLDKRETELLVLQETIASKERAIEIRLREQEQEVSLVRRRQEFDTE<br>MEIKLTSFEEIEARKALLDQRESALSEQEDSVAQREQNLNRLAELTSK<br>EESLVKRSDELNEEERKLSHREVYIELQKEREIEIRNMKLDLEKEKSFFE<br>EEKRAIQAEKLLITQNEREDLLILQMKLKEEIDSLRAQKVDLMVDAE<br>RLLAEKERFEIEWELIDEKDELQKEAARIADERRVIDEHLKNELDIKQE<br>KENLRIQFKNSAESLACEHMEFMNKMQQEHASWLSMIQQEREDLKR<br>DIDIQRTELLNSAKARQMEIDSYLREKEDEFEQKKSKELEYINSEKETISSK<br>LEHVRLELQKLEERKEAMLERERREQELSEIKNTIDALNKQREKLQEQR<br>KLLHSDREAITQQIQQLNELEELKIETENKQLSLRQCGRSKHGDGDAEN<br>LKENGVHQSSDEDQNASPKKCSSPKLILGKKLDVSPSVSTPISWVRKCA<br>QVIFKRSPEKSADHDNDRFAHAKLGNVNDPSLVGNGGLFACQLENGA<br>GEVQHAVEKVGKRLNNSLSDQSENFEKPKRKHQRSSTLTRRVRGGEI<br>ESNCSPSVLEEKCSKNEHDAVPVGLSGKGLGYPRPGELASSDASDIPEA<br>SEPSEEISVFASEALDGDADKDEPDEESDDEGEEEEEEKTSSAKKLWRF<br>LIT                                                                                                                                                                                                  |
| Pvi2II | <i>Panicum virgatum</i> | Phytozome 12<br>Pavir.Eb0327<br>4.1 | MASPRSGGAAGDEAIWRKLREAGFDEDVRRRDKAALIGYISRLESEIY<br>DYQHNLGLILLERKELASKYEQLKASSEATEIMLKRERAAQQSALAEARK<br>KEENLKKNLCIQKECVSNLEKALHDMRGEAAEVKVSYEAKLAEALQMI<br>EAAQKKFDEAEKLLAAKSLEAESTRTHNASLRSQDIEDREYQLRRDRT                                                                                                                                                                                                                                                                                                                                                                                                                                                                                                                                                                                                                                                                                                                                                                                                                                                                                                                                                                                                                                                                                      |

|      |                    |                                        |                                                                                                                                                                                                                                                                                                                                                                                                                                                                                                                                                                                                                                                                                                                                                                                                                                                                                                                                                                                                                                                                                                                                                                                                                                                                                                                                                                    |
|------|--------------------|----------------------------------------|--------------------------------------------------------------------------------------------------------------------------------------------------------------------------------------------------------------------------------------------------------------------------------------------------------------------------------------------------------------------------------------------------------------------------------------------------------------------------------------------------------------------------------------------------------------------------------------------------------------------------------------------------------------------------------------------------------------------------------------------------------------------------------------------------------------------------------------------------------------------------------------------------------------------------------------------------------------------------------------------------------------------------------------------------------------------------------------------------------------------------------------------------------------------------------------------------------------------------------------------------------------------------------------------------------------------------------------------------------------------|
|      |                    |                                        | <p>SFELESASKEKEISLQRKLLDDTKKILHEKEQALLKEQALLNQRDDNILER<br/> LGYITHSEKRLEEEKLNLEDERKVLMEERNKLDLMEAIISREEAIKKESL<br/> LDKRETELLVLQETIASKERVEIERLRQEQEVALARRRQEQFDTEMEIKLTS<br/> FEEIEVRKALLDQRESALSEQEDSVAQREQNLNRLAEFTSKEESLVKR<br/> SDGINEEERKLSSHREVYVELQKEKDEIQNMKLDLEKEKSFEEEEKREA<br/> IQAQEKLLITQNEREDLLILQMMLKVEIDSLRAQKVDLMVDAERLLAEKE<br/> RFEIEWELIDEKKDELQKEARIAEERRVIEEHLKNELDIKQEKENLRIQF<br/> KNSTESLACEHKEFMNKMQQEHASWLNRIQQERKDLKRDIDIQRTELL<br/> NSAKARQMEIDSYLREKEEEFEQKKSKELEYINSEKEAMSSKLEHVRLEL<br/> QKLEDERKEAMLERERREQELSEIKNTIDALDEQREKLQEQRKLLHSDR<br/> EAITQQIQQLNELEELKIETENKQLSLRQFGRSKHGDGDAENLKENGVBH<br/> QSRDKDQNASPKKCSSPKLILGKKLDVSPSVSTPISWVRKCAQVIFKRSP<br/> EKSSDHSDRFAHAKLGNVNDPSLVGNGGLFACQLENGAGEVQHAV<br/> EKVGGKRLNNAISHDQSEILQPKRKHQRSTLTRRVIGGEIESNCSPSVL<br/> EEKCSKNEHDEVVGLSGKGLGYPRPGELASSDASDIPQASEPSESAAE<br/> ALIGDAEDKDEPDEDSDHDEGEHEEEEEKTSSAKKLWRFLIT</p>                                                                                                                                                                                                                                                                                                                                                                                                                                                     |
| Pvu1 | Phaseolus vulgaris | Phytozome 12<br>Phvul.008G0<br>20600.1 | <p>MFTPQKVWSGWSLTPNKSGVRGGTGSGLGPNNSGDGVSAAKEQGIV<br/> AVVENGGNNLDRGVLVERVSNLEKELYEQFNMGLLLIEKKEWTSKYT<br/> EQSQDLVEVKDALEREKAAHIALSEAEKREENLRKALGVEKECVLDLEK<br/> ALREIRSENAKIKFTAESKLAEANALVASVEEKSLVEAKLRSADAKFAEI<br/> SRKSSEFDRKSQDLESQESSLRDRLSFIAEQEAHESTLSKQREDLWEW<br/> EKKLQEGEERLAKGQRIINEREQRANENDKLCRQKEKDLLEAAQKKIDAT<br/> NITLRSKEDDVNNRLADIALKEKEYDSLGINLDLKEKELSAWEEKLNAKE<br/> KVEMQKLLDEHNAVLDVKKQFEFVELNEKRKSFEDGLDKDLVELEKKE<br/> AEINHMEEKVKGREQALEKKAEKLEKEKEYEQVKALKEKEKSIKSEER<br/> SLETTKKKIESEREELVTDKAEVEKIRSNNEQELLRINEEIERLKVTEERSE<br/> YLRQLSQLKHEVDQYRHQKELLVKESEDLRQQKESFEREWDELDLKRA<br/> DVEKELKSVIQQKEEILKQQFEEELKNEKQAAQDHIRETLALAKE<br/> SFAAEMELEKSSLAEKAQSQRNQMLLDFELQKKELEADMQNQLEQKE<br/> KDLIERKNLFEEKRESELNNINFLREVANREMDKMLQRSKLEKEKQET<br/> DENKKHLESQRMEMQEDIDLLVDLNRKLNQREQFIVERQRFIEFVEK<br/> LRSCQNCGEIIEFVLSDLQSSDDIENLEVPSLPKLAGDIILGDSIENLASS<br/> RKNIGASPATDQKSPVSAGTISWLRKCTSKIFKISPISKFESEDSGTLRDV<br/> MNLSVEKTNMDSRHENEAELSFAVVNDSLDGRRARSGNDITEVEAVD<br/> QDPSVENQSNIDSKTPEESKAEQQKSRGGGRTRIKRTHTVKAVLKEA<br/> RGILGEAAELLPGESVDNHETFPNGNAEDSANVNSESQGLSNRRIPM<br/> NVRKRNRVQTSQMTVSEHDGEASEGHSVIPGQRKRRQKAAAPP<br/> AQTAGETRYNLRPRGTATTSSARATSAGGKESQGEVHRVKDTEEEIV<br/> DSKISHSLSVGITNEDGGSVHLEQSMKGVETRDGYGGDTTGTGFANNIT<br/> LSEEVNGTADDAEENDAAYRSESHGEDAGGVEIDDEDEDYQHPGEASI<br/> GKKLWNFFTT</p> |
| Pvu2 | Phaseolus vulgaris | Phytozome 12                           | <p>MELSTPNSSKPLSITPGSRVLKSPILDEQIWKRLRDAGFDEESIKHKDKA<br/> ALIAYIAKLEAEIYDQHMHMGLLIMEKKDLASKYEQLEALAESSELMHK<br/> HDSAMNKSALAESRKREESLKKTVSVKDACIASLEKALHELRTESAETKV<br/> AAESKFAEAHQLIDEAQKKITEAEAKVRAAESLQTEANRYHNAERKLR<br/> DVEAREDNLRRKIMSFKADCDEKDKEMIFERQSLSERQKGLQEEQERL<br/> LQSQSLLNQREEHFLSRSQELNRLQKELEDTKAKVEKEHETLHDEKTTLK<br/> MKEATLMQREEELAKWKTELSKKEQELLEFAQKLSIRESDETKKVIAGQ<br/> EAALKTKKYNLEVELQMQRKWWENDIETKRRAWELKEVDLKHCKDEIL<br/> EKQHELEALSRSLSSEKEDLDLSSALEEKDQKLSAAEKEFELNKVLLQKE<br/> KDTIEQAKQDLQKSLASLENKRRQVDIDKERFEAVKNETGDLSILEVKLK</p>                                                                                                                                                                                                                                                                                                                                                                                                                                                                                                                                                                                                                                                                                                                                                                                          |

|      |                    |                                   |                                                                                                                                                                                                                                                                                                                                                                                                                                                                                                                                                                                                                                                                                                                                                                                                                                                                                                                                                                                                                                                                                                                                                                                                                                                                                                                                                                                               |
|------|--------------------|-----------------------------------|-----------------------------------------------------------------------------------------------------------------------------------------------------------------------------------------------------------------------------------------------------------------------------------------------------------------------------------------------------------------------------------------------------------------------------------------------------------------------------------------------------------------------------------------------------------------------------------------------------------------------------------------------------------------------------------------------------------------------------------------------------------------------------------------------------------------------------------------------------------------------------------------------------------------------------------------------------------------------------------------------------------------------------------------------------------------------------------------------------------------------------------------------------------------------------------------------------------------------------------------------------------------------------------------------------------------------------------------------------------------------------------------------|
|      |                    |                                   | <p>EEIDLVRSQKFELLAADKLAEKAKFEAEWELLDEKKEELQKEAFIAKE<br/> REAVSTFIKNERDQLKEEKENLRYQYTQDLGFLASERESFMNKMAQEH<br/> AELFGKMQQERADFLREIEMQKQELNLIKRREEVESYLKEREKAFEE<br/> EKNTLHYINARKEKVAKELDQVSLEMKRLQTERAEINLDRERRNREW<br/> AELTNCIEELEVQRDKLQKQRELLHADRVEIFAQTEELKKLEDLKAVSDD<br/> NAITEMLKSDMESNRKKISSRKNLKRQTLTQGGDKISNGFDTPFVERS<br/> AGSPSPVRFVSWIKRCSELIFRNSPVASDADTGSNSQKHLNDKPLGIG<br/> KGQQMGFSFEESKVVIVEVPSRDDARRREIESEAKNVNGKSALLFPDGH<br/> LAGRRKRGRGNVTSKVGDPVLDLQGNKKSRAEGQTENPIDQGTRR<br/> VVSTQSDVLKVQVLTSSNQTQGNTEETRVVMVDKVIHVSEVTSEKV<br/> DALPIDSQEPGDNPNPALAEDHYGETIDQINSKTKREDILPRVSRVLG<br/> STEEISKGNNGQDSENC</p>                                                                                                                                                                                                                                                                                                                                                                                                                                                                                                                                                                                                                                                                                                                                                        |
| Pvu3 | Phaseolus vulgaris | Phytozome 12                      | <p>MFTPQQKAWPNAAVPFTPHRGGAAATVSASAKGKAVADGPPPPPLGS<br/> LTETTAVAGFDTGNAEDWKRFTLGLLDESVMQRKDHEALMEKVLRL<br/> ERELFDYQYNMGLLLIEKKEWNSKFDQLRQELAETEEILKREQSAHLIAL<br/> FEVEKREENLRKALSTERQCGADLERALRAMQEEHAQIQSKSHTKLAE<br/> ASALVDGIEEKSSVVDKLLDAEAKLAEVNRKNAELGMKLQVEVARES<br/> LQKERLSLVTDRELFDATFYKEREDLKEWERKLQRENMLCNGRQNG<br/> EKEENIVKTEKNLQKERDLEVLEKKINSSNSILKEKEAEIIRRTADLNME<br/> EKKVDSLKSMLEKKEKELFALESKSSREREGIQLLGEQKATLDLQLOQ<br/> VEFEMEHRKSLVEEFSSKEEALQREVEVNHREKKVEKEEQALSCKAE<br/> RLKEQSKEIEAKLSLKEKEKTMKIKEKELEKDNQQLLADRESLENLNAE<br/> LQKIKAEISLQELQICEETKNLKLTEDDRENSRLQLELKQEIENTRLQKD<br/> SLVKEAESLREERQRFEKEWEVLDERREEITRKHQHDIDEEKESLRKLQNS<br/> EEERLRSKKQNMQEHKKELEKLEKESFRDSMNQEKHLLSEKVKNEQ<br/> DKMLQDFESKTRNLENEIQKRQEEIEKDLQERERNFQEEMRKELDNINI<br/> LKDVTEKEWEEAKAEGIRLENERKELELNKQQLKSGQQEMHEDSEML<br/> MNLQKVKKERQRLVAERKHFLLENLKSRCVCGEVVGVDFVISDIELP<br/> DFKESMAIPSPISPVLNYSKPKNSQDIVASSDINNSGSRVPVSWIRKCTS<br/> KIFKLSPNKRAEAVSALDTAGTSLPSDVNVVVEKADEPASLPNIEGARVI<br/> LDERQPASGRAYHSLDTPLLQSENIDKELDDEYSQSVGDHSRVDSLVD<br/> GDRDDSHQSVPKLRRGRPGKKSXGIARTRSVKAVVEEAREFLGKTPK<br/> KNENASLQSLTDDHIKEDSREDSSHVEKAVGNTGRKRQRAQTSRVTES<br/> EQNAGDSEGQSESITAGGRRKKRQALAPPAQVTSEKRYNLRQHKIAGK<br/> DSSTRDLPNATKSVVKEAAGGNKLGEMSPVETSAAADDNAQDK<br/> SMVQDSTTKTVEVSDERVVVRFVPRDIVDDNGAATDSLNPAAENGT<br/> PEHQNENGSTIHDFEDEDDEEDGDEEHPGEVSIGKKIFRFTT</p> |
| Rco1 | Ricinus communis   | Phytozome 12<br>29673.m000<br>916 | <p>MFTPQRKVVSGWSLTPRSEKTGSGSDSKMNGLNNVNSGDASVLKG<br/> KSAFAEVPVTPNGVGLALDGDVGLVEKISKLENELFDYQYNMGILLIE<br/> KKEWTSKYEELKQAIREATDALKREQAHLIAISDAERREENLRKALGVE<br/> KQCVLDLEKAVREMRSENAELKFTADSKLAEANALIISVEEKSLEVESKL<br/> HAADAKLAEVSRSSEIDRKSQDVESRESALRRERISFIAEKEAHESTLSR<br/> QREDLREWERKLQEGEERISKGQRIINQREERANENDRILKQKEKDLLE<br/> AQKKIDEAEVVLKNKEDEM TIRLANLTLKEKEFDATGKKLEMKEEKLSR<br/> LEESLNDREKVEIQKLIDEHTAILEVKKREFLEADQKRKSLDEELKNKVN<br/> EVEKKEAEIKHMEDKVLKREQALDKKLDKLEKEKEFEFESKSKALKEKEKI<br/> KSEEKNLENEKRQLNSDKENFLNLKAELEKIRAANEEQLLKIREEKDQLK<br/> VNEEERVEYVRLQSELKEEIEKRLQEQFLKEVEDLKQKQENFEREWD<br/> DLDEKRVEIEKQLKSISEQREKFEKQKASEERIKHEKQNVEDYVIREREA<br/> LEIAKESFEANMEHERSALAELKALSERQQMLHEFELQKSELGNDLQIKQ<br/> EGMEKVLQEKELFEEERELKNINFLRDLARREMEEMKFERLRIEKE</p>                                                                                                                                                                                                                                                                                                                                                                                                                                                                                                                                                                                            |

|      |                     |                                      |                                                                                                                                                                                                                                                                                                                                                                                                                                                                                                                                                                                                                                                                                                                                                                                                                                                                                                                                                                                                                                                                                                                                                                        |
|------|---------------------|--------------------------------------|------------------------------------------------------------------------------------------------------------------------------------------------------------------------------------------------------------------------------------------------------------------------------------------------------------------------------------------------------------------------------------------------------------------------------------------------------------------------------------------------------------------------------------------------------------------------------------------------------------------------------------------------------------------------------------------------------------------------------------------------------------------------------------------------------------------------------------------------------------------------------------------------------------------------------------------------------------------------------------------------------------------------------------------------------------------------------------------------------------------------------------------------------------------------|
|      |                     |                                      | RQEIEENKKHLQEQQLEMRRDIDKLGDLSSKLLKDHREQFVKEKERFILF<br>VEQHKSCKNCGEITSEFVLSDLISSQEIEKAVLLPNQGLIQSATGNCNQN<br>LAATAVQDNDISPSAGRSASPVSWLRKCTSKIFSFPGNKMEPAAVQN<br>LTAPLLAEDREEPSKRLDFTAHEPELSFTIGNDSLQVRIQSDSSIREAEA<br>VQDFSIDDKSNINNEAIQVPEGTQPSNVKLRQIHKRGRPRVSRTRSM<br>KAVVQDAKAILGESLELNTETEDSSHLKAESRGESNLADEKISRNARKRK<br>STRASQNTVSEHGDGDGDESEGHSDSITAGKRRRQKQVAIVQTPGE<br>KRYNLRRPKKGAKPLSDIGREDKEEGGVRGPTSTGIASENGGNARFEQ<br>LEVVSDTDADSTRNLVEYAALSEEVNGTPDEGGEFGVAEEYRSESHRG<br>DEDDEEDEDDESHPGEASIGKKLWTFFTT                                                                                                                                                                                                                                                                                                                                                                                                                                                                                                                                                                                                                                                  |
| Rco2 | Ricinus<br>communis | Phytozome<br>12<br>29825.m000<br>318 | MASPITPGSVRGLSITPGARVLKTPLSDETIWKRKEAGFDEESIKRRDK<br>AALISYIVKLESEIYDLQHHMGLLILERKELASNCEQIKTSAETTELKHKRD<br>QAAHLSALAEARKREESLKKALGVEKECIASIEKALHEMRAESAEIKVAA<br>DCKVAEAHSMVEDAQKKYTDAAEKLHAAEALQAEATQYRRRAERKLQ<br>EAQAREDDLRRISTFRADCAKEKEIDLERQTLSEERRKLLQQEHERVLD<br>GQALLNQREDYIASKSQELDCLEKELEASKGSVQEELRALNDEKSKLGV<br>TVASLSQREQAVVEREALLNKREQDLLIMQEKLASKESVEIQKVIANHE<br>TLLRTRKLEFEAELEMNRKLAEDEIEAKRRRAWELREVDLSQRELLNEKE<br>HDLEVKSRLADLEKDVTEKVNFLDEKERCLNAAEKENELRRALLDQQK<br>NEINKMKLDIEKLSNLENEKKQVDCAKEKLETMKNETNELAVLETCLK<br>EEVDMLRAQKVELMAEEDRLKVEKAKFEAEWELIDEKREELQIEAERV<br>AEERQSVCRLLKDGRLRVEKETIREQHKHDVELLNHEREEFMNMKMV<br>QERSEWFNKIQKEHADFLGIEMQKRELENSIEKRREEIECYLRDQEKAF<br>ELEKKNELHISSLREKAAKELEQAALMCKLDSERMEINLDRDRRDIE<br>WAVLNKSIEELKGQTQKLEKQRELLHAEREEVCAQIEHLKLEDLKLML<br>DNMELAKMQQSNMESSQKKISAIRDLRQESTVKNADKISYKRVENGN<br>SGDVLDSPSMQKLDVSPSPGSARFSWIKRCTELIFKGSPEKPLLKSEES<br>LISNHENASLISAGKLDSSNGFSEQVLKPRKRVRKNSRLDGSADPWPE<br>QRQNNKRRKQQEDA AVILSPDANNHSVTSNQENAPKTQHLTEEDSE<br>NHVQVAERIIKISEVTCEIAHIDNFPNQEKVEQQLIPEATCDHSAVQDG<br>GTNGHANQQGYVDHSLQPCGLEAPEMLKDQLGNDGRVTEQQQAGSN<br>ISLYEHYISINCVSFAYNIMNKLLIC |
| Rco3 | Ricinus<br>communis | Phytozome<br>12<br>29738.m001<br>028 | MFTPQRRSSPAITTLTPRSEVRKSGATGNVVGKGMAMTFIDGPTLLPPP<br>PPPVASLSGNAEATEDMEDWRRFKEAGLLDEAVMERKDRQALIEKA<br>SRLEKELFDYQYNMGLLIEKKEWTSKFDELRLQALAEAEILRREQSANII<br>TFSEAEKREENLRKALGVEKQCVIDLEKALRDQEEAQIKHASESKLAD<br>AKALSVGIEEKSLEVEEKMHAAEAKLTEINRRSLEVDMKLQVEVARD<br>MLQRERLSLNTEREAHQANFYKQREDLLEWEKILKKGEERLCELQKTLN<br>QRENEVNESDRILEQKERDLENTEKKIDISSAKLKEREDDINNRLSDLAA<br>KEKKADCTQSILEVKEKNLLALEEKNAREKMEIQELLEDEHRATLVAKRQ<br>ELELELEERRKILDEELRSKVEALGQREVEVLHGEEKLRKREQALDKKAE<br>RVKEKEKDLDMKLKNAKEKEKSMKAEQKLELEQKTLAERDSLQNLK<br>DDCEKIRSEISNQEQQIGEKSENKLTNDERLEHLRLQAELEKQELEKCRH<br>QEEYILKEAEELKEERKNFEKELEVLEEKRAQLSKELNEITEEREKFKQLQY<br>TMEERLKEENAMKEYTQKELETVRVEKEYFEMRKRNEQQVISKQAKT<br>EHDQMVQDFESQRSTFEADLVSRRREMEKGLRERERAFQLQRDRELK<br>EINYSKEAAQKELEEIRIERHVIEKEKQEVAKNKEELDGGQFGMRKDIDE<br>LVMLSNKLRDQREQVIRERNHFLAFVEKHKSCNCGDVTAEFILSDLLP<br>PDMEDRKILLQERADELQDQSPGALNVKKSQGELDLSQECVSW<br>FRKCTSKIFSISPKKIEQVLAPVLAEEKTDALGTLARKEASRNGVPGDES<br>PSFGTTHDSVEIQQLQFDSIKVEGDGNSISFDDHSNVDSKVEDSGPSKL                                                                                                                                      |

|      |                           |                                     |                                                                                                                                                                                                                                                                                                                                                                                                                                                                                                                                                                                                                                                                                                                                                                                                                                                                                                                                                                                                                                                                                                                                                                                                                                                                                                                                                                                    |
|------|---------------------------|-------------------------------------|------------------------------------------------------------------------------------------------------------------------------------------------------------------------------------------------------------------------------------------------------------------------------------------------------------------------------------------------------------------------------------------------------------------------------------------------------------------------------------------------------------------------------------------------------------------------------------------------------------------------------------------------------------------------------------------------------------------------------------------------------------------------------------------------------------------------------------------------------------------------------------------------------------------------------------------------------------------------------------------------------------------------------------------------------------------------------------------------------------------------------------------------------------------------------------------------------------------------------------------------------------------------------------------------------------------------------------------------------------------------------------|
|      |                           |                                     | KSSQRKPGKRRKGLNRTRSVKAVVEDAKLFLGKSAEPEYISDESRGIS<br>THTEKLASNIPRKRERTPAESEQNAGDSEGFSDSVTTGRRRKRQMVV<br>PTITPGQKRYNLRRHKVDQALSGSVKTGEKESDGGDAAEPIPKPETVSA<br>LSLGVASETEKSTDLVKFSTENVNDQADATKSVEITELSEEVNDTSEYGV<br>EDENGSTIHEDTQEDCDDDESEHPGEVSIGKKIWTFFTT                                                                                                                                                                                                                                                                                                                                                                                                                                                                                                                                                                                                                                                                                                                                                                                                                                                                                                                                                                                                                                                                                                                          |
| Rmi1 | Retrophyllum_<br>minus    | onekp:VGSX<br>_scaffold_20<br>74329 | MLTPKRRGWPGWSPLSRTPPGGEEKSGGADKAVGGNGGAAEGPPR<br>NSLEENGGIVVPREPETWRHFREAGSLDPESIERKDRAALVAQVNKLE<br>AELYDYQYNMGLLLIERKEWTSKYDQVKLAFAEAEENLKREQAAHLVA<br>ISEAEKREESLKKALGVEKQCVADLESALHEMRAEIAEVKFTSDNKMAQ<br>AREMIASTEESLAAESKLHAAEALQAETSRKHAETERKLQEIEGIESAL<br>QRDRQSFKSECDAREAQVFLERQNLLEWEKKLQEGQERLLEGQRLLN<br>QREEYTNQRDEVKQIDKELEDAKKRIESDHATLKEKEADISVRLAALAT<br>REENAVKREIIDDKKEQELLVLQEKLSRENEEIQKLIDEHKAVHEARKNE<br>FEAELEHTKIVVEQELEKRQTAVASMEADIIRKEEKLNKREQQFEKKSEK<br>FKEKEKEVDSRLKALKEKEKTYKNEEKKVEVEKNQLEREREINNEKNEL<br>QKIKIALEEEKQEVNEQEHLKVTEKERNDLLKLQTLQKEEINRYAQKQ<br>EVEKEAEELRLQRENFEKEWEFLDEKREQVRKESAQVDDERKKTSKWL<br>LDEQDRKQEKSTLRERIQSETEALRLEKEAFEASMQHERSEWLENIRN<br>EQADLVRDIELQRSELENSIEKRREEIEKLLKEKEIGFHKEREREMQHINA<br>QRDLASKEMEEMRLERHKLEKERQELISREHAERQWSEIKKDIEELQV<br>QRDKLKEQRDSLHKEREVLRLLLEHLHKLKTEISVTDDVLMNTGNKGGI<br>NSPRTGDVPSISKEALTQNI FGTPGGPSLKFNPPESSGSLFERDSGTPNR<br>LSWLQRCASRFFSQSPSPQKMDVSTDTRKGETAVRPTLETEAVGAESER<br>GNREIVVGLIEERAFLADAKNYDAADQDENEKMHELDIPKLGPSVYFD<br>HSLPSSSNGNGRKPSSKIKVFKRTRSMKAVVEDARGIVEVSSDKEM<br>NESDKGQALEQNEAVVTDNREKGESAGREKTTSGQEIDGSNRESPAT<br>DKRPSKSGRKRRRGQSSRATSEQDAEDSEIQSEPAIGRRRKRQQA<br>NGGSSGVGTPGAKRYNFRHSTIASSVATQVQSVDAKDKNAPAEEDK<br>NKNSQASPSSKIVNTEETSLEDESAMVPSGQESDKHNPTVEKVDNGLE<br>NAVEDLQEVSSHEPTKSGTDVYPQSEDEGGNGEETQYTEERDDEDG<br>DFDDDEDGDFDDNDPPSLRKKLWKFLTT |
| Rmi2 | Retrophyllum_<br>minus    | onekp:VGSX<br>_scaffold_20<br>13004 | NPVNETEIWRRLKQVGLDEETLQKKDKAALIAYITKLESELYDYQYNMG<br>IILLERKEWTFRYEQLKISAEAEAGNYKHDQAAHLAGLADA EKREESLRK<br>ALGIEKQCVADLEKALHEMRAESAIEIKFVSDNKLAQACELLAATEDKSL<br>AAESKLHAGEALQAEANRKRADAERMLQEVEAREDELRRQRQAFKSE<br>CDAHEKEFYFERQSLREWQKKLQEGQDRLLEGQGLLNQREEYIIRSEA<br>TNQIEKDLQDVKRNVKEQSNLKEKEADMVRLADLRIRREALVKRET<br>VIDKKEKELLLLQEKLATREEREEIQLRTDVHQAVFEARTLEFEAEVEQKR<br>KAVDDELENKRNAADMRELEMKCKEELSRGQQLKKSCLKKEKELD<br>AKLKALKEREKLFRIDEKEFETKQKKLEEEEREMNNLKQVLGKLKAALEE<br>ERHQIHKEQEKLLETENERNDMKIIQTKLKQEI DNLRKADQELSKKEDLL<br>NVEKEKFEREWEILDEKTEQLRKELEQVDEEKRRVSQWLKDEEERFKQ<br>DRRVLREQIKRDEEALRLKKEAFASSKRHEETELLAKIERERADLYRDIEL<br>RTSELEKIFQRRREELERHYQDRESAFLKEKQKGMQQIVAQKEMSDKE<br>LEQIQLERQKLDREWKETATTREQIEREWSEMKKDIEELQIQKDKLKEQ<br>RESLHNERHELEAQLDQLKLLKADLKMTEDSLKLEQQIS                                                                                                                                                                                                                                                                                                                                                                                                                                                                                                                                                                        |
| Sac  | Selaginella_<br>acanthota | onekp:ZYCD_<br>_scaffold_20<br>3178 | WESFKEAGALDEASLEMKDRTALISHISKLENDLYQYQYQMGLLLLESK<br>NQGSESERLNILLEETRDALKREQAAQMVVAISEAEKREESLKKAAATER<br>KCVADLEKALREMQLIEAEAKAASEREVQRAKEAAQLAEERLEAESRL<br>CSGEALHAEARNRFAEASRLAEADSREDELRRERHYFKQSEARKAEI<br>ESERKSLKDLQKDLTELEQLRSRSEKSLSRQDYIEQREEALTKLQKNLD                                                                                                                                                                                                                                                                                                                                                                                                                                                                                                                                                                                                                                                                                                                                                                                                                                                                                                                                                                                                                                                                                                                |

|      |                        |                                     |                                                                                                                                                                                                                                                                                                                                                                                                                                                                                                                                                                                                                                                                                                                                                                                                                                                                                                                                                                                                                                                                                                                                                                                                                                                                                                                                                                     |
|------|------------------------|-------------------------------------|---------------------------------------------------------------------------------------------------------------------------------------------------------------------------------------------------------------------------------------------------------------------------------------------------------------------------------------------------------------------------------------------------------------------------------------------------------------------------------------------------------------------------------------------------------------------------------------------------------------------------------------------------------------------------------------------------------------------------------------------------------------------------------------------------------------------------------------------------------------------------------------------------------------------------------------------------------------------------------------------------------------------------------------------------------------------------------------------------------------------------------------------------------------------------------------------------------------------------------------------------------------------------------------------------------------------------------------------------------------------|
|      |                        |                                     | EAKEAIEKDRACMHQSEALNAQMAAFSLREQAAIERENAALKKEQD<br>LLLLQEKVDNKDRAFAQHEQHVREAEANAERERLEALEANLRSRQ<br>SILEAQRKMDEFKCLEDEQEEALRKKRTDFEKEAELRRAVSCEKEELET<br>VKQQIQEERLKVIEQEREELLKVQTRLKEEIDDFRARKQDLTQESDEL<br>KKEKEKFETQWELLDERKEKLRKEIEHFQEKRRTTKRLQDEEGRLKQE<br>RRELHEKTKRELEALTQERETLMKNMELQRAEIFSKAEREREELLRDVD<br>LRAELERNIRKRSEEIEKQAEESKLRMEIQKETQELETVREHTKRELE<br>DIQSERLKLEKERNDIVVQRELAEGEWQEIKKDINELQVQREKLKQRE<br>ALRSEREELLRETERLRKMKDELKEVEDSQRISEQPSHRINEGEVVSQRR<br>RSKAQPALFEAQLLPDATPAPAGPSPVVAENITPARFSWLQRCASRIFP<br>LTSPTK                                                                                                                                                                                                                                                                                                                                                                                                                                                                                                                                                                                                                                                                                                                                                                                                                      |
| Sam1 | Sundacarpus_a<br>marus | onekp:KLGf_<br>scaffold_201<br>5127 | MLTPKRRGWQGSPLSRTPPGGEEKAGGDKPHGTVGVPSGSGGGA<br>MAAVEGPPRNSLEENGGILVPREPETWRRFREAGSLDPSIEKKDRA<br>ALVAQVNKLEIELYDYQYNMGLLIERKEWTSKYDQLKFAFAEAENLK<br>REQAAHLVAISEAEKREESFKKALGVEKQCVADLENALHEMRAEIAEVK<br>FTSDNKLAQAREMMASTEESLAAESKLHATEALRAEASRKHATERK<br>MQEIEAIESALQRERQSFKSECDARDAQLSLERQNLLEWEKKLQGGQE<br>RLEGGQRLLNQREEYTNQRDKSLKQLEKELEDARKQMESDLETKEKEA<br>DISVRLAALATREENAVERETIIDKKEQELLVLQEKLSRENEEIQKLINEQ<br>KAILEARKIEFEDELEQTKIVIEQELEKRQSTVLSMEADIIRKEEKLKREQ<br>QFEKKSEKLKEKEKDVDSKLKALKEREKTFKNEEKMVEVDKNQLERERE<br>EVNNEKEELQKIKIALEEERRVVLNEQEHKLVTEKERNELLKLTQLKEEI<br>ENYRARKQEVEKEAEELRLQRENFEKEWFLDEKREQVRKESAQVDEE<br>RKRISKWLLDEQERLKEEKSTLRERIQSETETLRLEKEAFEASMQHERSE<br>WLENIRNEQADLVRDIELQRSELENSIERRREEIDKLSREKILFQKEKES<br>EMQHLNAQRELASKEMEEMRLERHKLEKERQELGISREHTEKQWSEI<br>KKDIEELQVQRDKLKEQRDSLHKEREVLRLEFHLHLKTEVNVTDAL<br>NLTTNKGESNLQEAPTQNIQFTGTPAGASLKNPESSGRVFNENGSGTPH<br>RLSWLQRCASRFFQSPSPQKRFYDRKGETTVRSTVETEAVVVESERGN<br>REIVVGLEIEPALLADAKNYDEAVENKNEEMQEHEAGPSVYFDHSLPSS<br>SNGNGRKSSDKSIKVFKRTRSMKAVVEDARGILEVSSDKEINESGKGQ<br>ALEQNEDAFPNDREKGESAGGETTSGQEIDGSNRESLATDKRPSKSG<br>RKRRRGQSSRATSEQDAEDSEIQSEPAVGGRRKRRLPTAANGVSSGVG<br>TPGAKRYNFRHSTIASVATQAQSIDAKDKENSPAEDKNKNSHSSTSG<br>KVIMNRDETSFDKSAMVPSGQSEKHSPTVETGDNGLGDAIEDLQEV<br>SSHELTSKSETDVYPQSEDEGDNGEEAQYTEERDDEDGDFDDGND<br>EEDNDPPSLRKKLWTFLLT |
| Sam2 | Sundacarpus_a<br>marus | onekp:KLGf_<br>scaffold_209<br>4915 | SPVNETEMWRRKQVGLDEETLQKKDKAALIAHITKLESELYDYQYNM<br>GLLLLERKEWTSKYDQLKISAESEGNKYRDRAAHLAALADAEKREESL<br>RKALGIEKQCVADLEKALHEMRAESAIEKFSVSENKLAQACELVSATEEK<br>SLAAESKLYAGEALQAEANRKRSDAERMLQVEAREDELRRQRQAFKS<br>ECEAHEKELYFERQTLGEWQMKVQEGQDRLEGGQRLLNQREEYIERS<br>EATIQIEKDLQDVKRKVEQEQLKEKEADMVVKLADLTIREALVKRET<br>VIDKKEQELLLLQEKLATREREGIQRLTDEHQAVLEARTLEFEAEMEHK<br>HRAVDDELENKRNAADIREHEIKSKEEKLSKKGQMEKKAELKEKEKE<br>LDAKLRALKEREKILKIDEKEFETQQKLEAERKEMDNLKQVLEKLKAAL<br>EERHQIHEEQEKLELTENERNEMKIIQTKLKEEIDNVRKADRELSQKED<br>VLNVEKEKFEREWEILDEKTEQLKKELEQVDEEKSRVSKWLKDEERLK<br>QERRVLREQKSDEEALRLKKEAFASSKRHEEAELLAKIERERADLYRDID<br>LRTSELEKSFEQRREELERHYQDKESAFKKEKQKEMQHIVAQKEMSDE<br>ELEQIRLERQILDREWKETATTREQIEKEWSEIKKDIEELQIQKDKLKEQR                                                                                                                                                                                                                                                                                                                                                                                                                                                                                                                                                                                                           |

|      |                           |                                           |                                                                                                                                                                                                                                                                                                                                                                                                                                                                                                                                                                                                                                                                                                                                                                                                                                                                                                                                                                                                                                                                                                                                                                                                                                                                                 |
|------|---------------------------|-------------------------------------------|---------------------------------------------------------------------------------------------------------------------------------------------------------------------------------------------------------------------------------------------------------------------------------------------------------------------------------------------------------------------------------------------------------------------------------------------------------------------------------------------------------------------------------------------------------------------------------------------------------------------------------------------------------------------------------------------------------------------------------------------------------------------------------------------------------------------------------------------------------------------------------------------------------------------------------------------------------------------------------------------------------------------------------------------------------------------------------------------------------------------------------------------------------------------------------------------------------------------------------------------------------------------------------|
|      |                           |                                           | ESLHNERQELEAQLDQLKKLKAELKMTEDSLKLESEQQISQVNVNDCEVI<br>SAKQFDGCDSSLAIRQNVSAIPCKTGEFRSEIYLGGPVVSASDTPSPLG<br>WLQKCASRLFQKQSP                                                                                                                                                                                                                                                                                                                                                                                                                                                                                                                                                                                                                                                                                                                                                                                                                                                                                                                                                                                                                                                                                                                                                      |
| Sbi1 | Sorghum bicolor           | Phytozome<br>12<br>Sobic.004G2<br>64300.1 | MFTPQKGKWTGWSTPTAANQRSGGAPAASAPLGKKGKGRVAELEQ<br>ELHEYQYNMGLLLIEKKEWTAKSKEISEVLTQKEEILKREQAHLNAISE<br>YERREENMRKALGVEKQCVDLEKALRDIRAEIAEVKFTSEKKITDAQSL<br>EASLEEKSLIEGKLHAADAKLAEANRKKSQADRDLLEEAEARQRLEKE<br>KLYFETERKAREKQLKEQEESLQEWKLLKESQNRNLNDLQRSINEREER<br>ANKNDQLFKIKQDELEEARKTVEAAKVTLKVKENDINKRLNELHSQEKD<br>ADSKRSALEREKKLVEREAKVTTREKEGLQKLEDRQVEFESKRRDFEL<br>ELERERKSFQKMTQNAQADLLKREKNVKSLEAKLSKSEQALNDKKKSM<br>ESLQNDLDAKSKALKRWDESLKNDEKRLLEEKQQLDHEREQLETYKLEL<br>ERTKSALEAEKERISEEQNNLKLTEQERQEHSLTAEKKEIEEYRMRSN<br>SLSEEMEDLRKQRQKFEFEWEQLDEKRALLVEEDKKLKIERMNLERWR<br>DNEEKRLNDVKLEMDEKLDQLENLERKEKALTDDIKHKQMENDEFK<br>GERADLQRKLQRQHELEMEMEQKQASKEKELEEKENELNKKMDFVE<br>NKLQHAIELNESKIQKILLEKRELQMEREILLEERKKLETDKADIKRDIEIL<br>HLSLSLKERERYNRDRKSLIDLSEKYKACKNCGISIFGEELNSLLKDG<br>AEIEHPSLAVEGDDRALTTGTSGPDTGTLVSSGGRLSFLQKCSGLFKFSP<br>RKKGEQSSEQPAEKNIPIFGARLEEAQIDGDYPTPVYEVASFDAEDEL<br>PSDGGTRENEESERLDIADDAQMESSVGVADNSIDIVGTQSFDTNNI<br>AVEPTIASVDQNGKDSAAPAEAGVQPETLKQGRRQQRNRGRGKGGV<br>KRTRSVRAVVEDAKTILGETFEEKNDGQGDVKVVGATRKRFRVGTATISE<br>QDEEGSEAHSESVSLGGQRRRRTSGAVTEAPGERRYNLHRSVAN<br>AATATAQADKKKSAKAGNKHTVDATADDTEGTSKVDEEPAPESKKAS<br>ESADYGASQLHEFSQVEVGDAHAPVEGAGEEDGDIDIVGGQALPDV<br>LMTPSGSELGAEQEDEDDEDDSERRNQSIGKKLWSFFTT |
| Sbi2 | Sorghum bicolor           | Phytozome<br>12<br>Sobic.003G3<br>08200.1 | MASPRSAGGVAGDEAIWRKLEAGFDEDAVRRRDKAALIGYISRLESEI<br>YDYQHNLGLILLEGKEMTSKYEQLKASSEATEIMLKRRERASHLSALAETR<br>KREENLKRNLAIQKECISNLEKALHDMRGETAEVVKVSYEAKLAEALQMI<br>ERAQKKFDEAEKLLTAKSLEAECIRTRSASLRSLODIEDREDQLRRYRTS<br>LELENASKEKEINLLRKSLLDTKKVLHEKEQSLLEQQLLNQRDDNILERL<br>GYITRSEKRLEEEKLNLEDERKVLLEEKNLDLNMQAISREEAIIQKESIL<br>DKRESELLVLQETIASKERAEIERLRQEQEVALVRRRQEFDTHEMEIKLSSF<br>EEEIDARKALLDQRETAINEQEDAVAQRKQNLNRLAELANKEESLVKK<br>SDELREEKRLASERETLHMELEKEKEEIQNMKLDLEKEKSFEEEEKREAI<br>QAQENLAITQNEREDLQSLQVCLKDEIDSLRAQKVDLMVDAERLLAEK<br>ERFEIEWELIDEKKEELQKEAARIAEERRVMDEHLKDELDIKQEKEDLR<br>VQFKSSAESLAREHDEFMNKMQQERASWLSRIQQUEREDLKKDIDIQRI<br>ELLNSAKARQMEIDSYLREKEEFQKKSKELEYINSEKEAINSKLEHARL<br>ELQKLEEERKGMALERERREQELSEIKNTINALNEQREKLQEQRKLLHS<br>DRESITLQIQQLNELEELKIESENKQLSLRQCGKSKNGGVENLKENGVHL<br>SPDEDQNASPKQTSVKKLEVSPSVSTPISWVRKCAQVFIFKRSPEKSAD<br>PHNDRLVPAKLANAIDSSLAAYSDGLFAHQLENGAGKVPQTVDGLK<br>VGKKRLNNAISHGDSEISQPKRKQQRSTTQTLRVIGGEIDSNCSLSILEE<br>KCSKNEHDTVPGVGLCGKPHNTQAGELPSSDDVPLVNGKSDASEVPE<br>DDEHSEDISVSAADPSNRHGVVDSVDKHEPDESDDEGEFEEKTSSAK<br>KIWRFLIT                                                                                                                                                                  |
| Sco1 | Saxegothaea_co<br>nspicua | onekp:QCG<br>M_scaffold_<br>2009809       | MLTPKRRGWPGWSPLSRSPPAGEEKGDKVHVTGGVAGGSGAAVE<br>APPRNSLEENGDIILVPREEPETWRRFRREAGSLDPESIERKDRAALIAQVT<br>KLEAELYDYQYNMGLLLIERKEWTSKYDQVKFAFAEAENLKREQAHAH                                                                                                                                                                                                                                                                                                                                                                                                                                                                                                                                                                                                                                                                                                                                                                                                                                                                                                                                                                                                                                                                                                                        |

|      |                             |                             |                                                                                                                                                                                                                                                                                                                                                                                                                                                                                                                                                                                                                                                                                                                                                                                                                                                                                                                                                                                                                                                                                                                                          |
|------|-----------------------------|-----------------------------|------------------------------------------------------------------------------------------------------------------------------------------------------------------------------------------------------------------------------------------------------------------------------------------------------------------------------------------------------------------------------------------------------------------------------------------------------------------------------------------------------------------------------------------------------------------------------------------------------------------------------------------------------------------------------------------------------------------------------------------------------------------------------------------------------------------------------------------------------------------------------------------------------------------------------------------------------------------------------------------------------------------------------------------------------------------------------------------------------------------------------------------|
|      |                             |                             | <p>LVAISEADKREESLKKALGVEKQCVADLENALHEMRAEIAEVKFTSDNK<br/> MAQAREMIASTEESLAAESKLHSAEALQAEASRKHAEETERKLQEI<br/> ESVLQRDRQSFKSECEAREGQLFLERQNLLEWEKKLQEGQERLLE<br/> LLNQREEYTNQRDEALKQIEKELEDARNQIESDHATLKEKEADISV<br/> RLAALATREENAVKREVIIDKKEQELLVLEKLTRENEEIQKIIDEH<br/> KAIHEARKNEFEAELEQAKIVVEQELEKRQSAVASMEADIIRKEE<br/> KLSKKEQQFEKSEKLKEKEKEVDSRLKAMKEREKTLKNEEKKVEVE<br/> KNQLGREREETNNEKEELQKIKIALEEEKLQVLNEQEHLKVTEKER<br/> NELNLQQTQLKEEIEENYRARKQEVEKEAEELRLQRENFEKEW<br/> EFLDEKREQARKESAQVDEERKRMSKWLLDEQERLQKESALRER<br/> IQSETEALRLEKEAFEASMQHERSEWLENI RNEQADLVRDIELQR<br/> SELENSVEKRREEMEKLLKEKEIGFQKEKEREMQHINTQRELASK<br/> EMEEMRLERHKLEKERQDLGISREHAEKQWSEIKKDIEELQEQRD<br/> KLKEQRDSLHRERQEVLRLEFEHLNKLKEELNVTEDEVLNLTGN<br/> KDGSNTPRTEDFPSISHEALAQNILGTPAGAPLKFNPPESSGRV<br/> FESGSGTPNRLSWLQRCASRFFIQSPSPQKMVDSKDGKSEA<br/> AVRSTMETEAVGAEGERPNIIVGLEIEPAFVADANNYDAADQDK<br/> NEKMHEHDITKPGPSVYFDHSLPSSSNGNGRKSDDKSKIKVFKR<br/> TRSMKAVVEDARGILEVSDKEMNESEKQALDQNEAVVPDNREK<br/> RESAGREKTTSGQEIDGNSRESPPADKIPSKSGRKRRRGQSS<br/> RATSEQDAEDSEIQSEPAVGGRRKRQQSAANGSSGVVGT<br/> PGAKRYNFRHSTIASSVATQAQSVDAKDKD</p> |
| Sco2 | onekp:QCGM_scaffold_2076231 | Saxegothaea_conspicua       | <p>SPVNEIEIWRRLKKVGLDEETLQKKDKAALIAHITKLESELYDY<br/> QYNMGLVLLERKEWTSKYEQLKISAEAEAGNYMRDQAAHSAAL<br/> ADAEKREESLRKALGIEKQCVADLEKALHEMRAESAIEKFVSEN<br/> KLAQACELVAATEDKSLAAESKLHAGEALQAEANRKRADAERML<br/> QVEVEAREDELRRQRQAFKSECEAHEKELYFERQTLLEWQKKL<br/> QEGQDRWLEGQRLLNQREEYIIERSEATKQIEKELQDVKRKVE<br/> KEQSTLKEKEADMTLKLSDLTIREEALIERETVIDKKEQELLLL<br/> QEKLATREREEIQRITDVHQAVLEARTLEFEAELEQKHRAV<br/> DDELENRKNAAADTRELEINCKEELNKRGGQLEKKIEKFEKE<br/> KELDAKLRALKEREFKIDEKEFQTQKKLEAKRQEMNNLKL<br/> VLEKMKASLEEDRHLIHKEQEKVLTENERNDMKIIQTKL<br/> KDEIDNLRAKEQELSCKEDLLNVEKEKFEREWEILDEKTE<br/> QLRKELEQVDEEKRRVSKWLKDEEERFKQERRVLRREQI<br/> KSDEEALRLKKEAFASSKRHEEAELLAKFERERADLYR<br/> DIELQTSELEKSFQQRREELERHYQDRESAFQKEKQKEM<br/> QQIVAQKEISDKELEQIQLERQLDREWKETATTREQTDRE<br/> WSEMKKDIEELQIQKDKLKEQRSLHNERQELEAQLK<br/> LKAELKMTEDSLKLSEQQISQVNVNDCEVISAQQFDGCG<br/> SSQAIRQNVSAIPCKTDDFRSEIYLGETPASALDTPSPLG<br/> WLQKCASRIFKQSPGDKIDSDKQSEIAANFVSERTMGV<br/> RVDPPSSGKCKIDFLAEKAKCSSERQDEKLYSVPVSKIT<br/> TTQPSS</p>                                                                                                       |
| Sdi  | Sceptridium_dissectum       | onekp:EAAQ_scaffold_2015195 | <p>MFTPQRRGWPGWSFPPSADKKDKGKVLSPFRAPGSNDVSPV<br/> KSLIEAPPVASLEDNGGILVRSEHEIWRRFRDAGSLDENSLE<br/> KKDRAALLVHVS NMEAELYDYQYNMGLLIMERKEWDSKHEK<br/> LRAAVLEAEENLKRELAAHLIAISEAEKREESLKKALAVEK<br/> QCVTDLEKALKEMRAEVAELKVTAENKLAQARDMIAS<br/> TEERSLLAESKLHAAEALAEAAARKKADAERKLQEV<br/> EAR EDAMRRERHSAKAEREAHESELNRERQNL<br/> RDWERKLQEGQERLLEGQRILNQREEHTNQRDEALKQ<br/> LEKDLQDARKHLEKERTVLEQAEADLNA RLAALAVRE<br/> ENAVKQEISIDKKEQELLLLQEKLASRERALEMHDQHV<br/> KETETFVSKERDRLEALERTMKLKEESLPELEKKKVE<br/> CEEMLAELEKQHAAL EETEKLNSKASILASEADMERK<br/> DEKITKREQQLEKKTEKLKEKEKELDAKTKAAKEK<br/> DRALKSEEKQLDAQRRMIAEEREAVKALKEEIE<br/> NLRKELEVEKKQVLEEREKLRVTEQEREDLLKM<br/> QTCLKEEIDDCRAQTKIVSVQAEELKKERENFERE<br/> WDILDEKREQVRKELEQAEQEKRVAKWLQDEEARLK</p>                                                                                                                                                                                                                                                                                                                                                                          |



|        |                 |                                           |                                                                                                                                                                                                                                                                                                                                                                                                                                                                                                                                                                                                                                                                                                                                                                                                                                                                                                                                                                                                                                                                                                                                                                                                                                                                                                                                                                                                                                                                                                                                                                                                                                                                                                                             |
|--------|-----------------|-------------------------------------------|-----------------------------------------------------------------------------------------------------------------------------------------------------------------------------------------------------------------------------------------------------------------------------------------------------------------------------------------------------------------------------------------------------------------------------------------------------------------------------------------------------------------------------------------------------------------------------------------------------------------------------------------------------------------------------------------------------------------------------------------------------------------------------------------------------------------------------------------------------------------------------------------------------------------------------------------------------------------------------------------------------------------------------------------------------------------------------------------------------------------------------------------------------------------------------------------------------------------------------------------------------------------------------------------------------------------------------------------------------------------------------------------------------------------------------------------------------------------------------------------------------------------------------------------------------------------------------------------------------------------------------------------------------------------------------------------------------------------------------|
|        |                 |                                           | <p>QEKRSRLREQITRETEALRLEKEAFVNSVEHERAEWFVAKVDKEREDLVRD<br/> IDVRKRDLERTMEKSKEEFKQIKERELRHKRTERERQNSSAVRALAE<br/> KELQDVRQERQKLEKERQEILKNREDSEKDWVDIRKDIEELHIQREKLK<br/> EQREALRRERDDILQEAEKLLKREELKVTDDSVKSEQRSQRNDVEVVS<br/> PNMGLVSQPLENGAIFETGQASQLPNTGKSPAGNTPGKSSGTPGRLS<br/> WLQRCASALFHTPDKKGALNMKVRTESEPETDLEAHTGAEPSNFVYE<br/> VNDNKLHRNSVVEEGMPAQQRSSGSFTPDQLTDGENSQPPVQR<br/> WKGKGFTRTRSIRAVVEDAKAILESYPDGGGDNELPNGSGDEEKVLA<br/> QDIEDEGKQGDSSTPVTIENDKGNLKNQGRKRRRPPQSKALTEQE<br/> VEEAETESEVATGGKRKRQRDTGSSMKGEPGKETPGAKRYNFR</p>                                                                                                                                                                                                                                                                                                                                                                                                                                                                                                                                                                                                                                                                                                                                                                                                                                                                                                                                                                                                                                                                                                                                                                            |
| Sfa1I  | Sphagnum fallax | Phytozome<br>12<br>Sphfalx0064s<br>0083.1 | <p>MFTPQGRRGSPQSRQPLLRMTARDNGKRGSPNTNIGSSMAAGGDEA<br/> LALVEPPTIMSAGRNGGEGTPESEDIWKRQFEEGALDMPSLERKDRAA<br/> LHARIATLESELYDYQYNMGLLLLQRKTWTSQVDELKGAIAADAHETLQ<br/> REKAAHLELSEALGRLESTQKALELEKQCVIDLETALKEMQAEESAVK<br/> QAAERQLALAKEMAAEIDQKSLQADVKLSQAQVLHAEASRKLTESEHR<br/> LHEIEAREDALRRERHSIFADVDAQKEQIKAEGESLHAWEKRLDDARA<br/> RLQDGDRLNREEELNQREEVLKQRTNELEETRSFLDKERTLIQKSDN<br/> ELNARALTVEKEKALTERDLGVSKREQDFAILEERLAGRELAFEQHEQ<br/> HVKETEYVAEERSRLDAFNDGLKLREEAIGEHKQELVVLKQQLESQTS<br/> EMELQKADLEEATQELQKVRELLVADRMVLDQAMATAKAQDHDIDL<br/> QLLEIKVREQEVTQKMEELKERETTLDTQYHEVMELEKAVRVEETKHLR<br/> EYQRITELNEEVEQATKEIEADKLLIEEKQQAEEERHLRRECELERQEIE<br/> EEREKLLQDWELKREHLEIEQQDFQKKLDLQKQEI DSERENLRLESEK<br/> ERLQKELHNLREMLMSEVQLERKNLQTQIELDKNQVLEDREKARREIE<br/> VEMDLVAEERERVKNELDIKRKLLLESEKTHAAIASEKQKLEEEQEKLK<br/> ALETERQELLTIQVHLKQEIDEIRSHKQIVEKEAQELKRHKEQFEREWEL<br/> LDEKREATKKEHERFEEESKRMAEWMRDEEERLKKIRSEVEEWSRIATE<br/> QLQQERGSWVKQMETDRAQLYAQIDSERQDLVHNLELQRSNLDRW<br/> VEQERDAMERKFEEAERQLRMEIDQERKDLKMTGHSVSVELEQLHLE<br/> RVKLEQERQDLVQQREEAEKEWKEIKNDIQQLHVQGEKLEQRESLHL<br/> ERQGTIREMMRLQKLRDELKEAEGSMSIQASELPATAEQEVVSLHQQ<br/> GIQVSQQVTETPIEPVMLASTAHPSSRMVARTPGRLSWLRKCASRAS<br/> QLFSSASDVKAIAEAQEAETLNITASRPGDEADPLKAVNQSSSFNQSQ<br/> LAQVISHEDDSLHVDAANTDLPPYGEQHDVVGIGEEASESSRQGLHEE<br/> PAVNVATPATSIDTQTGTKRRRQNSGSAQDPDAEIESETGSRTPRRKRL<br/> RNSQVEDGSKFNSALNNRSSLMTTPGAKRYNFRPTTIVSSIATQSMSQ<br/> EGSGLHQDRHGKRAAWSNGSQAANDMTEVSSSEPANVLDGHEQA<br/> LITVAEVVEIPDANEHGETVEVGKCTQVTVVETVVEKVVETSIVEITEA<br/> MPEVVLQGEVQEGSRDPVIEEQATIQREDQGVQTEEGSDGTDG<br/> EEASDEIGDSGEDSEKGNEEEELEDEDEIEEEDENAGELLTDEAVDEDD<br/> EAEIEAQEECEEEEEENNDEDETDEELPPTFGKELWDFFTT</p> |
| Sfa1II | Sphagnum fallax | Phytozome<br>12<br>Sphfalx0064s<br>0084.1 | <p>MFTPQGRRGSPQSRQPLLRMTARDNGKRGSPNTNIGSSMAAGGDEA<br/> LALVEPPTIMSAGRNGGEGTPESEDIWKRQFQEDGALDMPSLERKDRA<br/> ALHARIAALESELYDYQYNMGLLLLQRKTWTSQVDELKGAISDSHETLQ<br/> REKAAHLELSEALGRLESAQKALELEKQCVLDLEMALKEMQAEESAVK<br/> QAAEKQLALAKEMAAEIDQKSLQADVKLSQAQVLHAEASRKLTESEHR<br/> LHEIEAREDALRRERHSIFADVDAQKEQVKSEGESLRAWEKRLDEARG<br/> RLQDGDRLNREEELNQREEVLKQRTIELEETRAFLDKERTLIQQSDNE<br/> LNARALTVEKEKALTERGLGVTKREQDLVILEERLAGREQAFEQHEQH<br/> VKETEYVAEERSRLDAFNDGLKLREVAIAEHKQELVVLKQQLESQTS<br/> MELKKADLDEATQELQKVRELLVADRIVLDQAMASARAQDHDIDLQL</p>                                                                                                                                                                                                                                                                                                                                                                                                                                                                                                                                                                                                                                                                                                                                                                                                                                                                                                                                                                                                                                                                                                                                                                  |

|        |                 |                                           |                                                                                                                                                                                                                                                                                                                                                                                                                                                                                                                                                                                                                                                                                                                                                                                                                                                                                                                                                                                                                                                                                                                                                                                                                                                                                                                                                                                                                                                                                                                                                      |
|--------|-----------------|-------------------------------------------|------------------------------------------------------------------------------------------------------------------------------------------------------------------------------------------------------------------------------------------------------------------------------------------------------------------------------------------------------------------------------------------------------------------------------------------------------------------------------------------------------------------------------------------------------------------------------------------------------------------------------------------------------------------------------------------------------------------------------------------------------------------------------------------------------------------------------------------------------------------------------------------------------------------------------------------------------------------------------------------------------------------------------------------------------------------------------------------------------------------------------------------------------------------------------------------------------------------------------------------------------------------------------------------------------------------------------------------------------------------------------------------------------------------------------------------------------------------------------------------------------------------------------------------------------|
|        |                 |                                           | SEIKMREQEVTQKMEELRERETALDTRYHEVMELEKGVHVEETKHRLE<br>YQRITELKEEVQQATKEMEVNKLKLIIEKQQIAEEREHLRQCELERQEI<br>EEEREKVRKDWELKREHLEIEQQNVRKELDLQKQEI D SERENLRLELESE<br>KERLQKELHSLRETLMSEVQLERKNLQTQIELDKNRVLEEREKARREIEV<br>EMYHVAEERDRVKNELDIKRKLLSDESEKTHAAIASEKQKLEEEQEKLKA<br>LETERQELLTIQVHLKQEI DEIRSHKQIVEKEAQELKRHKEQFEREWELL<br>DEKREATKKEHERFEEESKRMAEWMRDEEERLKKIRSEVEEWSRIATE<br>QLQQERGSWVNQMETDRAQLYAQLDSERQDLVHNLELQRSNLDRW<br>VEQERDAMERKFEEAERQLRMEIDQERKDLKMTDGSVSVLEQLRAE<br>RLKLEQERQDLVQQREEAEKEWKEIKNDIQQLHVQGEKLRQRESLHL<br>ERQDTMKETMRLQKLRDELKEAEGSMSIRASELPATAEQEVASPPQQ<br>DLQVSQQVTEPQIEPVMLANTAHPSRRMVARTPGRLSWLRKCASRAS<br>QLFLSASDVKAIAEAQAENFNITASRRGDETGPLKAVNQPSSSFNQS<br>QLAEVISHEDDSRHVDAANMDLPPYEEQRDVVGVIEEAAESSRQGLH<br>EPAVNVATPAMSIDTQTRAKRRRQNSVSAQDL DSEIESETGSRTPRR<br>KRLRSQVDDGSKVDSALKNPPSLVSTPGGKRYNFRPTTIVSSIATQSM<br>SQEGSGLHQDRQGKRAAWSNGSQAANDMAEVSSSEPANVVDGH<br>EQALTTVAEVLEIPDAEHGETVEVGVNGTQVTVVETVVKVETSIVEI<br>AEVMPEAVLQGEVQEGFRDPVIEEQAAIPEQIQREDLGVQTEEDSEG<br>TDGEEAIDETGDSGEDSEEGNAEEEESSDDEDEIEEEDENADELVADEAV<br>DEDEVEVEAQEEGEEEEEDKNDEHETDEESPTTFGEKLDWDFTT                                                                                                                                                                                                                                                                                                                                                                                                                            |
| Sfa2I  | Sphagnum fallax | Phytozome<br>12<br>Sphfalx0160s<br>0012.1 | MVSKIDGDANKMYTPQRRGPQSLRALAREKGVVVTYPPLPTQAEEDK<br>VEPPMTPPEEAIHAKALEVISGGGGEGMPPDGDISRHIQFEGSLDVPSL<br>EQKDWAALQARISGLESELYDYQFNMGLLLLQRKDWGKQMDQEKSA<br>VTKAQDMLQQEKAHSHLEL TEAQKH EEA AKRALNTEQQCVADLEKVL<br>KEMQAEGFEVKEAADRQLSQA KEMLASVEEKSAQADTQLAKVQGER<br>TQTNRKLAE SQLQREVEMREDALRREHRLMSEIEAQKAQMVQEESS<br>TLREWERELIGKQEQ LHEEEQKLNEREELINRFETLKQSEKGLVTC<br>MLERDQAVLEQSEAELISRTVVVTDREEV LKEKDVAIKIREQELLVVEER<br>LAGRQRVFNQHEEHVKDTEAYVAREREWLDAFDMGVKMREEAVAE<br>HKQELVLLQQVLESQTQEVDMKKSELERATLEKQVQELLAFERKEVD<br>NAKVATEKREADICQLES AIIDKEHDLQVKVVEVEERELSLDLRLQKVEN<br>LEKAVVVEGNKYKAHQKIVPLNEEISRDRSDLEIVQKELHIENQQVKA<br>EYEH LRKEKELDRQQIEDAWAKVRKDWELEKGMEEERKKVEDEISGK<br>WQQLHLHKEMLHKEFQQKIRELENETS AERERLKEVYLERRKLQDEN<br>EVDREKAVQERDKAWMEIAEERQQAQHQEDLKVQEQLEQQELANVQ<br>LQLKQELDEIQAHKCFVDEEAKELQMQKEKFEQGWELLDEMKT VVK<br>DAEKFGEEKCRSKWLERSEEQLRISKLEIEEQSLKMAEELKRERDAWK<br>TKMESERTQLYAQLDAEHQVLVHNLEMQRAEFERLVSWEVIEKQME<br>ECEAHLQSEIEKENEELKRKRSLMEMEQLELEHQKLEGEWQDLGKQ<br>REEADKERIEICKDIENLDLQLKQKLEQHQLHQEREEVLHAEKHLKLR<br>TDLTEAENSLHTAEP AIHHQTML EARSPPQQEVNPIPIQEMTPSVPEH<br>ATSISRSPGKIAWLWSCASHAAQLFSQPSAVTGMVADIPDTRKGGTTLT<br>ESSEHGDTPKLKHSPRLNQS QLAQVVVTEKQMMPYKRTQSIRAVVED<br>AIRMLGSETPHRVSNKQKSAAGDLDTPTGKKRSHEVAAKEQDEDET<br>KSEVGGKPKHRRRLHDILLVSTGVPNGVSLHGD MHSLPIVSPGSQRYD<br>FQSTTIANILLSPTTSRDVEGTDHFQDVNAERTVLSTGPD RARKSNLPA<br>TASSALS NVP GAKDVLLNESSKLP EGHVAVTQDGKLEVEVAKITDEN<br>KKEVDKKEDEEDREDEDEGEENDLDDDQTEMGVVAADKETEEQE<br>DGEDDVYDDEWQA HEDAKDAEKDKEDEKPM TLGKFWNFLT |
| Sfa2II | Sphagnum fallax | Phytozome                                 | ISRLLIQTKDLYSCFGVCVWDQLEKALKEMQAGGFVKEAAERQLSQA                                                                                                                                                                                                                                                                                                                                                                                                                                                                                                                                                                                                                                                                                                                                                                                                                                                                                                                                                                                                                                                                                                                                                                                                                                                                                                                                                                                                                                                                                                      |

|      |                 |                                         |                                                                                                                                                                                                                                                                                                                                                                                                                                                                                                                                                                                                                                                                                                                                                                                                                                                                                                                                                                                                                                                                                                                                                                                                                                                                                                                             |
|------|-----------------|-----------------------------------------|-----------------------------------------------------------------------------------------------------------------------------------------------------------------------------------------------------------------------------------------------------------------------------------------------------------------------------------------------------------------------------------------------------------------------------------------------------------------------------------------------------------------------------------------------------------------------------------------------------------------------------------------------------------------------------------------------------------------------------------------------------------------------------------------------------------------------------------------------------------------------------------------------------------------------------------------------------------------------------------------------------------------------------------------------------------------------------------------------------------------------------------------------------------------------------------------------------------------------------------------------------------------------------------------------------------------------------|
|      |                 | 12<br>Sphfalx0008s<br>0238.1            | <p> KEMLASVEEKSAQADTQLAKVQGERTQTNRKLAESQLQLQEVEMRED<br/> ALRRLKPRKHRWCKRRSSTLREWERELIGKQEQLHEEQKLNEREELIN<br/> NRFETLRQSEKGLEVTCAMLERDQAVLEQSETELISRTVVVTDREEVLK<br/> EKYVAIKIREQELLVVEERLAGRQQVFNQHEEHVKDTEVYVARERERLD<br/> AFDMGVKMQEDGVAEHKQELVLLQHVLESQNPRLISRKRKEVGNA<br/> KVATEKQEADICQLESAIIDKEHELQVKVVEVEERELSLDSRLQEVKNLE<br/> KAVWVEENKYKAEHQKIVALNEEISRDRSDLEIVQKELHIENQQIEAEYE<br/> RLRKEKELDQQQIEVAWAKVQKAWELEKGMEEERKKVEDEINGKRK<br/> ELLHKECQHKIQELENETSAERERLKKEVYLERNKLODENEVDREKAVQ<br/> ERDKAWMEIAEERQQVAQQQEDLVQEFQGGQELANVQLQLKQELD<br/> EIRAHKCFVAEEAKELQMKEKFEQGWELLDDEMKTVKKDAEKFGE<br/> SKCRSEWLEHSEEQLRISKLEIEEQSLKMAEELKQERDAWKTKMESERT<br/> QLYAQLDAEHQVLVHNLEMQRAEFERLVSWEKEVIEKQMEERESHLO<br/> SEIEKEKEELKRKRSLVEMEQLLEHQKLEGERQDLGKQHEEADKERI<br/> EICKDTENLDLQLKQKLEQHQLHQREREVLHEAEKHLKRLTDLTEAEN<br/> SFHTAEPAIHHQTMPEARSPQQQEVNPIPFQEMTPSVEHSGSISRSL<br/> GKIAWMRSCASHAAQLFSQPSAVTGMVADIPDTRKGGTLTRLNQ </p>                                                                                                                                                                                                                                                                                                                                                                              |
| Sit1 | Setaria italica | Phytozome<br>12<br>Seita.1G2927<br>00.1 | <p> MFTPQGGKGTGWSTPTPANQRSGGGAPAASAPLGKGGKRVTELEH<br/> ELHEYQYNMGLLLEKKEWAEEKLEISQRLKQKEEILKREQAHLNAISE<br/> YERREESMRKALGVEKQCVIDLEKALREIRAEIAEVKFTSEKKITDAQSLE<br/> ASLEEKSLIEGKLHAADAKLAEANRKAQVDRDLEEV EARQRRLEKEK<br/> LYFETERKAREKQLKEQEEQLQEWKLLKESQNRVLDLQRSINDREERA<br/> NKNDQLFKIKHDELEEARKSVEATKLTLLKAKENDINKKLNELHSKEKDA<br/> DSKRKELEEREKLIEREKASIREKEGLQKLEDHQVELKSKRRDFELELE<br/> SERKSFDEKMTQKQADLVKREKDVKSLESKLSKTEQALNDKKTVEGW<br/> QNDLDAKSKALKRWEEESLKNDEKRLLEEKQHMDQEKKQVEVSKSELE<br/> RIKSRLEAEKERILEAQNNLKLTEERQEHSVLTERRKKEIEEYMRNNSL<br/> SEEIEDLRKQRQKFEWEQLEDEKRAHLAEEDKVKIERNMLERWRDS<br/> EEKRLNDAKFEMEEKYKEQLENLDRKERVLNDDIKHKQMENDELKGE<br/> RADLQRQLQLHRHELEMEMEQKQASKEKELEDKANELNKKRDFVDN<br/> KLRHAIELNESKIQKIIESEKLLAEERKILLEERQKLETDOADIKRDIDSLHG<br/> LSQSLKVRREAYNRDMKNLIDLFKYKVKCNCGITLFEGLDSLALKDSAE<br/> IEHPSLAVERDHRSLNADTSAPDTGTLVNSGGRLSLQKCSRLFKFSPK<br/> KGEQPTENIPFGARLEEASQSDGDYEPTPVYEAHDSFGAEDDLPSESG<br/> ARDNDESERHDPADDVQMESSVGVADNSIDILGAQSFDTNDRAVD<br/> ATIASTDQNGKDPAPAEADLPETSKQGRRQQRNRKGRGKGGVKRT<br/> RSVRAVEDAKAILGETFEKNDGQGDSVAAVGGTRKRRFTGATISEQ<br/> DEEGSEAHSESVSLGGQRRRRTAGAVTETPGEKRYNLRSTVANAT<br/> AATAQTDKKAATGSKHMQATADDTEGTSKADDEEPAPESKKASES<br/> ADYGASQLHEFSQAEIGDAHAPAEGTGEEDGDVVDGKDALPDVPMPT<br/> PSGSELGAEQDDEDDDDSERRNQSISKKLWSFFTT </p> |
| Sit2 | Setaria italica | Phytozome<br>12<br>Seita.5G3312<br>00.1 | <p> MASPRSAGAGGGVAGDEAIWRKLREAGFDEDVRRRDKAALIGYISR<br/> LESEIYDYQHNLGLILLEQKEVTSKYEQLKAASEATEIMLKRERAAQQA<br/> LAETRKREENLKKNLCIQKECVSNLEKALHDMRGETAEIKVSYEAKLVEA<br/> LQMIDAAQKFFDEAEKLLAAKSLEAESIRTHNASLRLSQDIEDREDQL<br/> RRDRTSFELESASKEKEISLQRKLLDDTKKILHEKEQALVKEQALLNQRD<br/> DNILERLGYITHSEKRLEEEKLNLEDERKALMEEKNKLDLKMQAISREEA<br/> IIKKESVLDKRESELLVLQETIASKERAIEIRLQEQEIDLGRRRNEFDTE<br/> MEIKLTSFKEIEARKTLLDQRESALSEQEDAVAQREQNINLRLAELSNK<br/> EESLVKRSDELKEERKLSHRDVTVHSELQKEREIEIQNMKLDLEKEKSF<br/> EEEKREAIQAQEKLLITQSEREDLLILQMKLKEEIDSLRAQVELMVDAAE </p>                                                                                                                                                                                                                                                                                                                                                                                                                                                                                                                                                                                                                                                                                                                                                  |

|        |                        |                                 |                                                                                                                                                                                                                                                                                                                                                                                                                                                                                                                                                                                                                                                                                                                                                                                                                                                                                                                                                                                                                                                                                                                                                                                                                                                                                                                                                             |
|--------|------------------------|---------------------------------|-------------------------------------------------------------------------------------------------------------------------------------------------------------------------------------------------------------------------------------------------------------------------------------------------------------------------------------------------------------------------------------------------------------------------------------------------------------------------------------------------------------------------------------------------------------------------------------------------------------------------------------------------------------------------------------------------------------------------------------------------------------------------------------------------------------------------------------------------------------------------------------------------------------------------------------------------------------------------------------------------------------------------------------------------------------------------------------------------------------------------------------------------------------------------------------------------------------------------------------------------------------------------------------------------------------------------------------------------------------|
|        |                        |                                 | <p> RLLAEKERFEIEWELIDEKKDELQKEAARIAEERRVIDEHLKNELDVIKQE<br/> KENLRIQFKSSAESLACEHKEFMNKMQQEHASWLSRIQQEREDLKRDI<br/> DIQRTELMNSAKARQMEIESYLREKEEEFEQKKSKELEYINSEKETISSKL<br/> EHVRIELQKLEDERKEALLERARREQELSEIKSTIDALNEQREKLQEQRKL<br/> LHSDREAITQQIQQLNELEELKIESENQLSLRQCGRSKHGDVETQKEN<br/> GVHLSPEDEDQNASPKKCSSPKVILGKKLEVSPSVSTPISWVRKCAQVIFK<br/> RSPEKSADHDNDRSAHATLGNVNDFLVENGGLFACQLENGAGEVPH<br/> AVDGLKVGKKRLNYALSHDQSENLEPKRKHQRSSILTQKVVGGEIDSN<br/> GSPSVLEEKCSKNEHDAVLVGLSRKGLPYPRTEGEVASSDDALFVNGKP<br/> DTSIPDDEPSEEISVSAAEALNGDVAEDKDELEDSDDEGEEEEEEKA<br/> SSAKKLWRFLIT </p>                                                                                                                                                                                                                                                                                                                                                                                                                                                                                                                                                                                                                                                                                                                                                                 |
| Skr    | Selaginella_kraussiana | onekp:ZFGK_scaffold_2042863     | <p> MFSPQRRGGAATPGRVAYTVSAEKRLAPADGSPGSAAGAAMMVERS<br/> AAIIDLEAPKSPGEIWHSEAGSLDEESLEMKNRAALIEHIAKLERELYQ<br/> YQYQMGLLIIEKKEHASECDRLNLVLEETREVLKREQSAHMLLALSEAEK<br/> REESLKKAAATERKCVADLEKAFREVNTEMAEAKAAAEKIANAKVAA<br/> QSAEDKRLEAESRLHSAEALHAEANRKLAEADRKLQEVDSDREDALRRQ<br/> RHTSKAECEALKMELENQSRDLKQWEKTLGDRQDRLLESERLLNMRE<br/> ASIEDRAQALKEMEENIDRLQRALDKDRESLRHAEADYSSQMTEVSVK<br/> EEAAVARENAALKKEQELLLLQEEIMRRERLNDKHKQQTRERETEIAKE<br/> HDRLKALEAELNARREVLAEERQNL </p>                                                                                                                                                                                                                                                                                                                                                                                                                                                                                                                                                                                                                                                                                                                                                                                                                                                                         |
| Sly1I  | Solanum lycopersicum   | Phytozome 12 Solyc03g045050.2.1 | <p> MSTPPRKVFSGWTLTPRTLANKTVSKGKDVVFMGSGQKVLSSIQDY<br/> DTVDKVVLDDKVSLENELVDYQYNMGLLIEKKEWSAKLEEIKQALSE<br/> ANEAYRREHTAHLIALSEVEKREENLRKALGVENQCVRELEKELREMRS<br/> QYAETKYVADSKLDEAKALATSVEENSLHVELKLRAADAKTAEVSRKSS<br/> DVERKMRDIEAQENALRRERSSFNTEREAHESAISKHREELREWKRLLK<br/> EGEERLADARTLLNQREQRANENDGILRQKQSDLEDEQRKIDIANSVL<br/> RKKEVDMSSRLAILASKEKELEDVRKSLEIKKEEDELQEKLNAKEREEIQ<br/> KLMDEHRAILKSKEEFELEMRQRHASLDEELENKVIELEKKEAEVGHIE<br/> EKLKKREQALEKKSDDKMKKEKEKDELELKLKALKEREKSLKIDERELETEKKQ<br/> IFTEKDRLLDLRVELENRRAELEKQQLKINEGIEQLKITEDEKMEHARLQ<br/> SELKQEIDKCRDLRDTLLNEAEDLKQEKERFEREWEELDEKRSAIKKEIQ<br/> EVNDSKKKFEKLQHTEEERLKKKELETENYVQRELEALKVAQETFAATM<br/> DHERSVLSEKTQSEKIRMLHDFEKQQRDLESEMQRKREEMESALHEQK<br/> KRFEERQRELSNANYLREVAHKEMEVMKSERVRLEHEKQEISSNKM<br/> HLVEQQSEMKKDIDVLDGLSRKLDQREAFAKERERFLAFVKKQENCS<br/> SCGEGIRIFELSDLQPLNDVVDLEAPSLRNVAQEYLTDFGQDTPVRANN<br/> ELLPGALNSGSMASAGTMSWLRKCTTKLLKFSQKIEHPASQDLIGGS<br/> SPEEFEGELPDTMVKKDQVDLAIKIDTFDDQKLQTDNSVREVEVGK<br/> DVPEDSQHSNRNSQRRPVRKGRGKNSKTGHTNSKATSAKIILGENVKE<br/> SENILVNGGFETSINVNESQKEDSSLFGEAPSKTRKRTRIHGTASEFDGS<br/> HSDGQSDSVTTTSRRKRRQKAAPSVQAPGEKRYNLRHPRSAAVATAN<br/> GSLPELVSKSQEENGDSKVVVPETPAAISDGELRNSDAALPAVADSPLEIA<br/> ADDQACAGDIANELVDDTGLSEEINGTPEGPSAYNVYDEEHEGDTIVQ<br/> EEDGERDEDADENDELDEGNEEEEVPHPGEVSIGKKIWSFITT </p> |
| Sly1II | Solanum lycopersicum   | Phytozome 12 Solyc02g089800.2.1 | <p> MDQEELIEKVSLENELFDYQYNMGLILLEKKEWSSKFEEIKQTLSEESNE<br/> AYRREQAAHLIAISEVEKREENLRKALGVEKQFARELEKELREMRELYAE<br/> IKYTADSKLAEANALATSVEEKSLVEAKLRAADAKLAEVNNRSSEVERK<br/> LNEVYAQENSLRRERSSFNAERAYETNLSRQREDSQEWERKLQAAEE<br/> KLADGQRLNQREKRANDTDRILRQKQNDLEDEQRKIVTANSVLRKKE<br/> DDMGSKIEDLTHKEKELEDARKSLGIKERELLDLQEKLNKERDGIQNLMD<br/> DEHRSVLSKEKEFELELWQRRASLDEELKGVLELEKKEAEVNHMEEK </p>                                                                                                                                                                                                                                                                                                                                                                                                                                                                                                                                                                                                                                                                                                                                                                                                                                                                                                                                                           |

|      |                            |                                                             |                                                                                                                                                                                                                                                                                                                                                                                                                                                                                                                                                                                                                                                                                                                                                                                                                                                                 |
|------|----------------------------|-------------------------------------------------------------|-----------------------------------------------------------------------------------------------------------------------------------------------------------------------------------------------------------------------------------------------------------------------------------------------------------------------------------------------------------------------------------------------------------------------------------------------------------------------------------------------------------------------------------------------------------------------------------------------------------------------------------------------------------------------------------------------------------------------------------------------------------------------------------------------------------------------------------------------------------------|
|      |                            |                                                             | <p>IKKREQVVEKKTEKVKEKEKDHELKALKKEKEKSLKNEEKILGTERKQLD<br/> SEKGNLLALKAELENVRAELEKQQIKISEGTEQLKITEDERMEHSRLQSE<br/> LKQEIVKCRLLREDLLKEAEDLKQEKERFEREWEELDEKRSEIKIDLQELN<br/> ERRENLEKLRSEERISKEKLETDNYVQMELEALRVARETFEATMDHE<br/> KSILAEETRSEKSQMLHAYEQQKRELESDMQRKQEEMESALRVQEKLF<br/> EESQKELSNIIEYIKEITHREMEEMKLERVSLEKEKQEISANKGILEVQQ<br/> EMKKDIDVLVGLSRKLDQRLAYIKERERFIDVFKQQKSCSSCGEGIHVI<br/> EFSDLQALAEAEETFEAPPLPSVAQEYLKDGLOGSPGRASDELSPGALDT<br/> ASMVSAGTMSWFRKCTSKILKFSPSKNIGNVASDCLVDESSLQKCGAGI<br/> SPNKQSKEGNPMDLISIMNVLDDQRVQQDDGVREVKVGQDNVEDS<br/> HHSDMKAGQRRTVKKGRGRTSKTEKAANMTVLGKISKEGENITNGSL<br/> ETSVNMNEESQRGSGLLGGAPRNSRKRSHTSQGTACEIDGNNSEGQS<br/> DSVASIRGKRRQQAAPSVQAHAERRYNLRRPRSAAPAASYGSLPEPVV<br/> KSQEEENQNSKASLQTPQVNNSEDDVIDHPTVSESPFNDAVDNLESSANK<br/> VNELDDTGLSEEVNTPKRPSASSDEEGSDSDDEEEIEHPGEVSVG<br/> KKIWTFIT</p> |
| Sly2 | Solanum lycopersicum       | Phytozome 12 Solyc02g091 960.2.1                            | <p>MASPGSRLALTPVNPTPIISGLGRVSKTPLTDEVIWKRLREAGFDSDSI<br/> KRRDKAALIAYIAKLETELYDHQYQMGLLILERKEWVSKNEQSKAASES<br/> AELLYKREQAARLSDTAEAKKLEANLKKALGIEKCVANIEKALHEMRA<br/> ECAEAKVASENKLAEAQSMMEDAQKKYTDVEEKLKRAESLEAEASLFH<br/> RTAERKLREVESREDDLRRQTLFLKSECEAKEKEIQLERQSLSERQKTLQ<br/> RSQEEELLDGQALLNKREEFIFRSQELNRHEKDLEDEKSNFENDIKSLNE<br/> EKRNLEVKLKSLSAREEGIIRREHELYEKEKELLLQGGKIQSKEIDGSKQV<br/> MVNQEATLVTKISSIERCADTLLDRTPSNKRRREDGDFISQLTENGASC<br/> PLPPTPDAPDVENLEVLPNQTHIAAEETTUYIDKIVTVHEVTEIDVRKVT<br/> EGSPGTLSDSGRKGNGSLESQNGKPEGRARRTRATRK</p>                                                                                                                                                                                                                                                                                                  |
| Smo  | Selaginella moellendorffii | NCBI gi 30282387 2  ref XP_0029 93584.1  SELMODRAF T_431638 | <p>MFTPHRRGATPNRGAGFSVSTERREVRFASSPPDGRQQHQSDAGTL<br/> AGNGAGDGAGKSSSEIWQTFREAGALDQESLELKDRNALLAHISKLET<br/> ELYDYQYQMGLLLESNKLRGESERLKSVIDETRDGLKREQSAHMIALQ<br/> EAERREDSLKRAVTTTEKKCVADLEKALKEMHEEVAEAKAAAATQFQQ<br/> GKATAMSAEEKLLEAESKLHSAEALLAKANRKHADAERKLQEVESRED<br/> ALRRQRHSFLAECGAHKLELEHEKQNLKGWERTLEESQARFVENEKLL<br/> NKREEYMQQRDDALTKLERDLDEARKVLEKDRSALRQEQAQEYSALLSA<br/> LSLREEAAVERENAATKKEQEILLQEKLASRDRAFEQHEQMVRELEQA<br/> NAKEKERLVDLEASLSTRELLAVSKQSLVNIVFYVPHALICFCMVGGYL<br/> EDPG</p>                                                                                                                                                                                                                                                                                                                                               |
| Spo1 | Spirodela polyrhiza        | Phytozome 12 Spipo18G002 0000                               | <p>MFTPQPQRRGWSLTPRAAEKNGSTPSQGRSAGGGLMGKGGKGVALSE<br/> APPPPRASLDENGTEGSEEGRDAAVWKRFEAGLLDQASLEKKDREA<br/> LVQRISKLEAELEYEQYNMGLLIEKKEWTSKYEDLRQGLAEAEIILKRE<br/> QTAHMIALSEVQKREDNLNRALGVEKQCVTDLKALSEMRAECAEVK<br/> FTSDQKLAEAHGMMTSVEEKSLEVDKLAADAKLAEASRKSSEIERKL<br/> LDVTTRESMAQRELASINAEKQLMKDDLDRQREDLRTWERNLREGQE<br/> RLVESQSLNQRKRSNEHDVALKKREKELEAMREAIERSNLLLKEEED<br/> MGSRLTALAAREKEINIKMEGLEKKEQDLIALEDQLNAREKIEMQKLLD<br/> DHDAFLDSKKREFELEMKKRSLVEEELKEKLDSEKKAKEVSMKEEKIA<br/> KREQTVEKKTEKLKEEKADLDVSKALKKWEAAVKANEKSLDKQSKQL<br/> AEETQQLQASKSELEAEKAAVEEEKQSILTEKENLKVTEAEREHALLQA<br/> RLKQEIDECMILKGSLENEREDLRQERERFEREWDALDENRAGLAADL<br/> KKFNDERASFEEKWRTGEEERLKNEHQAAKDLIQKDLDDLNLKEDFER<br/> TILHERSELREMIEKERADAARALDRKHELEISMQNKLGEMEEDLRRK<br/> VAAFEAEREGELENIRSLRENAVAEVQKLSAEQRRFDREKQELAEQGGK</p>                          |

|      |                                |                             |                                                                                                                                                                                                                                                                                                                                                                                                                                                                                                                                                                                                                                                                                                                                                                                                                                                                                                                                                                                                                                                                                                                                                                                         |
|------|--------------------------------|-----------------------------|-----------------------------------------------------------------------------------------------------------------------------------------------------------------------------------------------------------------------------------------------------------------------------------------------------------------------------------------------------------------------------------------------------------------------------------------------------------------------------------------------------------------------------------------------------------------------------------------------------------------------------------------------------------------------------------------------------------------------------------------------------------------------------------------------------------------------------------------------------------------------------------------------------------------------------------------------------------------------------------------------------------------------------------------------------------------------------------------------------------------------------------------------------------------------------------------|
|      |                                |                             | <p>KLEEEAEIRNDVEALHALSQSLKAQREDFIRERDHFALVVEYKARKDG<br/> GAAIAEFAPSEIEDPGSLLLPSLAEGYLDERLKGKQAEASSPPSGGSPSG<br/> ASGGRMSWLRSTKIFSFVPRVEDEAAAPPSKVEDEAPSEAERV<br/> QSEGOARTEEEAPEELDGAGKEPEPSLPRDEADGGGKEAEGEAVIILPV<br/> GGQEEVQPKPQRVTKRKVGRPAKRGRPATKRTRSVQAVVEDAKAFPK<br/> EASSDRAGPSNGDANDGGAALHEIEESQGDSVHTDGRANVGQKRRL<br/> HQASETMAGEPDGEESEARSESISLDGRRKRRQMAVPEAQTDPADKRY<br/> NFRSTVANTVASTQAVLGAKAAVARPLSLDGEVSRGESEKEGTDKSQ<br/> SQKPVSAMVCEIQSREFYQEIQEEEEAAEEVETGMLVEGGGEEELGTAS<br/> SSSDEVGSSDSEEGRGGGDASISRRLWKFFTS</p>                                                                                                                                                                                                                                                                                                                                                                                                                                                                                                                                                                                                                                                |
| Spo2 | <i>Spirodela polyrhiza</i>     | Phytozome 12                | <p>MATTPLQREKGEKAVSPGVGYRTPVAMEPRVGSALKDEAIWKRLRDA<br/> GFDEGVIQKRDKAALAIYIGKLESEIYDYQHMHMGLLILEKKQWISKYEQV<br/> KASADSAEMVHKRELAALQSALSERKQENLKAIGIEKESIASLEKTIH<br/> EIRAQSAEAKVAAESKLSEAHKIMENAQKKFDEAQKRLREAESSCEAR<br/> RYERMAAIKLEHEVEAREDELRRRLVLFNSQCEAREKDISLERQSLYDSQK<br/> VLQEEQEKLLERQACLNQREEHVFRLEELAQYEQLEIVKQKLEVEQT<br/> LLKEEKNFALDVRTLATREESVIERESLLDKKQKELLILQEKLASREHDEI<br/> QRLKTDNECVLELRMSEFEAKLEERRKEVDDEIENRRLACAQREIDLNQ<br/> RTELIQERENALELQSAELTEKCKDFEELKLLLEEKELSLAAAEKTAEKKM<br/> LDMEKEKVEIKSLTLELEKMKQSLEAEKNEVLREKEKLDLSAIERNLILL<br/> MEKRLKEEIDSFRAQRAELMVEADKLKEEKEKFEREWELIDEKREELQR<br/> EADRIAEDRKSVCQYLKNEQESLKAEKEDLRNQFKGYYSLSHEREQFI<br/> GNMEREHSDWFSKIQRERDDLMEKMLQRQELENSIRKRRDEVDAY<br/> LREKEEFEREKTNELQQIYFQKERIAKELEHLATEVKKFEDEKMAIALDR<br/> EQREKEWSEIKCSIDLNLQREKLQKQRELLQADREEIFSQIQHLRKLLEN<br/> QCITSEHKSLNDSAKNGVLGDYANLQSAENRNAGNREQKNGTSEKLS<br/> PGNVPHKALGSISPPMSMTFSWVRRCAQIILGRSPEKVIDASSGKDTT<br/> GDSIQHGEISNLKEAEDNENSGSSEDADKSHPLIDADGEENIQCTDGP<br/> YSSTMGRKRLQSSPLSVDGDVHPEPFLKRQKESKELNFVNELPVTEVTS<br/> KCGSMAFDQTSEGGEMCEPCLEEVDPSSKHSEEIESSGCHPKDEEALV<br/> ADTSTLNCNDNVESGVYHGDDPSSNGQPLLKQPKDMLKRDS</p> |
| Spr  | <i>Spirogyra pratensis</i>     | NCBI GB SM01021289          | <p>MRNAFSPRLRLRTQRDADENMSNYNRIGSESIPSSSIMPRHRAQVEVIWT<br/> DAQGPVIDEVSVIRSERDALSIRLQELELEYGDYKQLQTEAAFDERDRCLS<br/> QFSTIQSQLKEMVEKFKLEKNAHQSTIASNTEKERKLRDALTHTQRTAD<br/> ELELALTEKNLEFDNFRQSLTSLENETIRKKCIAEEKILECEISLKESFLKGE<br/> YEKKKVEYESKLQETQITESNLRLEYLRLKDSQNEFQIQVSLKEQALKEM<br/> EERSRKLISEYEQMNEEMEAKMKTILEKEEEMESKEKELIHFENETKIER<br/> NELENLEKRLKEMQERLNEQEKLVIKENSFSETKMHLTSFEEALNFRQ<br/> ESIELKLNELSEKEMNEEKIKLLSLEENLKHKQVAVDEHKTALIKEINEL<br/> QFQREEMEKEKLFDFREKELNELNHTLRKQREGLNLERDALDSKESNL<br/> IDLERKLLKQKESMVEIKKESVEEKDNLNTNVKMNSASKMRELMEEKRQ<br/> LQEDLSRLGEDTTVLQRERELVKLMRESMDAAYSVMNEEKERIEQSAE<br/> ENERVRREA EKALDEARREKEDVFRFKDMVEIEREELREEKRRFEHAYE<br/> ELDAMKAILDEEKDEAKRMHEVRRRELEMQVMEINQMK</p>                                                                                                                                                                                                                                                                                                                                                                                                                                               |
| Sst  | <i>Selaginella stantoniana</i> | onekp:ZZOL_scaffold_2006248 | <p>MFTPHRRGATPNRGAGFSVSTERREVRFASSPPDGRQQHQSDGTL<br/> AGNDAGDGAGKSSSEIWQTFREAGALDQESLELKDRNALLAHISKLET<br/> ELYDYQYQMGLLLESNKLRGESERLKSVIDETRDGLKREQSAHMIALQ<br/> EAERREESLKRAVTEKKCVADLEKALKEMHEEVAEAKAAAATQFQQG<br/> KATAMSAEEKLLEAESKLHSAEALLAKANRKHADAERKLQEVESREDAL<br/> RRQRHSFLAECEAHKLELEHEKQNLKGWERTLEESQARFVENEKLLNK<br/> REEYMQQRDDALTKLERDLDEARKVLEKDRSALRQEQAQEYSALLSALS</p>                                                                                                                                                                                                                                                                                                                                                                                                                                                                                                                                                                                                                                                                                                                                                                                               |

|        |                      |                                                 |                                                                                                                                                                                                                                                                                                                                                                                                                                                                                                                                                                                                                                                                                                                                                                                                                                                                                                                                                                                                                                                                                                                                                                                                                                                       |
|--------|----------------------|-------------------------------------------------|-------------------------------------------------------------------------------------------------------------------------------------------------------------------------------------------------------------------------------------------------------------------------------------------------------------------------------------------------------------------------------------------------------------------------------------------------------------------------------------------------------------------------------------------------------------------------------------------------------------------------------------------------------------------------------------------------------------------------------------------------------------------------------------------------------------------------------------------------------------------------------------------------------------------------------------------------------------------------------------------------------------------------------------------------------------------------------------------------------------------------------------------------------------------------------------------------------------------------------------------------------|
|        |                      |                                                 | REEAAVERENAATKKEQEILLQEKLASRDRAFEQHEQMVRELEQANA<br>KEKERLVDLEASLSTRENLAVSKQSLEDI                                                                                                                                                                                                                                                                                                                                                                                                                                                                                                                                                                                                                                                                                                                                                                                                                                                                                                                                                                                                                                                                                                                                                                      |
| Stu1I  | Solanum<br>tuberosum | Phytozome<br>12<br>PGSC0003D<br>MT40000867<br>6 | MGLLLIEKKEWSAKLEEIKQALNEANEAYRREHTAHLIALSEVEKREENL<br>RKALGVENQCVRELEKELREMRSQYAETKYVADSKLDEAKALATSVEE<br>NSLHVLEKLRAADAKTAEVSRKSSDIERKLRDIEAQENALRRERSFNTE<br>REAHESALSKHREELREWERKLKEGEERLADARTLLNQREQRANENDS<br>ILRQKQSDLEDEQRKIDTANSVLRKKEVDMSSRLANLASTEKELEDVRK<br>SLEIKKEELDELQEKLNAKEREEIQKLMDEHIAILKSKEEFELMRQRHA<br>SLDEELKNKVIELEKKEAEVSHVEEKLKKREQALEKSDKMKEKEKDLEL<br>KLKALKEREKSLKIDEKELETEKKQIFTEKDRLLALRVELENRRAELEKQQL<br>KINEGIEQLKITEDEKMEHARLQSELKQEIDKCRDLRDTLLKEAEDLKQE<br>KERFEREWEELDEKRSAIKKELQEVNDSKKKFEKLQHTTEERLKKKELET<br>ENYVQRELEALKAAQETFAATMDHERSVLSEKTQSEKIRMLHDFENQK<br>RDLESEMQRKREEMEFALHEQKKRFEERQRELSNANYLREVAHKEM<br>EVMKSERVKLEKEKQEISSNKMHLAEQQSEMKKDIDVLDGLSRKLDQ<br>REAFAKERERFLT FVKKQENCSSCGEGIRIFELSELQTLNDVVDVDFEAPSLR<br>NVAQEYLTDGFDTPGRANNELSPGALNSGSMASAGTMSWLKCTT<br>KLLKFSPGNKIEHPASQDFIGGSSLEEFVGGELPDTMSKKDQVDLAVSIN<br>GTFDDQKLQTDNSVRVVEVGQDVPEDSQHSNINSQRRPVRKGRGKN<br>SKTGHPNSKATSAKIILGENLKESENTHVNGGLETSINVNESQKEESSLF<br>GEARSKTRKRTRIHTASEFDGSHSDGQSDSVTATSRRKRRQKAAPSV<br>QAPGEKRYNLRPRSAAIATANGSLPELVSKSQEENGDSKAVPETPAAI<br>SDGELRNSDAALPAVADSPLMEAADDQGCTADIANELVDDTGLSEEM<br>NGTPEGPSAYNVYDEEHEGDTIVQEDGERDEDADENDEVKGNEEEE<br>VLHPGEVSGIKKIWSFIT                                 |
| Stu1II | Solanum<br>tuberosum | Phytozome<br>12<br>PGSC0003D<br>MT40002604<br>1 | MSTPPRKSWTGWSLSPRTEPVDKGGKIAFTGTAHKSLSQDYGNMD<br>QEALIEKVKLENELFDYQYNMGLLLIEKKEWSSKFEEIKQALEELNEAY<br>RREQAAHLIAISEVEKREENLRKALGVEKQFARELEKELREMRSEYAETK<br>YTADSKLAEANALATSVEEKSLEVEAKLRAADAKLAEVSRKSSEIERKLN<br>AVYAQENALRREQSSFNAEREAYETNLSRQREDLQEWERKLQAAEKL<br>ADGRLLNQREQRANTDRILRQKQNDLEDEQRKIVTANSVLRKKED<br>DMSSQIEDLTHKEKELEDARKSLEIKERELDLQEKLNKERDGIQNLMD<br>EQRSVLHSKEEFELRQRASLDEELKGVLELEKKEAEVNHMEEKIK<br>KREQAVEKKMEKVKEKEKDHKLKALKEKEKSLNEEKFLGTERKQLD<br>SEKENLLALKAELENVRAELEKQKIKISEDTEQLKIIDERMMEYARLQSEL<br>KQEIDKCRLLREDLLKEAEDLKQEKERFEREWEELDEKRSEIKINLQELNE<br>QSANFKKLKCTEERISKEKLETENYVQRELEALRVAREAFEATMDHDK<br>SILAEETQSEKSQMLHAYEQKRELESDMQRKQEEEMESALHVQEKLFE<br>EERQKELSNIEYLKEITHREMEEMKLERVSLEKEKQEISANKGILEVQQL<br>EMKKDIDVLVGLSRKLDQRLAYIKERDRFIDVFKQKSCSSCGEGIHVI<br>EFYDLEALAEAETFEAPPLPSVAQEYLKDGLOGSPGRASDELSPGALNT<br>GSMVSAGTMSWLKCTSKILKFSKKNIGNAASDCLIDESSLSQKAGI<br>SPNKQSNKGNPMNLSVMNVLDDQRVQDDGVREVKVGQDNVED<br>SHHSDMKAGQRRTVKKGRGRSSKTEKAANTRTFGLKIPKEGENITNGS<br>LETSDNMNEESQRGSGLLGGAPRNARKRSHTSQGTASEIDGNNSEGQ<br>SDSVASIRGKRRQQAAPSVQAHAERRYNLRRPRSAAPATSNGLPDPV<br>SESQEEENRNSKASLQTPQVNNSEVVDKDRNFVIGHPTVAESPLNDAVD<br>NQESSANMANELLDDTGLSEEVNETPKRPSAYRDEEGSDSDSDEEEEI<br>EHPGEVSVGKKIWFIT |
| Stu2   | Solanum<br>tuberosum | Phytozome<br>12                                 | MASPGSGRLALTPVNPTPIISGLGRVSKTPLTDEVIWKRLREAGFDEDSI<br>KRRDKAALIAYIAKLETELYDHQYQMGILLIERKEWVSKNEQFKAASVS                                                                                                                                                                                                                                                                                                                                                                                                                                                                                                                                                                                                                                                                                                                                                                                                                                                                                                                                                                                                                                                                                                                                               |

|      |                              |                                     |                                                                                                                                                                                                                                                                                                                                                                                                                                                                                                                                                                                                                                                                                                                                                                                                                                                                                                                                                                                                                                                                                                                                                                                                                                                                                                                                                                                   |
|------|------------------------------|-------------------------------------|-----------------------------------------------------------------------------------------------------------------------------------------------------------------------------------------------------------------------------------------------------------------------------------------------------------------------------------------------------------------------------------------------------------------------------------------------------------------------------------------------------------------------------------------------------------------------------------------------------------------------------------------------------------------------------------------------------------------------------------------------------------------------------------------------------------------------------------------------------------------------------------------------------------------------------------------------------------------------------------------------------------------------------------------------------------------------------------------------------------------------------------------------------------------------------------------------------------------------------------------------------------------------------------------------------------------------------------------------------------------------------------|
|      |                              | PGSC0003D<br>MT40002604<br>1        | AELLYKREQAARLSDMAEAKKLEANLKKALGIEKECVANIEKALHEMRA<br>ECAEAKVASENKLTEAQSMMEDAQKKYADVEEKLKRAESLEAEASLFH<br>RTAERKLREVESREDDLRRQTLFLKSDCEAKEKEIQLERQSLSERLKTQR<br>SQEELDAQALLNKEEFIFSRSQELNRHEKDELEKSNLENDIKSLNEK<br>KRNLEVKLKLSAREEGIIKREHKLNEKEEELLLLQGKMQSKEIDDSKQV<br>MVNQEATLVTKISSIEAELETKRKLVEDEIQTKRRAWELKDMDIKSRED<br>LITDKEYDLERQSRTLAEKEKELEDKVHVIEEKERNLQAAEKEVELQRTV<br>LQQEREGISKMRNDLEKSLKMLDEKRKCVDHHEEKVEAMKNETQELLI<br>LETRLKLEIDMIRAEKEEIEMEADRLKAEKAKFETEWVIDEKREELQKE<br>AERVAEEKLAISKLLKDSRDSLKAEKNAIQEEYKQNLSELSRDRETFMYEI<br>ESERAEFWFKIQKERENFLLDVEMQKKELENRIEKREEIETDLKEKEKA<br>FEELKKRELQDIASLRETVEKELEHVGLELNKLD AERKEINLDRRRDKE<br>WAELNNAIEELKVQRLKLEKQRELLHADRKEILAQIEQLKKLEDVKIIPDR<br>IATPKKLHSGLPSNELKPSAKRLLKHASVLGSGLDGNGNNGVRQDTPSI<br>MKENGNSSSTLSTPFSWLKRCADTLDRTPSNKRRREDGHHFISQLTEYG<br>ASGTLSSPDAPDVEHLEVLPNHTPIAAEETTUYIDKIVTVHEVTEIDVRK<br>VTEGSLETLSGESGRKVGNGSLQSDKNGKPEGRSRRTKATRK                                                                                                                                                                                                                                                                                                                                                                                                                                                    |
| Sve1 | Sciadopitys_vert<br>icillata | onekp:<br>YFZK_scaffol<br>d_2045444 | MLTPKRRGWPGWSPTSRSPPGEEKAVAVAESGHAAGGSGSAGKA<br>PAEAPPRNFLDEKGGVLAAREEPEIWRRFRESGLDQESLEKKDRAAL<br>VVHVTKLEAELYDYQYNMGLLLIERKEWTSTYEQMKLALAEAEENLKR<br>EQSAHLVAITEAEKREESLKKALGVEKQCVADIESALHEMRAEIAELKFT<br>SENKLAQARELVASTEELKALAAEAKLHAAEALQAEASRKHATERKLQ<br>DIEAIESALRRDRQSFKSERDAHEVELSLERQNLLEWEQKLQEGQDRLL<br>EGQRLNQRQYTNQRDEALKQIEKELEDARKQIEKDHTLKTETADIS<br>VRLAALATREENAIKREIVIDKKEQELLVLQEKLASREHEEIQKLIDEHKA<br>TLEARKIEFEAELERIKISAEELAKRQSAELMEAEIKRKEEKIGKREQQ<br>MEKKAEKLEKEKEVDARSKALKEKERAYKNEEKALIEKKNIEREREEIN<br>NEKQELQKTKIAVEEEKQQIVNEQENLRVTEEEKNELLKLTQQLKEEVD<br>NYRARELEVEKRAQELKMEMEKFEKEWDILDERREQARKESKQVEDE<br>EKRISKWLRDEDERLKQEKALQERIQSEMETIRLEKEAFEASMHHERA<br>LWLENIRRQQADLVRDIELQRTELENSVEKRQEEIEKVLREKEIGFQKEK<br>EREMQHINAQRELASKEMEEMSLERHKFERERQEISKSREHAEREW<br>AIKIDIEELQIQGDKLKEQRECLHKEREEVLRMFELHKLKTDNSNVTEDG<br>LNLIANKGGFSQEVPTQNVFGTPASSAKVNPPELSSGRTFASASVTPAR<br>LSWLHRCATRFNQSPSPEKMDVSTVRKEETAKSPTVVPEGTYAESER<br>VTQEIIVGLEIDPAFSADEQNNDVAVETEKDEHGISSRPAVNFHSLP<br>SPSRGNGCKSNDKAKIKVFKRTRSMKAVVEDARGILEIPSDKEKTESGN<br>RQGHHQNELAVPDKREDKGERAGANNTNSAQEIDGNSNRESLANDKI<br>NSKAGRKRRRAHSSRATSEQDADDSEIQSELAAGGRRKRRRQGGTTNG<br>GSSVVGTTGGKRYNFRHSTIANSAATQTISMDVKDKTITCDEEEETKTL<br>QESPSGKVAINSQEASSDKNARVASVQESDKDIFPGAEHPQSFPNGS<br>EDAAEDQQEVSSRELTKSETGDRYVQSEEDESGNGEDEVQIEIEDEEIDE<br>LDDGDNDEEEDRNSSLRKKLWKFLT |
| Sve2 | Sciadopitys_vert<br>icillata | onekp:DZQM<br>_scaffold_20<br>56498 | SPVNEENEMWRRLEKVLDEETLQKKDKAALIAHITKLESELYDYQYNM<br>GLILLERKEWTSRYEELKLSAEAEAGNFKRDKAAHLAVMAEAEKREGL<br>RKALGIEKQCVADLEKAIHEIRAESAEMKYLSDNKLAQAHELVAATEEK<br>SLAADSKLHAGEALQAEANRKRADAERKLQVEAREDELRRQWQAFK<br>SEFEAHEGELFLERKNLQEWKLLQEGQERLLEGGQKLLNQREYVIERN<br>EATKQIEKELLNVKRNVEKEQLILKEKETDLRGRLLAALTTRREALVKCEVT<br>INKKEQELLVLQEKLASREHEEIRRLTDEHQAALDARKSEFEAELDKQRR<br>AVDDELENRRNAADTKDLELKCNEEKISNTEQQLEKTEKLEKEKELD                                                                                                                                                                                                                                                                                                                                                                                                                                                                                                                                                                                                                                                                                                                                                                                                                                                                                                                                                  |



|      |                 |                                         |                                                                                                                                                                                                                                                                                                                                                                                                                                                                                                                                                                                                                                                                                                                                                                                                                                                                                                                                                                                                                                                                                                                                                                                                                                                                                                                                 |
|------|-----------------|-----------------------------------------|---------------------------------------------------------------------------------------------------------------------------------------------------------------------------------------------------------------------------------------------------------------------------------------------------------------------------------------------------------------------------------------------------------------------------------------------------------------------------------------------------------------------------------------------------------------------------------------------------------------------------------------------------------------------------------------------------------------------------------------------------------------------------------------------------------------------------------------------------------------------------------------------------------------------------------------------------------------------------------------------------------------------------------------------------------------------------------------------------------------------------------------------------------------------------------------------------------------------------------------------------------------------------------------------------------------------------------|
|      |                 |                                         | <p>ARSKNLKEREKKYNIEEKDIENQQKKLELEREEMNNLKQVLEKFKATLEE<br/> EKQQIHKEQERLELTENERNELRIIQTNLKEEIDNLRRAEQELLKKEDAL<br/> NVEKEKFEREWEILDEKAEQLRRGLEQVDDEKRVSRWLKDEEERLKQ<br/> ERWMLRQQIKSDEEALRLKKEAFACSKKQEEADLLAKFQRRERADLYRDI<br/> ELQTSELENGIEQRQEELERHYQERELAFQKEKQKEMHYINEQKELSDK<br/> ELEEMKLERQRLEREKQEIAITRQQIEREWSEMKKDIEALEIQRQKLKEL<br/> RESLHKERKEFEGQLNQLKKLDELKITEDSLQSENPLSQANVNDREAI<br/> SPGHFDVYGISQAAFRQSVSVMPCNTDEFRSEIYPGGKLASASDTPSPL<br/> AWLQKCASRLFQKSP</p>                                                                                                                                                                                                                                                                                                                                                                                                                                                                                                                                                                                                                                                                                                                                                                                                                                                 |
| Svi1 | Setaria viridis | Phytozome<br>12<br>Sevir.1G2978<br>00.1 | <p>MFTPQGGKGTGWSTPTPANQRSGGGAPAASAPLGKGGKGRVTELEH<br/> ELHEYQYNMGLLLLEKKEWAEEKLEEISQRLKQKEEILKREQAHLNAISE<br/> YERREESMRKALGVEKQCVIDLEKALREIRAEIAEVKFTSEKKITDAQSLE<br/> ASLEEKSLIEGKLHAADAKLAEANRKAQVDRDLEEVEARQRRLEKEK<br/> LYFETERKAREKQLKEQEEQLQEWKLLKESQNRVLQLRSINDREERA<br/> NKNDQLFKIKHDELEEARKSVEATKLTLLKAKENDINKKLNELHSKEKDA<br/> DSKRKELEEREKLIEREKASIREKEGLQKLEDHQVELKSKRRDFELELE<br/> SERKSFDEKMTQKQADLVKREKDVKSLESKLSKTEQALNDKKKTVEGW<br/> QNDLDAKSKALKRWEESLKNDEKRLLEEKQHMDQEQQVEVSKSELE<br/> RIKSRLEAEKERILEAQNNLKLTEEERQEHSVLTERLKEIEEYMRNNSL<br/> SEEIEDLRKQRQKFEFEWEQLDEKRAHLAEEDKVKKIERMNLERWRDS<br/> EEKRLNDAKFEMEEKYKEQLENLERKERVLNDDIKHKQMEDELKGE<br/> RADLQRQLQLHRHELEMEMEQKQASKEKELEDKANELNKKRDFVDN<br/> QLRHAIELNESKIQKIIEKLLAERKILLEERQKLETDAQIDIKRDIDSLH<br/> GLSQSLKVRREAYNRDMKNLIDLFKEYKVCNCGITLFEGLDSLALKDSA<br/> EIEHPSLAVERDHRSLNADTSAPDTGTLVNSGGRLSLLQKCSRLFKFSPI<br/> KKGEQPTENIPFGARLEEASQSDGDYEPTPVYIEAHDSFGAEDDLPSSE<br/> GARDNDESERHDPADDVQMESSVGVADNSIDILGAQSFQDGTNDKAV<br/> DATIASTDQNGKDPAAPEADLQPETSKQGRRQQRNRKGRGKGGVKR<br/> TRSVRAVEDAKAILGETFEEKNDGQGPVAAVGGTRKRRFAGATISE<br/> QDEEGSEAHSESVSLGGQRRRRRTAGAVTETPGEKRYNLRSTVAN<br/> ATAATAQTDKKAAKTGSKHMQATADDTEGTSKADEEPAPESKRAS<br/> ESADYGASQLHEFSQAEIGDAHAPAEGTGEEDGDVVDGKDALPDVP<br/> MTPSGSELGAEQDDEDDDDSERRNQSSISKKLWSFFTT</p> |
| Svi2 | Setaria viridis | Phytozome<br>12<br>Sevir.5G3351<br>00.1 | <p>MASPRSAGAGGGVAGDEAIWRKLREAGFDEDVRRRDKAALIGYISR<br/> LESEIYDYQHNGLILLEQKEVTSKYEQLKAASEATEIMLKRERAAQQSA<br/> LAETRKREENLKKNLCIQKECVSNLEKALHDMRGETAEIKVSYEAKLVEA<br/> LQMIDAAQKKFDEAEKLLAAKSLEAESIRTHNASLRSQDIEDREDQL<br/> RRDRTSFELESASKEKEISLQRKLLDDTKKILHEKEQALVKEQALLNQRD<br/> DNILERLGYITHSEKRLEEEKLNLEDERKALMEEKNKLDLKMQAISREEA<br/> IHKESVLDKRESELLVLQETIASKERAIEIRLHQEQEIDLGRRRNEFDTE<br/> MEIKLTSFKEEIEARKTLLDQRESALSEQEDAVAQREQNINLRLAELSNK<br/> EESLVKRSDELKEERKLSSHRDTHVSELQKEREIQQNMKLDLEKEKSF<br/> EEEKREAIQAQEKLLITQSEREDLLILQMKLKEEIDSLRAQKVELMVD<br/> AE RLLAEKERFEIEWELIDEKKDELQKEAARIAEERRVIDEHLKNELDVIKQE<br/> KENLRIQFKSSAESLACEHKEFMNKMQQEHASWLSRIQQEREDLKRDI<br/> DIQRTELMNSAKARQMEIESYLREKEEEFEQKKSKELEYINSEKETISSKL<br/> EHVRIELQKLEDERKEALLERARREQELSEIKSTIDALNEQREKLQEQRKL<br/> LHSDREAITQQIQQLNLEELKIESENQLSLRQCGRSKHGDVETQKEN<br/> GVHLTPDEDQNASPKKCSSPKVILGKKLEVSPSVSTPISWVRKCAQVIFK<br/> RSPEKSADHDNDRSAHATLGNVNDVSLVENGGLFACQLENGAGEVPH<br/> AVDGLKVGKRLNYALSHDQSENLEPKRKHQRSSILTRKVVGGEIDSN</p>                                                                                                                                                                                                                                                                                                |

|      |                          |                                     |                                                                                                                                                                                                                                                                                                                                                                                                                                                                                                                                                                                                                                                                                                                                                                                                                                                                                                                                                                                                                                                                                                  |
|------|--------------------------|-------------------------------------|--------------------------------------------------------------------------------------------------------------------------------------------------------------------------------------------------------------------------------------------------------------------------------------------------------------------------------------------------------------------------------------------------------------------------------------------------------------------------------------------------------------------------------------------------------------------------------------------------------------------------------------------------------------------------------------------------------------------------------------------------------------------------------------------------------------------------------------------------------------------------------------------------------------------------------------------------------------------------------------------------------------------------------------------------------------------------------------------------|
|      |                          |                                     | GSPSVLEEKCSKNEHDAVLVGLSRKGLPYPRTEGEVASSDDALFVNGKP<br>DTSDIPDDEPSEEISVSAAEALNGDVAEDKDELEDSDDEGEEEEEEKA<br>SSAKKLWRFLIT                                                                                                                                                                                                                                                                                                                                                                                                                                                                                                                                                                                                                                                                                                                                                                                                                                                                                                                                                                            |
| Swa  | Selaginella_wall<br>acei | onekp:JKAA_<br>scaffold_201<br>2323 | ARRRTEIWESFREAGALDEASLEMKDRTALISHISKLENDLYQYQYQM<br>GLLLLLESKNQGSECERLNVLEETRDALKREQAAQMVAISEAEKREEYL<br>KKAATERKCVADLEKALREMQIEIAEAKAASEREVQRAKEAAQLAE<br>KRLEAESRLCSGEALHAEARNKVAEASRKLAEADSREDDLRRERHHFNL<br>DCEARKAEFESERKSLKNLENKLELEERLARSEKLSQREEHVQRDEA<br>LANLEKYLDEAKEAMEKDRASIHQSEALNAQMAAFSLREQAALEREN<br>AALKKEQELLLLQEKVDNRDRAFAQHEQHVREVEAENAKETERLNALE<br>ASLRSRD                                                                                                                                                                                                                                                                                                                                                                                                                                                                                                                                                                                                                                                                                                                |
| Tba1 | TBA00021990              | GymnoPlaza                          | MLTPKRRGGWPGWSPTSRSSPAADDKTVVVAEKGGHVTAGSGGGG<br>SSGGAGKAALDAPPRNSLDGNGRILAAAPEEPEIWRQRFRESGSLDHE<br>SLEKKDRAALLAHVKNLEAELYDYQYNMGLLLIERKEWTSKYEQMKHC<br>LAEVEENLKREQSAHLVAITEAEKREESLKKSLGVEKQCVYDIELALHEM<br>RSEVAEFKFTSENKLAQAREIVASTEELKALQAESKLHAAEAMQAEASRK<br>HAETERKLQEIAIESALRRDRQSFKSEREAEVELSLEKQNLDDWEKLL<br>RDGQDRLLLEGQRLNQRDEALQFEKELNVRKQIDNDHA<br>TLKEKEADISVRLAALSTREENAVKREILLDKKEQELLVLQEKLVNKENE<br>IQKLLDEHKAILEERKNEFEAELEQKRSVEEELEKRRNTLELIGADINRK<br>EEKISKREQQMEKKAELKEKEKEVDARMKTLKEREKTYKNEEKEIGIEK<br>KKLEKEREINNEKQELQSMKISLEEEKQHIVNEQENLKVTKERNELT<br>LQTQLKEEIESYRARKQEVEKEAEELRLEKEKFEKEWFLDEKREQVNKE<br>LTQVEEDKKRISKWLRDEDERLKQEKALREQIQSETFAIRLEKEAFEAS<br>MQHERAEWLESIRREQADLVRDSELHRSDLENNIEKRQEEIEKLLREKEI<br>AFQKEREREMQHISAERELASKEMEDMRLERHKLKERERKEIGTSREHA<br>ERQWAEIKKDIEELQLQREKLKEQRESLCKEREALRLFEQLHKLKSEVN<br>VTEDGLDLIGNKAQSHVRTGDTYGFSQEALTQNIQFTPAASAKVDLE<br>PSSGRTPSASGTRNRLSWLQRCASKLFNQSPSPEKIVDATGRKEETDR<br>SQTMPVETGGVESERVXXXLEKLL                                                                                                 |
| Tba2 | TBA00016809              | GymnoPlaza                          | MLSPQQKRWLSSPVSPSKDGKKGNKGGSAIVAFSPSNGRGSMPMNESE<br>IWRRLKAAGLDEETLQKKDKAALIAYITKLESELYDYQYNMGLILLERKE<br>WMSKSEQLKLAEEAEAGNFKRDKAARLATIAEAEKLEESLRKALGIEKQ<br>CVADLEKALHEMRAESAEIKFVSENKLAKARELVAATEEKSLAAESKLYA<br>GEALQAEASRKHADAERLVQDVEAREDELRRQRQAFKSQCEAHEKEL<br>FFERQNLQEWDNLQEGQERLLEGQRLNQRREEYVIERNEATKQIEKE<br>LQDVKRNVKEQTTLKEKEADLRGLADLPREEALVKREIINKKEQELL<br>VLQEKLASREREIQRLTDEHQAVLEVRKSAFEAELEQQRRRAVDDELEN<br>NRNAADIRELEIKCTEEKINKREKLVEKKAELKEKEKDLGRSKTLKERE<br>KLCKIEEKQIETQQKLEMEREINNLKQVLENTKAALEEERQQIHKEQE<br>RLELTEKERDELRIIQTKLKEEIDNFRAKEQELSKKDEVLNVEKEKFEREW<br>EILDEKTEQLRKELEQVDDEKVVSKWLKDEEQRLKQERRMLREQIKN<br>EETLRLKEEAFANSKKQEEAELLARFQREQADLFRDIELRTIELENSFEQ<br>RREELERNHQRERAFRKEKQKEMHHINAQKELSDKEFIEVKLERQKV<br>DRQKQEIATTREQIDREWSEMKTIDIEQLEIQREKLKEQRESLHKERKEF<br>EAELDQLKLLKVELKMTEDSLKLSEQQLSQVNLNDYEVISPGQFDGGIS<br>QEALRQNISAMPFNADGLCSEILPGGAPASASDTPSPPLAWLQKCASRIF<br>KKSPGSRVESNIHEQEIEIAANLVSEGTGPGVGDIPALSGLKQYSMPVAN<br>LFESQPSFPAINRHGRNDKGSRLRVFKRARAVRAVVEEVKGSIEDMSER<br>DKNESDNGNECQQNTVVNSVDDDDAMLNREKEVCDSAVSAQXXXX<br>XSEH |

|      |                 |                                      |                                                                                                                                                                                                                                                                                                                                                                                                                                                                                                                                                                                                                                                                                                                                                                                                                                                                                                                                                                                                                                                                                                                                                                                                                                                                                                                |
|------|-----------------|--------------------------------------|----------------------------------------------------------------------------------------------------------------------------------------------------------------------------------------------------------------------------------------------------------------------------------------------------------------------------------------------------------------------------------------------------------------------------------------------------------------------------------------------------------------------------------------------------------------------------------------------------------------------------------------------------------------------------------------------------------------------------------------------------------------------------------------------------------------------------------------------------------------------------------------------------------------------------------------------------------------------------------------------------------------------------------------------------------------------------------------------------------------------------------------------------------------------------------------------------------------------------------------------------------------------------------------------------------------|
| Tca1 | Theobroma cacao | Phytozome 12<br>Thecc1EG01<br>9537t1 | MFTPQRKVVSGWSLTPGKKVDGSGSDPNSNGVAVGKKGAAAFVEP<br>VTPNGNGLGSEDHEGVPEKVLRLLENELFDYQYNMGLLLIEKKEWTSKY<br>EELSQUALIEAKDALKREQAHLIAADVEKREENLRKALGVEKQCVLDLE<br>KALRDMRSENAEIKFTADSKLSEANALIASVEEKSLEVEAKLRAADAKLA<br>EVSARKNSEIARKSQEVESRENALRRERLSFISEQEANETTLSKQREDLRE<br>WEKKLQDTEERLAKSQRYVNVQREERANENDRLFKLKEKDLEETQKKID<br>AANQTLKEKEEDINSRLAHLTLKVKEWDAVREKLEMKEKELLIIEEKLNA<br>REKVEIQKLLDEHNAILDGRKHEFELEIAEKRSKSLDADLKSIVIEVEKKEA<br>EVKHLEEKVSKREQALDKKLEKFEKEKEFELQVKNHKEREKAIKSEGKN<br>LEIEKKQMLADKEDLLSLKAEVEKIRVENEKLLKMHEENDRLRVTEER<br>SEYLRQLQLELKEEIEKCRLESEELLKEVEDLKRQKENFEREWEELDEKRL<br>EIKELKNISQQTEKFEKQKLAEEERLKNKQVAEDYIKRELDALVAKETF<br>AATMEHEQSVIAEKAESERSQRLHDLELQKRKLESDMQNRFEEMEKEL<br>GESKSFEEKERELDKINHLREVARRELEELKQERLKEEKEQEVNASK<br>MHLEGGQIEIRKDIDDLVDISKKLDQREHFIKERNRIFISVEKHKCKN<br>CGEMTSEFMLS DLQSLQKIEDEEVLPLPSLADDYISGNAFRNLAVSKRQ<br>KDEISPPVSGSGSPVSGGTMSWLRKCTSKIFKLSPGKNIEPHAVTKLNVE<br>APLSGGQVNMEGMSNVEHEPELSIAAATESLDVHRVQSDTSTRDVDA<br>GQDLSIDNQSNIKSKELEVLGDSQNSDFNRGNQLRKRGRPRVKRTRSV<br>KAVVKDAEAIIGKALESNELEHPNGNLDSGHANAESRDESGLFDGGTS<br>RNARKRNRAQTSQKTESEQDGVDSGHSIVAGQQRRRQKVVLM<br>PTPGEARYNLRRPKTGVTVAKTSDVNRENEGAKDAGDQVNYSKAP<br>MPVSENGDASENGGSAHFLLQCCETARDTNDGDADATKLAADAALS<br>EEVNTAPEGVGEYGDGNDYRSDSRSEGLKDEDEDEDEEHPGEVSM<br>GKLLWNFFTT |
| Tca2 | Theobroma cacao | Phytozome 12<br>Thecc1EG00<br>0864t1 | MASPVTPGTSRALSITPGSRVLKSPLSDETIWKRLKEAGFDEESIKKRD<br>AALIAYIAKLETFLDQHHMGLLILERKELASKYDQIKSSAEATEIMHKR<br>DQAAHISALAEAKKREDGLKALGVEKECITSIEKALHEMRAESAETKV<br>AAESRLAEARIMIEDAQKQKVVAAEAKFNAAKSLQAEVSLFQRTAERKLQ<br>EVEAREDDLGRHILLFKKCDAKEKEIVQERQSLSERQKIVQQEHERLLD<br>GQASLNQREEYIFSRQELNLLKELEASRADIEKERRALKDEKSNLELSL<br>ASLSKREEAVIEREALLSKKEEQLLVSEQKLANKESVEIRKAIASHETVLR<br>RKSEFEAELEIKRKMTEDEIEMKRRTWELKEMDINYREDQIREREHDFE<br>IRSRMLAEKEKDVAEKSNLIDEREKNVSVLDRELELKKALLEKEKEEITKM<br>KLELQKSLSSLEDKRNQVDCAKEKLEAMRSETRELSTLELKLKEELDVR<br>VQKLELMADADRLKVEKAKFENEWELIDEKREELRKEAARVRDEREAV<br>LKFLKDERDSLRRERDVMREQHKKDVESLNREREDFMNKMVLEHSD<br>WFNKIQQERGEFLLGIETQKRELENCIEKRREELEGLSKEREETFERERK<br>NELQHINALKERVEKELEQATLEMKRLDAERMEIKLDREQREREWAE<br>NKSIEELKVQRHKLKQQRELLHADRKEIHAEIEELKKGDLKAALDNMM<br>VAQMQQSIIELSQQKASERKNLQQTLMQNAAGSDSDKNM VVADNG<br>NGFNPMKPTGASPPSSARFSWIKRCELIKFHNPDKAQMKPEEGSLI<br>SDTENVCLTSAGKLVSSDGQYKRYGRKPVGFDREP K VIVEVPCEGEV<br>KGIHDLESEIEKNDAEKSVLVEQDNQAGKRRVANSRSGTKRRRQK<br>KASLIEEEDITNSINSTEPNASQDQPALTDNRHGGADETNGLIIDKII<br>NISEVTYEKKSVGDDDIVAESVQDISQSGVMCSHANATQKNGGSEE<br>PGMVQEAHLGDLSQVIEPCQPMEDISERSEQLEANVAPKPDNEKI<br>GMRTRSMQKL                                                                                                           |
| Tca3 | Theobroma cacao | Phytozome 12<br>Thecc1EG01           | MFTPQRKAWPGLPLTPSTEPQRAGVSNTRSGGIGGKGAFAFFDDTR<br>KLPPPPVGSLSGRGPLNVGLEEEGMEDWRRFKEAGFLDEAALERRDH<br>EALVERLSKLERELFDYQYNMGLLLIEKKEWTSKCELTQELAEAEIILRR                                                                                                                                                                                                                                                                                                                                                                                                                                                                                                                                                                                                                                                                                                                                                                                                                                                                                                                                                                                                                                                                                                                                                        |

|      |                       |                                     |                                                                                                                                                                                                                                                                                                                                                                                                                                                                                                                                                                                                                                                                                                                                                                                                                                                                                                                                                                                                                                                                                                                                                                                                                                                                                                                                                                                                 |
|------|-----------------------|-------------------------------------|-------------------------------------------------------------------------------------------------------------------------------------------------------------------------------------------------------------------------------------------------------------------------------------------------------------------------------------------------------------------------------------------------------------------------------------------------------------------------------------------------------------------------------------------------------------------------------------------------------------------------------------------------------------------------------------------------------------------------------------------------------------------------------------------------------------------------------------------------------------------------------------------------------------------------------------------------------------------------------------------------------------------------------------------------------------------------------------------------------------------------------------------------------------------------------------------------------------------------------------------------------------------------------------------------------------------------------------------------------------------------------------------------|
|      |                       | 1885t1                              | <p>EQAAHLIAYSEVQKREENLAKALDVEKQCVDLEKTLRDIQEEHAQVKL<br/> SSDTKLANASALVAGIEGKSLEVEEKMHAADATLAEVNRKSSELEMKL<br/> QEMEARESLLQRERLSLIAEREAHQATFYKQREDLNGWERKLNKGEER<br/> LSELRRTLNQREEKANENDRLLKQKERSFEVQNKIDLSTLKLKEMEDD<br/> VSKRFTDLVSKEKEAESMRSILQAKEKDLVALEEMLTARERVEIQKLVNE<br/> QRVILDAKMQEFELELEEKRSVNEELESKVNEVNQQEAEHLHHEEKL<br/> KQEQALDKKLERVKEREKDLVRLKTVKDRDKFVKTEEKLELEKQQLY<br/> SAKESLQALKDEIDKIGAETSQQELRIREESQKLIKITEEERSEHIRLQSELK<br/> QQIDSCRHQEELLLKEHEDLKQQRENFEKEWEVLDEKRAEITMQRKEI<br/> VEEKDKFEKFRHSEERLKKESAMRDYVCREMESIRLQKESFEASMKH<br/> EKSVLLEEAQNEHIKMLQDFELQKMNLETDLQNRFDQKQKDLQERIV<br/> AFEEVKERELANMRCSKEDVEREMEEIRSARLAVEREKQEVAINRDKL<br/> NEQQQEMRKDIDELGILSSRLKDQREHFIRERHSFLEFVEKLKCKTCGE<br/> ITRDFVLSNFQLPDVEDREIVPLPRLADELIRNHQGYLGASGVKNIKRSP<br/> EAYSQYPESAGRMSWLKCTTKIFSISPTKRNESKAEGPGELTNKEAGG<br/> NIHEKAGEPSLRIPGDSINNQLLQSDKIGKVDDRSRPSLDHSTYDSKVQ<br/> EVPEDSQSERKSGRRKPKRPKSGLNRTRSVKAVVEDAKLFLGESPEE<br/> PEPSESVQPDDISHANEVSAGVSTHSENRRARNRARRRRPQDSKITDT<br/> ELDAADSEGRSDSVTTGGQRKRQQTAAQGLQTPGEKRYNLRPKLTV<br/> TAKAALASSDLLKTRQEPDGGVVEGGVSDTENRSSNLVQVTTLKNVEI<br/> VEEKVVRFKTSVDVDDNANAAPVGSVDLSEEVGTAENGNEDQSVSSI<br/> DEDEDDSDDEIEHPGEVSIGKKIWTFFTS</p>                                                                                                                                                                           |
| Tdi1 | Taxodium_<br>disticum | onekp:FHST_<br>scaffold_206<br>5748 | <p>PPRNSLDGNGRFVSTAAVAEPEVWRRFKESGLDHESELEKDRALL<br/> LHINKLDAELYDYQYNMGLLLIERKEWTSKYEQMKLALAEAEESLKREQ<br/> SAHLVAITEAEKREESLKKSLGVEKQCVDLEKALHEMRSEVAEIKFVSE<br/> SKLAQAREMVASTEENLEAESRLHAAEALQAEASRKHAEETERKLOEIE<br/> AIESALRRDRQSFKSERDAHEVGLSLERQNLDDWEKKLQDGGDRLLEG<br/> QRLLNQREEYTNQRDEALKQIEKELEDACKQIENDHTTLKEKEADISIRL<br/> TALSTREENAVKRENLIKKEQELLVLQEKLASKENEEIQKLLDEHKAML<br/> EARKIEFAELEQKKISVEEELKRRSTLELFEADINSKEEKISKREQQIEKK<br/> TEKLKEKEKEVDARSKALKEREKILKSEEKEIMIEKKQLDGERGEINNEKQ<br/> ELQNLKVSMEEEKQQIFSEQEKLKVTEKERNELQKLQTELKEEENYRA<br/> QKQIEKEAEELRLEKEKFEKEWEFLDEKRDQAKKELTMVEEKKRISK<br/> WLRDEEERLKQEKALQERIQNETEALHLEKEAFAAIMQHERAELLES<br/> RREQADLLRDGELHRSDLENNIGKRQEEIEKFLQEKEIGFQKEKDRETQ<br/> NISAQRELVSKEMEEMRLERNKLEKERQEISKSQHAEMQRIEIKKDIV<br/> ELQLQRDKLKEQRESLSKEREVSRLVEQLDKLKAELNMSDGLDLIAD<br/> KGGNRRRTGDFNSFSQEGFPQKIFGTPASASAKGDPEPSSGRMVRSAS<br/> GTPSRLSWLQRCATRRFFNQSPSPEKMGIDGSRQKEETDRSPTVVPETTG<br/> AESERMTGEIVVGLIEIQPTFSADDQNHGGVETEVDQAQNGTTKSSP<br/> AVKFDHSLPSRSKNGSKSNDKSKVKVFKRTRSMKAVVEDARGIIDLPS<br/> DQEKNESESQEHLLQNSAVPDNRQDKEGRPGGDQNTSAQEVDDSD<br/> NRESLANDKRSSKSGRRRRGYSSRVTSEQDADDSEIQSELSAGGRRKR<br/> RQKGTANGGSSGLGTPGGKRYNFRHSTIASSVATQALSMDGKDRVVA<br/> QPEEEEPKNLQGTSSGKDTKDSQQDSDLKTAMVPSAQSDNIPQGET<br/> QDSPGCPDGGLEDAVEDLQDVLSHELTKSETGDYDETEGDDGGNEE<br/> DAPVDEIEDEEIDELDEDGDDEEDNDSSLLKKKIWKFLTS</p> |
| Tdi2 | Taxodium_<br>disticum | onekp:FHST_<br>scaffold_206<br>5741 | <p>SPVNEENEMWRRLLKVVGLDEETLQKKDKAALIAHITKLETEIYDYQYNM<br/> GLILLERKELISKYEQLKLTAGEAEGNFKRDQAAQLAAIAEAEKREESLRK<br/> ALGIEKQCVDLEKALHEMRSAEAEIKFVSETKLAKAHELMASTEESLST<br/> AESRLHAGEALQAEANRKRADAERLLQDVEAREDELRRQRQSFKSECE</p>                                                                                                                                                                                                                                                                                                                                                                                                                                                                                                                                                                                                                                                                                                                                                                                                                                                                                                                                                                                                                                                                                                                                                                 |

|      |                    |                                     |                                                                                                                                                                                                                                                                                                                                                                                                                                                                                                                                                                                                                                                                                                                                                                                                                                                                                                                                                                                                                                                                                                                                                                                                                                                                                                                                                                                                   |
|------|--------------------|-------------------------------------|---------------------------------------------------------------------------------------------------------------------------------------------------------------------------------------------------------------------------------------------------------------------------------------------------------------------------------------------------------------------------------------------------------------------------------------------------------------------------------------------------------------------------------------------------------------------------------------------------------------------------------------------------------------------------------------------------------------------------------------------------------------------------------------------------------------------------------------------------------------------------------------------------------------------------------------------------------------------------------------------------------------------------------------------------------------------------------------------------------------------------------------------------------------------------------------------------------------------------------------------------------------------------------------------------------------------------------------------------------------------------------------------------|
|      |                    |                                     | AHEKELFFERQNLREWEKNLQEGQERLLDQGRLLNQREEYVIERNEAT<br>KQIEKELQDLKRNIEKEQSTLKEKEADLRGRLADLTTCQEALVKQEVIIIN<br>KKEQELLLLQEKLATREREEIQRLTDEHQAALEEGKSVFEEEMKQQRKA<br>VDDELENKRNAADVREFEIQCREEKISKREQQVEKKAELKQKDKELDA<br>RLRDVKEREKSCMKMEKEIETLLKKLEIERDEMNIKQVLEKSKAALEEEER<br>QQIRKEQERLELTEKERDDLRIIQIKLKEEIDNFREQEQLSKKDEVLKVE<br>KEKFEREWEILDEKTEQLRKELEKVDDEKRVSKWLKNEEERLKQERR<br>MLREQIKNEEEALRLEKENFANSKMQEEAELLANFQERERADLYRDIELQ<br>KSELEKSIEQRQEELERNYQVRELVFRKEKQKEMQFINAQKELSDKESQ<br>QIKLERQRDREKQEIVRTREHIDRECSEMKKDIEEMEIRREKLKELRESL<br>HKEREEFAQLDQLKKLDELKMTEDSLKLEQPPSQAIVNDYEVISPG<br>HFDGGISQVACRQSISGMPFNADGFCSETHLPRSTASASDTPSPLAWL<br>QKCTSRIFKSP                                                                                                                                                                                                                                                                                                                                                                                                                                                                                                                                                                                                                                                                                                                            |
| The1 | Tsuga_heterophylla | onekp:GAM<br>H_scaffold_2<br>009581 | MLTPKRRGWPGWSPKTPSPPPPPPAEEMAGSSHVATPAAAAGSS<br>GGRALVEAPPRNLLDNNGEIVASRGQPEIWRRFREAGSLDEESLEKKD<br>RAALVVHVTKLEAELYDYQYNMGLLIERKEWTSKYEQMKVAIAEAE<br>NLKREQSAHLIAISEAEKREESLKKALGVEKQCVIDLENALHEMRAEMA<br>ELKFTSEDKLLQAREIASSTEEKALAAESKLHAAEALQAEVSRKHAEME<br>RKGQDIEALERALQRERQSFMSEHEACESDLSLERNLLAWEKKLQEG<br>QERLIEGQRLLNQREEYINKRDEAMKQIEKELEDAKMQIEKDHATLKEK<br>EADISARMTALATREEDVVKGETVINKKEELHALQEKLVIEMENEEIQKL<br>IDDHKATLEARKIEFEAEIEQKKILVEEELGKKRSDIELMEDNVNRKEEKI<br>SKREQQLEKKAEKVKEKEKEVDARSKALKEREKTYKNEEKQIEMEKKL<br>EAERGDINNEKQELQNLQVVLKEEKQQILNAQENLKVTEKERTELLKQ<br>TELKEEIEDYRARKQQVENEAEELKLEREFKEWEILDEKREQVRKESA<br>QVDEDRKRISKWVLDEEERLKQEKRALREHLQSDSDSLHLEKEAFKNT<br>MEHERAEWFENRRERADLLRDIELQRSELESSIEKREEEIERLLHEKEA<br>EFQKEKEREMQHIFEQREIARKEMEEMRVERRLEKERQENTKSREHA<br>EKEWSEIKKDIHELQVQREKLKEQRESLCKEREVLSLFEQLKKLKTENV<br>TEDHMKQIADKDGSHFLRPEDAFAFSQQPGQNFIFGTPVDTSVKFNP<br>EPSSGRTDASTSKTSRLSWLQRCASKIFNQSPSPGKVDSTVWKEETER<br>SHTPALEVDLGAEIERMTYENTVGANIEHTSSADVQNDGCIVEAAEDN<br>RQGHGKLSKSVVNFSSLPSPSVGNHKSCKAKVRVFRTRSMKA<br>VVEEAKGILDTLSDMEKNESEDRQEQEQNDTAVTANSEDPGKEADTD<br>KTDTAKEIDESKGESLASDKKPSQSGKKRRRKYSSRATSAQDAEAEIQ<br>SELTSQRRKKRQRDSANGDNSVVGAPGGKRYNFRSTIASTIAAQT<br>SLEEKEKDLTTQEEEDSRRVQENPPERVAEDNQEASSDEPARVPSIGE<br>RDMKTTPAEDQRPQSFQENGLGDAGDDLQEVSSHGLTKSETGEFYAE<br>SEDEGGNGQDIEEIVETEEDVEEAEFEDEENNDGDDQKASLRKKLW<br>NFLTT |
| The2 | Tsuga_heterophylla | onekp:GAM<br>H_scaffold_2<br>011463 | TPVNESEMWRRLREVGLDEETLQKKDKAFLVAYITKLESELYDYQCNM<br>GLLIERKEWTSKYEQMTLATSEAEDKAKRDRAAHSVAIAEDEKQEE<br>KKALGVEKQCVDLEKALHEMRAQCAELKFISDNKLAQAREMVAITEE<br>KSLAAESKLHAGEALQAEANRKQADAERKLQVEAREDALRRERRVFK<br>SECESHEKELILERQNLRGWDKLLQEGQERLLEGQKFLNQREAYTLERD<br>EALKHIEKELQDLKMNVEKEHSTLKEKEAGLRASLAALMTREEAVVKQE<br>ITVDKKEQELLVLQEKLASREREEIQRLTDEHKATLEAIRIEFEAELEQKRK<br>IVEDELENKENATDLRGLAISRKEEKLSKREHYLEKKAELKEKENELDAR<br>SKTLKEREKTYKTEEKEMQNEKKLEVERKEINNTKQELEKFKASLEEEER<br>CHIVKEQQKLELTKNERDELDDLQTKLKEEIDDLRAQKQELLKEADELNV<br>EKEKFEREWEILDEKREQLRKELEWVDDERKKVPKWVKDEEERLKQEK                                                                                                                                                                                                                                                                                                                                                                                                                                                                                                                                                                                                                                                                                                                                                                                                  |

|      |                   |                             |                                                                                                                                                                                                                                                                                                                                                                                                                                                                                                                                                                                                                                                                                                                                                                                                                                                                                                                                                                                                                                                                                                                                                                                                                                                                                                                          |
|------|-------------------|-----------------------------|--------------------------------------------------------------------------------------------------------------------------------------------------------------------------------------------------------------------------------------------------------------------------------------------------------------------------------------------------------------------------------------------------------------------------------------------------------------------------------------------------------------------------------------------------------------------------------------------------------------------------------------------------------------------------------------------------------------------------------------------------------------------------------------------------------------------------------------------------------------------------------------------------------------------------------------------------------------------------------------------------------------------------------------------------------------------------------------------------------------------------------------------------------------------------------------------------------------------------------------------------------------------------------------------------------------------------|
|      |                   |                             | IVLREEIKRDAEGLRLEKEAFENSMQHQRAVLFAEVQRERADLLRDIEL<br>QSNELDNSIERRREELEKHYQDKELSFQKEKEKEIQYISAQRELLRKEIEEI<br>KSERQRFERERKEIATNQHQTEKEWSEMKKDIEELQIQREKLKEQRQSL<br>HKERQELQAQLVELNRIKDELKMTTEESLKVSEQQLSQVNINDCEVISPG<br>HGISQVALRENILAVPQNATIEFNISGSPERTSASASTPSPLAWLQKCAS<br>RLFKQSPEK                                                                                                                                                                                                                                                                                                                                                                                                                                                                                                                                                                                                                                                                                                                                                                                                                                                                                                                                                                                                                                  |
| Tnu1 | Torreya_nucifera  | onekp:HQM_scaffold_2018373  | PPRNSLDGNGRIPATAVAEPEIWRRFREAGSLDHESLEIKDRAALVVH<br>INKLEAELYDYQYNMGLLLIERKEWTSKYEQMKLALAEVEENLKREQSA<br>HLVAISEAERREESLKKSLGVEKQCVDYDIEKALHEMRSEVAELKFTSDNK<br>LAQAHEMVASTEELKALAAESKLHAAEALQAEASRKAETERKLQEIEAI<br>ENAFRRDRQSFKSERDAHEVELSHERKNLLDWEKRLQDGGDRLLLEGQ<br>RLLNQREDYTNQRDEALKQIEKELEDARKQIENDHATLKEKEADISVRL<br>ATLSTREENAFQREIVDKKEQEQLLLQEKLSNKENEIQLLDEHKAML<br>DARKNEFEDELEQKKISVEEELKRRSTVELIEADINRKEEKINKREQQM<br>EKKAELKEKEKEVDARSKTLKEREKTYKNEEKEIEMEKKLEREREIINN<br>EKQELQGVKISLEEEKQQIVNEQENLKVTEKERNELLLQTQLKEEIEINY<br>RARKQEVKEAEELRLEKEKFEKEWEFLDEKREQVSKDLAQAEDEKKRI<br>LKWLRDEEERLKQEKALRERIQSETELLSLEKAFEASMQHERAEWLE<br>NIRREQADLVRDSELHRSDLENNIEKRQEEIEKLLQEKIEGFQKEKEREM<br>QRINAQRELACKEIEEMRLERHKLEKEKQEICTSREHAERQWAEIKKDI<br>DELQLQREKLKEQRESLHKEREVLRLEFQLHKLKTELNFTEDGLDLIAN<br>KGRSNVRTGDVYGISQEALTQNFITPAAASAKFDPGPSSGRSFPALG<br>TPSRLSWLQRCASKLFNKSPSPEKMDATGQKEETDRSHTILKLLVQKV<br>KETGEIVVGLIEPASFADAHDAVEMVKADQEQDINKSTHDLPSPSR<br>GNGRKSNDSKIKVFKRTRSMKAVVEDARGILDNPSPDKEKNESDDKQE<br>HQQNEAAVPDIREDKGGRADGDKTNSVQEIDESRESLANDKRSSKP<br>GRKRRRGQSSRATSDQDADDSEIQSELAVGGRRRKRQQTANGSS<br>GLGTPGGKRYNFRHSTIASVATQTLSDVKEKGVTLPEDEETKNLRVS<br>SSDKVADDSHEASLDKTARVPSAQDSDNNIPPGEACRPSCPDGLD<br>VGEDLQGVSSHEPTKSETGDIYDESEEDGGGNGEDAFVDEIEDEEIDEL<br>DEDGDDDEEDNSSLKKKIWNFLTS |
| Tnu2 | Torreya_nucifera  | onekp:HQM_scaffold_2007523  | ARELMAVTEEKSLAAESKLHAGEALQAEASRKHADAERLLQDVEARED<br>ELRRQRQAFKSECEAHDKELFFERQNLREWEKNLHEGQERLLEGQRLL<br>NQREEYLIERNEATKQIEKELQDVKRNAEKEQSTLKEEADLRGRLVDL<br>TAREEALVKQEVIIINKKEQELLVMQERLASREREIQLRTNEHQAALEA<br>RKSVEAELEQQRAVDDELENKRNAADIRELEINCREEKINKREQVVE<br>KKAELKEKEKELEARSRSFKEREKLCIDEKKIETQQKLELERDEMNN<br>LKQVLEKSKAALEERQQICKEQERLELTEKERDELRIIQIKLQKQIDNFRE<br>KEQELSKKYEVLNGEKEKFEREWEILDEKTEKLRKELEQVDDEKRVSQ<br>WRKDEEERLKQERRMLREQIKNDEETLRLKKEAFASSKKQEEAELFAF<br>QRERADLYRDIELQTSLENSIEQRREELERNYQERERAFQKEKQKEMH<br>YINAQKELSDKEFIDVKLERQRDRERQEIATTREQIDREWSEMKT<br>DIEQLEIQRNKLKEQRELLHKERKEFEAQLGELKKLKEELKMTEDSLKLEQQ<br>LSQANVNDYEAISPGHFDGGISQAARQSISAMPFNADGFCSEIHPGR<br>APASVSDTPSPLAWLQKCASRIFKSP                                                                                                                                                                                                                                                                                                                                                                                                                                                                                                                                                                                         |
| Tta1 | Torreya_taxifolia | onekp:EFMS_scaffold_2015241 | MLTPKRRGGWPGWSPTSRSPPADDKAVVGAEKMCAGGSSSGAGK<br>AAVEAPRNSLDGNGRIPATAVAEPEIWRRFREAGSLDHESLEIKDRA<br>ALVVHINKLEAELYDYQYNMGLLLIERKEWTSKYEQMKLALAEVEENLK<br>REQSAHLVAISEAERREESLKKSLGVEKQCVDYDIEKALHEMRSEVAELK<br>FTSDNKLAQAHEMVASTEELKALAAESKLHAAEALQAEASRKAETERKL<br>QEIEAIENAFRRDRQSFKSERDAHEVELSHERKNLLDWEKRLQDGGDR                                                                                                                                                                                                                                                                                                                                                                                                                                                                                                                                                                                                                                                                                                                                                                                                                                                                                                                                                                                                      |

|      |                    |                                 |                                                                                                                                                                                                                                                                                                                                                                                                                                                                                                                                                                                                                                                                                                                                                                                                                                                                                                                                                                                                                                                                                                        |
|------|--------------------|---------------------------------|--------------------------------------------------------------------------------------------------------------------------------------------------------------------------------------------------------------------------------------------------------------------------------------------------------------------------------------------------------------------------------------------------------------------------------------------------------------------------------------------------------------------------------------------------------------------------------------------------------------------------------------------------------------------------------------------------------------------------------------------------------------------------------------------------------------------------------------------------------------------------------------------------------------------------------------------------------------------------------------------------------------------------------------------------------------------------------------------------------|
|      |                    |                                 | <p>LLEGQRLLNQREDYTNQRDEALKQIEKELEDARKQIENDHATLKEKEAD<br/> ISVRLATLSTREENAFQREIVIDKKEQELLVLQEKLSNKENEEIQKLLDEH<br/> KAMLDARKNEFEAELEQKKISVEEELEKRRSTVELIEADINRKEEKINKRE<br/> QQMEKKAEKLEKEKEVDARSKTLKEREKTYKNEEKEIEIEKKLERERE<br/> EINNEKQELQGVKISLEEEKQQIVNEQENLKVTEKERNELLKLTQLKEE<br/> IENYRARKQVEVEKEAEELRLEKEKFEKEWFLDEKREQVSKDLAQAEDE<br/> KKRILKWLRDEEERLKQEKALRERIQSETELLSLEKEAFEASMQHERAE<br/> WLENIRREQVDLVRDSELHRSDLENNIEKRQEEIEKLLQEKEIGFQKEKE<br/> REMQRINAQRELACKEIEEMRLERHKLEKEKQEICTSREHAERQWAEIK<br/> KDIDELQLQREKLKEQRESLHKEREEVLRLEQLHLKTELNFTEGLDLI<br/> ANKGRSNVRTGDVYGISQEALTQNIQGTAAASAKFDPGPSSGRSFP<br/> ASGTPSRLSWLQRCASKLFNKSPSPEKMDATGQKEETNRSHTILPETA<br/> GAESERVTEIIVVGLIEPAPFSAHAHAEMVMKADQEQDINKSTHDL<br/> PSPSRGNRKSNDKSKIKVFKRTRSMKAVVEDARGILDNPSDKKNES<br/> DDKQEHQQNEAAVDPIDEDKGGGRADGDKTNSVQEIENRESLAND<br/> KRSSKPRKRRRQSSRATSDQDADDSEIQSELAVGGRRKRRQQGTA<br/> NGGSSGLGTPGGKRYNFRHSTIASSVATQTLSDMVKEKGVTLPEDEET<br/> KNLRVSSDKVADDSHEASLDKTARVPSAQSDNNIPPGEACRPSCP<br/> DDGLEVDGEDLQGVSSHEPTKSETGDIYDESEEDGGGNGEDAFVDEIE<br/> DEEIDELDENGDDDEEDNSSLKKKIWNFLTS</p> |
| Tta2 | Torreyia_taxifolia | onekp:EFMS_scaffold_2013322     | <p>AEVKFVSENKLAKARELMAVTEEKSLAAESKLHAGEALQAEASRKHAD<br/> AERLLQDVEAREDELRRQRQAFKSECEAHDKELFFERQNLREWEKNLH<br/> EGEGQERLLEGQRLLNQREELYIERNEATKQIEKELQDVKRNTEKEQST<br/> LKEKEADLRGRLADLTAREEALVKQEVIIINKKEQELLVLQERLASREEEI<br/> QRLTNEHQAALEARKSVFEAELEQRRRAVDDELENKRNAADIRELEIN<br/> CREEKINKREQVVEKKAEKLEKEKELEARSRSFKEREKCLKIDEKKIETQ<br/> QKKLELERDEMNNLKQVLEKSKAALEEEERQQICKEQERLELTEKERDEL<br/> RIIQIKLKQEIENFREKEQELSKKYEVLNKEKEKFEREWEILDEKTEKLRKE<br/> LEQVDDEKRVSRQWRKDEEERLKQERRMLREQIKNDEETLRLKKEAFA<br/> SSKKQEEAELEFAKQFRERADLYRDIERTSELENSIEQRREELERNYQERE<br/> RAFQKEKQKEMHYINAQKELSDKEFIDVKLERQRLDRERQEIATTREQI<br/> DREWSEMKTIDIEQLEIQRKLLKEQRELLHKERKEFEAQLGELKLLKEELK<br/> MTEDSLKLEQQLSQANVNDYEAISPFGHFDGGISQAQAFRQISAMPFN<br/> ADGFCSEIHPGRAPASVSDNPSPLAWLQQCASRMFKKSP</p>                                                                                                                                                                                                                                                                                                        |
| Vvi1 | Vitis vinifera     | Phytozome 12 GSVIVT0103 1076001 | <p>MELLSEIKKNSVHVRLGFLFHLSLHSASPTLRVVEIVVMFTPQRKVVWS<br/> GWSLTPRSDAQKNAAGSGSNLSPRNGGVDGSGVSKGKSAFVPEVT<br/> PGENGGNMVERPGEVASDLEALVAKVSKLESEIFEYQYNMGLLIEKKE<br/> WTSKYDELRLQALVDVKDALKREQDAHLVAMSEVEKREENLRKALGIEK<br/> QCVLDLKALHEMRSEYAEIKFTSDSKLAEANALVTSIEERSFEVEAKLH<br/> AADAKLAEVSRKSSEIERKSQEVDARENALRRERLSFNAEREAHETTLSK<br/> QREDLREWEKKLQEEEEERLGEGRILNQREERANENDKIFTQKEKDLEE<br/> AQKKNEMTHLTLKKKEDDISGRLSNLTLEKETDAVRQSLEIKEKELLEL<br/> EEKLCARERVEIQKLVEHNIILDAKKREFELEIEQKRKSLEELKSKVVEV<br/> EKKETEFNHMEAKVAKREQALEKKLEKFEKEKEFEKSKALKEKESIR<br/> AEEKNLEAEKKHILADKEDLLSKAVA EKIRVEIEEQKLVHEEREQLEITE<br/> EERVGNIDELVSLSRKLDQRELFSKERERFI AFVEQQKSCNCGEITCEF<br/> VLSDLQPLPEIENMTPGIVGSGSPTSGGTISFLRCKTSKIFNLSPGKKIEV<br/> AAIQNLTEAPEPSRQAIVEPSKRLGSTEDEPEPSFRIANDSFDVQRIQSD<br/> NSIKEVEAGQDLSIDESNIDSKALELQQHSQHSDLKGARRKPGKRSKQR<br/> IHRTRSVKAVVRDAKAILGESLELKSSFADKGTPRNGRKRQRAYTSQTM<br/> VSEQDGDSEGRSDSVMARRQGKRRQKVPVAVQTLGQERYNLRRPK</p>                                                                                                                                  |

|      |                |                                          |                                                                                                                                                                                                                                                                                                                                                                                                                                                                                                                                                                                                                                                                                                                                                                                                                                                                                                                                                                                                                                                                                                                                                                                                                                         |
|------|----------------|------------------------------------------|-----------------------------------------------------------------------------------------------------------------------------------------------------------------------------------------------------------------------------------------------------------------------------------------------------------------------------------------------------------------------------------------------------------------------------------------------------------------------------------------------------------------------------------------------------------------------------------------------------------------------------------------------------------------------------------------------------------------------------------------------------------------------------------------------------------------------------------------------------------------------------------------------------------------------------------------------------------------------------------------------------------------------------------------------------------------------------------------------------------------------------------------------------------------------------------------------------------------------------------------|
|      |                |                                          | TTVTVAAAKSSTNLHKKETETDGSAGGTGEEIPDCNAAPATSVGLIS<br>ENGGSTHVLQLEAAEDTQDDNADVTKELVENMALSEEVNETPDEGP<br>MEYNDEDEEYHPGEVSIGKKLWTFLLT                                                                                                                                                                                                                                                                                                                                                                                                                                                                                                                                                                                                                                                                                                                                                                                                                                                                                                                                                                                                                                                                                                        |
| Vvi2 | Vitis vinifera | Phytozome<br>12<br>GSVIVT0100<br>7428001 | MASPOPARFSIAATPGSRVLQSPLSDDAIWKRLRDAGFDEESIKRRDK<br>AALIAYIAKLEAEIFDHQHMMGLLILERKEWATKYEQIKTEAESAEIVYKR<br>DQSAHSSALAEARKREDSLKKALEIEKECIANLEKALHEMRQECAETKV<br>AAEIKLAEAHSMVEDAQKRFVEAEAKLHAAEFQAEICFRRTAERKL<br>QEVEAREDDLRRRLISFKSDCDEKEKEIILERQSLSERQKNVQQGQERLI<br>DGQALLNQREEYIFSRSQELNRLEKELEASKSNIKELRALNEEKSLELK<br>LASLTTREEDVVKREALLNKEHEILIQEKIASKESDEVQKLMALHEIAL<br>KTRKAEFEAELETKRKLVEDEIEAKRRASELREVDLSNREDFALEREHELE<br>VQSRALAEKEKDVTEKLNLSLDEKEKYLNAEKDVELEKIHLEKEKEEINK<br>MKLNIEKSLSSLEDKKKQVDHAKKVEAMKSETSELLVLEMKLKEEIDVI<br>RAQKLELMAEADELRAQKANFEAEWESIDEKREELRNEAERIAEERLAI<br>SKFLKDERDSLKLEKDAMRDQYKQEVESLSREREDFMSKMMVHERSEW<br>FSKIQQERADFLLDIEMQKKELENCIDNRREELESYFKEREKTFEQEKMK<br>ELQHISSMKERVAKLEHVASEMKRLDAERMEINLDHERRDREWAELS<br>NSIEELKMQRQKLLKQRELLHADRKEIHTQIEHLKLEDLKIASNIALA<br>EMQQSNQEPSQRKVYVKRYKAQNTIPNADFESHQKINVVKNGSGF<br>NLPALPDSSSPSTATPFSWFKRCAELIFKLSPEKPSIKHGEKSSISNSENA<br>NLTLAGNLDLSDGFDREVHNRNEKTHSISDRQPTRYALGEPKVILEVPS<br>SGEDVKGLHTLESEIKKDTSENSSHSEKELLAGRKRVRVNSSNDWV<br>DTTLEQRQKNKRRRQESAADPCGVSIQSDAREGQDVSISLNQTQGG<br>AEETNLLITDEIIKISEVTCENVVFDNQAKPNALQNSVVELGQDIQHGG<br>TNGLADSNANCVLSSDFKAQEKIGKEVLFVDVGVQVIEHSQPQDESISE<br>KSQQELQEQGVPKSDDDKLSEKVGRRMRSRQKS  |
| Vvi3 | Vitis vinifera | Phytozome<br>12<br>GSVIVT0101<br>1972001 | MFTPQRKAWTGLSLTPRSEAQKSGGGAVSNPVGKGGKGSVAFVDGP<br>PPPLGSLSGKAMLTGIDGGDMEDWRRLREAGLLDEAAMERKDREAL<br>VEKVKLQNELFDYQYSMGLLIEKKEWTSKYEELSQAALAEAEIILKREK<br>SAHFIAISEVEKREENLRKALGVERQCVAELEKALGEIHAESQIKLSSET<br>KLSANALVAKIEKRSLEVEEKLLAADAKLAEASRKSSELERKLQVEVARE<br>SVLRRERLSLNAEREAHEATFHKQKEDLREWELKQEGEERLCEGRRII<br>NQREEKANEIDRTLKLNLEEAQKKIDLSLNVKVEDDINNRLAELT<br>VKEKQAESMRGILEVKEKELIVLQEKLSARERVEIQKLLDEHRAILDTKK<br>QEFELMEQKRNVSDEELRSKVHEVEQKEVEVLHREEKLGKREQALEK<br>RLERVKEKEKELEAKLTLKEKEKSLKAEKRVVEGKQMLADKESLHLL<br>KDELEKIRADITEQELQIHEETERLKVTEERSEHRLQLELQKQIDKCRH<br>QEEMLQKQEREDLKQERIMFEKDWEALDEKRAVITKEMREIGDEKEKLE<br>KLHLSEEERLKKELAMEEHIQRELEAVRIEKESFAAIMKHEQLRKRDLI<br>EMQNRQDEIQRLQERERAFEEERERELNNINHLKEVARREIEEMKTE<br>RRRIEKEKQEVLLNKRQLEGHQLEMKIDELGILSRKLDKQREQFIKER<br>DRFLTFVDKHKTCCKNGEITREFVLNDLQLPEMEVEAFPLPNLADEFNL<br>SPQGNMAASDGTNVKISTGEIDLVSSESGSDELEPSFGIANDSFDIQQLHS<br>DSVMREVDGGHAQSVGVSNMGSKEQEGPEDSQQSELKSGRRKPG<br>RKRRTGVHRTRSVKNEGERETSHAEEASTITRKRQRAPSSRITESEQD<br>AADSEGRSDSVTAGGRGRRQTVAPVVQTPGEKRYNLRHKTAGTVA<br>TAQASANLPKRDEKGGDGGDNTLQTKANPKAASSPSLADSDNPKTT<br>PLVHVTTLSVEIREYSPDRVVRFKTVDIVGGNDSARLAENMELRQEI<br>PGNPGDTPGYEDENGSMSSHEEDDNDSEDESEHPGDASIGKKLWNFF<br>TT |
| Zma1 | Zea mays       | Phytozome                                | MFTPQGGKGTGWSTPTPANQRSGGGAPAASAPLGKGGKGRVALEQ                                                                                                                                                                                                                                                                                                                                                                                                                                                                                                                                                                                                                                                                                                                                                                                                                                                                                                                                                                                                                                                                                                                                                                                           |
