# Supplementary material for: Evolutionary history and structure of nuclear matrix constituent proteins, the plant analogues of lamins
Source: PubMed Central journal article supplement — J Exp Bot. 2019 Mar 2;70(10):2651–64. doi: 10.1093/jxb/erz102 (PMC6506774; doi:10.1093/jxb/erz102), 2019-03-02
Supplement: erz102_suppl_supplementary_figures_s1-s3.pdf [file erz102_suppl_supplementary_figures_s1-s3.pdf]

**Supplementary dataset S2.** Expression data of different NMCPs: *Ppa1*, *Ppa2*, *Osa1*, *Osa2*, *Zma1*, *Zma2*, *Bdi1*, *Bdi2*, *Gma1I*, *Gma1II*, *Gma2II* and *Gma3II* from the eFP browser.

## Ppa1

Organism *Physcomitrella patens*  
Transcript Name Pp3c2\_34830V3.1 (primary)  
Alas Pp3c2\_34830J5.1 Pp3c2\_34830 Phpat.002G143000  
Phypa\_129421 Pp1s76\_81V6 Pp3c2\_34830.v3.1

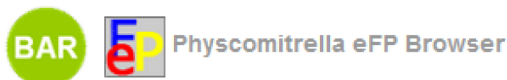

Like 1K

Data Source  Mode  Primary Gene ID Secondary Gene ID Signal Threshold   
Physcomitrella Absolute Pp1s76\_82V6.1 Pp1s9\_9V6.1 1869.76 Go

• For group1 data, this probe set reaches its maximum expression level (expression potential) of 1869.76 in the Physcomitrella data source.

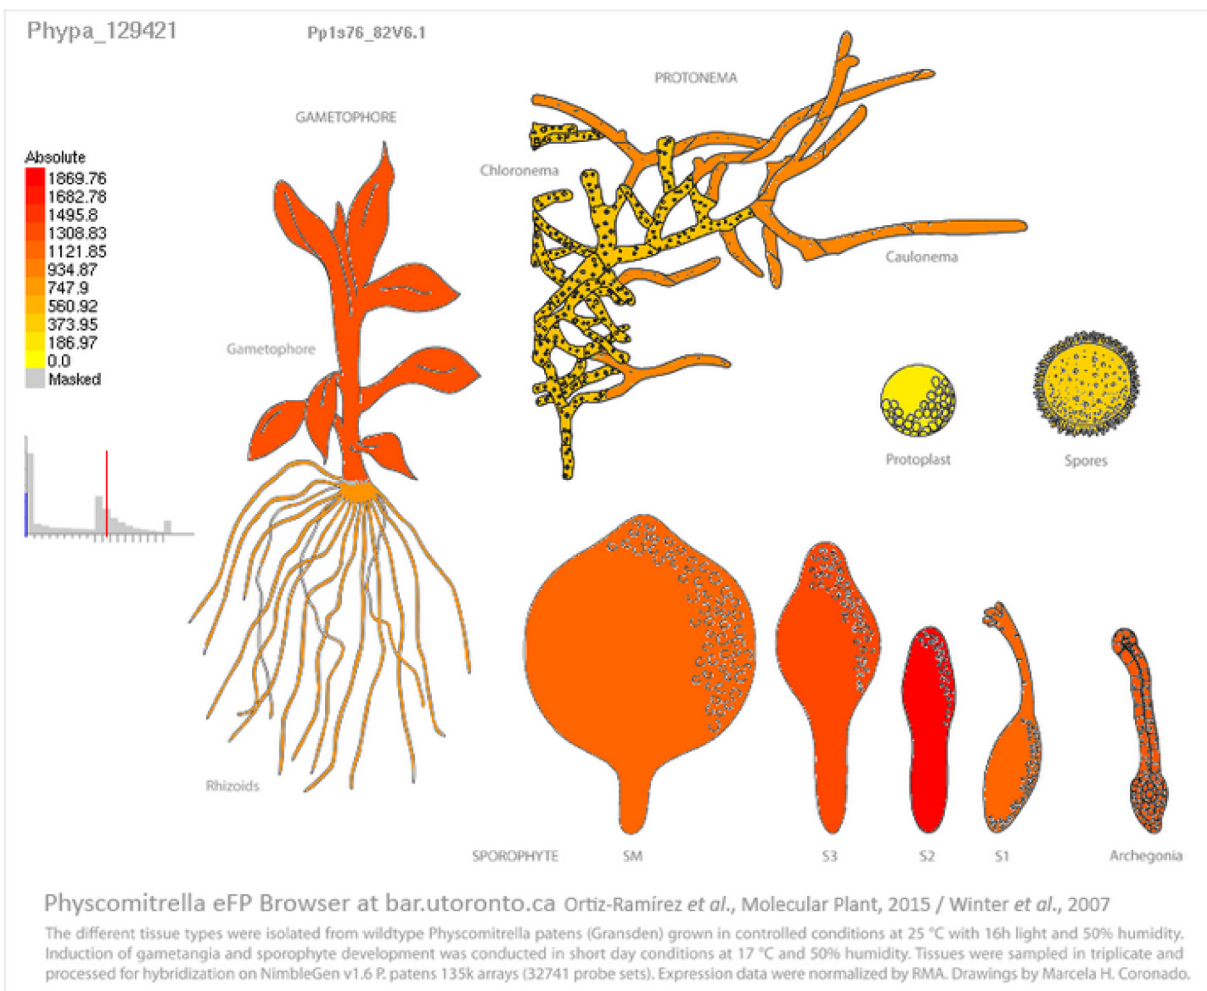

[Click Here for Table of Expression Values](#)

[Click Here for Chart of Expression Values](#)

• Pp1s76\_82V6.1 was used as the probe set identifier for your primary query, Phypa\_129421 (nuclear matrix constituent protein-related)

| <b>Group #</b> | <b>Tissue</b> | <b>Expression Level</b> | <b>Standard Deviation</b> | <b>Samples</b> | <b>Links</b>                      |
|----------------|---------------|-------------------------|---------------------------|----------------|-----------------------------------|
| 1              | Sporophyte S1 | 1128.22                 | 0.0                       | Sporophyte_S1, | <a href="#">To the Experiment</a> |
| 1              | Rhizoids      | 795.7                   | 0.0                       | Rhizoids,      | <a href="#">To the Experiment</a> |
| 1              | Gametophore   | 1292.66                 | 0.0                       | Gametophore,   | <a href="#">To the Experiment</a> |
| 1              | Sporophyte S2 | 1869.76                 | 0.0                       | Sporophyte_S2, | <a href="#">To the Experiment</a> |
| 1              | Sporophyte S3 | 1352.67                 | 0.0                       | Sporophyte_S3, | <a href="#">To the Experiment</a> |
| 1              | Caulonema     | 881.56                  | 0.0                       | Caulonema,     | <a href="#">To the Experiment</a> |
| 1              | Chloronema    | 433.7                   | 0.0                       | Chloronema,    | <a href="#">To the Experiment</a> |
| 1              | Archegonia    | 1233.16                 | 0.0                       | Archegonia,    | <a href="#">To the Experiment</a> |
| 1              | Protoplast    | 133.6                   | 0.0                       | Protoplast,    | <a href="#">To the Experiment</a> |
| 1              | Sporophyte M  | 1129.31                 | 0.0                       | Sporophyte_M,  | <a href="#">To the Experiment</a> |
| 1              | Spores        | 335.2                   | 0.0                       | Spores,        | <a href="#">To the Experiment</a> |

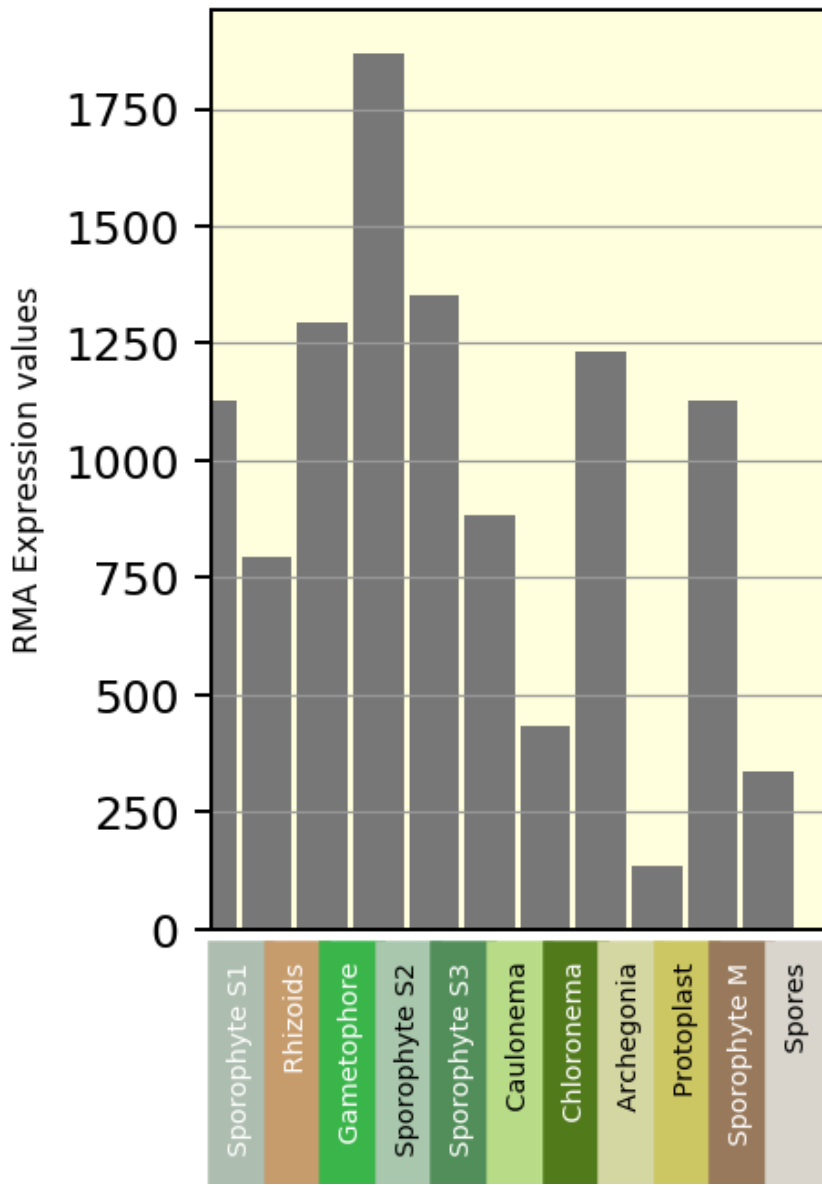

## Ppa2

Organism *Physcomitrella patens*

Transcript Name Pp3c1\_1360V3.1 (primary)

Alias Pp1s200\_64V6.1 Pp3c1\_1360E2.1 Pp3c1\_1360V1.1

Pp3c1\_1360 Pp1s200\_64V6 Phpat.001G006400 Pp3c1\_1360.v3.1

Pp3c1\_1360V1.1.v3.1

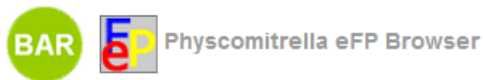

Like 1K

Data Source: Physcomitrella Mode: Absolute Primary Gene ID: Pp1s200\_64V6.1 Secondary Gene ID: Pp1s9\_9V6.1 Signal Threshold: 2301.04 Go

- For group1 data, this probe set reaches its maximum expression level (expression potential) of 2301.04 in the Physcomitrella data source.

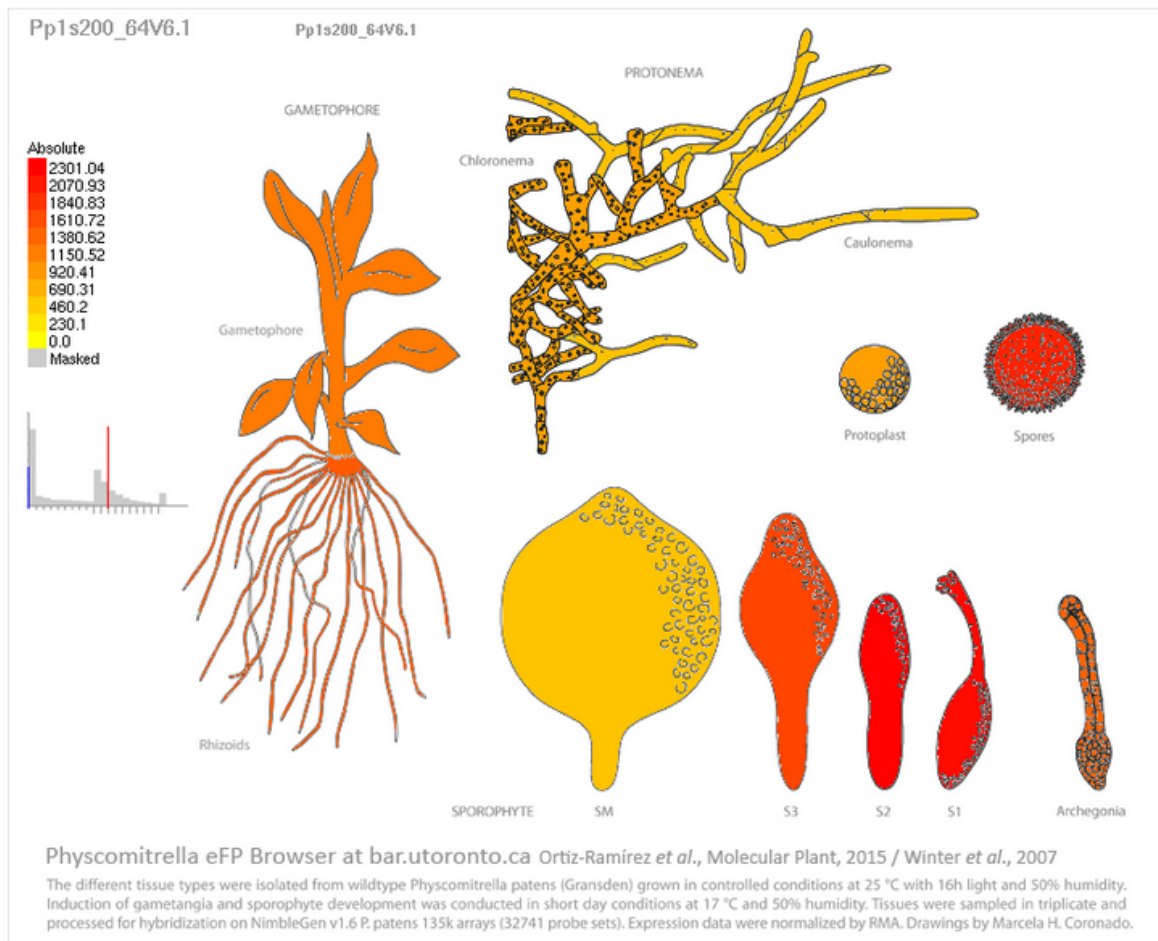

[Click Here for Table of Expression Values](#)

[Click Here for Chart of Expression Values](#)

- Pp1s200\_64V6.1 was used as the probe set identifier for your primary query, Pp1s200\_64V6.1 (little nuclei1)

| <b>Group #</b> | <b>Tissue</b> | <b>Expression Level</b> | <b>Standard Deviation</b> | <b>Samples</b> | <b>Links</b>                      |
|----------------|---------------|-------------------------|---------------------------|----------------|-----------------------------------|
| 1              | Sporophyte S1 | 2204.58                 | 0.0                       | Sporophyte_S1, | <a href="#">To the Experiment</a> |
| 1              | Rhizoids      | 1495.44                 | 0.0                       | Rhizoids,      | <a href="#">To the Experiment</a> |
| 1              | Gametophore   | 1207.46                 | 0.0                       | Gametophore,   | <a href="#">To the Experiment</a> |
| 1              | Sporophyte S2 | 2301.04                 | 0.0                       | Sporophyte_S2, | <a href="#">To the Experiment</a> |
| 1              | Sporophyte S3 | 1678.71                 | 0.0                       | Sporophyte_S3, | <a href="#">To the Experiment</a> |
| 1              | Caulonema     | 546.75                  | 0.0                       | Caulonema,     | <a href="#">To the Experiment</a> |
| 1              | Chloronema    | 849.87                  | 0.0                       | Chloronema,    | <a href="#">To the Experiment</a> |
| 1              | Archegonia    | 1404.33                 | 0.0                       | Archegonia,    | <a href="#">To the Experiment</a> |
| 1              | Protoplast    | 857.88                  | 0.0                       | Protoplast,    | <a href="#">To the Experiment</a> |
| 1              | Sporophyte M  | 540.09                  | 0.0                       | Sporophyte_M,  | <a href="#">To the Experiment</a> |
| 1              | Spores        | 1979.72                 | 0.0                       | Spores,        | <a href="#">To the Experiment</a> |

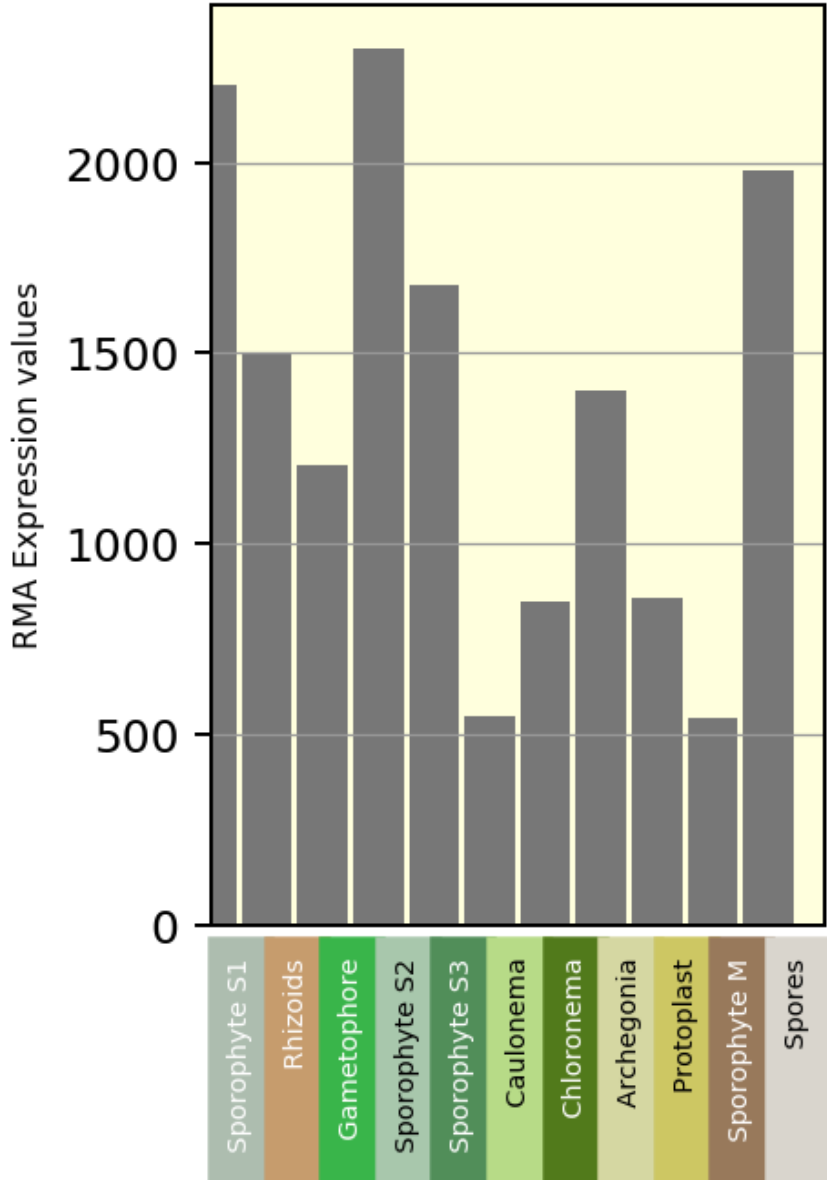

# Osa1

Organism *Oryza sariva*  
Transcript Name LOC\_Os02g48010.1

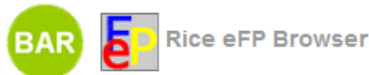

Data Source:  Mode:   Primary Gene ID:  Secondary Gene ID:  Signal Threshold:

- For group1 data, this probe set reaches its maximum expression level (expression potential) of 1386.88 in the rice\_mas or ricestigma\_mas or ricestress\_mas data source.
- For group1 data, note the maximum signal value has increased to 1165.24 from 20.92. Use the [Signal Threshold option to keep it constant at 20.92](#), or enter a value in the Signal Threshold box, such as [1386.88](#). The same colour scheme will then be applied across all views.
- Some samples exhibit high standard deviations for replicates. You can use [standard deviation filtering](#) to mask those with a deviation greater than half their expression value.

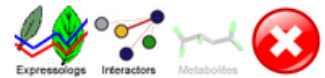

Rice eFP Browser at [bar.utoronto.ca](http://bar.utoronto.ca)  
LOC\_Os02g48010 Os.11658.1.S1\_at

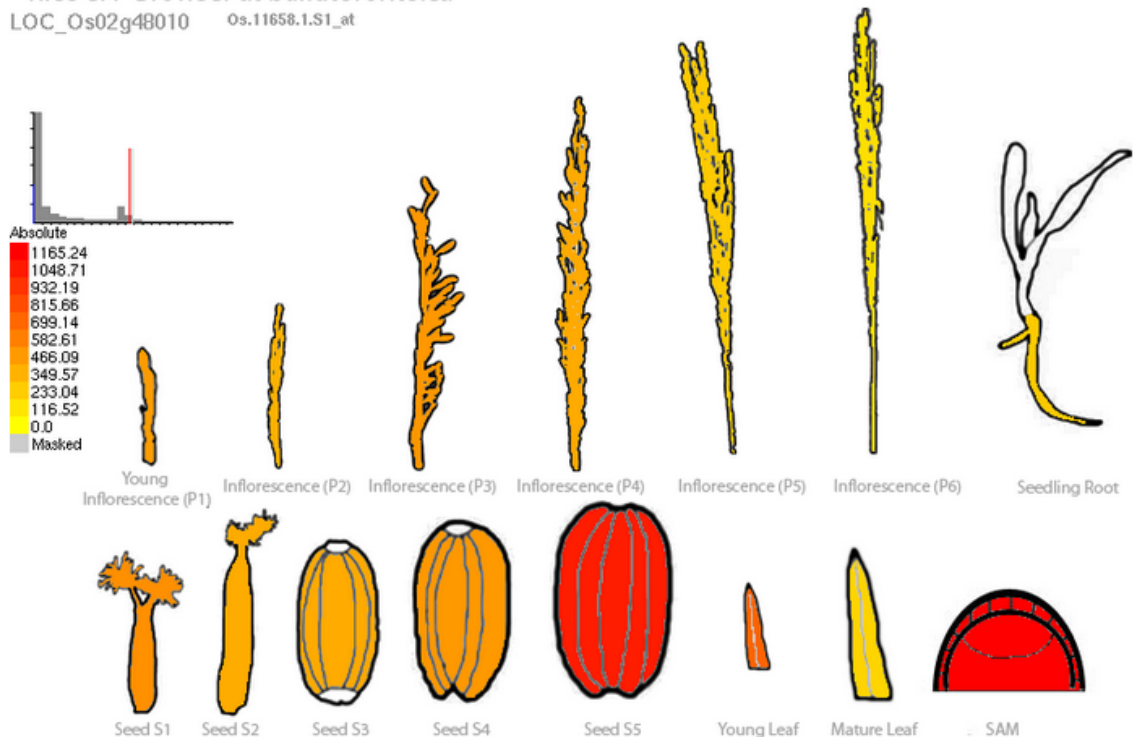

eFP by R. Patel. Drawings by R. Patel adapted from images provided by Dr. D. Barar at IRRI as well as images contained within F-Box Proteins in Rice. Genome-wide Analysis, Classification, Temporal, and Spatial Gene Expression during Panicle and Seed Development, and Regulation by Light and Abiotic Stress: Jain M, Nijhawan A, Arora R, Agarwal P et al. Plant Physiol 2007 Apr;143(4):1467-83. Data is derived from the same paper, and normalized by MAS 5.0 and RMA methods. TGT value of 100 was used and all tissues were sampled in triplicate.

[Click Here for Table of Expression Values](#)

[Click Here for Chart of Expression Values](#)

- Os.11658.1.S1\_at was used as the probe set identifier for your primary gene, LOC\_Os02g48010 (protein nuclear matrix constituent protein 1-like, putative, expressed)

## Osa2

Organism *Oryza sariva*  
Transcript Name LOC\_Os01g56140.1

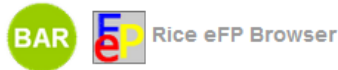

Data Source:  Mode:   Primary Gene ID:  Secondary Gene ID:  Signal Threshold:

- For group1 data, this probe set reaches its maximum expression level (expression potential) of **10446.8** in the **rice\_mas** or **ricestigma\_mas** or **ricestress\_mas** data source.
- For group1 data, note the maximum signal value has increased to 10023.36 from 1165.24. Use the [Signal Threshold option to keep it constant at 1165.24](#), or enter a value in the Signal Threshold box, such as [10446.8](#). The same colour scheme will then be applied across all views.

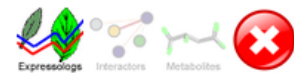

Rice eFP Browser at [bar.utoronto.ca](http://bar.utoronto.ca)  
LOC\_Os01g56140 Os.26362.1.S1\_at

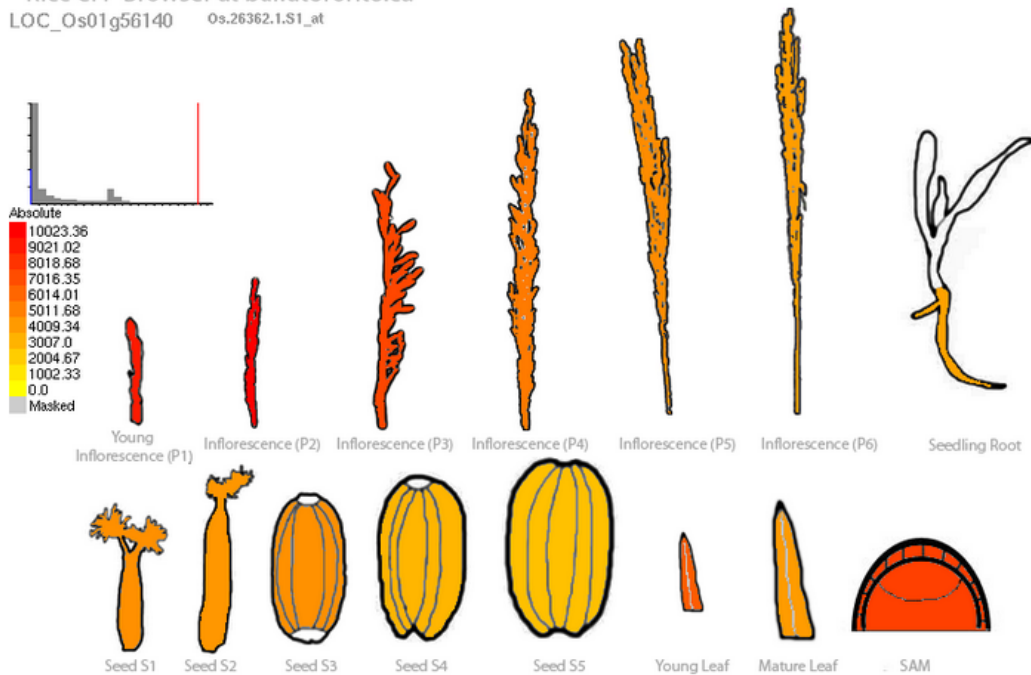

eFP by R. Patel. Drawings by R. Patel adapted from images provided by Dr. D. Brar at IRRRI as well as images contained within F-Box Proteins in Rice. Genome-wide Analysis, Classification, Temporal, and Spatial Gene Expression during Panicle and Seed Development, and Regulation by Light and Abiotic Stress: Jain M, Nijhawan A, Arora R, Agarwal P et al. Plant Physiol 2007 Apr;143(4):1467-83. Data is derived from the same paper, and normalized by MAS 5.0 and RMA methods. TGT value of 100 was used and all tissues were sampled in triplicate.

[Click Here for Table of Expression Values](#)

[Click Here for Chart of Expression Values](#)

- Os.26362.1.S1\_at was used as the probe set identifier for your primary gene, LOC\_Os01g56140 (protein expressed protein)



# Zma1

Organism

*Zea mays*

Transcript Name

GRMZM2G015875\_T01

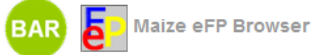

Like 1K

Data Source: Sekhon et al Atlas | Mode: Absolute | Primary Gene ID: GRMZM2G015875 | Secondary Gene ID: GRMZM2G011169 | Signal Threshold: 16032.73 | Go

- For group1 data, this probe set reaches its maximum expression level (expression potential) of 17821.3 in the maize\_RMA\_linear data source.
- For group1 data, note the maximum signal value has increased to 16032.73 from 20.92. Use the [Signal Threshold option to keep it constant at 20.92](#), or enter a value in the Signal Threshold box, such as [17821.3](#). The same colour scheme will then be applied across all views.

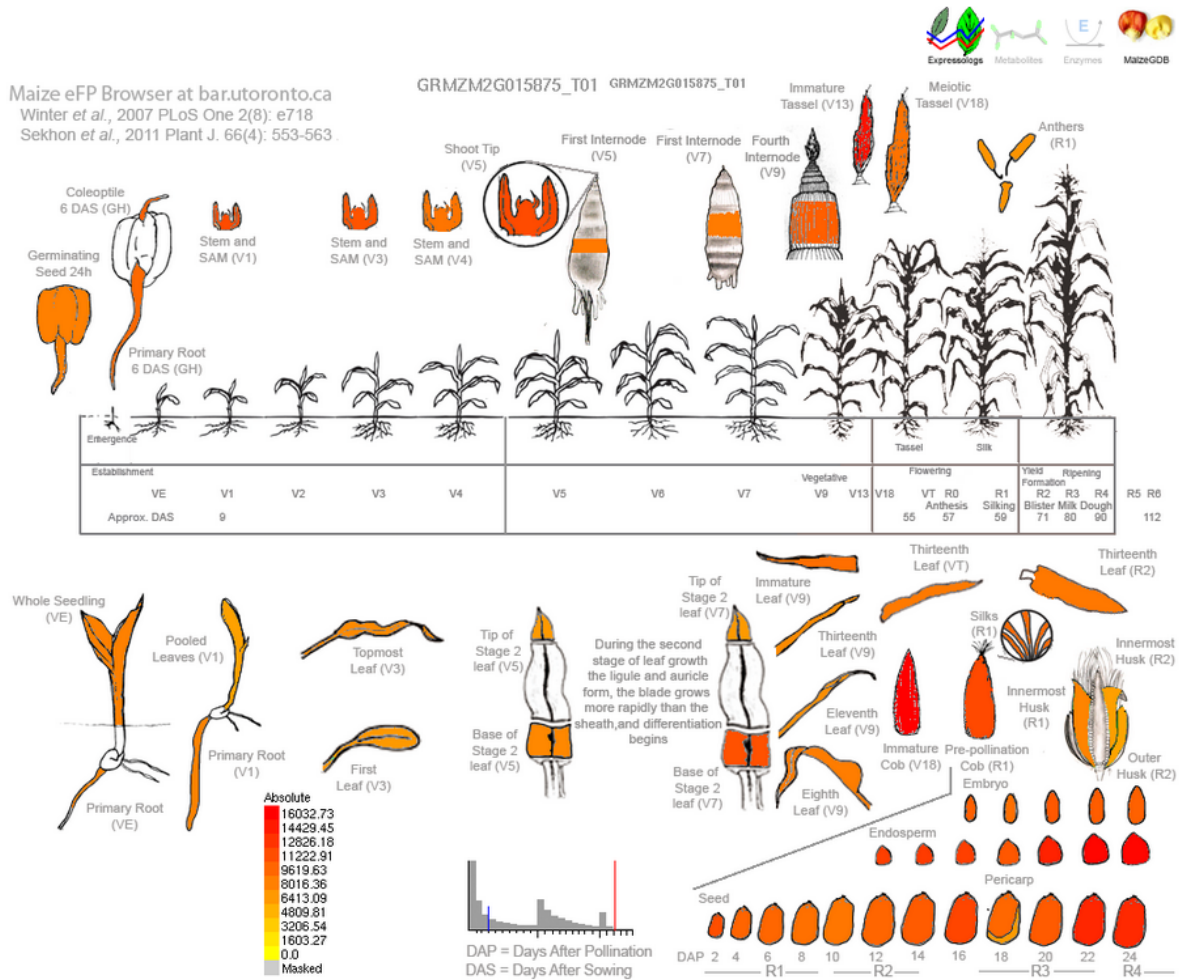

eFP by R. Patel. Images provided by Shawn Kaeppeler's group at University of Wisconsin - Madison. Data were derived from Genome-wide atlas of transcription during maize development: R. Sekhon et al., (2011) The Plant Journal 66(4): 553-563. Data were Nimblegen derived and were normalized using RMA and are provided as linearized data. All tissues were sampled in triplicate.

# Zma2

Organism *Zea mays*  
 Transcript Name GRMZM2G320013\_T01

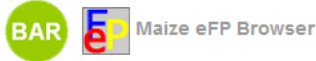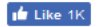

Data Source: Sekhon et al Atlas | Mode: Absolute | Primary Gene ID: GRMZM2G320013 | Secondary Gene ID: GRMZM2G011169 | Signal Threshold: 14267.36 | Go

- For group1 data, this probe set reaches its maximum expression level (expression potential) of 16128.5 in the maize\_RMA\_linear data source.
- For group1 data, note the maximum signal value has increased to 14267.36 from 35.01. Use the [Signal Threshold option to keep it constant at 35.01](#), or enter a value in the Signal Threshold box, such as [16128.5](#). The same colour scheme will then be applied across all views.

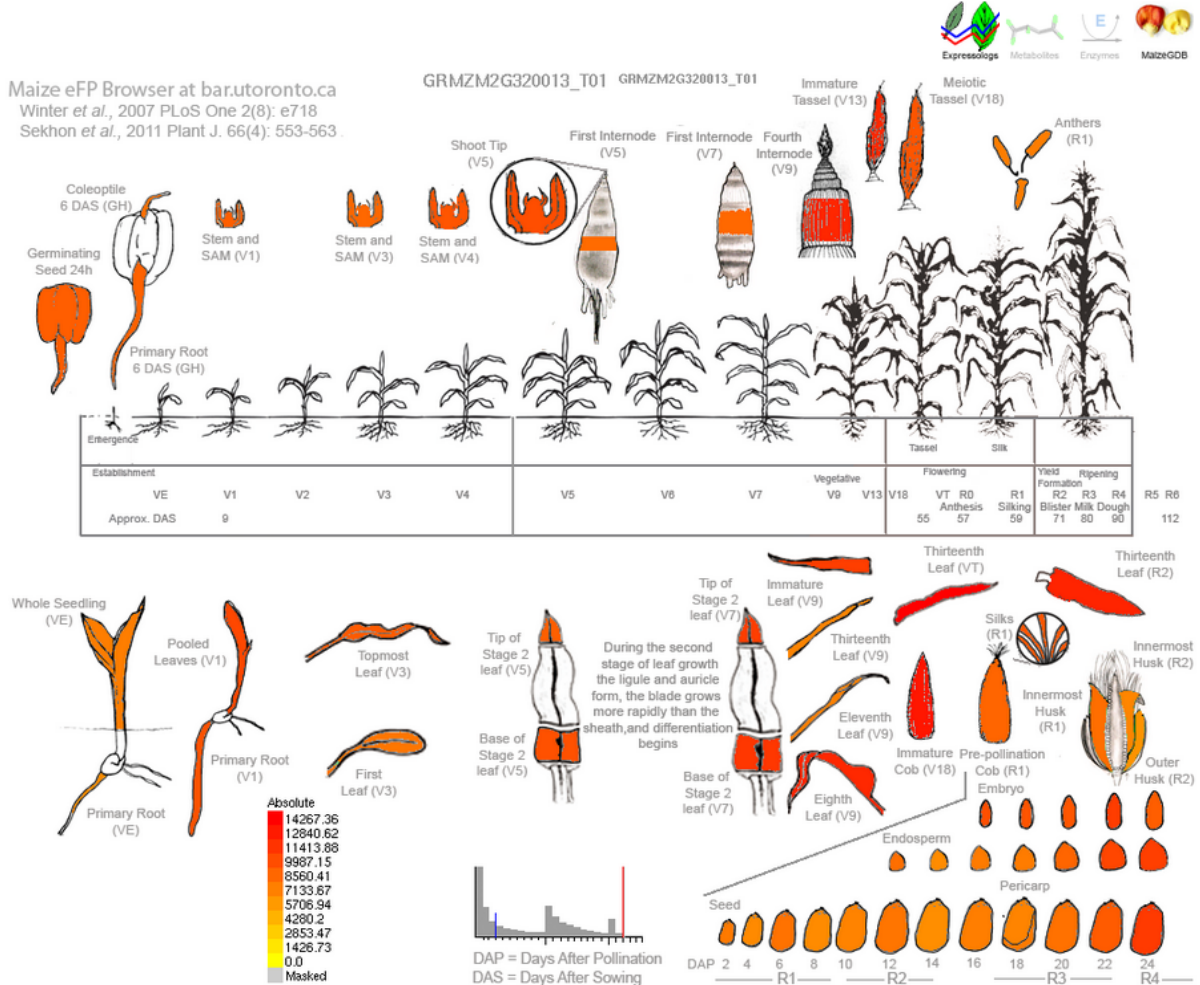

eFP by R. Patel. Images provided by Shawn Kaeppeler's group at University of Wisconsin - Madison. Data were derived from Genome-wide atlas of transcription during maize development: R. Sekhon et al., (2011) The Plant Journal 66(4): 553-563. Data were Nimblegen derived and were normalized using RMA and are provided as linearized data. All tissues were sampled in triplicate.

[Click Here for Table of Expression Values](#) | [Click Here for Chart of Expression Values](#)

- GRMZM2G320013\_T01 was used as the probe set identifier for your primary gene, GRMZM2G320013\_T01 (expressed protein)

# Bdi1

Organism

*Brachypodium distachyon*

Transcript Name

Bradi3g53047.1

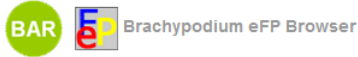

Like 1K

Data Source: Brachypodium Atlas | Mode: Absolute | Primary Gene ID: Bradi3g53047.1 | Secondary Gene ID: Bradi4g08230.1 | Signal Threshold: 2509.85 | Go

For group1 data, this probe set reaches its maximum expression level (expression potential) of 2533.3 in the Brachypodium Atlas data source.

Bradi3g53047.1 Bradi3g53047.1

Brachypodium distachyon eFP Browser at <http://bar.utoronto.ca>  
Sibout et al., 2017; Winter et al., 2007. PLoS One 2: e718

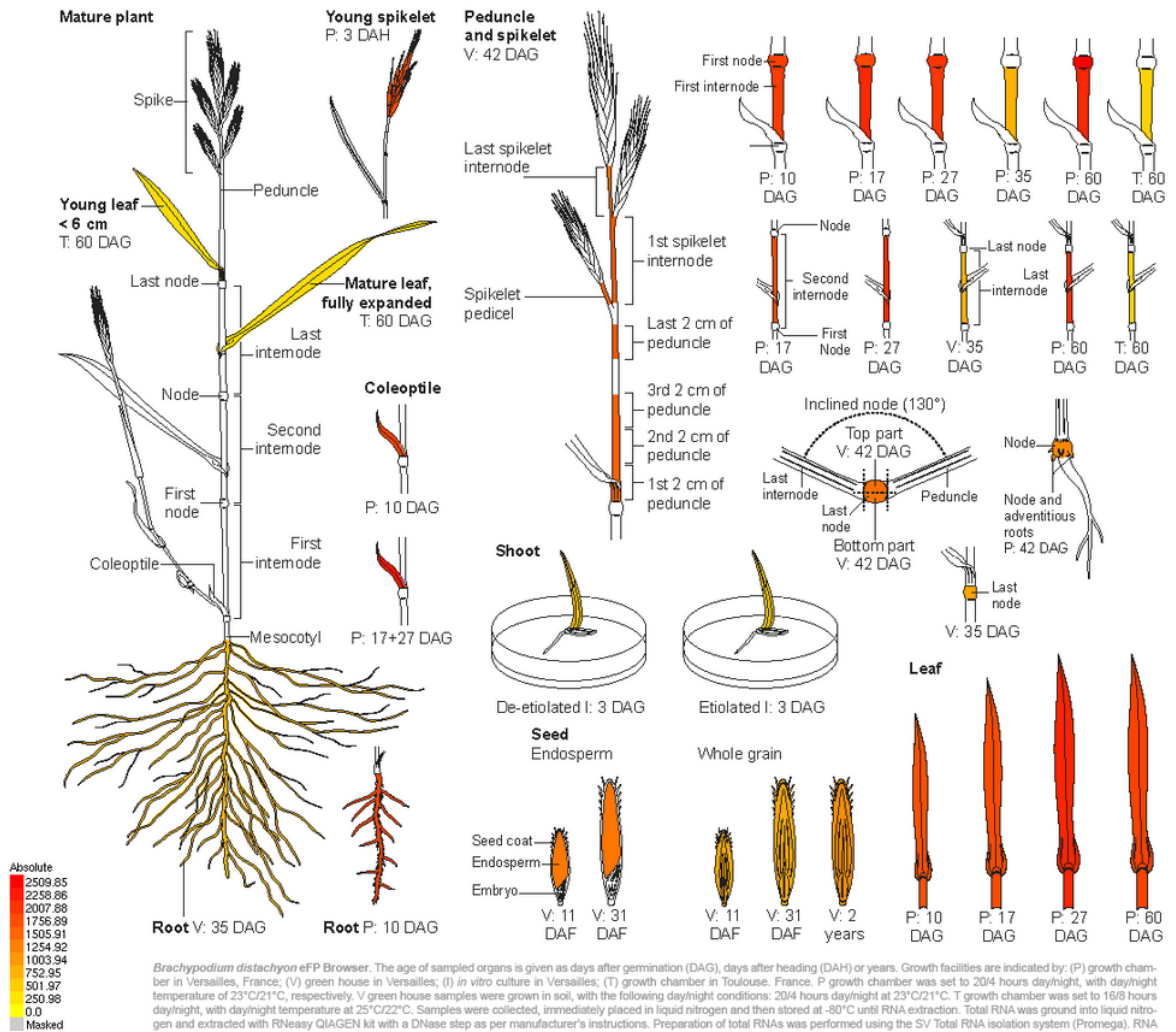

# Bdi2

Organism

*Brachypodium distachyon*

Transcript Name

Bradi2g50990.1

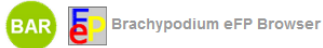

Like 1K

Data Source: Brachypodium Atlas | Mode: Absolute | Primary Gene ID: Bradi2g50990.1 | Secondary Gene ID: Bradi4g08230.1 | Signal Threshold: 744.05 | Go

For group1 data, this probe set reaches its maximum expression level (expression potential) of 802.8 in the Brachypodium Atlas data source.

Bradi2g50990.1 Bradi2g50990.1

Brachypodium distachyon eFP Browser at <http://bar.utoronto.ca>  
Sibout et al., 2017; Winter et al., 2007. PLoS One 2: e718

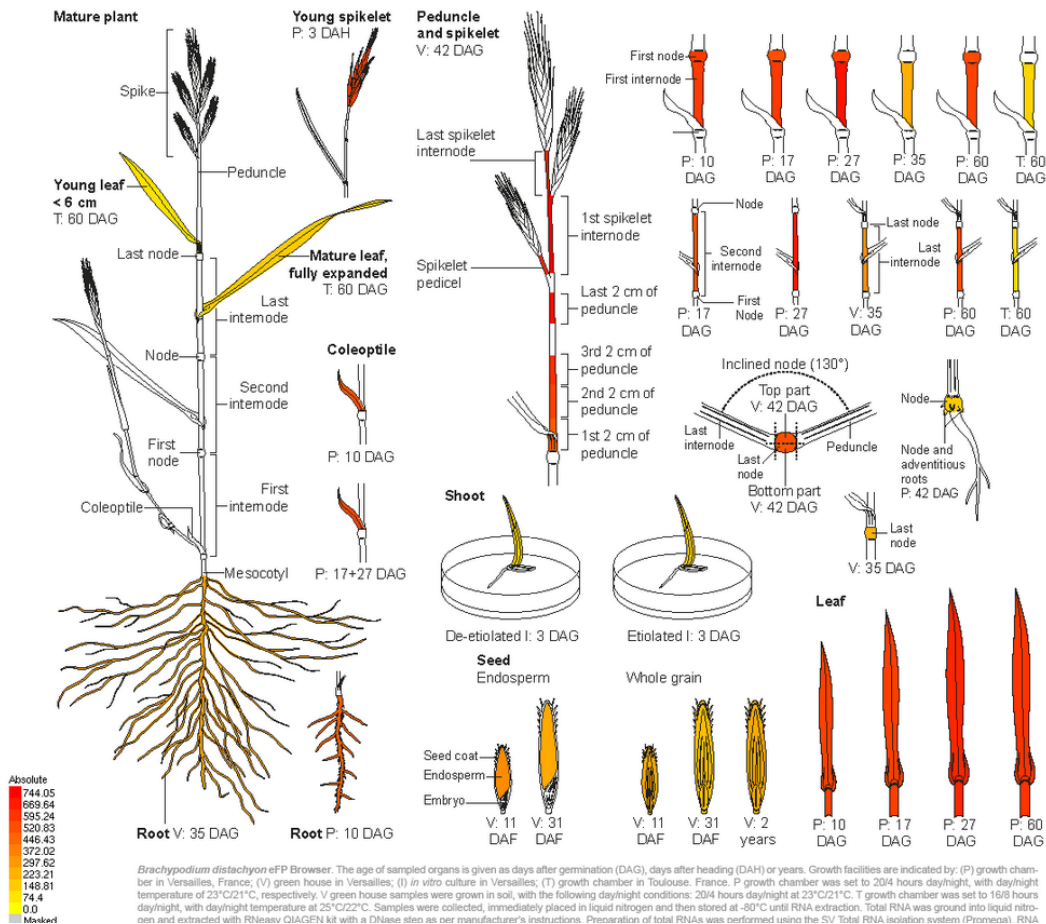

# Gma11

Organism

*Glycine max*

Transcript Name

Glyma.18G280500.1 (Glyma18g51560)

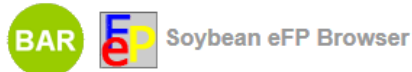

Like 1K

Data Source: soybean Mode: Absolute Primary Gene ID: Glyma.18G280500 Secondary Gene ID: Glyma06g47390 Signal Threshold: 166.42 Go

- For group1 data, this probe set reaches its maximum expression level (expression potential) of 166.42 in the Soybean data source.

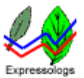

Soybean eFP Browser at bar.utoronto.ca  
Glyma.18g280500 Glyma18g51560

HAI = Hours after Inoculation

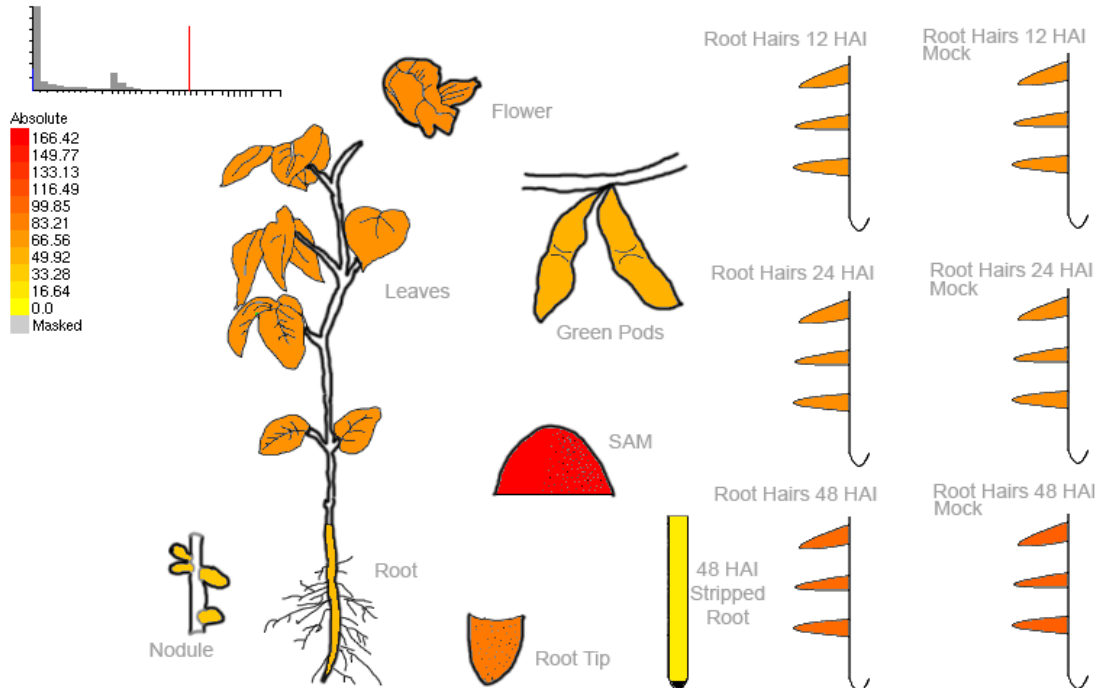

eFP by R. Patel. Drawings by R. Patel. Data for Root Hair series from Complete Transcriptome of Soybean Root Hair Cell, a Single Cell Model, and its alteration in response to *Bradyrhizobium japonicum* infection: Libault, M., Farmer, A., Brechnmacher, L et al. (2010). Plant Physiol. 152, 541-552. All other data from An Integrated Transcriptome Atlas of the Crop Model *Glycine max*, and its use in Comparative Analyses in Plants: Libault, M., et al. (2010) The Plant Journal 63, 86-99. Data is mRNA-Seq derived data and all samples were sampled in triplicate.

[Click Here for Table of Expression Values](#)

[Click Here for Chart of Expression Values](#)

- Glyma18g51560 was used as the probe set identifier for your primary gene, Glyma.18g280500 (LINC1 little nuclei1)

# Gma1H

Organism

*Glycine max*

Transcript Name

Glyma.08G256300.1 (Glyma08g28630)

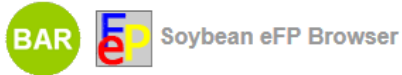

Like 1K

Data Source: soybean Mode:   Primary Gene ID: Glyma.08G256300 Secondary Gene ID: Glyma06g47390 Signal Threshold:  115.76 Go

For group1 data, this probe set reaches its maximum expression level (expression potential) of 115.76 in the Soybean data source.

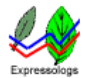

Soybean eFP Browser at bar.utoronto.ca  
Glyma.08g256300 Glyma08g28630

HAI = Hours after Inoculation

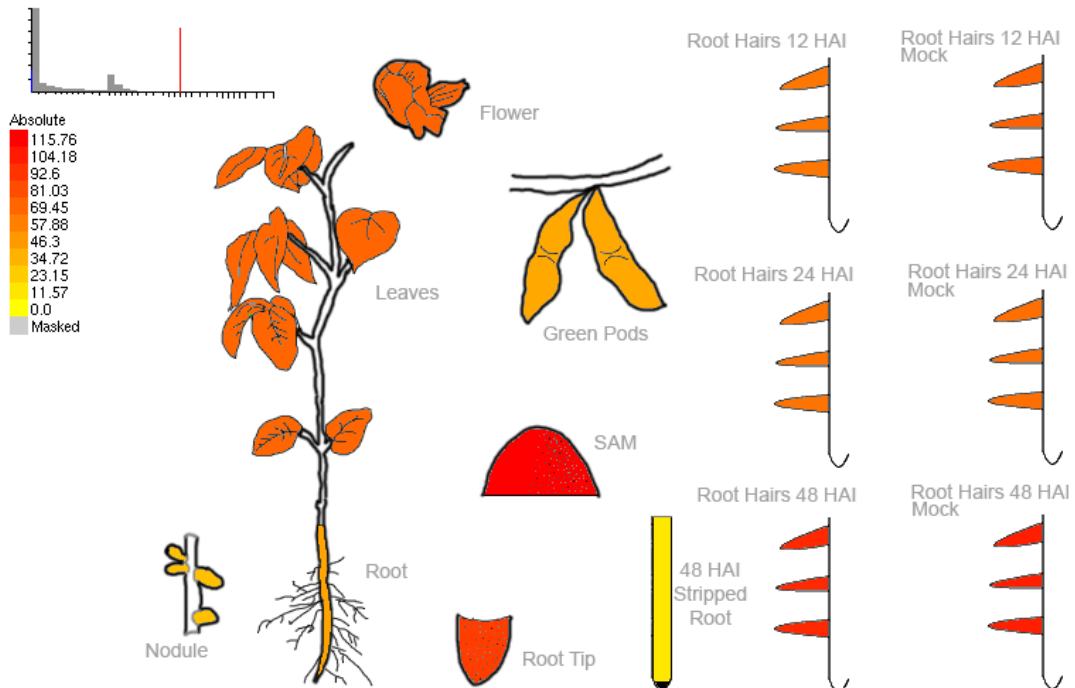

eFP by R. Patel. Drawings by R. Patel. Data for Root Hair series from Complete Transcriptome of Soybean Root Hair Cell, a Single Cell Model, and its alteration in response to *Bradyrhizobium japonicum* infection: Libault, M., Farmer, A., Brechnmacher, L et al. (2010). Plant Physiol. 152, 541-552. All other data from An Integrated Transcriptome Atlas of the Crop Model *Glycine max*, and its use in Comparative Analyses in Plants: Libault, M., et al. (2010) The Plant Journal 63, 86-99. Data is mRNA-Seq derived data and all samples were sampled in triplicate.

[Click Here for Table of Expression Values](#)

[Click Here for Chart of Expression Values](#)

# Gma2II

Organism

*Glycine max*

Transcript Name

Glyma.17G157900.1

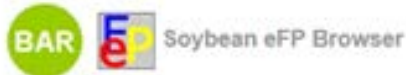

Like 1K

Data Source: soybean Mode: Absolute Primary Gene ID: Glyma.17G157900 Secondary Gene ID: Glyma06g17390 Signal Threshold: 83.84 Go

For group1 data, this probe set reaches its maximum expression level (expression potential) of 83.84 in the Soybean data source.

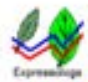

Soybean eFP Browser at bar.utoronto.ca  
Glyma.17g157900 Glyma17g16970

HAI = Hours after Inoculation

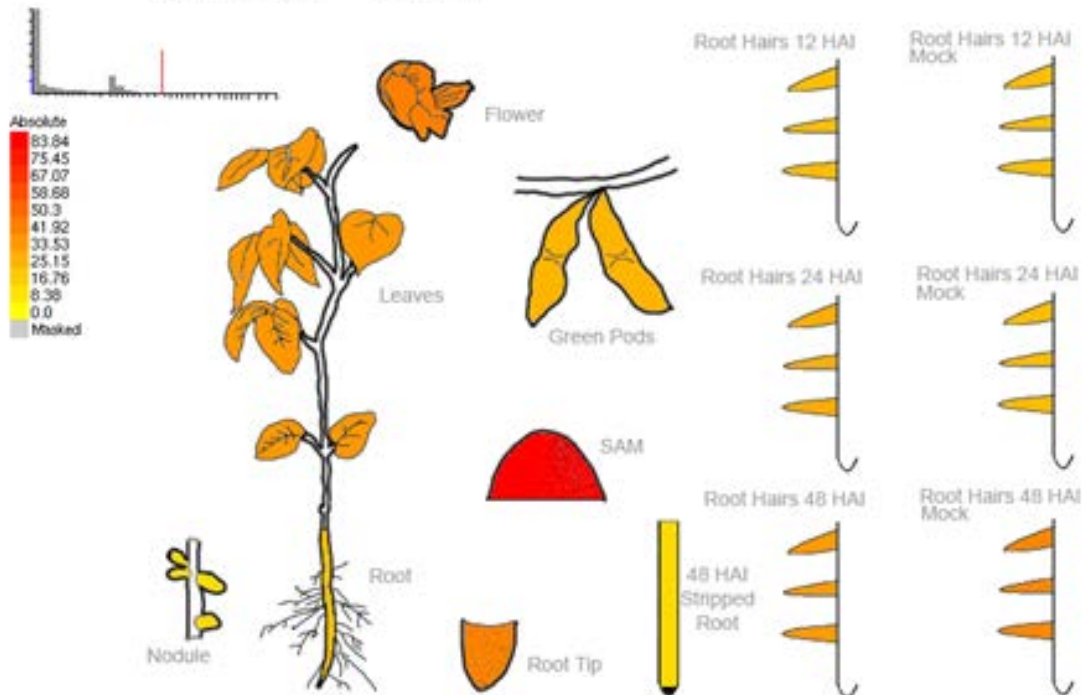

eFP by R. Patel. Drawings by R. Patel. Data for Root Hair series from Complete Transcriptome of Soybean Root Hair Cell, a Single Cell Model, and its alteration in response to *Bradyrhizobium japonicum* infection: Libault, M., Farmer, A., Brechtmacher, L et al. (2010) Plant Physiol. 152, 541-552. All other data from An Integrated Transcriptome Atlas of the Crop Model *Glycine max*, and its use in Comparative Analyses in Plants: Libault, M., et al. (2010) The Plant Journal 63, 86-99. Data is mRNA-Seq derived data and all samples were sampled in triplicate.

[Click Here for Table of Expression Values](#)

[Click Here for Chart of Expression Values](#)

Glyma17g16970 was used as the probe set identifier for your primary gene, Glyma.17g157900 (LINC4 little nucleid)

# Gma3II

Organism

*Glycine max*

Transcript Name

Glyma.01G090100.1

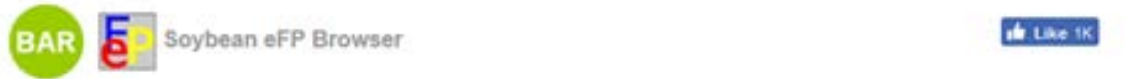

Data Source: soybean Mode: Absolute Primary Gene ID: Glyma.01G090100 Secondary Gene ID: Glyma06g47390 Signal Threshold: 6.07 Go

For group1 data, this probe set reaches its maximum expression level (expression potential) of 6.08 in the Soybean data source.

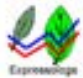

Soybean eFP Browser at bar.utoronto.ca  
Glyma.01g090100 Glyma01g22710

HAI = Hours after Inoculation

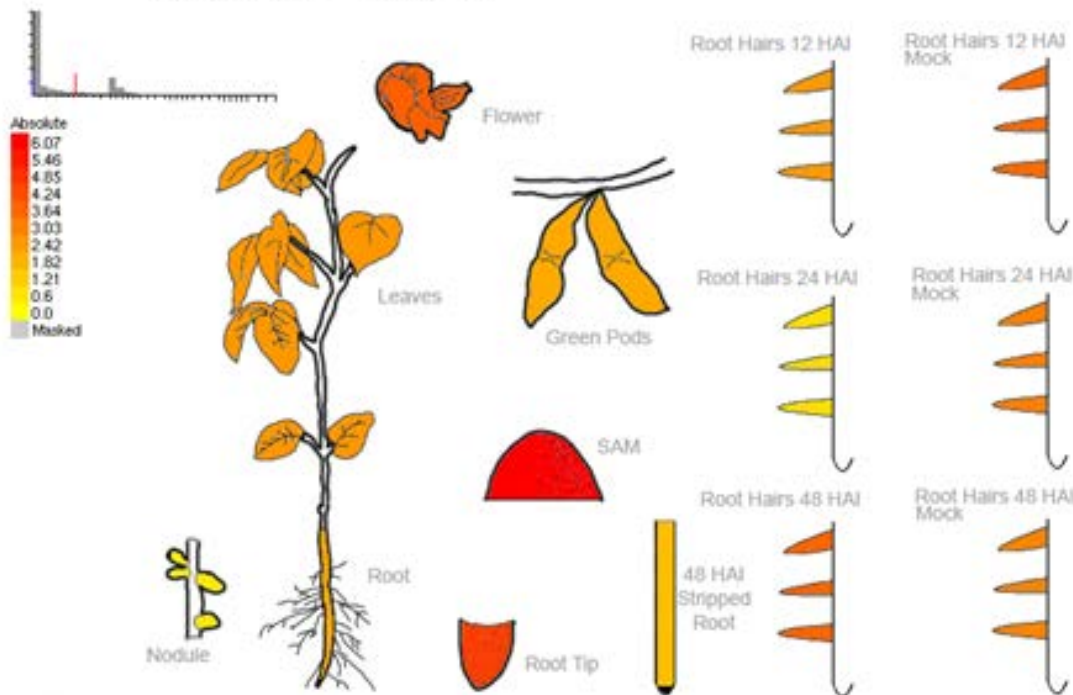

eFP by R. Patel. Drawings by R. Patel. Data for Root Hair series from Complete Transcriptome of Soybean Root Hair Cell, a Single Cell Model, and its alteration in response to *Bradyrhizobium japonicum* infection; Libault, M., Farmer, A., Brechtmacher, L et al. (2010) Plant Physiol. 152, 541-552. All other data from An Integrated Transcriptome Atlas of the Crop Model *Glycine max*, and its use in Comparative Analyses in Plants; Libault, M., et al. (2010) The Plant Journal 63, 86-99. Data is mRNA-Seq derived data and all samples were sampled in triplicate.

[Click Here for Table of Expression Values](#)

[Click Here for Chart of Expression Values](#)

Glyma01g22710 was used as the probe set identifier for your primary gene, Glyma.01g090100 (LINC1 little nucleol1)
